# Supplementary material
Source: publisher figshare collection journal article supplement (https://acs.figshare.com/ndownloader/files/10302231)
Supplement: Supplementary file 1 [file 10302231]

 
data_9b
 
_audit_creation_method            SHELXL-2013
_chemical_name_systematic
;
 ?
;
_chemical_name_common             ?
_chemical_melting_point           ?
_chemical_formula_moiety          'C20 H23 N1 O4 S2'
_chemical_formula_sum
 'C20 H23 N O4 S2' 
_chemical_formula_weight          405.51

loop_
 _atom_type_symbol
 _atom_type_description
 _atom_type_scat_dispersion_real
 _atom_type_scat_dispersion_imag
 _atom_type_scat_source
 'C'  'C'   0.0033   0.0016
 'International Tables Vol C Tables 4.2.6.8 and 6.1.1.4'
 'H'  'H'   0.0000   0.0000
 'International Tables Vol C Tables 4.2.6.8 and 6.1.1.4'
 'N'  'N'   0.0061   0.0033
 'International Tables Vol C Tables 4.2.6.8 and 6.1.1.4'
 'O'  'O'   0.0106   0.0060
 'International Tables Vol C Tables 4.2.6.8 and 6.1.1.4'
 'S'  'S'   0.1246   0.1234
 'International Tables Vol C Tables 4.2.6.8 and 6.1.1.4'
 
_space_group_crystal_system       monoclinic
_space_group_IT_number            14
_space_group_name_H-M_alt         'P 21/n'
_space_group_name_Hall            '-P 2yn'
 
_shelx_space_group_comment
;
The symmetry employed for this shelxl refinement is uniquely defined
by the following loop, which should always be used as a source of
symmetry information in preference to the above space-group names.
They are only intended as comments.
;
 
loop_
 _space_group_symop_operation_xyz
 'x, y, z'
 '-x+1/2, y+1/2, -z+1/2'
 '-x, -y, -z'
 'x-1/2, -y-1/2, z-1/2'
 
_cell_length_a                    16.1887(15)
_cell_length_b                    6.0567(6)
_cell_length_c                    21.921(2)
_cell_angle_alpha                 90
_cell_angle_beta                  111.150(3)
_cell_angle_gamma                 90
_cell_volume                      2004.6(3)
_cell_formula_units_Z             4
_cell_measurement_temperature     293(2)
_cell_measurement_reflns_used     46978 
_cell_measurement_theta_min       3.5
_cell_measurement_theta_max       27.6
 
_exptl_crystal_description        Block
_exptl_crystal_colour             Colourless
_exptl_crystal_density_meas       ? 
_exptl_crystal_density_method     ?              
_exptl_crystal_density_diffrn     1.344          
_exptl_crystal_F_000              856
_exptl_transmission_factor_min    ?                                             
_exptl_transmission_factor_max    ?                                             
_exptl_crystal_size_max           0.25
_exptl_crystal_size_mid           0.15
_exptl_crystal_size_min           0.12
_exptl_absorpt_coefficient_mu     0.291
_shelx_estimated_absorpt_T_min    0.949
_shelx_estimated_absorpt_T_max    0.966
_exptl_absorpt_correction_type    'empirical'
_exptl_absorpt_correction_T_min   0.949
_exptl_absorpt_correction_T_max   0.966
_exptl_absorpt_process_details    'SADABS'
 
_exptl_special_details
;
 ?
;
 
_diffrn_ambient_temperature       293(2)
_diffrn_radiation_wavelength      0.71073
_diffrn_radiation_type            MoK\a
_diffrn_source                    ?                       
_diffrn_measurement_device_type   'Bruker APEX-II CCD' 
_diffrn_measurement_method        ? 
_diffrn_detector_area_resol_mean  ? 
_diffrn_reflns_number             46978
_diffrn_reflns_av_unetI/netI      0.0349
_diffrn_reflns_av_R_equivalents   0.0612
_diffrn_reflns_limit_h_min        -21
_diffrn_reflns_limit_h_max        21
_diffrn_reflns_limit_k_min        -7
_diffrn_reflns_limit_k_max        7
_diffrn_reflns_limit_l_min        -28
_diffrn_reflns_limit_l_max        28
_diffrn_reflns_theta_min          3.508
_diffrn_reflns_theta_max          27.567
_diffrn_reflns_theta_full         25.242
_diffrn_measured_fraction_theta_max   0.995
_diffrn_measured_fraction_theta_full  0.998
_diffrn_reflns_Laue_measured_fraction_max    0.995
_diffrn_reflns_Laue_measured_fraction_full   0.998
_diffrn_reflns_point_group_measured_fraction_max   0.995
_diffrn_reflns_point_group_measured_fraction_full  0.998
_reflns_number_total              4616
_reflns_number_gt                 2953
_reflns_threshold_expression      'I > 2\s(I)'
_reflns_Friedel_coverage          0.000
_reflns_Friedel_fraction_max      .
_reflns_Friedel_fraction_full     .
 
_reflns_special_details
;
 Reflections were merged by SHELXL according to the crystal
 class for the calculation of statistics and refinement.
 
 _reflns_Friedel_fraction is defined as the number of unique
 Friedel pairs measured divided by the number that would be
 possible theoretically, ignoring centric projections and
 systematic absences.
;
 
_computing_data_collection        ?
_computing_cell_refinement        ?
_computing_data_reduction         ?
_computing_structure_solution     ?
_computing_structure_refinement   'SHELXL-2013 (Sheldrick, 2013)'
_computing_molecular_graphics     ?
_computing_publication_material   ?
 
_refine_special_details
;
 ?
;
_refine_ls_structure_factor_coef  Fsqd
_refine_ls_matrix_type            full
_refine_ls_weighting_scheme       calc
_refine_ls_weighting_details
'w=1/[\s^2^(Fo^2^)+(0.1000P)^2^] where P=(Fo^2^+2Fc^2^)/3'
_atom_sites_solution_primary      ?
_atom_sites_solution_secondary    ?
_atom_sites_solution_hydrogens    geom
_refine_ls_hydrogen_treatment     constr
_refine_ls_extinction_method      none
_refine_ls_extinction_coef        .
_refine_ls_number_reflns          4616
_refine_ls_number_parameters      246
_refine_ls_number_restraints      0
_refine_ls_R_factor_all           0.0918
_refine_ls_R_factor_gt            0.0470
_refine_ls_wR_factor_ref          0.1588
_refine_ls_wR_factor_gt           0.1346
_refine_ls_goodness_of_fit_ref    1.007
_refine_ls_restrained_S_all       1.007
_refine_ls_shift/su_max           0.027
_refine_ls_shift/su_mean          0.003
 
loop_
 _atom_site_label
 _atom_site_type_symbol
 _atom_site_fract_x
 _atom_site_fract_y
 _atom_site_fract_z
 _atom_site_U_iso_or_equiv
 _atom_site_adp_type
 _atom_site_occupancy
 _atom_site_site_symmetry_order  
 _atom_site_calc_flag
 _atom_site_refinement_flags_posn
 _atom_site_refinement_flags_adp
 _atom_site_refinement_flags_occupancy
 _atom_site_disorder_assembly
 _atom_site_disorder_group
S1 S 0.48620(3) 0.80909(9) 0.20214(2) 0.04393(19) Uani 1 1 d . . . . .
S2 S 0.39858(4) 0.83459(14) 0.02180(3) 0.0677(3) Uani 1 1 d . . . . .
O1 O 0.12889(11) 0.6738(3) -0.02578(8) 0.0662(5) Uani 1 1 d . . . . .
O2 O 0.24641(12) 0.4547(3) 0.00242(10) 0.0834(6) Uani 1 1 d . . . . .
O3 O 0.49349(11) 0.9430(3) 0.25695(7) 0.0645(5) Uani 1 1 d . . . . .
O4 O 0.47347(10) 0.5769(2) 0.20458(8) 0.0579(4) Uani 1 1 d . . . . .
N1 N 0.39987(11) 0.9027(3) 0.14087(8) 0.0400(4) Uani 1 1 d . . . . .
C1 C 0.81290(19) 0.9852(6) 0.13804(16) 0.0913(10) Uani 1 1 d . . . . .
H3 H 0.8250 1.1408 0.1418 0.137 Uiso 1 1 calc R U . . .
H23 H 0.8030 0.9381 0.0941 0.137 Uiso 1 1 calc R U . . .
H1 H 0.8625 0.9065 0.1680 0.137 Uiso 1 1 calc R U . . .
C2 C 0.73160(15) 0.9383(4) 0.15398(11) 0.0568(6) Uani 1 1 d . . . . .
C3 C 0.68295(16) 0.7473(4) 0.13285(11) 0.0579(6) Uani 1 1 d . . . . .
H4 H 0.7007 0.6456 0.1082 0.069 Uiso 1 1 calc R U . . .
C4 C 0.60869(15) 0.7051(4) 0.14757(11) 0.0483(5) Uani 1 1 d . . . . .
H5 H 0.5768 0.5755 0.1331 0.058 Uiso 1 1 calc R U . . .
C5 C 0.58173(13) 0.8558(3) 0.18382(10) 0.0390(5) Uani 1 1 d . . . . .
C6 C 0.35544(13) 0.7615(4) 0.08585(10) 0.0414(5) Uani 1 1 d . . . . .
H6 H 0.3690 0.6067 0.0984 0.050 Uiso 1 1 calc R U . . .
C7 C 0.25396(13) 0.7980(3) 0.06031(10) 0.0417(5) Uani 1 1 d . . . . .
H7 H 0.2414 0.9414 0.0382 0.050 Uiso 1 1 calc R U . . .
C8 C 0.21125(15) 0.6203(4) 0.00994(11) 0.0513(6) Uani 1 1 d . . . . .
C9 C 0.0795(2) 0.5180(5) -0.07654(14) 0.0902(10) Uani 1 1 d . . . . .
H14 H 0.1160 0.4748 -0.1013 0.108 Uiso 1 1 calc R U . . .
H13 H 0.0272 0.5908 -0.1064 0.108 Uiso 1 1 calc R U . . .
C10 C 0.0519(2) 0.3152(7) -0.04972(19) 0.1156(14) Uani 1 1 d . . . . .
H15 H 0.1035 0.2309 -0.0252 0.173 Uiso 1 1 calc R U . . .
H16 H 0.0138 0.2273 -0.0851 0.173 Uiso 1 1 calc R U . . .
H2 H 0.0209 0.3573 -0.0216 0.173 Uiso 1 1 calc R U . . .
C11 C 0.40706(16) 1.1261(4) 0.11671(12) 0.0547(6) Uani 1 1 d . . . . .
H20 H 0.4513 1.2105 0.1505 0.066 Uiso 1 1 calc R U . . .
H19 H 0.3508 1.2022 0.1051 0.066 Uiso 1 1 calc R U . . .
C12 C 0.43346(18) 1.1050(5) 0.05679(13) 0.0725(8) Uani 1 1 d . . . . .
H17 H 0.4971 1.1207 0.0694 0.087 Uiso 1 1 calc R U . . .
H18 H 0.4048 1.2191 0.0252 0.087 Uiso 1 1 calc R U . . .
C13 C 0.21401(13) 0.7978(3) 0.11305(10) 0.0408(5) Uani 1 1 d . . . . .
C14 C 0.21784(16) 0.6166(4) 0.15171(12) 0.0529(6) Uani 1 1 d . . . . .
H12 H 0.2477 0.4907 0.1467 0.064 Uiso 1 1 calc R U . . .
C15 C 0.17801(16) 0.6184(4) 0.19804(13) 0.0615(7) Uani 1 1 d . . . . .
H8 H 0.1808 0.4943 0.2237 0.074 Uiso 1 1 calc R U . . .
C16 C 0.13461(16) 0.8031(4) 0.20593(12) 0.0615(7) Uani 1 1 d . . . . .
H9 H 0.1071 0.8042 0.2365 0.074 Uiso 1 1 calc R U . . .
C17 C 0.13160(17) 0.9860(4) 0.16900(13) 0.0636(7) Uani 1 1 d . . . . .
H11 H 0.1029 1.1125 0.1751 0.076 Uiso 1 1 calc R U . . .
C18 C 0.17084(15) 0.9847(4) 0.12274(11) 0.0518(6) Uani 1 1 d . . . . .
H10 H 0.1684 1.1103 0.0978 0.062 Uiso 1 1 calc R U . . .
C19 C 0.62991(15) 1.0478(4) 0.20557(11) 0.0517(6) Uani 1 1 d . . . . .
H21 H 0.6125 1.1494 0.2304 0.062 Uiso 1 1 calc R U . . .
C20 C 0.70390(16) 1.0869(4) 0.19001(12) 0.0587(6) Uani 1 1 d . . . . .
H22 H 0.7358 1.2167 0.2042 0.070 Uiso 1 1 calc R U . . .
 
loop_
 _atom_site_aniso_label
 _atom_site_aniso_U_11
 _atom_site_aniso_U_22
 _atom_site_aniso_U_33
 _atom_site_aniso_U_23
 _atom_site_aniso_U_13
 _atom_site_aniso_U_12
S1 0.0436(3) 0.0526(4) 0.0370(3) 0.0002(2) 0.0162(2) -0.0033(2)
S2 0.0550(4) 0.1084(6) 0.0481(4) -0.0042(3) 0.0288(3) -0.0003(3)
O1 0.0471(10) 0.0810(13) 0.0540(10) -0.0069(9) -0.0016(8) 0.0085(8)
O2 0.0543(11) 0.0849(14) 0.0917(14) -0.0402(11) 0.0030(9) 0.0113(10)
O3 0.0649(11) 0.0895(13) 0.0421(9) -0.0169(8) 0.0228(8) -0.0012(9)
O4 0.0576(10) 0.0520(10) 0.0614(10) 0.0157(8) 0.0185(8) -0.0064(8)
N1 0.0383(10) 0.0392(10) 0.0442(10) -0.0024(8) 0.0170(8) -0.0022(8)
C1 0.0636(18) 0.133(3) 0.089(2) 0.013(2) 0.0419(17) -0.0121(18)
C2 0.0437(13) 0.0771(18) 0.0482(13) 0.0103(13) 0.0151(11) -0.0034(12)
C3 0.0516(14) 0.0749(17) 0.0516(14) -0.0063(12) 0.0240(11) 0.0074(13)
C4 0.0464(13) 0.0462(13) 0.0489(13) -0.0069(11) 0.0132(10) -0.0014(10)
C5 0.0380(11) 0.0402(11) 0.0371(11) -0.0026(9) 0.0113(9) -0.0024(9)
C6 0.0363(11) 0.0482(12) 0.0423(11) -0.0041(10) 0.0172(9) 0.0005(9)
C7 0.0378(11) 0.0459(13) 0.0406(11) 0.0031(9) 0.0129(9) 0.0039(9)
C8 0.0416(13) 0.0659(16) 0.0444(13) -0.0047(11) 0.0130(10) -0.0004(11)
C9 0.0690(19) 0.110(3) 0.0607(17) -0.0178(18) -0.0142(14) 0.0002(18)
C10 0.085(3) 0.143(4) 0.116(3) -0.041(3) 0.032(2) -0.039(2)
C11 0.0506(14) 0.0434(13) 0.0680(16) 0.0061(11) 0.0189(12) 0.0023(11)
C12 0.0655(17) 0.085(2) 0.0706(18) 0.0304(15) 0.0296(14) -0.0020(15)
C13 0.0333(11) 0.0434(13) 0.0442(12) -0.0050(10) 0.0120(9) -0.0032(9)
C14 0.0523(14) 0.0459(13) 0.0669(15) 0.0032(12) 0.0290(12) 0.0057(11)
C15 0.0613(16) 0.0630(16) 0.0659(16) 0.0118(13) 0.0299(13) -0.0040(13)
C16 0.0573(15) 0.0776(19) 0.0602(15) -0.0144(14) 0.0338(13) -0.0109(14)
C17 0.0612(16) 0.0608(16) 0.0778(17) -0.0144(14) 0.0358(14) 0.0046(13)
C18 0.0540(14) 0.0434(13) 0.0608(14) 0.0007(11) 0.0240(12) 0.0021(11)
C19 0.0504(13) 0.0485(14) 0.0535(13) -0.0110(11) 0.0155(11) -0.0038(11)
C20 0.0483(14) 0.0579(16) 0.0638(15) 0.0022(13) 0.0128(12) -0.0159(12)
 
_geom_special_details
;
 All esds (except the esd in the dihedral angle between two l.s. planes)
 are estimated using the full covariance matrix.  The cell esds are taken
 into account individually in the estimation of esds in distances, angles
 and torsion angles; correlations between esds in cell parameters are only
 used when they are defined by crystal symmetry.  An approximate (isotropic)
 treatment of cell esds is used for estimating esds involving l.s. planes.
;
 
loop_
 _geom_bond_atom_site_label_1
 _geom_bond_atom_site_label_2
 _geom_bond_distance
 _geom_bond_site_symmetry_2
 _geom_bond_publ_flag
S1 O3 1.4188(16) . ?
S1 O4 1.4249(16) . ?
S1 N1 1.6504(18) . ?
S1 C5 1.755(2) . ?
S2 C12 1.810(3) . ?
S2 C6 1.834(2) . ?
O1 C8 1.320(3) . ?
O1 C9 1.458(3) . ?
O2 C8 1.194(3) . ?
N1 C6 1.441(3) . ?
N1 C11 1.473(3) . ?
C1 C2 1.506(3) . ?
C1 H3 0.9600 . ?
C1 H23 0.9600 . ?
C1 H1 0.9600 . ?
C2 C20 1.375(4) . ?
C2 C3 1.382(3) . ?
C3 C4 1.377(3) . ?
C3 H4 0.9300 . ?
C4 C5 1.381(3) . ?
C4 H5 0.9300 . ?
C5 C19 1.385(3) . ?
C6 C7 1.548(3) . ?
C6 H6 0.9800 . ?
C7 C13 1.515(3) . ?
C7 C8 1.518(3) . ?
C7 H7 0.9800 . ?
C9 C10 1.498(4) . ?
C9 H14 0.9700 . ?
C9 H13 0.9700 . ?
C10 H15 0.9600 . ?
C10 H16 0.9600 . ?
C10 H2 0.9600 . ?
C11 C12 1.526(3) . ?
C11 H20 0.9700 . ?
C11 H19 0.9700 . ?
C12 H17 0.9700 . ?
C12 H18 0.9700 . ?
C13 C14 1.374(3) . ?
C13 C18 1.386(3) . ?
C14 C15 1.386(3) . ?
C14 H12 0.9300 . ?
C15 C16 1.365(3) . ?
C15 H8 0.9300 . ?
C16 C17 1.363(3) . ?
C16 H9 0.9300 . ?
C17 C18 1.377(3) . ?
C17 H11 0.9300 . ?
C18 H10 0.9300 . ?
C19 C20 1.379(3) . ?
C19 H21 0.9300 . ?
C20 H22 0.9300 . ?
 
loop_
 _geom_angle_atom_site_label_1
 _geom_angle_atom_site_label_2
 _geom_angle_atom_site_label_3
 _geom_angle
 _geom_angle_site_symmetry_1
 _geom_angle_site_symmetry_3
 _geom_angle_publ_flag
O3 S1 O4 120.07(10) . . ?
O3 S1 N1 106.26(9) . . ?
O4 S1 N1 106.14(9) . . ?
O3 S1 C5 106.89(10) . . ?
O4 S1 C5 108.61(10) . . ?
N1 S1 C5 108.41(9) . . ?
C12 S2 C6 92.33(11) . . ?
C8 O1 C9 116.9(2) . . ?
C6 N1 C11 108.92(16) . . ?
C6 N1 S1 119.85(13) . . ?
C11 N1 S1 117.03(14) . . ?
C2 C1 H3 109.5 . . ?
C2 C1 H23 109.5 . . ?
H3 C1 H23 109.5 . . ?
C2 C1 H1 109.5 . . ?
H3 C1 H1 109.5 . . ?
H23 C1 H1 109.5 . . ?
C20 C2 C3 118.4(2) . . ?
C20 C2 C1 120.2(2) . . ?
C3 C2 C1 121.4(2) . . ?
C4 C3 C2 121.2(2) . . ?
C4 C3 H4 119.4 . . ?
C2 C3 H4 119.4 . . ?
C3 C4 C5 119.7(2) . . ?
C3 C4 H5 120.1 . . ?
C5 C4 H5 120.1 . . ?
C4 C5 C19 119.8(2) . . ?
C4 C5 S1 120.84(16) . . ?
C19 C5 S1 119.32(16) . . ?
N1 C6 C7 111.23(16) . . ?
N1 C6 S2 106.54(13) . . ?
C7 C6 S2 109.66(14) . . ?
N1 C6 H6 109.8 . . ?
C7 C6 H6 109.8 . . ?
S2 C6 H6 109.8 . . ?
C13 C7 C8 110.29(17) . . ?
C13 C7 C6 114.43(16) . . ?
C8 C7 C6 107.90(17) . . ?
C13 C7 H7 108.0 . . ?
C8 C7 H7 108.0 . . ?
C6 C7 H7 108.0 . . ?
O2 C8 O1 123.7(2) . . ?
O2 C8 C7 125.5(2) . . ?
O1 C8 C7 110.8(2) . . ?
O1 C9 C10 113.0(3) . . ?
O1 C9 H14 109.0 . . ?
C10 C9 H14 109.0 . . ?
O1 C9 H13 109.0 . . ?
C10 C9 H13 109.0 . . ?
H14 C9 H13 107.8 . . ?
C9 C10 H15 109.5 . . ?
C9 C10 H16 109.5 . . ?
H15 C10 H16 109.5 . . ?
C9 C10 H2 109.5 . . ?
H15 C10 H2 109.5 . . ?
H16 C10 H2 109.5 . . ?
N1 C11 C12 108.41(19) . . ?
N1 C11 H20 110.0 . . ?
C12 C11 H20 110.0 . . ?
N1 C11 H19 110.0 . . ?
C12 C11 H19 110.0 . . ?
H20 C11 H19 108.4 . . ?
C11 C12 S2 107.39(17) . . ?
C11 C12 H17 110.2 . . ?
S2 C12 H17 110.2 . . ?
C11 C12 H18 110.2 . . ?
S2 C12 H18 110.2 . . ?
H17 C12 H18 108.5 . . ?
C14 C13 C18 118.1(2) . . ?
C14 C13 C7 122.32(19) . . ?
C18 C13 C7 119.60(19) . . ?
C13 C14 C15 121.1(2) . . ?
C13 C14 H12 119.5 . . ?
C15 C14 H12 119.5 . . ?
C16 C15 C14 119.8(2) . . ?
C16 C15 H8 120.1 . . ?
C14 C15 H8 120.1 . . ?
C17 C16 C15 120.0(2) . . ?
C17 C16 H9 120.0 . . ?
C15 C16 H9 120.0 . . ?
C16 C17 C18 120.4(2) . . ?
C16 C17 H11 119.8 . . ?
C18 C17 H11 119.8 . . ?
C17 C18 C13 120.6(2) . . ?
C17 C18 H10 119.7 . . ?
C13 C18 H10 119.7 . . ?
C20 C19 C5 119.4(2) . . ?
C20 C19 H21 120.3 . . ?
C5 C19 H21 120.3 . . ?
C2 C20 C19 121.5(2) . . ?
C2 C20 H22 119.3 . . ?
C19 C20 H22 119.3 . . ?
 
loop_
 _geom_torsion_atom_site_label_1
 _geom_torsion_atom_site_label_2
 _geom_torsion_atom_site_label_3
 _geom_torsion_atom_site_label_4
 _geom_torsion
 _geom_torsion_site_symmetry_1
 _geom_torsion_site_symmetry_2
 _geom_torsion_site_symmetry_3
 _geom_torsion_site_symmetry_4
 _geom_torsion_publ_flag
O3 S1 N1 C6 -158.06(14) . . . . ?
O4 S1 N1 C6 -29.17(17) . . . . ?
C5 S1 N1 C6 87.34(16) . . . . ?
O3 S1 N1 C11 66.50(17) . . . . ?
O4 S1 N1 C11 -164.62(14) . . . . ?
C5 S1 N1 C11 -48.10(17) . . . . ?
C20 C2 C3 C4 -0.3(4) . . . . ?
C1 C2 C3 C4 180.0(2) . . . . ?
C2 C3 C4 C5 0.3(4) . . . . ?
C3 C4 C5 C19 -0.5(3) . . . . ?
C3 C4 C5 S1 178.84(17) . . . . ?
O3 S1 C5 C4 159.51(18) . . . . ?
O4 S1 C5 C4 28.6(2) . . . . ?
N1 S1 C5 C4 -86.31(19) . . . . ?
O3 S1 C5 C19 -21.2(2) . . . . ?
O4 S1 C5 C19 -152.08(17) . . . . ?
N1 S1 C5 C19 93.01(19) . . . . ?
C11 N1 C6 C7 -79.1(2) . . . . ?
S1 N1 C6 C7 142.27(15) . . . . ?
C11 N1 C6 S2 40.38(18) . . . . ?
S1 N1 C6 S2 -98.26(14) . . . . ?
C12 S2 C6 N1 -22.01(16) . . . . ?
C12 S2 C6 C7 98.47(16) . . . . ?
N1 C6 C7 C13 -48.1(2) . . . . ?
S2 C6 C7 C13 -165.72(15) . . . . ?
N1 C6 C7 C8 -171.29(17) . . . . ?
S2 C6 C7 C8 71.12(19) . . . . ?
C9 O1 C8 O2 0.5(4) . . . . ?
C9 O1 C8 C7 179.8(2) . . . . ?
C13 C7 C8 O2 -109.9(3) . . . . ?
C6 C7 C8 O2 15.8(3) . . . . ?
C13 C7 C8 O1 70.8(2) . . . . ?
C6 C7 C8 O1 -163.54(18) . . . . ?
C8 O1 C9 C10 73.7(4) . . . . ?
C6 N1 C11 C12 -42.5(2) . . . . ?
S1 N1 C11 C12 97.50(19) . . . . ?
N1 C11 C12 S2 24.2(2) . . . . ?
C6 S2 C12 C11 -1.36(18) . . . . ?
C8 C7 C13 C14 60.1(3) . . . . ?
C6 C7 C13 C14 -61.8(3) . . . . ?
C8 C7 C13 C18 -119.1(2) . . . . ?
C6 C7 C13 C18 119.1(2) . . . . ?
C18 C13 C14 C15 1.5(3) . . . . ?
C7 C13 C14 C15 -177.7(2) . . . . ?
C13 C14 C15 C16 -0.4(4) . . . . ?
C14 C15 C16 C17 -0.9(4) . . . . ?
C15 C16 C17 C18 1.2(4) . . . . ?
C16 C17 C18 C13 -0.1(4) . . . . ?
C14 C13 C18 C17 -1.2(3) . . . . ?
C7 C13 C18 C17 178.0(2) . . . . ?
C4 C5 C19 C20 0.7(3) . . . . ?
S1 C5 C19 C20 -178.62(18) . . . . ?
C3 C2 C20 C19 0.6(4) . . . . ?
C1 C2 C20 C19 -179.7(2) . . . . ?
C5 C19 C20 C2 -0.8(4) . . . . ?
 
_refine_diff_density_max    0.303
_refine_diff_density_min   -0.262
_refine_diff_density_rms    0.043

_shelxl_version_number 2013-4

_shelx_res_file
;
TITL TKC_HK_384_0m in P2(1)/n
CELL 0.71073 16.1887 6.0567 21.9208 90.000 111.150 90.000
ZERR 4.00 0.0015 0.0006 0.0020 0.000 0.003 0.000
LATT 1
SYMM -x+1/2, y+1/2, -z+1/2
SFAC C H N O S
UNIT 80 92 4 16 8
TEMP 0.000
ACTA
L.S. 10
FMAP 2
PLAN 5
HTAB
BOND $H
CONF
WGHT    0.100000
FVAR       0.12730
S1    5    0.486202    0.809087    0.202135    11.00000    0.04360    0.05257 =
         0.03698    0.00018    0.01619   -0.00334
S2    5    0.398580    0.834587    0.021799    11.00000    0.05505    0.10844 =
         0.04812   -0.00421    0.02880   -0.00027
O1    4    0.128888    0.673810   -0.025785    11.00000    0.04712    0.08095 =
         0.05402   -0.00690   -0.00164    0.00846
O2    4    0.246409    0.454685    0.002418    11.00000    0.05434    0.08489 =
         0.09170   -0.04025    0.00298    0.01131
O3    4    0.493487    0.942979    0.256950    11.00000    0.06493    0.08946 =
         0.04206   -0.01693    0.02276   -0.00117
O4    4    0.473469    0.576934    0.204584    11.00000    0.05765    0.05197 =
         0.06145    0.01571    0.01846   -0.00636
N1    3    0.399866    0.902667    0.140871    11.00000    0.03834    0.03922 =
         0.04421   -0.00245    0.01703   -0.00220
C1    1    0.812900    0.985173    0.138040    11.00000    0.06357    0.13312 =
         0.08908    0.01301    0.04186   -0.01211
AFIX 137
H3    2    0.825016    1.140757    0.141842    11.00000   -1.50000
H23   2    0.803029    0.938116    0.094146    11.00000   -1.50000
H1    2    0.862490    0.906542    0.167965    11.00000   -1.50000
AFIX   0
C2    1    0.731600    0.938284    0.153983    11.00000    0.04370    0.07713 =
         0.04824    0.01032    0.01512   -0.00337
C3    1    0.682950    0.747335    0.132848    11.00000    0.05165    0.07491 =
         0.05160   -0.00632    0.02398    0.00738
AFIX  43
H4    2    0.700690    0.645579    0.108246    11.00000   -1.20000
AFIX   0
C4    1    0.608687    0.705069    0.147566    11.00000    0.04643    0.04625 =
         0.04894   -0.00689    0.01320   -0.00143
AFIX  43
H5    2    0.576795    0.575467    0.133141    11.00000   -1.20000
AFIX   0
C5    1    0.581731    0.855823    0.183825    11.00000    0.03795    0.04017 =
         0.03708   -0.00264    0.01134   -0.00238
C6    1    0.355437    0.761533    0.085846    11.00000    0.03630    0.04821 =
         0.04232   -0.00410    0.01720    0.00053
AFIX  13
H6    2    0.368977    0.606671    0.098446    11.00000   -1.20000
AFIX   0
C7    1    0.253959    0.797951    0.060312    11.00000    0.03780    0.04585 =
         0.04056    0.00305    0.01293    0.00390
AFIX  13
H7    2    0.241374    0.941368    0.038161    11.00000   -1.20000
AFIX   0
C8    1    0.211252    0.620302    0.009939    11.00000    0.04165    0.06590 =
         0.04435   -0.00472    0.01296   -0.00044
C9    1    0.079548    0.518013   -0.076541    11.00000    0.06898    0.10988 =
         0.06070   -0.01781   -0.01417    0.00021
AFIX  23
H14   2    0.115960    0.474758   -0.101282    11.00000   -1.20000
H13   2    0.027173    0.590800   -0.106382    11.00000   -1.20000
AFIX   0
C10   1    0.051944    0.315172   -0.049721    11.00000    0.08501    0.14280 =
         0.11573   -0.04142    0.03212   -0.03900
AFIX 137
H15   2    0.103481    0.230866   -0.025249    11.00000   -1.50000
H16   2    0.013759    0.227330   -0.085137    11.00000   -1.50000
H2    2    0.020904    0.357335   -0.021589    11.00000   -1.50000
AFIX   0
C11   1    0.407063    1.126066    0.116712    11.00000    0.05058    0.04341 =
         0.06799    0.00605    0.01887    0.00227
AFIX  23
H20   2    0.451331    1.210508    0.150509    11.00000   -1.20000
H19   2    0.350752    1.202185    0.105097    11.00000   -1.20000
AFIX   0
C12   1    0.433460    1.105025    0.056792    11.00000    0.06547    0.08544 =
         0.07063    0.03040    0.02959   -0.00200
AFIX  23
H17   2    0.497078    1.120733    0.069350    11.00000   -1.20000
H18   2    0.404834    1.219077    0.025159    11.00000   -1.20000
AFIX   0
C13   1    0.214008    0.797752    0.113048    11.00000    0.03330    0.04337 =
         0.04416   -0.00504    0.01198   -0.00318
C14   1    0.217840    0.616576    0.151713    11.00000    0.05228    0.04591 =
         0.06687    0.00321    0.02900    0.00568
AFIX  43
H12   2    0.247655    0.490660    0.146703    11.00000   -1.20000
AFIX   0
C15   1    0.178007    0.618439    0.198038    11.00000    0.06135    0.06304 =
         0.06589    0.01180    0.02987   -0.00399
AFIX  43
H8    2    0.180834    0.494253    0.223667    11.00000   -1.20000
AFIX   0
C16   1    0.134606    0.803148    0.205934    11.00000    0.05728    0.07756 =
         0.06018   -0.01441    0.03377   -0.01088
AFIX  43
H9    2    0.107065    0.804171    0.236542    11.00000   -1.20000
AFIX   0
C17   1    0.131604    0.986044    0.168999    11.00000    0.06120    0.06080 =
         0.07780   -0.01436    0.03578    0.00458
AFIX  43
H11   2    0.102900    1.112512    0.175063    11.00000   -1.20000
AFIX   0
C18   1    0.170837    0.984664    0.122741    11.00000    0.05402    0.04344 =
         0.06076    0.00074    0.02399    0.00211
AFIX  43
H10   2    0.168351    1.110331    0.097760    11.00000   -1.20000
AFIX   0
C19   1    0.629908    1.047820    0.205574    11.00000    0.05035    0.04855 =
         0.05346   -0.01099    0.01552   -0.00384
AFIX  43
H21   2    0.612521    1.149362    0.230427    11.00000   -1.20000
AFIX   0
C20   1    0.703900    1.086893    0.190011    11.00000    0.04833    0.05786 =
         0.06375    0.00222    0.01275   -0.01592
AFIX  43
H22   2    0.735772    1.216661    0.204202    11.00000   -1.20000
AFIX   0
HKLF 4 1 1 0 0 0 1 0 0 0 1

REM  TKC_HK_384_0m in P2(1)/n
REM R1 =  0.0470 for    2953 Fo > 4sig(Fo)  and  0.0918 for all    4616 data
REM    246 parameters refined using      0 restraints

END

WGHT      0.0576      0.6044

REM Instructions for potential hydrogen bonds
HTAB C6 O4
HTAB C10 O2
EQIV $1 x, y+1, z
HTAB C11 O4_$1

REM Highest difference peak  0.303,  deepest hole -0.262,  1-sigma level  0.043
Q1    1   0.4014  1.0102  0.1363  11.00000  0.05    0.30
Q2    1   0.4413  0.8527  0.1651  11.00000  0.05    0.28
Q3    1  -0.0042  0.6293 -0.0907  11.00000  0.05    0.25
Q4    1   0.5373  0.8410  0.1919  11.00000  0.05    0.24
Q5    1   0.3039  0.7706  0.0732  11.00000  0.05    0.24
;
_shelx_res_checksum   84265

_shelx_hkl_file
;
  -3   0   0    0.00    0.03
  -3   0   0    0.06    0.04
  -3   0   0   -0.14    0.05
  -3   0   0    0.13    0.04
  -3   0   0    0.00    0.05
   3   0   0    0.01    0.06
   3   0   0    0.04    0.04
   3   0   0   -0.03    0.04
   3   0   0   -0.04    0.03
   3   0   0   -0.02    0.04
  -4   0   0    5.16    0.22
  -4   0   0    4.95    0.18
  -4   0   0    4.77    0.23
  -4   0   0    5.11    0.19
  -4   0   0    5.24    0.24
   4   0   0    5.05    0.24
   4   0   0    5.20    0.20
   4   0   0    4.90    0.19
  -5   0   0   -0.07    0.04
  -5   0   0   -0.03    0.08
  -5   0   0   -0.02    0.07
  -5   0   0    0.03    0.05
  -5   0   0   -0.16    0.09
   5   0   0    0.01    0.06
   5   0   0   -0.04    0.08
   5   0   0   -0.01    0.06
   5   0   0   -0.01    0.08
   5   0   0   -0.04    0.06
  -6   0   0    8.57    0.38
  -6   0   0    8.49    0.29
  -6   0   0    7.98    0.34
   6   0   0    8.49    0.31
   6   0   0    8.64    0.32
   6   0   0    8.29    0.37
   6   0   0    8.58    0.38
  -7   0   0    0.05    0.10
  -7   0   0   -0.09    0.08
  -7   0   0   -0.09    0.07
  -7   0   0   -0.29    0.14
   7   0   0   -0.11    0.08
   7   0   0    0.07    0.10
   7   0   0    0.00    0.12
   7   0   0    0.13    0.11
  -8   0   0   79.81    2.07
  -8   0   0   80.70    2.21
  -8   0   0   80.31    2.16
  -8   0   0   79.95    2.07
   8   0   0   79.74    2.22
   8   0   0   80.61    2.13
   8   0   0   81.86    2.22
   8   0   0   81.51    2.12
  -9   0   0    0.04    0.09
  -9   0   0    0.14    0.21
  -9   0   0   -0.01    0.10
  -9   0   0   -0.16    0.13
   9   0   0   -0.04    0.17
   9   0   0   -0.35    0.15
   9   0   0    0.16    0.14
 -10   0   0   44.20    1.34
 -10   0   0   42.90    1.41
 -10   0   0   44.49    1.23
  10   0   0   42.77    1.35
  10   0   0   41.93    1.36
  10   0   0   43.18    1.23
  10   0   0   43.42    1.37
  10   0   0   43.99    1.27
 -11   0   0    0.29    0.20
 -11   0   0    0.00    0.13
 -11   0   0    0.15    0.14
 -11   0   0   -0.06    0.27
  11   0   0    0.11    0.23
  11   0   0    0.03    0.16
  11   0   0    0.06    0.20
  11   0   0   -0.35    0.20
  11   0   0   -0.26    0.24
 -12   0   0    2.34    0.25
 -12   0   0    2.50    0.27
 -12   0   0    2.31    0.35
  12   0   0    2.05    0.34
  12   0   0    1.80    0.26
  12   0   0    2.10    0.34
  12   0   0    2.23    0.30
  12   0   0    1.74    0.33
 -13   0   0   -0.12    0.16
 -13   0   0   -0.20    0.27
 -13   0   0    0.09    0.17
  13   0   0   -0.34    0.35
  13   0   0    0.19    0.28
  13   0   0    0.14    0.22
  13   0   0    0.22    0.31
 -14   0   0    0.04    0.18
 -14   0   0   -0.20    0.27
 -14   0   0    0.10    0.19
  14   0   0    0.39    0.35
  14   0   0    0.07    0.35
  14   0   0    0.34    0.25
 -15   0   0    0.54    0.22
 -15   0   0    0.13    0.20
 -15   0   0    0.24    0.35
  15   0   0   -0.31    0.35
  15   0   0    0.08    0.42
  15   0   0   -0.13    0.27
 -16   0   0    0.14    0.38
 -16   0   0   -0.01    0.26
  16   0   0   -0.10    0.34
  16   0   0    0.19    0.52
  16   0   0    0.29    0.46
 -17   0   0   -0.09    0.29
 -17   0   0   -0.34    0.45
  17   0   0    0.13    0.53
  17   0   0    0.10    0.35
  17   0   0   -0.23    0.52
 -18   0   0    0.15    0.35
 -18   0   0   -1.23    0.51
  18   0   0    0.22    0.61
  18   0   0   -0.01    0.60
 -19   0   0    0.18    0.60
 -19   0   0    0.09    0.37
  19   0   0   -0.97    0.69
  19   0   0   -1.64    0.64
  19  -1   0   -0.61    0.72
  19  -1   0   -0.01    0.77
 -19   1   0   -0.03    0.41
 -19   1   0    0.04    0.63
  18  -1   0    0.11    0.61
  18  -1   0    0.64    0.69
 -18   1   0   -0.21    0.34
 -18   1   0    0.32    0.57
  17  -1   0    0.59    0.58
  17  -1   0   -0.28    0.56
 -17   1   0    0.75    0.47
 -17   1   0   -0.15    0.30
  16  -1   0    0.71    0.55
  16  -1   0   -0.34    0.45
 -16   1   0    0.46    0.38
 -16   1   0    0.41    0.28
  15  -1   0   -0.28    0.44
  15  -1   0    0.12    0.18
 -15   1   0   -0.13    0.23
 -15   1   0   -0.10    0.31
  14  -1   0    5.68    0.71
  14  -1   0    6.00    0.56
  14  -1   0    5.62    0.32
 -14   1   0    5.20    0.26
 -14   1   0    5.83    0.43
  13  -1   0    2.85    0.26
  13  -1   0    3.40    0.44
  13  -1   0    3.79    0.51
  13  -1   0    4.35    0.45
 -13   1   0    3.26    0.43
 -13   1   0    3.41    0.34
 -13   1   0    2.89    0.20
  12  -1   0   11.83    0.66
  12  -1   0   12.06    0.58
  12  -1   0   11.76    0.75
  12  -1   0   12.44    0.43
 -12   1   0   11.96    0.49
 -12   1   0   11.43    0.38
 -12   1   0   11.45    0.63
  11  -1   0    3.02    0.37
  11  -1   0    2.52    0.36
  11  -1   0    2.63    0.30
  11  -1   0    2.79    0.21
 -11   1   0    2.30    0.32
 -11   1   0    2.56    0.26
 -11   1   0    2.36    0.16
 -11   1   0    2.59    0.45
  10  -1   0    5.81    0.51
  10  -1   0    6.14    0.26
  10  -1   0    6.16    0.44
  10  -1   0    5.74    0.33
 -10   1   0    5.91    0.44
 -10   1   0    5.58    0.22
 -10   1   0    6.03    0.31
 -10   1   0    5.09    0.50
   9  -1   0   43.56    1.33
   9  -1   0   42.02    1.13
   9  -1   0   43.82    1.37
   9  -1   0   42.59    1.39
   9  -1   0   42.83    1.20
  -9   1   0   40.71    1.09
  -9   1   0   43.22    1.31
  -9   1   0   44.17    1.45
  -9   1   0   42.21    1.18
   8  -1   0   15.78    0.68
   8  -1   0   16.15    0.53
   8  -1   0   16.47    0.63
   8  -1   0   15.82    0.46
  -8   1   0   16.00    0.52
  -8   1   0   16.01    0.63
  -8   1   0   15.70    0.44
  -8   1   0   16.50    0.77
   7  -1   0   21.66    0.60
   7  -1   0   22.87    0.75
   7  -1   0   22.56    0.80
   7  -1   0   21.79    0.67
  -7   1   0   22.80    0.60
  -7   1   0   22.50    0.67
  -7   1   0   23.31    0.77
   6  -1   0    0.23    0.11
   6  -1   0    0.02    0.13
   6  -1   0    0.10    0.04
   6  -1   0    0.05    0.06
  -6   1   0    0.08    0.12
  -6   1   0    0.11    0.04
  -6   1   0    0.01    0.15
  -6   1   0    0.03    0.10
   5  -1   0    7.34    0.21
   5  -1   0    6.82    0.36
   5  -1   0    7.43    0.25
   5  -1   0    6.94    0.31
  -5   1   0    7.04    0.21
  -5   1   0    7.82    0.37
  -5   1   0    7.66    0.33
  -5   1   0    7.23    0.26
   4  -1   0   78.54    2.03
   4  -1   0   82.06    1.96
   4  -1   0   74.49    2.03
   4  -1   0   78.35    1.94
  -4   1   0   77.24    2.01
  -4   1   0   78.12    1.94
  -4   1   0   76.53    2.06
  -4   1   0   77.41    1.92
   3  -1   0    2.73    0.10
   3  -1   0    2.84    0.13
   3  -1   0    2.63    0.16
   3  -1   0    2.89    0.16
   3  -1   0    2.67    0.11
   3  -1   0    2.50    0.18
  -3   1   0    2.82    0.13
  -3   1   0    2.74    0.16
  -3   1   0    2.41    0.18
  -3   1   0    2.67    0.16
   2  -1   0   13.62    0.46
   2  -1   0   15.97    0.50
   2  -1   0   16.71    0.45
   2  -1   0   16.75    0.44
   2  -1   0   17.39    0.49
  -2   1   0   16.80    0.53
  -2   1   0   16.95    0.50
  -2   1   0   16.43    0.49
  -2   1   0   17.16    0.46
  -2   1   0   16.71    0.47
   1  -1   0  275.81    6.67
   1  -1   0  267.30    6.66
   1  -1   0  281.23    6.61
   1  -1   0  261.49    6.68
  -1   1   0  262.68    6.50
  -1   1   0  277.08    6.58
  -1   1   0  266.21    6.56
  -1   1   0  261.80    6.57
   0  -1   0   -0.06    0.04
   0  -1   0    0.05    0.04
   0  -1   0    0.01    0.03
   0  -1   0    0.00    0.05
   0  -1   0   -0.03    0.03
   0   1   0   -0.03    0.04
   0   1   0   -0.05    0.03
   0   1   0    0.06    0.04
   0   1   0   -0.01    0.04
  -1  -1   0  285.71    6.59
  -1  -1   0  269.08    6.68
  -1  -1   0  250.57    6.59
  -1  -1   0  274.02    6.63
   1   1   0  280.21    6.72
   1   1   0  270.54    6.74
   1   1   0  273.01    6.75
  -2  -1   0   16.64    0.50
  -2  -1   0   15.83    0.49
  -2  -1   0   17.29    0.49
   2   1   0   17.87    0.53
   2   1   0   16.63    0.51
   2   1   0   17.06    0.52
   2   1   0   17.29    0.51
  -3  -1   0    2.75    0.11
  -3  -1   0    2.94    0.17
  -3  -1   0    2.77    0.16
   3   1   0    2.70    0.16
   3   1   0    2.75    0.10
   3   1   0    2.57    0.18
   3   1   0    2.53    0.17
   3   1   0    2.86    0.17
  -4  -1   0   75.34    1.99
  -4  -1   0   74.66    1.95
  -4  -1   0   76.89    1.99
  -4  -1   0   76.92    1.91
   4   1   0   81.40    2.04
   4   1   0   76.97    1.96
   4   1   0   78.72    2.05
   4   1   0   75.17    2.01
  -5  -1   0    7.31    0.33
  -5  -1   0    7.06    0.30
  -5  -1   0    7.34    0.27
  -5  -1   0    7.52    0.32
   5   1   0    6.95    0.33
   5   1   0    7.23    0.27
   5   1   0    6.93    0.30
   5   1   0    7.14    0.32
  -6  -1   0    0.18    0.11
  -6  -1   0    0.03    0.10
  -6  -1   0    0.03    0.09
  -6  -1   0    0.05    0.12
   6   1   0    0.14    0.10
   6   1   0    0.03    0.07
   6   1   0    0.04    0.11
   6   1   0    0.05    0.11
   6   1   0    0.15    0.09
  -7  -1   0   23.70    0.73
  -7  -1   0   22.27    0.79
  -7  -1   0   23.34    0.73
  -7  -1   0   21.33    0.72
  -7  -1   0   23.22    0.73
   7   1   0   23.21    0.74
   7   1   0   22.57    0.70
   7   1   0   22.86    0.75
   7   1   0   22.79    0.77
   7   1   0   22.28    0.75
  -8  -1   0   16.16    0.59
  -8  -1   0   17.43    0.62
  -8  -1   0   16.64    0.59
  -8  -1   0   17.50    0.63
   8   1   0   15.90    0.58
   8   1   0   16.35    0.65
   8   1   0   16.48    0.61
   8   1   0   15.55    0.60
  -9  -1   0   41.08    1.25
  -9  -1   0   42.93    1.21
  -9  -1   0   41.60    1.21
  -9  -1   0   40.37    1.24
   9   1   0   41.68    1.27
   9   1   0   42.53    1.31
   9   1   0   43.13    1.26
   9   1   0   39.18    1.25
   9   1   0   41.67    1.23
 -10  -1   0    5.78    0.35
 -10  -1   0    5.66    0.44
 -10  -1   0    6.05    0.36
 -10  -1   0    6.16    0.37
  10   1   0    5.94    0.40
  10   1   0    5.75    0.42
  10   1   0    5.58    0.39
  10   1   0    4.65    0.39
  10   1   0    5.55    0.39
 -11  -1   0    2.64    0.36
 -11  -1   0    2.55    0.28
 -11  -1   0    2.76    0.34
 -11  -1   0    3.30    0.31
  11   1   0    2.81    0.35
  11   1   0    2.45    0.30
  11   1   0    2.75    0.30
  11   1   0    2.71    0.37
  11   1   0    2.61    0.35
 -12  -1   0   12.31    0.62
 -12  -1   0   11.49    0.56
 -12  -1   0   11.61    0.53
  12   1   0   11.19    0.61
  12   1   0   11.29    0.71
  12   1   0   11.92    0.65
  12   1   0   10.89    0.58
  12   1   0   12.74    0.62
 -13  -1   0    3.59    0.42
 -13  -1   0    3.58    0.37
 -13  -1   0    3.84    0.46
  13   1   0    3.17    0.40
  13   1   0    3.46    0.41
  13   1   0    3.43    0.47
  13   1   0    3.35    0.42
 -14  -1   0    4.15    0.42
 -14  -1   0    5.79    0.56
 -14  -1   0    5.91    0.43
  14   1   0    6.03    0.56
  14   1   0    5.80    0.58
  14   1   0    6.11    0.59
  14   1   0    4.79    0.51
 -15  -1   0    0.04    0.31
 -15  -1   0   -0.20    0.22
 -15  -1   0   -0.52    0.33
  15   1   0   -0.29    0.33
  15   1   0   -0.04    0.38
  15   1   0   -0.63    0.33
  15   1   0    0.37    0.43
 -16  -1   0    0.21    0.28
 -16  -1   0    0.20    0.40
  16   1   0    0.00    0.45
  16   1   0   -0.12    0.41
  16   1   0    0.39    0.40
 -17  -1   0    0.25    0.33
 -17  -1   0   -0.68    0.44
  17   1   0   -1.66    0.55
  17   1   0    0.20    0.46
  17   1   0    0.59    0.49
 -18  -1   0   -0.74    0.49
 -18  -1   0   -0.16    0.33
  18   1   0   -0.59    0.64
  18   1   0   -0.29    0.51
  18   1   0    0.00    0.54
 -19  -1   0   -0.51    0.59
 -19  -1   0    0.21    0.38
  19   1   0   -0.23    0.71
  19   1   0   -0.19    0.63
  18  -2   0   -0.15    0.75
  18  -2   0    0.77    0.71
 -18   2   0    0.53    0.64
 -18   2   0    0.95    0.45
  17  -2   0   -0.53    0.67
  17  -2   0   -1.08    0.58
 -17   2   0    0.21    0.37
 -17   2   0   -0.21    0.46
  16  -2   0    0.70    0.57
  16  -2   0    0.16    0.52
 -16   2   0    0.41    0.32
 -16   2   0    0.22    0.46
  15  -2   0    0.10    0.53
  15  -2   0    0.56    0.45
 -15   2   0    0.04    0.41
 -15   2   0    0.01    0.27
  14  -2   0    0.28    0.43
  14  -2   0    0.22    0.30
 -14   2   0    0.13    0.24
 -14   2   0    0.35    0.34
  13  -2   0    5.28    0.62
  13  -2   0    6.74    0.63
 -13   2   0    5.18    0.42
  12  -2   0    0.18    0.30
  12  -2   0    0.28    0.35
 -12   2   0   -0.02    0.26
 -12   2   0    0.30    0.21
  11  -2   0    6.24    0.38
  11  -2   0    6.41    0.60
  11  -2   0    6.79    0.52
 -11   2   0    7.13    0.52
 -11   2   0    6.76    0.41
  10  -2   0    2.13    0.40
  10  -2   0    2.01    0.29
  10  -2   0    2.31    0.24
 -10   2   0    2.24    0.31
 -10   2   0    1.95    0.23
   9  -2   0    3.96    0.27
   9  -2   0    4.49    0.39
   9  -2   0    4.08    0.45
  -9   2   0    4.18    0.29
  -9   2   0    4.24    0.52
  -9   2   0    4.50    0.41
  -9   2   0    4.06    0.42
   8  -2   0    3.67    0.33
   8  -2   0    3.97    0.45
   8  -2   0    3.70    0.24
  -8   2   0    3.53    0.27
  -8   2   0    4.18    0.37
  -8   2   0    3.88    0.35
   7  -2   0   13.51    0.56
   7  -2   0   13.76    0.65
   7  -2   0   13.74    0.46
   7  -2   0   13.25    0.37
   7  -2   0   13.98    0.58
   7  -2   0   13.73    0.39
  -7   2   0   12.49    0.48
  -7   2   0   12.85    0.56
  -7   2   0   13.77    0.58
   6  -2   0    0.37    0.10
   6  -2   0    0.31    0.15
   6  -2   0    0.13    0.18
   6  -2   0    0.24    0.05
   6  -2   0    0.29    0.07
  -6   2   0    0.20    0.16
  -6   2   0    0.24    0.11
  -6   2   0    0.19    0.15
   5  -2   0    0.24    0.17
   5  -2   0    0.16    0.06
   5  -2   0    0.14    0.12
   5  -2   0    0.42    0.08
   5  -2   0    0.31    0.10
   5  -2   0    0.19    0.13
   5  -2   0    0.33    0.15
  -5   2   0    0.19    0.13
  -5   2   0    0.20    0.10
  -5   2   0    0.22    0.14
   4  -2   0   10.72    0.43
   4  -2   0   10.66    0.35
   4  -2   0   10.29    0.48
   4  -2   0    9.59    0.45
   4  -2   0    9.98    0.41
   4  -2   0   10.81    0.35
  -4   2   0   10.36    0.41
  -4   2   0   10.44    0.45
  -4   2   0    9.93    0.39
   3  -2   0    2.84    0.19
   3  -2   0    3.07    0.22
   3  -2   0    3.07    0.28
   3  -2   0    2.89    0.20
   3  -2   0    2.66    0.24
   3  -2   0    2.95    0.17
  -3   2   0    3.09    0.23
  -3   2   0    2.63    0.17
  -3   2   0    2.66    0.25
  -3   2   0    2.89    0.21
  -3   2   0    2.97    0.21
   2  -2   0   12.91    0.44
   2  -2   0   13.15    0.47
   2  -2   0   12.92    0.43
   2  -2   0   13.03    0.44
   2  -2   0   12.71    0.44
  -2   2   0   12.33    0.42
  -2   2   0   13.04    0.48
  -2   2   0   12.83    0.48
   1  -2   0    1.94    0.18
   1  -2   0    2.08    0.19
   1  -2   0    2.22    0.18
   1  -2   0    2.37    0.18
   1  -2   0    2.05    0.17
   1  -2   0    2.25    0.16
  -1   2   0    1.96    0.15
  -1   2   0    2.18    0.16
   0  -2   0    1.52    0.14
   0  -2   0    1.59    0.16
   0  -2   0    1.53    0.14
   0  -2   0    1.58    0.17
   0  -2   0    1.33    0.17
   0  -2   0    1.64    0.14
   0   2   0    1.44    0.17
   0   2   0    1.31    0.13
  -1  -2   0    2.06    0.19
  -1  -2   0    2.07    0.16
  -1  -2   0    1.86    0.14
  -1  -2   0    2.00    0.22
  -1  -2   0    2.21    0.13
   1   2   0    2.19    0.16
   1   2   0    2.16    0.19
   1   2   0    2.02    0.18
  -2  -2   0   12.75    0.37
  -2  -2   0   12.92    0.48
  -2  -2   0   12.92    0.49
  -2  -2   0   13.02    0.38
  -2  -2   0   13.44    0.50
  -2  -2   0   13.05    0.44
   2   2   0   12.91    0.46
   2   2   0   13.72    0.49
  -3  -2   0    3.04    0.10
  -3  -2   0    2.97    0.11
  -3  -2   0    2.49    0.21
  -3  -2   0    3.21    0.23
  -3  -2   0    2.95    0.21
   3   2   0    2.57    0.23
   3   2   0    3.23    0.25
  -4  -2   0   10.69    0.43
  -4  -2   0   10.38    0.42
   4   2   0   10.00    0.42
   4   2   0   10.04    0.46
   4   2   0    9.89    0.42
   4   2   0   11.00    0.48
  -5  -2   0    0.29    0.13
  -5  -2   0    0.01    0.12
  -5  -2   0    0.22    0.15
  -5  -2   0    0.23    0.05
  -5  -2   0    0.21    0.14
   5   2   0    0.08    0.03
   5   2   0    0.21    0.12
   5   2   0    0.40    0.16
   5   2   0    0.00    0.13
   5   2   0   -0.02    0.12
  -6  -2   0    0.13    0.14
  -6  -2   0    0.30    0.13
  -6  -2   0    0.31    0.08
  -6  -2   0    0.32    0.17
   6   2   0    0.15    0.15
   6   2   0    0.20    0.14
   6   2   0    0.37    0.15
   6   2   0    0.23    0.05
  -7  -2   0   12.89    0.52
  -7  -2   0   13.98    0.57
  -7  -2   0   13.42    0.43
  -7  -2   0   13.11    0.57
   7   2   0   13.40    0.57
   7   2   0   12.57    0.40
   7   2   0   13.20    0.41
   7   2   0   13.92    0.60
   7   2   0   12.95    0.56
  -8  -2   0    3.85    0.35
  -8  -2   0    4.54    0.34
  -8  -2   0    3.51    0.36
   8   2   0    3.66    0.36
   8   2   0    3.31    0.33
   8   2   0    4.28    0.34
   8   2   0    3.97    0.22
   8   2   0    3.69    0.21
  -9  -2   0    4.47    0.38
  -9  -2   0    4.73    0.41
  -9  -2   0    3.80    0.34
   9   2   0    4.72    0.42
   9   2   0    4.20    0.26
   9   2   0    3.54    0.36
   9   2   0    4.36    0.46
   9   2   0    3.84    0.38
   9   2   0    4.31    0.25
 -10  -2   0    1.53    0.24
 -10  -2   0    1.27    0.25
 -10  -2   0    2.18    0.30
  10   2   0    1.81    0.32
  10   2   0    1.89    0.32
  10   2   0    1.78    0.21
  10   2   0    1.94    0.21
 -11  -2   0    7.25    0.50
 -11  -2   0    6.43    0.48
 -11  -2   0    6.26    0.47
  11   2   0    6.43    0.40
  11   2   0    6.01    0.52
  11   2   0    6.40    0.56
  11   2   0    6.56    0.41
 -12  -2   0   -0.24    0.30
 -12  -2   0    0.15    0.22
 -12  -2   0    0.23    0.23
  12   2   0    0.07    0.20
  12   2   0    0.41    0.22
  12   2   0   -0.01    0.34
  12   2   0    0.48    0.30
 -13  -2   0    4.59    0.46
 -13  -2   0    6.98    0.50
 -13  -2   0    6.48    0.59
  13   2   0    5.40    0.59
  13   2   0    5.20    0.46
  13   2   0    5.60    0.63
  13   2   0    4.86    0.47
 -14  -2   0    0.27    0.31
 -14  -2   0   -0.06    0.31
  14   2   0    0.30    0.37
  14   2   0    0.31    0.43
  14   2   0    0.12    0.28
  14   2   0    0.09    0.30
 -15  -2   0    0.13    0.33
  15   2   0    0.19    0.44
  15   2   0   -0.03    0.43
  15   2   0    0.40    0.31
 -16  -2   0   -0.04    0.38
 -16  -2   0    0.32    0.35
  16   2   0   -0.02    0.34
  16   2   0    0.19    0.47
  16   2   0    0.13    0.44
 -17  -2   0   -0.06    0.38
 -17  -2   0    0.52    0.46
  17   2   0    0.80    0.56
  17   2   0    0.43    0.61
  17   2   0   -0.39    0.43
 -18  -2   0   -0.59    0.41
 -18  -2   0   -0.73    0.53
  18   2   0   -0.29    0.67
 -19  -2   0   -0.42    0.46
  18  -3   0    0.29    0.92
  18  -3   0    0.21    0.78
 -18   3   0   -1.05    0.74
  17  -3   0   -0.15    0.78
  17  -3   0   -1.04    0.67
 -17   3   0   -0.46    0.64
  16  -3   0   -0.12    0.52
  16  -3   0    0.83    0.72
 -16   3   0    0.20    0.42
 -16   3   0   -0.02    0.54
  15  -3   0    0.82    0.62
  15  -3   0    0.39    0.48
 -15   3   0    0.54    0.50
 -15   3   0   -0.25    0.34
  14  -3   0    1.63    0.61
  14  -3   0    1.52    0.46
 -14   3   0    1.00    0.33
 -14   3   0    1.55    0.46
  13  -3   0    0.10    0.50
  13  -3   0    0.32    0.27
  13  -3   0    0.04    0.37
 -13   3   0    0.15    0.37
 -13   3   0    0.08    0.28
  12  -3   0    2.62    0.41
  12  -3   0    2.65    0.31
 -12   3   0    3.06    0.37
  11  -3   0    5.40    0.41
  11  -3   0    5.18    0.54
  11  -3   0    6.54    0.73
 -11   3   0    5.21    0.62
 -11   3   0    6.44    0.46
  10  -3   0    1.29    0.31
  10  -3   0    1.10    0.21
  10  -3   0    1.53    0.41
 -10   3   0    0.89    0.36
 -10   3   0    1.41    0.26
 -10   3   0    0.74    0.29
   9  -3   0    2.51    0.34
   9  -3   0    2.38    0.25
   9  -3   0    2.18    0.43
  -9   3   0    2.41    0.37
  -9   3   0    2.56    0.36
  -9   3   0    2.41    0.28
   8  -3   0    0.05    0.09
   8  -3   0    0.19    0.08
   8  -3   0    0.25    0.17
   8  -3   0    0.17    0.21
   8  -3   0   -0.26    0.29
  -8   3   0   -0.02    0.23
  -8   3   0    0.03    0.22
  -8   3   0    0.43    0.19
   7  -3   0    0.90    0.30
   7  -3   0    0.38    0.12
   7  -3   0    0.49    0.10
   7  -3   0    0.68    0.17
   7  -3   0    0.27    0.27
   7  -3   0    0.78    0.22
  -7   3   0    0.75    0.26
  -7   3   0    0.57    0.20
  -7   3   0    0.34    0.23
   6  -3   0    1.85    0.28
   6  -3   0    2.24    0.33
   6  -3   0    2.25    0.19
   6  -3   0    2.16    0.25
   6  -3   0    2.23    0.20
   6  -3   0    2.43    0.27
  -6   3   0    2.34    0.28
  -6   3   0    1.95    0.24
  -6   3   0    2.34    0.31
   5  -3   0   -0.08    0.13
   5  -3   0    0.08    0.16
   5  -3   0   -0.01    0.11
   5  -3   0   -0.10    0.19
  -5   3   0   -0.01    0.14
  -5   3   0    0.00    0.17
  -5   3   0    0.04    0.16
   4  -3   0   -0.10    0.13
   4  -3   0    0.29    0.19
   4  -3   0    0.02    0.19
   4  -3   0   -0.06    0.13
   4  -3   0    0.10    0.14
   4  -3   0   -0.22    0.16
   4  -3   0    0.31    0.14
  -4   3   0    0.01    0.13
  -4   3   0    0.00    0.17
  -4   3   0    0.15    0.16
   3  -3   0    0.37    0.19
   3  -3   0    0.28    0.14
   3  -3   0    0.33    0.19
   3  -3   0    0.37    0.16
   3  -3   0    0.35    0.19
   3  -3   0    0.29    0.15
   3  -3   0    0.32    0.15
  -3   3   0    0.31    0.14
  -3   3   0    0.37    0.15
  -3   3   0    0.25    0.17
   2  -3   0    1.77    0.23
   2  -3   0    1.91    0.23
   2  -3   0    1.61    0.20
   2  -3   0    1.88    0.21
   2  -3   0    1.68    0.23
   2  -3   0    1.96    0.26
  -2   3   0    1.51    0.22
  -2   3   0    1.66    0.20
   1  -3   0   92.61    2.49
   1  -3   0   92.91    2.45
   1  -3   0   94.21    2.49
   1  -3   0   92.63    2.48
   1  -3   0   93.52    2.46
  -1   3   0   91.45    2.44
  -1   3   0   90.29    2.43
  -1   3   0   91.58    2.39
   0  -3   0   -0.07    0.16
   0  -3   0    0.01    0.12
   0  -3   0    0.15    0.15
   0  -3   0   -0.01    0.16
   0  -3   0    0.19    0.16
   0   3   0   -0.01    0.13
   0   3   0    0.03    0.12
   0   3   0    0.16    0.14
  -1  -3   0   91.06    2.49
  -1  -3   0   91.54    2.50
  -1  -3   0   91.31    2.37
  -1  -3   0   91.26    2.38
  -1  -3   0   94.77    2.46
   1   3   0   92.19    2.48
   1   3   0   90.57    2.40
   1   3   0   91.80    2.48
  -2  -3   0    1.47    0.17
  -2  -3   0    1.72    0.20
  -2  -3   0    1.66    0.17
  -2  -3   0    1.50    0.25
  -2  -3   0    1.46    0.23
  -2  -3   0    1.69    0.22
   2   3   0    1.63    0.25
   2   3   0    1.40    0.20
   2   3   0    1.48    0.19
  -3  -3   0    0.30    0.19
  -3  -3   0    0.31    0.08
  -3  -3   0    0.51    0.20
  -3  -3   0    0.31    0.14
  -3  -3   0    0.10    0.15
  -3  -3   0    0.34    0.08
   3   3   0    0.64    0.18
   3   3   0    0.45    0.16
   3   3   0    0.35    0.18
  -4  -3   0    0.13    0.16
  -4  -3   0    0.01    0.18
  -4  -3   0   -0.02    0.15
   4   3   0   -0.10    0.16
   4   3   0    0.07    0.15
   4   3   0   -0.08    0.14
  -5  -3   0   -0.02    0.15
  -5  -3   0    0.02    0.20
  -5  -3   0    0.31    0.18
   5   3   0   -0.11    0.16
   5   3   0    0.31    0.20
   5   3   0   -0.06    0.15
  -6  -3   0    1.78    0.30
  -6  -3   0    1.91    0.27
  -6  -3   0    2.46    0.30
   6   3   0    2.10    0.27
   6   3   0    3.04    0.40
   6   3   0    2.00    0.30
   6   3   0    2.69    0.30
  -7  -3   0    0.65    0.25
  -7  -3   0    0.33    0.20
  -7  -3   0    0.74    0.26
   7   3   0    1.15    0.28
   7   3   0    0.83    0.22
   7   3   0    0.33    0.22
  -8  -3   0    0.44    0.26
  -8  -3   0    0.15    0.21
  -8  -3   0   -0.17    0.22
   8   3   0    0.31    0.26
   8   3   0    0.18    0.22
   8   3   0    0.05    0.20
  -9  -3   0    2.93    0.33
  -9  -3   0    2.46    0.37
   9   3   0    2.58    0.36
   9   3   0    2.57    0.39
   9   3   0    2.44    0.37
 -10  -3   0    1.18    0.30
 -10  -3   0    1.42    0.29
  10   3   0    1.31    0.32
  10   3   0    0.87    0.36
  10   3   0    1.16    0.35
 -11  -3   0    6.22    0.51
 -11  -3   0    5.22    0.51
  11   3   0    5.98    0.60
  11   3   0    5.85    0.57
  11   3   0    5.39    0.24
  11   3   0    5.58    0.26
 -12  -3   0    3.18    0.41
 -12  -3   0    2.32    0.39
  12   3   0    2.59    0.23
  12   3   0    2.65    0.26
  12   3   0    2.95    0.49
  12   3   0    2.38    0.44
 -13  -3   0    0.41    0.34
  13   3   0    0.56    0.16
  13   3   0    0.55    0.38
  13   3   0   -0.07    0.38
  13   3   0   -0.21    0.18
 -14  -3   0    1.30    0.39
 -14  -3   0    0.99    0.37
  14   3   0    1.28    0.49
 -15  -3   0   -0.14    0.42
 -15  -3   0    0.31    0.39
  15   3   0    0.92    0.47
  15   3   0    0.26    0.52
 -16  -3   0   -0.47    0.46
 -16  -3   0   -0.06    0.44
  16   3   0   -0.22    0.51
  16   3   0    1.45    0.58
 -17  -3   0    0.09    0.50
 -17  -3   0   -0.63    0.46
  17   3   0   -0.38    0.66
  17   3   0   -0.65    0.63
 -18  -3   0    0.70    0.54
 -18  -3   0   -0.30    0.59
  18   3   0   -0.25    0.75
  18   3   0   -0.62    0.73
  16  -4   0    1.27    0.69
  16  -4   0    1.98    0.88
 -16   4   0    0.83    0.61
 -16   4   0   -0.24    0.54
  15  -4   0    0.84    0.76
  15  -4   0    1.33    0.59
 -15   4   0    0.03    0.50
 -15   4   0    0.94    0.61
  14  -4   0    0.18    0.66
  14  -4   0    0.05    0.50
 -14   4   0   -0.14    0.50
 -14   4   0   -0.35    0.41
  13  -4   0    1.98    0.71
 -13   4   0    2.42    0.42
 -13   4   0    1.40    0.49
  12  -4   0    0.04    0.39
  12  -4   0   -0.16    0.52
 -12   4   0    0.39    0.35
 -12   4   0    0.26    0.43
  11  -4   0    3.42    0.48
  11  -4   0    3.18    0.55
 -11   4   0    3.35    0.55
 -11   4   0    3.16    0.41
  10  -4   0    5.60    0.57
  10  -4   0    4.49    0.45
  10  -4   0    5.00    0.22
 -10   4   0    4.57    0.49
   9  -4   0    1.17    0.27
   9  -4   0    1.22    0.19
   9  -4   0    1.32    0.14
   9  -4   0    1.25    0.32
   9  -4   0    1.18    0.46
  -9   4   0    0.90    0.31
  -9   4   0    1.85    0.42
  -9   4   0    1.50    0.38
   8  -4   0    1.14    0.38
   8  -4   0    1.58    0.22
   8  -4   0    2.04    0.29
   8  -4   0    1.58    0.30
   8  -4   0    1.34    0.36
  -8   4   0    1.29    0.31
  -8   4   0    1.80    0.40
  -8   4   0    1.23    0.35
   7  -4   0    0.78    0.32
   7  -4   0    0.68    0.20
   7  -4   0    1.19    0.27
   7  -4   0    0.99    0.20
   7  -4   0    1.00    0.26
   7  -4   0    1.25    0.39
  -7   4   0    1.06    0.28
  -7   4   0    0.88    0.30
   6  -4   0    7.45    0.42
   6  -4   0    7.13    0.51
   6  -4   0    7.67    0.40
   6  -4   0    6.63    0.46
   6  -4   0    7.69    0.66
   6  -4   0    7.96    0.47
  -6   4   0    8.62    0.59
  -6   4   0    6.92    0.51
   5  -4   0    7.72    0.47
   5  -4   0    7.79    0.49
   5  -4   0    8.05    0.63
   5  -4   0    8.12    0.42
   5  -4   0    7.95    0.63
   5  -4   0    7.28    0.58
   5  -4   0    7.85    0.46
   5  -4   0    7.14    0.45
  -5   4   0    7.74    0.50
  -5   4   0    7.70    0.54
   4  -4   0    0.17    0.26
   4  -4   0   -0.10    0.24
   4  -4   0    0.29    0.20
   4  -4   0   -0.09    0.19
   4  -4   0    0.10    0.20
   4  -4   0   -0.14    0.23
  -4   4   0   -0.01    0.21
  -4   4   0    0.31    0.20
  -4   4   0   -0.06    0.20
   3  -4   0    1.35    0.23
   3  -4   0    1.33    0.30
   3  -4   0    1.48    0.25
   3  -4   0    1.40    0.28
   3  -4   0    1.16    0.23
   3  -4   0    1.51    0.32
   3  -4   0    1.49    0.30
   3  -4   0    1.61    0.31
  -3   4   0    1.23    0.24
  -3   4   0    1.14    0.26
   2  -4   0    3.64    0.39
   2  -4   0    3.23    0.34
   2  -4   0    3.62    0.42
   2  -4   0    2.76    0.33
   2  -4   0    3.66    0.45
   2  -4   0    2.63    0.33
   2  -4   0    3.99    0.39
   2  -4   0    2.80    0.34
  -2   4   0    3.26    0.35
  -2   4   0    3.25    0.35
   1  -4   0    2.80    0.30
   1  -4   0    2.80    0.32
   1  -4   0    2.65    0.33
   1  -4   0    2.17    0.29
   1  -4   0    2.35    0.33
   1  -4   0    2.30    0.35
   1  -4   0    2.37    0.28
  -1   4   0    2.06    0.30
  -1   4   0    2.27    0.26
  -1   4   0    2.46    0.31
   0  -4   0    2.40    0.35
   0  -4   0    2.75    0.34
   0  -4   0    2.75    0.29
   0  -4   0    2.95    0.33
   0  -4   0    2.39    0.33
   0  -4   0    2.60    0.32
   0  -4   0    2.49    0.29
   0   4   0    2.56    0.31
   0   4   0    2.86    0.35
   0   4   0    2.60    0.32
  -1  -4   0    1.79    0.32
  -1  -4   0    2.10    0.30
  -1  -4   0    2.65    0.39
  -1  -4   0    2.50    0.31
  -1  -4   0    2.43    0.24
  -1  -4   0    2.40    0.29
  -1  -4   0    2.10    0.29
   1   4   0    1.94    0.28
   1   4   0    2.62    0.32
   1   4   0    2.47    0.33
  -2  -4   0    3.03    0.40
  -2  -4   0    2.72    0.35
  -2  -4   0    3.24    0.26
  -2  -4   0    3.39    0.38
  -2  -4   0    2.86    0.41
   2   4   0    3.09    0.37
   2   4   0    2.93    0.33
   2   4   0    2.78    0.34
  -3  -4   0    1.27    0.16
  -3  -4   0    1.13    0.23
  -3  -4   0    1.64    0.20
  -3  -4   0    1.35    0.29
  -3  -4   0    1.44    0.29
   3   4   0    1.08    0.28
   3   4   0    1.36    0.26
   3   4   0    1.36    0.29
  -4  -4   0    0.25    0.09
  -4  -4   0   -0.23    0.29
  -4  -4   0    0.19    0.09
  -4  -4   0    0.29    0.21
  -4  -4   0    0.38    0.25
  -4  -4   0    0.09    0.23
   4   4   0    0.23    0.21
   4   4   0    0.28    0.24
   4   4   0    0.02    0.22
  -5  -4   0    7.42    0.55
  -5  -4   0    8.25    0.50
  -5  -4   0    7.82    0.53
   5   4   0    7.91    0.52
   5   4   0    7.81    0.55
   5   4   0    8.23    0.57
  -6  -4   0    5.90    0.52
  -6  -4   0    8.66    0.54
  -6  -4   0    8.56    0.60
   6   4   0    8.14    0.58
   6   4   0    7.79    0.53
   6   4   0    7.75    0.61
  -7  -4   0    0.77    0.27
  -7  -4   0    0.43    0.30
  -7  -4   0    0.96    0.34
   7   4   0    1.36    0.35
   7   4   0    1.12    0.34
   7   4   0    1.10    0.30
  -8  -4   0    1.20    0.37
  -8  -4   0    1.36    0.29
   8   4   0    1.49    0.39
   8   4   0    1.70    0.38
   8   4   0    1.87    0.38
  -9  -4   0    1.07    0.37
  -9  -4   0    0.94    0.31
   9   4   0    0.93    0.38
   9   4   0    1.50    0.33
 -10  -4   0    4.86    0.54
  10   4   0    4.50    0.56
  10   4   0    6.14    0.62
 -11  -4   0    3.03    0.51
 -11  -4   0    2.33    0.40
  11   4   0    3.60    0.56
  11   4   0    3.01    0.57
 -12  -4   0    0.00    0.31
 -12  -4   0    0.44    0.41
  12   4   0    0.10    0.45
  12   4   0    0.17    0.49
 -13  -4   0    2.55    0.48
 -13  -4   0    1.95    0.50
  13   4   0    2.31    0.51
  13   4   0    2.18    0.61
 -14  -4   0    0.33    0.43
 -14  -4   0   -0.11    0.42
  14   4   0   -0.74    0.47
  14   4   0    0.46    0.52
 -15  -4   0    0.08    0.49
 -15  -4   0    0.50    0.52
  15   4   0    1.49    0.69
  15   4   0    0.12    0.58
 -16  -4   0    2.28    0.55
 -16  -4   0    1.44    0.56
  16   4   0    0.32    0.73
  16   4   0    0.72    0.66
  15  -5   0    0.83    0.72
  15  -5   0    1.11    0.89
 -15   5   0    0.43    0.72
 -15   5   0   -0.14    0.59
  14  -5   0    1.06    0.84
  14  -5   0   -0.91    0.56
 -14   5   0   -0.93    0.63
 -14   5   0    0.00    0.53
  13  -5   0    1.11    0.53
  13  -5   0    1.49    0.72
 -13   5   0    0.72    0.59
 -13   5   0    0.06    0.52
  12  -5   0   -0.31    0.67
 -12   5   0    0.85    0.60
  11  -5   0   -0.45    0.42
  11  -5   0   -0.49    0.59
 -11   5   0   -0.53    0.46
 -11   5   0   -0.72    0.41
  10  -5   0    0.03    0.39
  10  -5   0    0.98    0.55
 -10   5   0    0.11    0.42
 -10   5   0   -0.18    0.36
   9  -5   0    0.02    0.21
   9  -5   0   -0.03    0.47
   9  -5   0   -0.18    0.25
   9  -5   0   -0.16    0.34
  -9   5   0    0.63    0.45
  -9   5   0   -0.33    0.34
   8  -5   0    0.24    0.24
   8  -5   0    0.09    0.29
   8  -5   0    0.06    0.32
   8  -5   0    0.35    0.44
  -8   5   0    0.09    0.33
  -8   5   0   -0.47    0.41
   7  -5   0    6.68    0.49
   7  -5   0    5.86    0.50
   7  -5   0    6.22    0.69
   7  -5   0    6.24    0.58
   7  -5   0    7.52    0.66
  -7   5   0    6.27    0.61
   6  -5   0    0.14    0.27
   6  -5   0    0.41    0.45
   6  -5   0   -0.06    0.30
   6  -5   0   -0.57    0.28
   6  -5   0    0.46    0.38
   6  -5   0   -0.24    0.34
  -6   5   0    0.69    0.34
   5  -5   0    0.63    0.37
   5  -5   0    0.77    0.38
   5  -5   0    0.05    0.29
   5  -5   0    0.20    0.30
   5  -5   0    0.82    0.32
   5  -5   0    0.62    0.29
  -5   5   0    0.75    0.32
   4  -5   0   -0.57    0.29
   4  -5   0   -0.18    0.25
   4  -5   0   -0.02    0.27
   4  -5   0    0.19    0.30
   4  -5   0    0.56    0.37
   4  -5   0   -0.59    0.29
  -4   5   0   -0.24    0.26
  -4   5   0    0.41    0.31
   3  -5   0   19.41    0.89
   3  -5   0   18.31    0.95
   3  -5   0   18.47    0.90
   3  -5   0   19.48    0.79
   3  -5   0   17.19    0.80
   3  -5   0   19.71    0.81
  -3   5   0   20.61    0.92
  -3   5   0   20.45    0.85
   2  -5   0    1.10    0.30
   2  -5   0    1.17    0.33
   2  -5   0    0.90    0.32
   2  -5   0    0.68    0.43
   2  -5   0    0.94    0.34
   2  -5   0    1.12    0.41
   2  -5   0    1.35    0.36
  -2   5   0    1.07    0.32
  -2   5   0    1.36    0.34
   1  -5   0    0.19    0.26
   1  -5   0    0.45    0.33
   1  -5   0    0.40    0.27
   1  -5   0    0.00    0.33
   1  -5   0    0.31    0.28
   1  -5   0   -0.16    0.33
   1  -5   0    0.27    0.28
  -1   5   0    0.39    0.28
  -1   5   0   -0.12    0.28
   0  -5   0   -0.17    0.33
   0  -5   0   -0.81    0.28
   0  -5   0    0.16    0.27
   0  -5   0   -0.06    0.25
   0  -5   0   -0.26    0.24
   0  -5   0    0.06    0.33
   0   5   0    0.22    0.24
   0   5   0   -0.21    0.28
  -1  -5   0   -0.03    0.34
  -1  -5   0    0.12    0.35
  -1  -5   0    0.48    0.24
  -1  -5   0    0.20    0.27
  -1  -5   0    0.01    0.24
   1   5   0    0.09    0.24
   1   5   0   -0.22    0.30
  -2  -5   0    1.77    0.33
  -2  -5   0    1.39    0.38
  -2  -5   0    1.15    0.23
  -2  -5   0    0.68    0.38
  -2  -5   0    1.09    0.24
   2   5   0    1.14    0.38
   2   5   0    0.96    0.39
   2   5   0    1.01    0.28
  -3  -5   0   19.52    0.96
  -3  -5   0   19.90    0.93
  -3  -5   0   20.26    0.67
  -3  -5   0   19.12    0.85
   3   5   0   18.70    0.80
   3   5   0   19.27    0.90
   3   5   0   15.84    0.91
  -4  -5   0    0.03    0.14
  -4  -5   0   -0.13    0.15
  -4  -5   0    0.85    0.35
  -4  -5   0   -0.05    0.30
  -4  -5   0    0.16    0.37
   4   5   0    0.17    0.31
   4   5   0   -0.06    0.36
   4   5   0    0.44    0.29
  -5  -5   0    0.82    0.34
  -5  -5   0    0.96    0.35
  -5  -5   0    0.60    0.40
   5   5   0    0.77    0.33
   5   5   0    0.35    0.33
  -6  -5   0    0.03    0.32
  -6  -5   0   -0.48    0.36
   6   5   0    0.01    0.36
   6   5   0    0.28    0.31
  -7  -5   0    7.74    0.74
  -7  -5   0    6.74    0.67
   7   5   0    6.92    0.66
   7   5   0    5.81    0.69
  -8  -5   0    0.04    0.45
  -8  -5   0    0.05    0.36
   8   5   0    0.57    0.45
   8   5   0   -0.17    0.37
  -9  -5   0   -0.20    0.35
  -9  -5   0   -0.31    0.46
   9   5   0    0.44    0.40
   9   5   0   -0.08    0.39
 -10  -5   0   -0.21    0.48
  10   5   0    0.14    0.44
  10   5   0    0.12    0.52
 -11  -5   0   -0.42    0.49
 -11  -5   0    0.35    0.41
  11   5   0    0.38    0.47
  11   5   0   -0.34    0.47
 -12  -5   0    0.66    0.57
 -12  -5   0    0.28    0.46
  12   5   0    1.30    0.60
  12   5   0    0.37    0.56
 -13  -5   0    0.37    0.62
 -13  -5   0    0.83    0.50
  13   5   0    0.97    0.58
  13   5   0    0.94    0.64
 -14  -5   0    0.13    0.63
 -14  -5   0   -0.18    0.50
  14   5   0   -0.50    0.75
  14   5   0    0.57    0.73
 -15  -5   0    0.91    0.59
 -15  -5   0    0.24    0.66
  15   5   0   -0.30    0.80
  15   5   0   -0.90    0.71
  12  -6   0    0.08    0.85
  12  -6   0    0.10    0.89
  12  -6   0    1.00    0.63
 -12   6   0    1.42    0.72
 -12   6   0    0.54    0.62
  11  -6   0   -0.19    0.75
  11  -6   0   -0.47    0.55
  11  -6   0    0.48    0.76
 -11   6   0   -0.06    0.60
 -11   6   0    0.27    0.56
  10  -6   0    0.12    0.66
  10  -6   0   -0.53    0.48
  10  -6   0   -0.80    0.72
 -10   6   0   -0.75    0.56
 -10   6   0    0.05    0.51
   9  -6   0    0.73    0.74
   9  -6   0   -0.06    0.46
   9  -6   0   -0.33    0.65
  -9   6   0   -0.13    0.49
   8  -6   0    0.46    0.73
   8  -6   0   -0.05    0.60
   8  -6   0    0.03    0.37
   8  -6   0    0.23    0.42
  -8   6   0    0.45    0.45
   7  -6   0    0.20    0.52
   7  -6   0    0.35    0.39
   7  -6   0   -0.13    0.41
   7  -6   0    0.81    0.59
  -7   6   0    0.42    0.45
   6  -6   0    0.82    0.40
   6  -6   0    0.11    0.47
   6  -6   0    0.08    0.38
   6  -6   0   -0.19    0.45
   6  -6   0    0.89    0.62
  -6   6   0    0.75    0.47
   5  -6   0    1.11    0.48
   5  -6   0    0.70    0.49
   5  -6   0    0.28    0.36
   5  -6   0    0.20    0.45
   5  -6   0   -0.16    0.51
  -5   6   0    0.07    0.42
   4  -6   0   -0.31    0.40
   4  -6   0   -0.02    0.35
   4  -6   0    0.56    0.42
   4  -6   0    0.25    0.54
   4  -6   0   -0.08    0.52
   4  -6   0    0.74    0.44
  -4   6   0    0.33    0.41
   3  -6   0   -0.42    0.51
   3  -6   0   -0.21    0.36
   3  -6   0    0.00    0.43
   3  -6   0   -0.20    0.49
   3  -6   0    1.02    0.41
   3  -6   0    0.15    0.42
  -3   6   0    0.19    0.42
  -3   6   0    0.60    0.41
   2  -6   0    1.01    0.41
   2  -6   0    1.47    0.38
   2  -6   0    0.76    0.50
   2  -6   0    0.73    0.41
   2  -6   0    0.16    0.50
  -2   6   0    1.11    0.42
   1  -6   0    8.55    0.69
   1  -6   0    5.58    0.65
   1  -6   0    7.75    0.82
   1  -6   0    7.85    0.92
   1  -6   0    8.08    0.74
   1  -6   0    5.45    0.66
  -1   6   0    9.02    0.73
   0  -6   0    0.14    0.35
   0  -6   0    0.12    0.35
   0  -6   0    0.46    0.41
   0  -6   0    0.69    0.43
   0  -6   0    0.28    0.54
   0   6   0    0.02    0.41
  -1  -6   0    7.19    0.61
  -1  -6   0    6.67    0.79
  -1  -6   0    8.00    0.64
  -1  -6   0    9.21    0.72
  -1  -6   0    7.28    0.82
   1   6   0    7.80    0.64
  -2  -6   0    0.98    0.47
  -2  -6   0    0.88    0.31
  -2  -6   0    0.43    0.44
  -2  -6   0    1.73    0.53
  -2  -6   0    0.91    0.34
   2   6   0    1.26    0.36
   2   6   0    0.71    0.41
  -3  -6   0    0.14    0.42
  -3  -6   0    0.06    0.44
  -3  -6   0   -0.25    0.42
  -3  -6   0   -0.19    0.25
  -3  -6   0   -0.25    0.26
   3   6   0   -0.23    0.35
   3   6   0    0.41    0.38
  -4  -6   0    0.43    0.48
  -4  -6   0    0.49    0.42
   4   6   0    0.23    0.43
   4   6   0    0.52    0.40
  -5  -6   0    0.15    0.51
   5   6   0    0.84    0.41
   5   6   0   -0.46    0.48
  -6  -6   0    1.35    0.55
   6   6   0   -0.69    0.50
   6   6   0   -0.24    0.40
  -7  -6   0    0.11    0.47
  -7  -6   0    0.89    0.56
   7   6   0   -0.25    0.45
   7   6   0    0.19    0.51
  -8  -6   0    0.56    0.51
  -8  -6   0    0.47    0.55
   8   6   0    0.54    0.54
   8   6   0    0.25    0.50
  -9  -6   0   -0.43    0.62
  -9  -6   0    0.29    0.49
   9   6   0    0.62    0.56
   9   6   0    0.17    0.55
 -10  -6   0    0.41    0.68
 -10  -6   0   -0.40    0.49
  10   6   0   -0.43    0.66
  10   6   0   -0.08    0.54
 -11  -6   0   -0.67    0.51
 -11  -6   0   -0.85    0.65
  11   6   0   -0.44    0.65
  11   6   0    0.14    0.62
 -12  -6   0   -0.07    0.70
 -12  -6   0   -0.05    0.59
  12   6   0    0.33    0.72
  12   6   0   -0.61    0.77
   8  -7   0   -0.33    0.77
   8  -7   0    0.45    0.93
  -8   7   0    0.44    0.67
   7  -7   0    0.48    0.90
   7  -7   0    0.51    0.84
   7  -7   0    1.36    0.81
  -7   7   0    1.03    0.69
   6  -7   0   -0.44    0.62
   6  -7   0    1.65    0.52
   6  -7   0    0.29    0.70
   6  -7   0    0.56    0.69
   6  -7   0    1.48    0.84
  -6   7   0    0.40    0.65
   5  -7   0   -0.43    0.71
   5  -7   0    0.77    0.63
   5  -7   0    1.32    0.52
   5  -7   0   -0.86    0.72
   4  -7   0    0.48    0.75
   4  -7   0   -0.10    0.60
   4  -7   0   -0.67    0.72
   4  -7   0    0.38    0.63
   4  -7   0    0.48    0.50
   3  -7   0    0.36    0.64
   3  -7   0    1.34    0.78
   3  -7   0   -0.72    0.64
   3  -7   0    0.09    0.45
   2  -7   0   -1.03    0.62
   2  -7   0    0.82    0.50
   2  -7   0   -0.04    0.62
   2  -7   0   -0.79    0.54
   2  -7   0    0.04    0.73
  -2   7   0   -0.19    0.54
   1  -7   0   -0.29    0.50
   1  -7   0    0.56    0.48
   1  -7   0    0.00    0.58
   1  -7   0   -0.82    0.63
  -1   7   0    0.95    0.59
   0  -7   0    0.24    0.52
   0  -7   0    0.20    0.50
   0  -7   0   -0.06    0.72
   0  -7   0   -0.08    0.63
   0   7   0    0.87    0.59
  -1  -7   0    1.94    0.75
  -1  -7   0    0.01    0.44
  -1  -7   0    0.54    0.63
  -1  -7   0   -0.11    0.58
   1   7   0    0.66    0.53
  -2  -7   0    0.80    0.70
  -2  -7   0   -0.31    0.58
   2   7   0    0.35    0.47
   2   7   0   -0.60    0.51
  -3  -7   0    0.34    0.70
  -3  -7   0   -0.22    0.60
   3   7   0   -0.89    0.61
   3   7   0   -0.36    0.48
  -4  -7   0   -0.83    0.59
  -4  -7   0   -0.84    0.63
   4   7   0   -0.26    0.51
   4   7   0   -1.08    0.63
  -5  -7   0    1.77    0.74
  -5  -7   0   -0.13    0.60
   5   7   0    0.47    0.60
  -6  -7   0    0.93    0.65
  -6  -7   0    0.90    0.77
   6   7   0    0.61    0.63
   6   7   0    1.37    0.68
  -7  -7   0    0.85    0.78
  -7  -7   0    1.28    0.69
   7   7   0    0.39    0.59
   7   7   0    0.12    0.73
  -8  -7   0   -0.10    0.68
  -8  -7   0    2.03    0.91
   8   7   0   -0.45    0.66
   8   7   0    1.05    0.66
  -9  -7   0   -1.19    0.85
   9   7  -1    0.09    0.69
   9   7  -1    0.49    0.73
  -9  -7   1    1.54    0.91
  -9  -7   1   -0.06    0.72
   8   7  -1   -0.56    0.67
   8   7  -1    0.95    0.65
  -8  -7   1   -0.22    0.75
  -8  -7   1    1.41    0.66
   7   7  -1   -1.54    0.55
   7   7  -1    0.26    0.73
  -7  -7   1    0.02    0.67
  -7  -7   1    0.86    0.78
   6   7  -1    0.81    0.67
  -6  -7   1    0.53    0.62
  -6  -7   1    0.27    0.74
   5   7  -1    1.05    0.66
   5   7  -1    0.32    0.49
  -5  -7   1    1.80    0.71
  -5  -7   1    0.41    0.75
   4   7  -1   -0.53    0.53
   4   7  -1   -0.18    0.48
  -4  -7   1    0.49    0.69
  -4  -7   1    0.22    0.61
   3   7  -1    1.38    0.49
   3   7  -1    1.46    0.64
  -3  -7   1    2.60    0.72
  -3  -7   1    1.14    0.64
   2   7  -1   -0.04    0.52
   2   7  -1    0.09    0.46
  -2  -7   1    0.15    0.63
  -2  -7   1    1.06    0.57
  -2  -7   1    0.37    0.67
   1   7  -1   -0.33    0.50
  -1  -7   1    0.47    0.63
  -1  -7   1    0.77    0.69
  -1  -7   1    0.05    0.44
  -1  -7   1    0.25    0.51
   0   7  -1    0.80    0.54
   0  -7   1    0.72    0.66
   0  -7   1    0.40    0.72
   0  -7   1   -0.41    0.49
   0  -7   1    0.04    0.49
  -1   7  -1    0.30    0.57
   1  -7   1    0.68    0.58
   1  -7   1    0.83    0.53
   1  -7   1    0.57    0.47
   1  -7   1    0.35    0.70
  -2   7  -1    0.12    0.54
   2  -7   1   -0.34    0.47
   2  -7   1   -0.08    0.56
   2  -7   1   -0.66    0.66
   2  -7   1    0.26    0.73
  -3   7  -1   -0.37    0.50
   3  -7   1    0.58    0.62
   3  -7   1    0.26    0.69
   3  -7   1    0.28    0.61
   3  -7   1    0.29    0.46
   4  -7   1    1.13    0.66
   4  -7   1    0.77    0.74
   4  -7   1    0.86    0.78
   4  -7   1    1.37    0.49
  -5   7  -1    1.61    0.61
   5  -7   1    0.49    0.63
   5  -7   1    0.68    0.66
   5  -7   1    1.11    0.81
   5  -7   1   -0.68    0.73
  -6   7  -1    0.48    0.64
   6  -7   1   -1.11    0.78
   6  -7   1   -0.80    0.70
   6  -7   1    0.47    0.82
   6  -7   1   -0.40    0.60
  -7   7  -1    1.14    0.69
   7  -7   1    0.72    0.78
   7  -7   1   -0.48    0.78
  -8   7  -1    0.47    0.70
   8  -7   1    0.37    0.85
   8  -7   1   -0.15    0.82
  12   6  -1   -0.52    0.69
  12   6  -1    1.28    0.72
 -12  -6   1   -0.01    0.54
 -12  -6   1   -1.58    0.71
  11   6  -1    0.63    0.64
  11   6  -1   -0.33    0.63
 -11  -6   1    0.03    0.52
 -11  -6   1   -1.55    0.67
  10   6  -1    0.76    0.62
  10   6  -1    0.77    0.55
 -10  -6   1   -0.11    0.48
   9   6  -1    0.46    0.51
   9   6  -1    0.38    0.64
  -9  -6   1    1.12    0.60
  -9  -6   1   -0.20    0.53
   8   6  -1    0.59    0.45
   8   6  -1    0.80    0.54
  -8  -6   1    1.27    0.48
  -8  -6   1   -0.06    0.54
   7   6  -1    1.02    0.56
   7   6  -1    0.18    0.45
  -7  -6   1    0.39    0.46
  -7  -6   1    0.68    0.52
   6   6  -1   -0.07    0.40
   6   6  -1    0.51    0.50
  -6  -6   1    0.49    0.42
  -6  -6   1    0.01    0.54
   5   6  -1    0.49    0.44
   5   6  -1    0.04    0.38
  -5  -6   1    0.30    0.52
   4   6  -1    7.52    0.83
   4   6  -1    7.24    0.65
  -4  -6   1    6.88    0.42
  -4  -6   1    5.86    0.70
  -4  -6   1    7.42    0.89
   3   6  -1    1.79    0.46
   3   6  -1    2.75    0.42
  -3  -6   1    2.85    0.47
  -3  -6   1    2.79    0.32
  -3  -6   1    1.79    0.31
  -3  -6   1    1.98    0.57
  -3  -6   1    2.03    0.52
   2   6  -1   -0.33    0.43
   2   6  -1   -0.10    0.32
  -2  -6   1    0.23    0.30
  -2  -6   1   -0.28    0.46
  -2  -6   1    0.36    0.31
  -2  -6   1    0.09    0.38
  -2  -6   1   -0.32    0.40
   1   6  -1    1.12    0.41
   1   6  -1    0.48    0.31
  -1  -6   1    0.60    0.34
  -1  -6   1    0.88    0.40
  -1  -6   1   -0.22    0.36
  -1  -6   1    0.97    0.52
  -1  -6   1    1.57    0.57
  -1  -6   1    0.95    0.38
   0   6  -1    3.67    0.53
   0  -6   1    3.04    0.59
   0  -6   1    3.22    0.45
   0  -6   1    3.23    0.46
  -1   6  -1   -0.21    0.39
   1  -6   1    0.23    0.48
   1  -6   1    0.01    0.32
   1  -6   1    0.21    0.43
   1  -6   1    0.35    0.37
  -2   6  -1    0.22    0.41
  -2   6  -1    0.68    0.38
   2  -6   1   -0.06    0.44
   2  -6   1    0.38    0.38
   2  -6   1   -0.07    0.46
   2  -6   1    0.25    0.47
   2  -6   1    0.79    0.33
  -3   6  -1    0.72    0.38
  -3   6  -1    0.10    0.41
   3  -6   1    0.08    0.44
   3  -6   1    0.05    0.40
   3  -6   1    0.48    0.50
   3  -6   1    0.32    0.32
   3  -6   1   -0.52    0.45
  -4   6  -1   -0.39    0.36
  -4   6  -1    0.13    0.43
   4  -6   1   -0.17    0.42
   4  -6   1    0.20    0.57
   4  -6   1    0.31    0.40
   4  -6   1    0.72    0.35
   4  -6   1    0.69    0.45
  -5   6  -1    0.16    0.43
   5  -6   1   -0.01    0.54
   5  -6   1   -0.34    0.34
   5  -6   1    0.39    0.44
   5  -6   1   -0.59    0.44
   5  -6   1    0.15    0.47
   5  -6   1   -0.76    0.38
  -6   6  -1    3.92    0.59
   6  -6   1    2.39    0.57
   6  -6   1    3.75    0.48
   6  -6   1    3.00    0.48
   6  -6   1    4.38    0.73
   6  -6   1    3.94    0.56
  -7   6  -1    0.08    0.44
   7  -6   1    0.10    0.60
   7  -6   1    0.00    0.39
   7  -6   1    0.38    0.55
   7  -6   1    0.36    0.38
  -8   6  -1    0.17    0.50
   8  -6   1   -0.06    0.59
   8  -6   1    0.39    0.36
   8  -6   1    1.03    0.73
   8  -6   1   -0.88    0.38
  -9   6  -1    1.11    0.53
   9  -6   1    1.64    0.68
   9  -6   1    1.92    0.75
   9  -6   1    0.64    0.45
 -10   6  -1   -0.10    0.56
  10  -6   1    1.55    0.77
  10  -6   1   -0.23    0.49
  10  -6   1   -0.29    0.72
 -11   6  -1    0.78    0.75
 -11   6  -1   -0.38    0.57
  11  -6   1    0.48    0.59
  11  -6   1    1.25    0.87
  11  -6   1    0.93    0.80
 -12   6  -1   -0.19    0.72
 -12   6  -1   -0.77    0.59
  12  -6   1    0.89    0.62
  12  -6   1    0.56    0.86
  12  -6   1    0.30    0.82
  15   5  -1    0.40    0.73
  15   5  -1    0.33    0.74
 -15  -5   1   -0.23    0.58
 -15  -5   1   -0.50    0.65
  14   5  -1    0.96    0.76
  14   5  -1   -0.23    0.64
 -14  -5   1    0.54    0.52
 -14  -5   1   -0.19    0.58
  13   5  -1    0.02    0.56
  13   5  -1   -0.03    0.58
 -13  -5   1    1.11    0.62
 -13  -5   1    0.02    0.51
  12   5  -1    1.79    0.55
  12   5  -1    1.82    0.58
 -12  -5   1    1.19    0.52
 -12  -5   1    1.68    0.50
  11   5  -1   -0.08    0.46
  11   5  -1    0.63    0.59
 -11  -5   1   -0.30    0.40
 -11  -5   1    0.09    0.52
  10   5  -1    0.75    0.53
  10   5  -1    0.95    0.47
 -10  -5   1    1.25    0.49
   9   5  -1    0.04    0.40
   9   5  -1   -0.07    0.39
  -9  -5   1    0.75    0.46
  -9  -5   1   -0.29    0.35
   8   5  -1    0.81    0.44
   8   5  -1    0.76    0.37
  -8  -5   1    0.89    0.37
  -8  -5   1    0.32    0.43
   7   5  -1   -0.04    0.36
   7   5  -1    0.49    0.34
  -7  -5   1    0.51    0.43
  -7  -5   1    0.63    0.33
   6   5  -1    0.15    0.38
   6   5  -1    0.37    0.29
  -6  -5   1    0.15    0.32
  -6  -5   1   -0.41    0.37
  -6  -5   1   -0.36    0.35
   5   5  -1    0.61    0.35
   5   5  -1    0.16    0.28
  -5  -5   1    0.43    0.34
  -5  -5   1    0.56    0.38
  -5  -5   1    0.13    0.30
   4   5  -1    0.30    0.36
   4   5  -1   -0.03    0.28
  -4  -5   1    0.13    0.33
  -4  -5   1    0.27    0.37
  -4  -5   1    0.42    0.14
  -4  -5   1    0.17    0.14
  -4  -5   1    0.06    0.28
   3   5  -1    0.57    0.27
   3   5  -1    0.85    0.36
  -3  -5   1    1.10    0.34
  -3  -5   1    0.69    0.39
  -3  -5   1    1.29    0.30
  -3  -5   1    1.02    0.20
   2   5  -1    0.49    0.25
   2   5  -1    0.32    0.28
  -2  -5   1   -0.04    0.23
  -2  -5   1    0.00    0.34
  -2  -5   1    0.15    0.27
  -2  -5   1    0.15    0.21
  -2  -5   1    0.23    0.36
   1   5  -1    1.16    0.27
   1   5  -1    1.05    0.31
  -1  -5   1    1.15    0.28
  -1  -5   1    1.01    0.25
  -1  -5   1    0.85    0.32
  -1  -5   1    0.78    0.39
  -1  -5   1    0.98    0.28
   0   5  -1    2.13    0.30
   0   5  -1    1.65    0.34
   0   5  -1    1.66    0.35
   0  -5   1    1.74    0.41
   0  -5   1    1.83    0.44
   0  -5   1    2.18    0.32
   0  -5   1    1.86    0.32
   0  -5   1    2.28    0.40
   0  -5   1    1.74    0.33
   0  -5   1    2.06    0.35
  -1   5  -1    0.81    0.33
  -1   5  -1    0.98    0.29
   1  -5   1    0.51    0.30
   1  -5   1    0.84    0.29
   1  -5   1    1.29    0.40
   1  -5   1    0.44    0.30
   1  -5   1    0.82    0.28
   1  -5   1    1.43    0.31
   1  -5   1    0.89    0.36
  -2   5  -1    4.89    0.55
  -2   5  -1    3.97    0.43
   2  -5   1    4.40    0.48
   2  -5   1    4.57    0.44
   2  -5   1    5.39    0.52
   2  -5   1    4.30    0.46
   2  -5   1    4.72    0.56
   2  -5   1    4.54    0.55
  -3   5  -1    0.47    0.28
  -3   5  -1   -0.11    0.32
   3  -5   1    0.67    0.32
   3  -5   1    0.60    0.37
   3  -5   1    0.27    0.29
   3  -5   1    0.07    0.36
   3  -5   1    0.49    0.26
   3  -5   1    0.59    0.28
  -4   5  -1    7.68    0.56
  -4   5  -1    6.92    0.58
   4  -5   1    6.79    0.55
   4  -5   1    6.53    0.50
   4  -5   1    7.48    0.67
   4  -5   1    7.30    0.77
   4  -5   1    5.98    0.50
  -5   5  -1    2.12    0.39
   5  -5   1    1.75    0.34
   5  -5   1    1.69    0.40
   5  -5   1    0.64    0.32
   5  -5   1    1.70    0.32
   5  -5   1    1.21    0.48
   5  -5   1    1.72    0.36
  -6   5  -1    4.36    0.54
   6  -5   1    6.18    0.48
   6  -5   1    4.89    0.51
   6  -5   1    7.38    0.81
   6  -5   1    5.74    0.52
   6  -5   1    5.19    0.61
   6  -5   1    5.02    0.51
  -7   5  -1    0.46    0.35
  -7   5  -1    0.45    0.43
   7  -5   1    0.55    0.28
   7  -5   1    0.49    0.30
   7  -5   1    1.09    0.53
   7  -5   1    0.53    0.41
   7  -5   1    0.96    0.27
   7  -5   1    1.23    0.39
  -8   5  -1    3.49    0.48
  -8   5  -1    4.42    0.57
   8  -5   1    2.38    0.59
   8  -5   1    4.65    0.52
   8  -5   1    2.90    0.41
   8  -5   1    3.23    0.63
   8  -5   1    3.68    0.40
   8  -5   1    3.68    0.41
  -9   5  -1   -0.60    0.35
  -9   5  -1    0.76    0.41
   9  -5   1    0.08    0.35
   9  -5   1   -0.18    0.20
   9  -5   1   -0.64    0.48
 -10   5  -1    1.29    0.51
 -10   5  -1    0.64    0.43
  10  -5   1    0.77    0.56
  10  -5   1    0.79    0.41
 -11   5  -1   -0.57    0.53
  11  -5   1    0.02    0.58
  11  -5   1    0.82    0.48
 -12   5  -1    0.42    0.57
 -12   5  -1    0.69    0.48
  12  -5   1    1.40    0.74
 -13   5  -1   -0.04    0.63
 -13   5  -1   -0.78    0.47
  13  -5   1    0.25    0.74
  13  -5   1   -0.15    0.54
 -14   5  -1    0.34    0.54
 -14   5  -1   -0.12    0.64
  14  -5   1    0.54    0.83
  14  -5   1    1.71    0.65
  17   4  -1   -0.22    0.67
  17   4  -1    1.34    0.80
 -17  -4   1   -0.43    0.59
 -17  -4   1   -0.34    0.53
  16   4  -1    0.93    0.73
  16   4  -1    0.49    0.62
 -16  -4   1    0.42    0.54
 -16  -4   1    0.34    0.58
  15   4  -1    0.86    0.64
  15   4  -1    0.01    0.55
 -15  -4   1   -0.18    0.47
 -15  -4   1   -0.22    0.49
  14   4  -1    3.15    0.60
  14   4  -1    2.58    0.57
 -14  -4   1    2.93    0.57
 -14  -4   1    2.52    0.50
  13   4  -1    0.45    0.54
  13   4  -1   -0.10    0.44
 -13  -4   1    0.12    0.43
 -13  -4   1   -0.08    0.36
  12   4  -1   -0.05    0.38
  12   4  -1   -0.28    0.46
 -12  -4   1    0.87    0.45
  11   4  -1    1.06    0.39
 -11  -4   1    0.63    0.43
 -11  -4   1    0.62    0.35
  10   4  -1    3.60    0.46
  10   4  -1    3.35    0.52
 -10  -4   1    3.67    0.54
 -10  -4   1    3.76    0.43
   9   4  -1    0.80    0.31
   9   4  -1    1.00    0.38
  -9  -4   1    0.53    0.29
  -9  -4   1    1.22    0.37
   8   4  -1    1.97    0.38
   8   4  -1    2.09    0.34
   8   4  -1    1.76    0.37
  -8  -4   1    2.25    0.36
  -8  -4   1    2.05    0.42
   7   4  -1    0.60    0.30
   7   4  -1    1.71    0.38
   7   4  -1    0.68    0.27
  -7  -4   1    1.17    0.33
  -7  -4   1    0.97    0.30
  -7  -4   1    0.88    0.29
   6   4  -1    0.61    0.25
   6   4  -1    0.74    0.34
   6   4  -1    0.54    0.28
  -6  -4   1    0.38    0.26
  -6  -4   1    0.08    0.29
  -6  -4   1    0.35    0.25
   5   4  -1   10.90    0.61
   5   4  -1   10.69    0.62
   5   4  -1   11.08    0.57
  -5  -4   1   11.17    0.57
  -5  -4   1   11.76    0.65
  -5  -4   1   11.62    0.66
   4   4  -1    8.48    0.47
   4   4  -1   10.04    0.61
   4   4  -1    8.67    0.59
  -4  -4   1    9.00    0.31
  -4  -4   1    9.89    0.60
  -4  -4   1    8.41    0.48
  -4  -4   1    9.42    0.31
  -4  -4   1    8.45    0.53
   3   4  -1    0.09    0.24
   3   4  -1    0.01    0.24
   3   4  -1    0.12    0.18
  -3  -4   1   -0.08    0.19
  -3  -4   1    0.17    0.11
  -3  -4   1    0.33    0.23
  -3  -4   1   -0.22    0.26
  -3  -4   1    0.05    0.12
   2   4  -1   16.03    0.72
   2   4  -1   15.09    0.60
   2   4  -1   14.49    0.71
  -2  -4   1   14.70    0.72
  -2  -4   1   14.92    0.73
  -2  -4   1   15.78    0.61
  -2  -4   1   14.97    0.54
   1   4  -1    0.81    0.23
   1   4  -1    1.29    0.27
   1   4  -1    1.05    0.21
   1   4  -1    1.36    0.27
  -1  -4   1    1.27    0.21
  -1  -4   1    0.87    0.20
  -1  -4   1    1.35    0.31
  -1  -4   1    1.09    0.27
  -1  -4   1    0.60    0.23
  -1  -4   1    1.42    0.20
  -1  -4   1    1.38    0.29
   0   4  -1   17.36    0.71
   0   4  -1   16.77    0.71
   0   4  -1   15.80    0.61
   0  -4   1   15.92    0.66
   0  -4   1   16.59    0.66
   0  -4   1   16.28    0.65
   0  -4   1   17.12    0.63
   0  -4   1   15.69    0.74
   0  -4   1   17.11    0.75
  -1   4  -1    7.50    0.45
  -1   4  -1    7.86    0.47
   1  -4   1    6.59    0.41
   1  -4   1    7.65    0.55
   1  -4   1    7.45    0.47
   1  -4   1    7.72    0.42
   1  -4   1    7.85    0.46
   1  -4   1    7.59    0.45
  -2   4  -1   -0.07    0.20
  -2   4  -1    0.10    0.19
   2  -4   1   -0.30    0.20
   2  -4   1    0.15    0.26
   2  -4   1   -0.33    0.18
   2  -4   1   -0.14    0.16
   2  -4   1   -0.03    0.23
   2  -4   1    0.00    0.16
   2  -4   1    0.23    0.21
  -3   4  -1    1.06    0.27
  -3   4  -1    0.89    0.24
   3  -4   1    1.23    0.30
   3  -4   1    0.89    0.21
   3  -4   1    0.97    0.27
   3  -4   1    0.72    0.22
   3  -4   1    1.00    0.26
   3  -4   1    1.21    0.23
   3  -4   1    1.70    0.36
  -4   4  -1    1.78    0.31
  -4   4  -1    1.97    0.25
   4  -4   1    1.68    0.34
   4  -4   1    1.86    0.28
   4  -4   1    2.10    0.27
   4  -4   1    1.21    0.23
   4  -4   1    1.78    0.33
  -5   4  -1    3.41    0.42
  -5   4  -1    4.16    0.48
   5  -4   1    3.33    0.46
   5  -4   1    3.11    0.33
   5  -4   1    3.59    0.35
   5  -4   1    3.57    0.43
   5  -4   1    3.59    0.35
   5  -4   1    4.12    0.40
   5  -4   1    3.60    0.36
  -6   4  -1   12.08    0.67
  -6   4  -1   11.71    0.62
   6  -4   1   11.72    0.75
   6  -4   1   11.81    0.57
   6  -4   1   11.14    0.56
   6  -4   1   11.98    0.51
   6  -4   1   11.86    0.51
   6  -4   1   12.00    0.59
  -7   4  -1    1.03    0.33
  -7   4  -1    1.78    0.37
  -7   4  -1    1.54    0.31
   7  -4   1    1.53    0.28
   7  -4   1    1.89    0.30
   7  -4   1    1.69    0.22
   7  -4   1    1.79    0.40
   7  -4   1    1.81    0.32
  -8   4  -1    1.20    0.35
  -8   4  -1    1.17    0.31
   8  -4   1    1.31    0.30
   8  -4   1    1.16    0.39
   8  -4   1    1.34    0.18
   8  -4   1    0.95    0.15
  -9   4  -1    1.20    0.38
  -9   4  -1    0.98    0.31
  -9   4  -1    1.01    0.39
   9  -4   1    0.57    0.13
   9  -4   1    0.73    0.10
   9  -4   1    0.61    0.29
   9  -4   1    0.83    0.32
   9  -4   1    0.88    0.40
 -10   4  -1    0.89    0.41
 -10   4  -1    0.39    0.29
 -10   4  -1   -0.03    0.39
  10  -4   1   -0.02    0.29
  10  -4   1   -0.26    0.46
 -11   4  -1    3.61    0.46
 -11   4  -1    3.28    0.53
  11  -4   1    3.77    0.49
  11  -4   1    3.49    0.61
 -12   4  -1    1.77    0.47
 -12   4  -1    0.96    0.40
  12  -4   1    0.77    0.39
  12  -4   1    2.21    0.58
 -13   4  -1    0.25    0.50
 -13   4  -1    0.26    0.40
  13  -4   1    0.55    0.60
 -14   4  -1   -0.18    0.45
 -14   4  -1    0.21    0.56
  14  -4   1    0.13    0.48
  14  -4   1    0.58    0.62
 -15   4  -1    0.68    0.62
 -15   4  -1    0.71    0.50
  15  -4   1    0.75    0.62
  15  -4   1    0.64    0.77
 -16   4  -1    0.40    0.53
 -16   4  -1    0.00    0.67
  16  -4   1    0.94    0.69
  16  -4   1   -0.31    0.88
  18   3  -1    2.11    0.77
  18   3  -1    1.16    0.79
 -18  -3   1    0.75    0.60
 -18  -3   1    0.47    0.51
  17   3  -1    0.89    0.66
  17   3  -1    1.37    0.65
 -17  -3   1    0.79    0.49
 -17  -3   1    0.26    0.46
  16   3  -1    0.45    0.57
  16   3  -1    1.64    0.59
 -16  -3   1    1.02    0.42
 -16  -3   1    0.82    0.43
  15   3  -1    0.50    0.53
  15   3  -1    1.55    0.47
 -15  -3   1    1.25    0.39
 -15  -3   1    0.96    0.41
  14   3  -1    5.47    0.67
  14   3  -1    5.68    0.64
 -14  -3   1    4.53    0.51
 -14  -3   1    4.58    0.52
  13   3  -1    0.21    0.13
  13   3  -1   -0.31    0.35
  13   3  -1    0.14    0.17
  13   3  -1    0.37    0.38
 -13  -3   1    0.29    0.31
 -13  -3   1   -0.14    0.30
  12   3  -1    0.56    0.37
  12   3  -1    0.38    0.12
  12   3  -1    0.55    0.32
  12   3  -1    0.38    0.11
 -12  -3   1    0.72    0.30
 -12  -3   1    0.23    0.26
  11   3  -1    1.34    0.37
  11   3  -1    1.94    0.38
 -11  -3   1    1.81    0.31
 -11  -3   1    2.20    0.38
  10   3  -1   -0.26    0.33
  10   3  -1   -0.08    0.27
  10   3  -1    0.05    0.27
 -10  -3   1    0.22    0.25
 -10  -3   1   -0.21    0.23
   9   3  -1    3.28    0.40
   9   3  -1    2.84    0.39
  -9  -3   1    2.38    0.34
  -9  -3   1    2.69    0.34
   8   3  -1   -0.01    0.20
   8   3  -1    0.25    0.23
   8   3  -1    0.43    0.25
  -8  -3   1   -0.51    0.21
  -8  -3   1    0.16    0.19
  -8  -3   1   -0.02    0.24
   7   3  -1    0.83    0.26
   7   3  -1    0.87    0.20
   7   3  -1    0.82    0.25
  -7  -3   1    0.94    0.25
  -7  -3   1    0.72    0.23
  -7  -3   1    0.90    0.21
   6   3  -1   21.95    0.79
   6   3  -1   21.02    0.81
   6   3  -1   21.21    0.83
  -6  -3   1   22.10    0.81
  -6  -3   1   22.10    0.79
   5   3  -1    8.72    0.49
   5   3  -1    9.47    0.45
  -5  -3   1    9.60    0.52
  -5  -3   1    9.13    0.45
  -5  -3   1    9.51    0.49
   4   3  -1    0.36    0.19
   4   3  -1    0.35    0.18
   4   3  -1    0.11    0.16
  -4  -3   1    0.14    0.17
  -4  -3   1    0.35    0.20
  -4  -3   1    0.09    0.19
  -4  -3   1    0.27    0.15
   3   3  -1   36.66    1.17
   3   3  -1   37.11    1.10
   3   3  -1   37.81    1.18
  -3  -3   1   35.91    1.06
  -3  -3   1   33.84    1.12
  -3  -3   1   36.34    0.95
  -3  -3   1   35.59    1.12
  -3  -3   1   35.95    1.16
  -3  -3   1   37.33    0.95
   2   3  -1    0.63    0.18
   2   3  -1    1.03    0.20
   2   3  -1    0.97    0.16
  -2  -3   1    0.70    0.12
  -2  -3   1    0.72    0.21
  -2  -3   1    0.95    0.20
  -2  -3   1    0.87    0.13
   1   3  -1    0.11    0.17
   1   3  -1   -0.01    0.13
   1   3  -1    0.32    0.16
  -1  -3   1   -0.21    0.17
  -1  -3   1    0.07    0.18
  -1  -3   1    0.09    0.12
  -1  -3   1    0.38    0.19
  -1  -3   1   -0.04    0.10
  -1  -3   1   -0.01    0.10
   0   3  -1   15.92    0.61
   0   3  -1   14.83    0.58
   0  -3   1   15.15    0.64
   0  -3   1   15.76    0.57
   0  -3   1   15.85    0.61
   0  -3   1   15.42    0.53
   0  -3   1   16.39    0.56
   0  -3   1   15.57    0.58
   0  -3   1   15.38    0.61
  -1   3  -1    0.95    0.19
  -1   3  -1    1.17    0.21
   1  -3   1    0.85    0.16
   1  -3   1    0.94    0.19
   1  -3   1    0.97    0.21
   1  -3   1    0.95    0.15
   1  -3   1    1.27    0.17
   1  -3   1    1.07    0.19
  -2   3  -1   26.57    0.89
  -2   3  -1   27.30    0.92
  -2   3  -1   28.60    0.87
   2  -3   1   28.68    0.97
   2  -3   1   26.66    0.89
   2  -3   1   26.71    0.83
   2  -3   1   26.94    0.88
   2  -3   1   26.08    0.90
   2  -3   1   26.58    0.81
  -3   3  -1    8.57    0.44
  -3   3  -1    8.52    0.37
  -3   3  -1    9.42    0.48
  -3   3  -1    7.86    0.46
   3  -3   1    9.07    0.48
   3  -3   1    9.12    0.52
   3  -3   1    8.87    0.46
   3  -3   1    8.19    0.45
   3  -3   1    8.51    0.38
  -4   3  -1    1.97    0.26
  -4   3  -1    1.94    0.23
  -4   3  -1    1.78    0.23
   4  -3   1    2.19    0.30
   4  -3   1    2.10    0.24
   4  -3   1    2.09    0.20
   4  -3   1    1.47    0.25
   4  -3   1    1.92    0.21
  -5   3  -1    0.37    0.18
  -5   3  -1   -0.07    0.17
  -5   3  -1    0.23    0.17
   5  -3   1    0.19    0.21
   5  -3   1    0.20    0.12
   5  -3   1    0.25    0.14
   5  -3   1    0.14    0.15
   5  -3   1    0.03    0.22
   5  -3   1    0.05    0.11
  -6   3  -1   16.71    0.72
  -6   3  -1   16.77    0.67
  -6   3  -1   17.09    0.66
   6  -3   1   16.88    0.58
   6  -3   1   15.72    0.51
   6  -3   1   16.33    0.62
   6  -3   1   16.14    0.51
   6  -3   1   16.03    0.73
  -7   3  -1    2.89    0.32
  -7   3  -1    3.46    0.33
  -7   3  -1    3.42    0.41
   7  -3   1    3.03    0.16
   7  -3   1    3.26    0.29
   7  -3   1    3.14    0.39
   7  -3   1    2.80    0.18
   7  -3   1    3.38    0.36
  -8   3  -1    6.36    0.42
  -8   3  -1    6.37    0.50
  -8   3  -1    6.66    0.50
   8  -3   1    6.51    0.61
   8  -3   1    6.76    0.46
  -9   3  -1    4.76    0.40
  -9   3  -1    4.26    0.48
  -9   3  -1    4.46    0.47
   9  -3   1    4.39    0.36
   9  -3   1    3.98    0.50
   9  -3   1    4.23    0.44
 -10   3  -1   10.51    0.56
 -10   3  -1   10.74    0.71
 -10   3  -1   10.29    0.70
  10  -3   1   11.00    0.62
  10  -3   1   11.01    0.79
  10  -3   1   10.56    0.49
 -11   3  -1    5.34    0.48
 -11   3  -1    5.55    0.62
  11  -3   1    5.54    0.64
  11  -3   1    4.91    0.40
  11  -3   1    4.39    0.52
 -12   3  -1   11.68    0.66
 -12   3  -1   11.53    0.76
  12  -3   1   12.99    0.62
  12  -3   1   11.59    0.97
  12  -3   1   13.09    0.78
 -13   3  -1    0.81    0.41
 -13   3  -1    0.36    0.32
  13  -3   1   -0.30    0.47
  13  -3   1    0.65    0.43
 -14   3  -1    0.52    0.49
 -14   3  -1    0.18    0.35
  14  -3   1    1.79    0.62
  14  -3   1    0.69    0.44
 -15   3  -1    0.35    0.40
 -15   3  -1    0.01    0.52
  15  -3   1    0.55    0.46
  15  -3   1    0.63    0.67
 -16   3  -1   -0.14    0.57
  16  -3   1   -0.32    0.57
  16  -3   1   -0.54    0.72
 -17   3  -1    0.32    0.52
 -17   3  -1    0.52    0.66
  17  -3   1    0.93    0.76
  17  -3   1    0.37    0.67
  19   2  -1    0.23    0.72
  19   2  -1    0.22    0.79
 -19  -2   1   -0.70    0.57
 -19  -2   1   -0.34    0.41
  18   2  -1    1.16    0.72
 -18  -2   1    0.06    0.42
 -18  -2   1    0.71    0.54
  17   2  -1    0.10    0.54
  17   2  -1    0.70    0.42
  17   2  -1    1.18    0.56
 -17  -2   1    1.32    0.45
 -17  -2   1    1.30    0.41
  16   2  -1   -0.11    0.45
  16   2  -1    0.08    0.51
  16   2  -1   -0.19    0.35
 -16  -2   1    0.23    0.35
 -16  -2   1    0.25    0.34
  15   2  -1    4.14    0.51
  15   2  -1    4.90    0.60
  15   2  -1    4.53    0.57
 -15  -2   1    5.22    0.55
 -15  -2   1    5.00    0.61
  14   2  -1    0.25    0.37
  14   2  -1    0.68    0.41
  14   2  -1    0.49    0.28
  14   2  -1    0.65    0.28
 -14  -2   1    0.47    0.28
 -14  -2   1    0.36    0.29
  13   2  -1    0.38    0.24
  13   2  -1    0.46    0.23
  13   2  -1    0.30    0.34
  13   2  -1    0.26    0.32
 -13  -2   1    0.30    0.31
 -13  -2   1    0.54    0.26
 -13  -2   1    0.52    0.26
  12   2  -1   20.88    0.92
  12   2  -1   20.75    0.73
  12   2  -1   18.99    0.96
  12   2  -1   20.39    0.89
  12   2  -1   20.12    0.73
 -12  -2   1   21.43    0.86
 -12  -2   1   22.68    0.85
 -12  -2   1   20.26    0.84
  11   2  -1    2.88    0.29
  11   2  -1    3.02    0.45
  11   2  -1    2.24    0.36
  11   2  -1    2.69    0.36
 -11  -2   1    2.84    0.38
 -11  -2   1    2.61    0.31
 -11  -2   1    2.23    0.30
  10   2  -1    8.77    0.39
  10   2  -1    9.35    0.56
  10   2  -1    8.70    0.54
 -10  -2   1    9.12    0.52
 -10  -2   1    9.75    0.52
 -10  -2   1    9.69    0.51
   9   2  -1    2.49    0.32
   9   2  -1    2.39    0.21
   9   2  -1    2.50    0.32
   9   2  -1    2.15    0.30
   9   2  -1    2.33    0.19
   9   2  -1    2.10    0.34
  -9  -2   1    2.55    0.31
  -9  -2   1    2.76    0.34
  -9  -2   1    3.01    0.32
   8   2  -1    1.37    0.26
   8   2  -1    1.42    0.24
   8   2  -1    1.34    0.15
   8   2  -1    1.37    0.26
   8   2  -1    1.38    0.24
   8   2  -1    1.43    0.15
  -8  -2   1    1.54    0.22
  -8  -2   1    1.32    0.21
  -8  -2   1    1.08    0.21
   7   2  -1    2.58    0.30
   7   2  -1    1.74    0.26
   7   2  -1    2.03    0.13
   7   2  -1    1.98    0.12
   7   2  -1    2.20    0.27
  -7  -2   1    1.88    0.23
  -7  -2   1    1.79    0.21
  -7  -2   1    2.02    0.25
   6   2  -1   10.15    0.28
   6   2  -1   10.87    0.47
   6   2  -1   10.32    0.47
   6   2  -1   10.23    0.48
  -6  -2   1    9.73    0.44
  -6  -2   1    9.97    0.45
  -6  -2   1   10.77    0.48
   5   2  -1    2.61    0.28
   5   2  -1    2.61    0.24
   5   2  -1    2.79    0.26
   5   2  -1    3.45    0.31
  -5  -2   1    2.52    0.24
  -5  -2   1    2.18    0.23
  -5  -2   1    2.59    0.24
   4   2  -1    0.66    0.16
   4   2  -1    0.20    0.10
   4   2  -1    0.32    0.13
   4   2  -1    0.51    0.14
  -4  -2   1    0.28    0.13
  -4  -2   1    0.42    0.13
   3   2  -1    3.52    0.21
   3   2  -1    3.48    0.27
  -3  -2   1    3.59    0.21
  -3  -2   1    3.37    0.24
  -3  -2   1    3.22    0.27
  -3  -2   1    3.37    0.25
   2   2  -1  115.71    3.02
   2   2  -1  123.19    3.10
   2   2  -1  119.19    3.08
  -2  -2   1  119.87    2.95
  -2  -2   1  118.37    3.06
  -2  -2   1  120.71    3.07
  -2  -2   1  113.41    3.04
  -2  -2   1  118.70    2.94
  -2  -2   1  122.30    3.01
   1   2  -1    7.61    0.34
   1   2  -1    7.02    0.28
   1   2  -1    7.91    0.35
  -1  -2   1    7.47    0.27
  -1  -2   1    7.42    0.28
  -1  -2   1    7.64    0.27
  -1  -2   1    7.53    0.32
   0   2  -1    2.38    0.15
   0   2  -1    2.47    0.17
   0   2  -1    2.32    0.20
   0   2  -1    2.47    0.19
   0  -2   1    2.33    0.21
   0  -2   1    2.32    0.15
   0  -2   1    2.01    0.17
   0  -2   1    2.02    0.16
   0  -2   1    2.29    0.23
   0  -2   1    2.42    0.20
  -1   2  -1   43.42    1.20
  -1   2  -1   42.75    1.17
  -1   2  -1   42.24    1.19
   1  -2   1   43.88    1.17
   1  -2   1   41.92    1.13
   1  -2   1   39.66    1.21
   1  -2   1   42.20    1.14
   1  -2   1   42.64    1.12
   1  -2   1   41.48    1.17
  -2   2  -1    2.19    0.21
  -2   2  -1    2.03    0.15
  -2   2  -1    1.87    0.18
  -2   2  -1    1.75    0.19
   2  -2   1    2.23    0.23
   2  -2   1    1.82    0.16
   2  -2   1    2.34    0.15
   2  -2   1    2.15    0.16
   2  -2   1    2.39    0.20
  -3   2  -1   28.57    0.84
  -3   2  -1   28.77    0.89
  -3   2  -1   28.49    0.85
  -3   2  -1   28.82    0.79
  -3   2  -1   28.68    0.91
   3  -2   1   28.71    0.78
   3  -2   1   26.78    0.80
   3  -2   1   28.20    0.86
   3  -2   1   28.47    0.90
  -4   2  -1   16.78    0.55
  -4   2  -1   16.01    0.56
  -4   2  -1   17.44    0.62
   4  -2   1   17.97    0.61
   4  -2   1   17.73    0.51
   4  -2   1   17.61    0.55
   4  -2   1   17.92    0.66
   4  -2   1   16.72    0.50
  -5   2  -1    0.56    0.13
  -5   2  -1    0.50    0.14
  -5   2  -1    0.35    0.15
   5  -2   1    0.38    0.11
   5  -2   1    0.51    0.07
   5  -2   1    0.43    0.18
   5  -2   1    0.52    0.07
   5  -2   1    0.39    0.14
   5  -2   1    0.52    0.14
  -6   2  -1   10.54    0.46
  -6   2  -1   10.72    0.43
  -6   2  -1   10.53    0.50
   6  -2   1   10.90    0.40
   6  -2   1   10.57    0.29
   6  -2   1   10.56    0.45
   6  -2   1   11.14    0.56
  -7   2  -1    0.11    0.17
  -7   2  -1    0.15    0.13
  -7   2  -1    0.07    0.18
   7  -2   1    0.04    0.14
   7  -2   1    0.22    0.12
   7  -2   1    0.09    0.21
  -8   2  -1   35.43    1.27
  -8   2  -1   35.54    1.15
  -8   2  -1   37.50    1.08
  -8   2  -1   37.48    1.20
   8  -2   1   38.75    1.08
   8  -2   1   37.31    1.18
   8  -2   1   38.29    1.31
  -9   2  -1    2.78    0.28
  -9   2  -1    3.48    0.36
  -9   2  -1    2.42    0.32
   9  -2   1    3.22    0.33
   9  -2   1    2.88    0.40
   9  -2   1    2.89    0.25
 -10   2  -1    0.04    0.26
 -10   2  -1    0.62    0.19
 -10   2  -1    0.61    0.25
  10  -2   1    0.34    0.16
  10  -2   1    0.48    0.25
  10  -2   1    0.64    0.31
 -11   2  -1    9.24    0.61
 -11   2  -1    9.02    0.47
  11  -2   1    7.40    0.70
  11  -2   1    7.24    0.43
  11  -2   1    9.22    0.58
 -12   2  -1    0.37    0.28
 -12   2  -1    0.07    0.20
  12  -2   1    0.10    0.37
  12  -2   1   -0.21    0.22
  12  -2   1    0.20    0.29
 -13   2  -1    0.22    0.23
  13  -2   1    0.03    0.34
  13  -2   1   -0.43    0.35
  13  -2   1    0.36    0.28
 -14   2  -1    0.37    0.29
 -14   2  -1    0.36    0.38
  14  -2   1   -0.02    0.46
  14  -2   1    0.53    0.42
 -15   2  -1    0.72    0.31
 -15   2  -1    0.46    0.43
  15  -2   1    0.23    0.56
  15  -2   1    0.55    0.44
 -16   2  -1    0.69    0.47
 -16   2  -1    0.01    0.34
  16  -2   1    0.04    0.58
  16  -2   1   -0.16    0.46
 -17   2  -1    1.58    0.54
 -17   2  -1    1.12    0.42
  17  -2   1    0.92    0.63
  17  -2   1    0.42    0.70
 -18   2  -1    0.09    0.64
 -18   2  -1    0.29    0.47
  18  -2   1    0.36    0.70
  18  -2   1    0.67    0.72
  19   1  -1   -0.36    0.72
  19   1  -1    1.83    0.65
 -19  -1   1    0.44    0.54
 -19  -1   1    0.07    0.35
  18   1  -1    0.57    0.52
  18   1  -1    0.50    0.65
  18   1  -1    0.65    0.49
 -18  -1   1   -0.04    0.50
 -18  -1   1    0.31    0.31
  17   1  -1    0.13    0.53
  17   1  -1   -0.73    0.44
  17   1  -1    0.37    0.44
 -17  -1   1    0.08    0.45
  16   1  -1    0.51    0.41
  16   1  -1    0.28    0.41
  16   1  -1   -0.32    0.40
 -16  -1   1   -0.01    0.25
 -16  -1   1   -0.46    0.35
  15   1  -1    0.25    0.34
  15   1  -1    0.37    0.43
  15   1  -1    0.41    0.35
  15   1  -1    0.68    0.39
 -15  -1   1    0.83    0.36
 -15  -1   1   -0.01    0.31
 -15  -1   1    0.39    0.26
  14   1  -1    2.56    0.42
  14   1  -1    1.71    0.45
  14   1  -1    2.42    0.40
  14   1  -1    3.08    0.41
 -14  -1   1    3.50    0.42
 -14  -1   1    2.63    0.34
 -14  -1   1    3.63    0.38
  13   1  -1    1.53    0.32
  13   1  -1    1.23    0.31
  13   1  -1    1.21    0.33
  13   1  -1    0.58    0.34
  13   1  -1    1.33    0.32
 -13  -1   1    0.89    0.24
 -13  -1   1    0.99    0.28
 -13  -1   1    0.99    0.23
  12   1  -1    1.59    0.35
  12   1  -1    2.26    0.36
  12   1  -1    1.88    0.31
  12   1  -1    2.00    0.31
  12   1  -1    1.80    0.31
 -12  -1   1    1.58    0.27
 -12  -1   1    1.76    0.26
 -12  -1   1    2.33    0.29
  11   1  -1   41.38    1.27
  11   1  -1   40.04    1.26
  11   1  -1   42.19    1.37
  11   1  -1   41.14    1.29
 -11  -1   1   42.29    1.23
 -11  -1   1   40.69    1.23
 -11  -1   1   40.70    1.29
  10   1  -1   17.93    0.72
  10   1  -1   18.84    0.69
  10   1  -1   17.83    0.75
  10   1  -1   19.16    0.72
  10   1  -1   18.39    0.69
 -10  -1   1   19.39    0.66
 -10  -1   1   18.06    0.65
 -10  -1   1   18.54    0.71
   9   1  -1   24.23    0.85
   9   1  -1   25.25    0.85
   9   1  -1   25.16    0.84
   9   1  -1   23.99    0.79
   9   1  -1   24.66    0.88
   9   1  -1   25.04    0.81
  -9  -1   1   23.06    0.76
  -9  -1   1   23.69    0.81
  -9  -1   1   25.11    0.79
   8   1  -1    0.22    0.16
   8   1  -1   -0.09    0.15
   8   1  -1    0.11    0.11
   8   1  -1   -0.27    0.16
  -8  -1   1    0.05    0.11
  -8  -1   1   -0.24    0.12
  -8  -1   1    0.04    0.12
   7   1  -1   -0.06    0.08
   7   1  -1    0.14    0.10
   7   1  -1    0.08    0.12
   7   1  -1   -0.14    0.12
   7   1  -1    0.05    0.14
   7   1  -1   -0.17    0.11
  -7  -1   1   -0.01    0.10
  -7  -1   1    0.16    0.11
  -7  -1   1    0.07    0.12
  -7  -1   1    0.01    0.11
   6   1  -1    2.59    0.23
   6   1  -1    2.15    0.21
   6   1  -1    2.06    0.15
   6   1  -1    2.16    0.16
  -6  -1   1    2.27    0.19
  -6  -1   1    2.55    0.23
  -6  -1   1    2.19    0.20
   5   1  -1    2.51    0.15
   5   1  -1    2.47    0.20
   5   1  -1    2.45    0.18
   5   1  -1    2.35    0.14
   5   1  -1    2.75    0.20
  -5  -1   1    2.51    0.18
  -5  -1   1    2.74    0.19
   4   1  -1   50.81    1.38
   4   1  -1   50.78    1.30
   4   1  -1   51.57    1.30
   4   1  -1   53.07    1.39
   4   1  -1   51.60    1.39
  -4  -1   1   48.04    1.35
  -4  -1   1   52.25    1.36
  -4  -1   1   51.53    1.36
   3   1  -1   79.77    1.97
   3   1  -1   78.86    2.06
   3   1  -1   81.12    2.06
   3   1  -1   81.32    2.06
  -3  -1   1   77.80    2.05
  -3  -1   1   81.53    2.03
  -3  -1   1   76.38    2.03
  -3  -1   1   81.73    2.04
   2   1  -1   22.76    0.63
   2   1  -1   22.47    0.66
   2   1  -1   23.41    0.67
   2   1  -1   23.50    0.66
  -2  -1   1   22.76    0.65
  -2  -1   1   23.36    0.67
  -2  -1   1   23.63    0.67
  -2  -1   1   23.77    0.64
  -2  -1   1   23.30    0.67
   1   1  -1  359.30    8.61
   1   1  -1  345.01    8.65
   1   1  -1  356.70    8.62
   1   1  -1  341.91    8.64
  -1  -1   1  316.54    8.60
  -1  -1   1  370.39    8.55
  -1  -1   1  367.19    8.66
   0   1  -1   35.31    0.88
   0   1  -1   34.46    0.92
   0   1  -1   34.63    0.91
   0   1  -1   34.31    0.94
   0  -1   1   34.26    0.90
  -1   1  -1    0.12    0.06
  -1   1  -1    0.03    0.06
  -1   1  -1    0.17    0.04
  -1   1  -1    0.13    0.04
  -1   1  -1    0.11    0.05
   1  -1   1    0.14    0.05
   1  -1   1    0.08    0.04
   1  -1   1    0.10    0.06
   1  -1   1    0.13    0.05
   1  -1   1    0.02    0.03
  -2   1  -1    2.73    0.11
  -2   1  -1    2.80    0.17
  -2   1  -1    2.71    0.14
  -2   1  -1    2.61    0.14
  -2   1  -1    2.98    0.18
   2  -1   1    2.76    0.10
   2  -1   1    2.90    0.14
   2  -1   1    2.63    0.13
   2  -1   1    2.52    0.17
   2  -1   1    2.90    0.16
  -3   1  -1   85.96    2.28
  -3   1  -1   88.40    2.22
  -3   1  -1   88.95    2.19
  -3   1  -1   85.80    2.25
   3  -1   1   90.92    2.28
   3  -1   1   87.52    2.26
   3  -1   1   88.37    2.19
   3  -1   1   86.16    2.19
   3  -1   1   88.81    2.22
   3  -1   1   92.49    2.33
  -4   1  -1   47.05    1.25
  -4   1  -1   45.15    1.20
  -4   1  -1   46.29    1.26
  -4   1  -1   45.17    1.31
   4  -1   1   46.24    1.31
   4  -1   1   45.19    1.27
   4  -1   1   48.40    1.21
   4  -1   1   45.87    1.25
  -5   1  -1   20.88    0.71
  -5   1  -1   19.63    0.66
   5  -1   1   20.46    0.59
   5  -1   1   20.10    0.71
   5  -1   1   20.97    0.65
  -6   1  -1    2.19    0.22
  -6   1  -1    2.21    0.20
  -6   1  -1    2.14    0.16
  -6   1  -1    1.98    0.25
   6  -1   1    2.14    0.21
   6  -1   1    2.14    0.26
   6  -1   1    2.21    0.16
  -7   1  -1   68.35    1.92
  -7   1  -1   71.73    1.82
   7  -1   1   69.03    1.82
   7  -1   1   70.38    1.75
   7  -1   1   68.99    1.92
   7  -1   1   72.44    2.01
  -8   1  -1    2.50    0.26
  -8   1  -1    2.72    0.21
  -8   1  -1    2.54    0.11
  -8   1  -1    3.05    0.36
   8  -1   1    2.88    0.30
   8  -1   1    2.64    0.13
   8  -1   1    2.49    0.30
   8  -1   1    2.40    0.21
  -9   1  -1    0.18    0.05
  -9   1  -1    0.18    0.20
  -9   1  -1    0.16    0.15
  -9   1  -1    0.32    0.12
   9  -1   1    0.09    0.14
   9  -1   1    0.18    0.21
   9  -1   1    0.07    0.07
   9  -1   1    0.24    0.16
 -10   1  -1    1.01    0.18
 -10   1  -1    1.16    0.36
 -10   1  -1    0.79    0.10
 -10   1  -1    0.49    0.19
  10  -1   1    0.72    0.22
  10  -1   1    0.87    0.11
  10  -1   1    0.66    0.28
  10  -1   1    0.64    0.18
 -11   1  -1    0.06    0.15
 -11   1  -1    0.01    0.07
 -11   1  -1   -0.10    0.21
  11  -1   1   -0.03    0.09
  11  -1   1    0.19    0.26
  11  -1   1   -0.08    0.29
  11  -1   1   -0.05    0.19
 -12   1  -1    8.07    0.56
 -12   1  -1    8.77    0.44
 -12   1  -1    7.99    0.28
  12  -1   1    8.29    0.61
  12  -1   1    8.34    0.50
  12  -1   1    8.93    0.70
  12  -1   1    7.76    0.32
 -13   1  -1    0.46    0.19
 -13   1  -1    0.67    0.29
 -13   1  -1    0.24    0.10
  13  -1   1    0.18    0.30
  13  -1   1    0.63    0.36
  13  -1   1    0.74    0.30
 -14   1  -1   -0.14    0.13
 -14   1  -1   -0.30    0.19
 -14   1  -1   -0.03    0.10
  14  -1   1   -0.10    0.42
 -15   1  -1    2.01    0.32
 -15   1  -1    2.84    0.47
  15  -1   1    2.52    0.57
  15  -1   1    2.48    0.55
 -16   1  -1    0.52    0.31
 -16   1  -1    1.04    0.46
  16  -1   1    0.63    0.53
  16  -1   1    0.65    0.48
 -17   1  -1    0.14    0.52
  17  -1   1    0.30    0.62
  17  -1   1    0.44    0.58
 -18   1  -1   -0.21    0.38
 -18   1  -1    0.71    0.58
  18  -1   1   -0.13    0.55
  18  -1   1   -0.73    0.67
 -19   1  -1    0.23    0.63
 -19   1  -1   -0.13    0.43
  19  -1   1    0.42    0.73
  19  -1   1   -0.85    0.75
  19   0  -1   -0.12    0.68
  19   0  -1    0.50    0.70
 -19   0   1   -1.17    0.59
 -19   0   1    0.11    0.36
  18   0  -1   -0.06    0.58
  18   0  -1   -0.44    0.54
 -18   0   1   -0.43    0.46
  17   0  -1    1.16    0.39
  17   0  -1    1.16    0.52
 -17   0   1    1.44    0.44
 -17   0   1    1.13    0.30
  16   0  -1    0.66    0.46
  16   0  -1    0.60    0.45
  16   0  -1    0.06    0.34
 -16   0   1   -0.31    0.35
 -16   0   1    0.06    0.23
  15   0  -1   22.31    1.10
  15   0  -1   21.29    0.97
  15   0  -1   22.48    0.87
  15   0  -1   22.99    1.08
 -15   0   1   21.10    0.73
 -15   0   1   22.79    0.78
 -15   0   1   20.45    0.98
  14   0  -1   -0.18    0.25
  14   0  -1    0.23    0.35
  14   0  -1    0.22    0.34
  14   0  -1    0.45    0.31
 -14   0   1    0.22    0.19
 -14   0   1   -0.13    0.27
 -14   0   1   -0.01    0.17
  13   0  -1    8.21    0.63
  13   0  -1    8.77    0.62
  13   0  -1    7.33    0.62
  13   0  -1    8.02    0.48
  13   0  -1    7.97    0.55
 -13   0   1    8.87    0.43
 -13   0   1    9.06    0.41
 -13   0   1    9.01    0.57
  12   0  -1   -0.02    0.23
  12   0  -1    0.13    0.21
  12   0  -1    0.11    0.21
  12   0  -1    0.07    0.26
  12   0  -1    0.13    0.29
 -12   0   1    0.08    0.20
 -12   0   1   -0.05    0.14
 -12   0   1    0.08    0.14
  11   0  -1    2.94    0.32
  11   0  -1    2.83    0.36
  11   0  -1    2.37    0.33
  11   0  -1    2.43    0.25
  11   0  -1    2.39    0.33
 -11   0   1    2.19    0.30
 -11   0   1    2.17    0.21
 -11   0   1    2.24    0.23
  10   0  -1    0.07    0.15
  10   0  -1   -0.36    0.18
  10   0  -1    0.10    0.18
  10   0  -1    0.13    0.20
  10   0  -1    0.00    0.15
 -10   0   1    0.13    0.12
 -10   0   1    0.04    0.15
 -10   0   1   -0.02    0.10
   9   0  -1    7.62    0.37
   9   0  -1    7.39    0.44
   9   0  -1    8.14    0.43
   9   0  -1    8.47    0.43
  -9   0   1    7.59    0.32
  -9   0   1    7.61    0.39
  -9   0   1    7.88    0.31
   8   0  -1    0.00    0.11
   8   0  -1   -0.06    0.16
   8   0  -1    0.03    0.14
   8   0  -1   -0.13    0.13
   8   0  -1   -0.08    0.10
  -8   0   1    0.02    0.08
  -8   0   1    0.09    0.18
  -8   0   1   -0.05    0.08
  -8   0   1   -0.02    0.12
   7   0  -1   11.77    0.49
   7   0  -1   11.80    0.47
   7   0  -1   11.59    0.41
   7   0  -1   11.79    0.48
   7   0  -1   12.37    0.42
  -7   0   1   12.21    0.50
  -7   0   1   12.99    0.40
  -7   0   1   12.22    0.39
  -7   0   1   11.08    0.45
   6   0  -1   -0.03    0.10
   6   0  -1    0.19    0.08
   6   0  -1   -0.02    0.10
   6   0  -1   -0.03    0.07
  -6   0   1   -0.03    0.10
  -6   0   1   -0.02    0.05
  -6   0   1   -0.10    0.06
  -6   0   1   -0.18    0.11
  -6   0   1   -0.07    0.08
   5   0  -1  167.19    4.11
   5   0  -1  174.02    4.19
   5   0  -1  159.15    4.16
   5   0  -1  165.60    4.21
   5   0  -1  162.60    4.19
   5   0  -1  171.61    4.16
  -5   0   1  166.02    4.15
  -5   0   1  171.52    4.26
  -5   0   1  171.37    4.20
  -5   0   1  167.51    4.26
   4   0  -1   -0.05    0.06
   4   0  -1   -0.04    0.06
   4   0  -1   -0.01    0.04
   4   0  -1   -0.13    0.06
   4   0  -1   -0.03    0.05
   4   0  -1    0.04    0.04
  -4   0   1   -0.03    0.05
  -4   0   1    0.03    0.04
  -4   0   1   -0.04    0.04
  -4   0   1   -0.06    0.07
  -4   0   1   -0.07    0.06
   3   0  -1   -0.10    0.06
   3   0  -1   -0.18    0.04
   3   0  -1   -0.11    0.04
   3   0  -1   -0.10    0.06
   3   0  -1   -0.13    0.06
  -3   0   1   -0.14    0.06
  -3   0   1   -0.11    0.04
  -3   0   1   -0.12    0.03
  -3   0   1   -0.14    0.05
  -2   0  -1   -0.05    0.04
  -2   0  -1   -0.05    0.03
  -2   0  -1   -0.09    0.03
  -2   0  -1   -0.01    0.04
  -2   0  -1   -0.01    0.03
   2   0   1   -0.04    0.04
   2   0   1   -0.02    0.04
   2   0   1   -0.13    0.04
   2   0   1   -0.04    0.03
  -3   0  -1   92.64    2.28
  -3   0  -1   94.24    2.30
  -3   0  -1   91.63    2.34
  -3   0  -1   88.93    2.31
  -3   0  -1   90.35    2.33
   3   0   1   90.05    2.36
   3   0   1   95.79    2.37
   3   0   1   92.92    2.33
   3   0   1   91.43    2.31
  -4   0  -1    0.02    0.05
  -4   0  -1   -0.04    0.07
  -4   0  -1   -0.01    0.04
  -4   0  -1    0.12    0.08
  -4   0  -1   -0.04    0.05
   4   0   1   -0.02    0.05
   4   0   1   -0.04    0.05
   4   0   1    0.02    0.04
   4   0   1   -0.02    0.07
   4   0   1    0.00    0.07
  -5   0  -1   70.17    1.91
  -5   0  -1   75.42    1.87
  -5   0  -1   73.92    1.95
   5   0   1   70.70    1.87
   5   0   1   73.08    1.84
   5   0   1   70.26    1.85
   5   0   1   73.30    1.91
  -6   0  -1   -0.02    0.06
  -6   0  -1    0.05    0.07
  -6   0  -1   -0.11    0.08
   6   0   1    0.08    0.12
   6   0   1    0.08    0.08
   6   0   1    0.06    0.07
   6   0   1   -0.02    0.10
  -7   0  -1   12.58    0.52
  -7   0  -1   12.38    0.41
  -7   0  -1   12.07    0.47
  -7   0  -1   13.03    0.43
   7   0   1   12.55    0.52
   7   0   1   13.01    0.47
   7   0   1   13.31    0.44
   7   0   1   12.92    0.53
   7   0   1   12.56    0.48
  -8   0  -1   -0.01    0.09
  -8   0  -1   -0.06    0.10
  -8   0  -1    0.00    0.12
  -8   0  -1    0.09    0.17
   8   0   1    0.15    0.11
   8   0   1   -0.08    0.11
   8   0   1   -0.14    0.16
   8   0   1    0.02    0.15
   8   0   1    0.21    0.12
  -9   0  -1   69.66    2.01
  -9   0  -1   71.91    1.86
  -9   0  -1   68.97    1.95
  -9   0  -1   70.03    1.84
   9   0   1   68.46    1.85
   9   0   1   66.78    1.94
   9   0   1   68.20    1.89
   9   0   1   68.08    1.95
 -10   0  -1   -0.01    0.25
 -10   0  -1    0.09    0.17
 -10   0  -1    0.21    0.13
  10   0   1    0.13    0.20
  10   0   1    0.16    0.17
  10   0   1   -0.20    0.20
  10   0   1    0.24    0.18
 -11   0  -1   48.42    1.34
 -11   0  -1   49.77    1.59
 -11   0  -1   48.83    1.51
 -11   0  -1   48.97    1.38
  11   0   1   46.69    1.37
  11   0   1   49.09    1.56
  11   0   1   49.46    1.55
 -12   0  -1    0.00    0.16
 -12   0  -1   -0.07    0.15
 -12   0  -1   -0.49    0.20
 -12   0  -1   -0.29    0.37
  12   0   1    0.30    0.32
  12   0   1    0.17    0.26
  12   0   1   -0.27    0.27
  12   0   1    0.11    0.20
  12   0   1   -0.05    0.25
 -13   0  -1    5.87    0.50
 -13   0  -1    6.98    0.41
 -13   0  -1    6.81    0.36
  13   0   1    6.87    0.62
  13   0   1    7.62    0.61
  13   0   1    7.02    0.46
  13   0   1    6.89    0.65
  13   0   1    7.86    0.65
 -14   0  -1   -0.15    0.18
 -14   0  -1   -0.19    0.19
 -14   0  -1    0.03    0.30
  14   0   1   -0.40    0.24
  14   0   1    0.36    0.40
  14   0   1   -0.11    0.33
 -15   0  -1    0.25    0.37
 -15   0  -1   -0.20    0.20
  15   0   1    0.04    0.42
  15   0   1    0.02    0.27
  15   0   1   -0.26    0.39
 -16   0  -1   -0.60    0.41
 -16   0  -1   -0.05    0.27
  16   0   1   -0.11    0.45
  16   0   1   -0.55    0.31
  16   0   1   -0.04    0.48
 -17   0  -1   -0.06    0.48
 -17   0  -1   -0.17    0.30
  17   0   1    0.82    0.55
  17   0   1   -0.10    0.51
 -18   0  -1   -0.20    0.54
 -18   0  -1    0.28    0.36
  18   0   1    0.63    0.63
  18   0   1    0.72    0.71
 -19   0  -1    1.23    0.44
 -19   0  -1    0.93    0.63
  19   0   1    0.95    0.76
  19   0   1   -0.17    0.78
  19  -1  -1    1.61    0.72
  19  -1  -1    0.09    0.73
 -19   1   1    0.22    0.38
 -19   1   1    1.46    0.67
  18  -1  -1    0.11    0.63
  18  -1  -1    0.49    0.63
 -18   1   1    0.01    0.34
 -18   1   1    0.32    0.46
  17  -1  -1    0.03    0.50
  17  -1  -1   -0.48    0.57
 -17   1   1    0.01    0.28
 -17   1   1    0.39    0.43
  16  -1  -1    0.90    0.54
  16  -1  -1    0.19    0.43
 -16   1   1    0.16    0.38
 -16   1   1    0.10    0.27
  15  -1  -1    0.95    0.45
  15  -1  -1    0.25    0.38
  15  -1  -1    0.02    0.35
 -15   1   1    0.52    0.25
 -15   1   1    0.16    0.37
 -15   1   1    0.33    0.16
  14  -1  -1    3.36    0.39
  14  -1  -1    3.21    0.46
  14  -1  -1    2.68    0.49
 -14   1   1    3.05    0.33
 -14   1   1    2.98    0.50
 -14   1   1    3.21    0.24
  13  -1  -1    1.27    0.19
  13  -1  -1    1.44    0.29
  13  -1  -1    1.42    0.34
  13  -1  -1    1.54    0.37
 -13   1   1    1.07    0.15
 -13   1   1    1.43    0.22
 -13   1   1    1.24    0.36
  12  -1  -1    2.12    0.38
  12  -1  -1    2.13    0.23
  12  -1  -1    1.85    0.27
  12  -1  -1    2.43    0.37
 -12   1   1    2.00    0.24
 -12   1   1    1.69    0.18
 -12   1   1    2.22    0.33
  11  -1  -1   41.46    1.12
  11  -1  -1   38.96    1.31
  11  -1  -1   41.23    1.41
  11  -1  -1   40.83    1.18
 -11   1   1   39.65    1.13
 -11   1   1   38.92    1.07
 -11   1   1   41.09    1.30
  10  -1  -1   18.40    0.56
  10  -1  -1   18.70    0.74
  10  -1  -1   18.75    0.63
  10  -1  -1   17.36    0.78
 -10   1   1   18.22    0.72
 -10   1   1   18.08    0.53
 -10   1   1   17.97    0.59
   9  -1  -1   25.09    0.75
   9  -1  -1   25.47    0.94
   9  -1  -1   23.30    0.88
   9  -1  -1   24.15    0.70
   9  -1  -1   25.33    0.87
  -9   1   1   24.22    0.72
  -9   1   1   25.07    0.86
  -9   1   1   24.10    0.67
   8  -1  -1   -0.02    0.14
   8  -1  -1   -0.01    0.18
   8  -1  -1    0.01    0.07
   8  -1  -1    0.10    0.08
  -8   1   1   -0.09    0.13
  -8   1   1   -0.12    0.08
  -8   1   1    0.00    0.06
   7  -1  -1    0.11    0.17
   7  -1  -1    0.06    0.06
   7  -1  -1   -0.02    0.07
   7  -1  -1    0.07    0.11
  -7   1   1    0.06    0.12
  -7   1   1   -0.07    0.13
  -7   1   1   -0.09    0.17
  -7   1   1   -0.05    0.05
   6  -1  -1    2.35    0.22
   6  -1  -1    2.26    0.13
   6  -1  -1    2.19    0.11
   6  -1  -1    2.72    0.27
   6  -1  -1    2.15    0.21
  -6   1   1    1.96    0.21
  -6   1   1    2.32    0.26
  -6   1   1    2.35    0.12
  -6   1   1    2.09    0.22
  -6   1   1    2.34    0.14
   5  -1  -1    2.58    0.13
   5  -1  -1    2.75    0.23
   5  -1  -1    2.48    0.20
   5  -1  -1    2.54    0.18
   5  -1  -1    2.75    0.11
  -5   1   1    2.66    0.12
  -5   1   1    2.46    0.14
   4  -1  -1   51.71    1.31
   4  -1  -1   52.01    1.31
   4  -1  -1   52.44    1.42
   4  -1  -1   53.16    1.39
   4  -1  -1   50.28    1.39
  -4   1   1   50.85    1.31
  -4   1   1   50.85    1.39
  -4   1   1   52.50    1.31
   3  -1  -1   77.95    2.00
   3  -1  -1   82.00    2.08
   3  -1  -1   81.97    1.98
   3  -1  -1   75.83    2.09
   3  -1  -1   82.56    2.05
   3  -1  -1   79.41    2.05
  -3   1   1   80.80    2.02
  -3   1   1   81.07    2.09
  -3   1   1   79.10    2.07
  -3   1   1   83.42    2.04
   2  -1  -1   22.93    0.67
   2  -1  -1   23.49    0.66
   2  -1  -1   19.52    0.63
   2  -1  -1   22.98    0.63
   2  -1  -1   23.43    0.61
   2  -1  -1   23.29    0.61
  -2   1   1   23.16    0.62
  -2   1   1   22.53    0.66
  -2   1   1   23.55    0.65
  -2   1   1   22.36    0.65
   1  -1  -1  367.38    8.78
   1  -1  -1  364.89    8.86
   1  -1  -1  345.01    8.90
   1  -1  -1  360.77    8.84
   1  -1  -1  370.61    8.88
  -1   1   1  364.86    8.68
  -1   1   1  366.82    8.81
  -1   1   1  357.76    8.80
  -1   1   1  341.57    8.85
  -1   1   1  357.90    8.80
   0  -1  -1   35.23    0.91
   0  -1  -1   31.91    0.88
   0  -1  -1   34.26    0.92
   0  -1  -1   35.20    0.90
   0   1   1   31.56    0.89
   0   1   1   33.48    0.89
   0   1   1   32.64    0.87
   0   1   1   32.69    0.88
   0   1   1   34.71    0.86
  -1  -1  -1    0.06    0.06
  -1  -1  -1    0.18    0.07
  -1  -1  -1    0.10    0.03
  -1  -1  -1    0.07    0.05
  -1  -1  -1    0.01    0.04
   1   1   1    0.08    0.06
   1   1   1    0.10    0.05
   1   1   1    0.14    0.03
   1   1   1    0.15    0.07
   1   1   1    0.13    0.05
  -2  -1  -1    2.73    0.14
  -2  -1  -1    2.91    0.16
  -2  -1  -1    2.61    0.11
  -2  -1  -1    2.92    0.17
  -2  -1  -1    2.50    0.16
   2   1   1    2.72    0.17
   2   1   1    2.77    0.11
   2   1   1    2.97    0.15
   2   1   1    2.76    0.16
   2   1   1    2.70    0.15
  -3  -1  -1   89.40    2.27
  -3  -1  -1   88.92    2.24
  -3  -1  -1   90.30    2.32
  -3  -1  -1   91.18    2.32
  -3  -1  -1   89.66    2.29
   3   1   1   87.22    2.25
   3   1   1   86.32    2.17
   3   1   1   90.36    2.25
   3   1   1   84.68    2.21
   3   1   1   86.08    2.23
  -4  -1  -1   46.73    1.28
  -4  -1  -1   45.95    1.26
  -4  -1  -1   46.26    1.27
  -4  -1  -1   46.63    1.21
  -4  -1  -1   45.41    1.23
   4   1   1   46.94    1.28
   4   1   1   46.46    1.22
   4   1   1   46.74    1.30
   4   1   1   46.64    1.28
   4   1   1   46.88    1.25
  -5  -1  -1   20.39    0.68
  -5  -1  -1   21.01    0.65
  -5  -1  -1   21.22    0.66
  -5  -1  -1   20.37    0.62
  -5  -1  -1   20.93    0.63
   5   1   1   21.08    0.66
   5   1   1   19.59    0.62
   5   1   1   19.88    0.59
   5   1   1   19.58    0.67
  -6  -1  -1    2.45    0.23
  -6  -1  -1    2.42    0.20
  -6  -1  -1    2.33    0.20
  -6  -1  -1    2.24    0.21
   6   1   1    2.24    0.17
   6   1   1    1.87    0.19
   6   1   1    2.17    0.21
   6   1   1    2.18    0.22
   6   1   1    2.29    0.24
  -7  -1  -1   70.38    1.90
  -7  -1  -1   70.64    1.90
  -7  -1  -1   70.29    1.91
  -7  -1  -1   72.68    1.90
   7   1   1   70.12    1.97
   7   1   1   68.12    1.92
   7   1   1   73.37    1.94
   7   1   1   72.28    1.91
  -8  -1  -1    2.87    0.26
  -8  -1  -1    3.21    0.28
  -8  -1  -1    2.38    0.25
  -8  -1  -1    2.77    0.26
   8   1   1    2.57    0.26
   8   1   1    2.53    0.28
   8   1   1    2.53    0.28
   8   1   1    2.71    0.27
   8   1   1    2.70    0.31
  -9  -1  -1    0.36    0.19
  -9  -1  -1    0.31    0.15
  -9  -1  -1    0.18    0.14
  -9  -1  -1    0.31    0.15
   9   1   1    0.02    0.17
   9   1   1    0.14    0.17
   9   1   1    0.15    0.16
   9   1   1    0.02    0.18
   9   1   1   -0.08    0.19
 -10  -1  -1    0.68    0.25
 -10  -1  -1    0.90    0.21
 -10  -1  -1    0.96    0.20
 -10  -1  -1    1.04    0.22
  10   1   1    0.84    0.21
  10   1   1    0.60    0.23
  10   1   1    0.81    0.23
  10   1   1    0.84    0.23
 -11  -1  -1    0.22    0.26
 -11  -1  -1    0.21    0.18
 -11  -1  -1    0.00    0.20
 -11  -1  -1   -0.03    0.20
  11   1   1    0.23    0.22
  11   1   1   -0.03    0.21
  11   1   1   -0.03    0.22
  11   1   1   -0.45    0.22
 -12  -1  -1    9.35    0.56
 -12  -1  -1    9.26    0.48
 -12  -1  -1    8.08    0.48
 -12  -1  -1    8.44    0.64
  12   1   1    8.56    0.59
  12   1   1    8.54    0.54
  12   1   1    7.87    0.55
  12   1   1    6.40    0.58
  12   1   1    8.14    0.53
 -13  -1  -1    0.18    0.39
 -13  -1  -1    0.41    0.26
 -13  -1  -1    0.40    0.22
 -13  -1  -1    0.68    0.29
  13   1   1    0.08    0.31
  13   1   1    0.19    0.28
  13   1   1    0.29    0.33
  13   1   1    0.41    0.29
 -14  -1  -1   -0.16    0.27
 -14  -1  -1   -0.32    0.29
 -14  -1  -1   -0.28    0.21
  14   1   1    0.09    0.32
  14   1   1   -0.06    0.38
  14   1   1    0.27    0.32
  14   1   1    0.09    0.32
 -15  -1  -1    2.24    0.41
 -15  -1  -1    2.46    0.38
 -15  -1  -1    1.72    0.31
  15   1   1    2.17    0.43
  15   1   1    2.68    0.57
  15   1   1    2.66    0.44
 -16  -1  -1    0.30    0.29
 -16  -1  -1   -0.46    0.39
  16   1   1    0.28    0.53
  16   1   1    0.39    0.42
  16   1   1    0.20    0.43
 -17  -1  -1    0.34    0.33
 -17  -1  -1   -0.42    0.44
  17   1   1    0.23    0.59
  17   1   1   -0.90    0.45
  17   1   1    0.18    0.51
 -18  -1  -1    0.12    0.54
 -18  -1  -1    0.13    0.38
  18   1   1   -0.77    0.65
 -19  -1  -1   -0.06    0.63
 -19  -1  -1   -0.87    0.38
  19   1   1   -0.20    0.68
  19  -2  -1    0.86    0.86
  19  -2  -1    0.44    0.76
 -19   2   1   -0.05    0.63
  18  -2  -1   -0.19    0.73
  18  -2  -1    0.18    0.64
 -18   2   1    0.36    0.57
 -18   2   1    0.10    0.43
  17  -2  -1    0.66    0.59
  17  -2  -1    1.35    0.70
 -17   2   1    1.17    0.50
 -17   2   1    0.79    0.37
  16  -2  -1    0.20    0.55
  16  -2  -1    1.08    0.53
 -16   2   1    0.42    0.49
 -16   2   1    0.05    0.31
  15  -2  -1    4.72    0.50
  15  -2  -1    4.15    0.70
  15  -2  -1    6.07    0.75
 -15   2   1    5.12    0.48
 -15   2   1    4.34    0.58
 -14   2   1    0.80    0.26
 -14   2   1    0.37    0.35
  13  -2  -1    1.02    0.34
  13  -2  -1   -0.01    0.43
  13  -2  -1    0.46    0.23
 -13   2   1    0.50    0.21
 -13   2   1    0.32    0.29
  12  -2  -1   21.31    0.92
  12  -2  -1   22.58    1.08
 -12   2   1   20.59    0.74
 -12   2   1   21.39    0.91
  11  -2  -1    3.06    0.37
  11  -2  -1    2.38    0.26
  11  -2  -1    3.25    0.46
 -11   2   1    3.05    0.38
 -11   2   1    2.95    0.31
  10  -2  -1    9.21    0.30
  10  -2  -1    9.72    0.40
  10  -2  -1   10.05    0.56
  10  -2  -1    9.59    0.67
  10  -2  -1    9.51    0.30
 -10   2   1    8.60    0.53
 -10   2   1    9.54    0.43
   9  -2  -1    2.18    0.21
   9  -2  -1    1.96    0.15
   9  -2  -1    2.50    0.30
   9  -2  -1    2.03    0.13
   9  -2  -1    2.58    0.38
  -9   2   1    2.53    0.32
  -9   2   1    2.30    0.31
  -9   2   1    2.47    0.24
   8  -2  -1    0.93    0.24
   8  -2  -1    1.82    0.27
   8  -2  -1    1.49    0.14
   8  -2  -1    1.44    0.11
   8  -2  -1    1.66    0.17
  -8   2   1    1.09    0.21
  -8   2   1    1.47    0.25
  -8   2   1    1.43    0.17
   7  -2  -1    1.79    0.11
   7  -2  -1    2.08    0.17
   7  -2  -1    1.88    0.27
   7  -2  -1    2.33    0.27
   7  -2  -1    2.16    0.16
   7  -2  -1    2.14    0.25
  -7   2   1    1.78    0.21
  -7   2   1    1.82    0.23
  -7   2   1    2.31    0.26
   6  -2  -1   10.39    0.35
   6  -2  -1   10.78    0.45
   6  -2  -1   10.59    0.46
   6  -2  -1   10.83    0.55
   6  -2  -1    9.45    0.38
   6  -2  -1   10.55    0.32
  -6   2   1   10.50    0.47
  -6   2   1   10.82    0.40
  -6   2   1   10.76    0.48
   5  -2  -1    2.50    0.17
   5  -2  -1    2.49    0.18
   5  -2  -1    2.77    0.28
   5  -2  -1    2.67    0.27
   5  -2  -1    2.53    0.24
   5  -2  -1    2.29    0.24
   5  -2  -1    2.44    0.15
  -5   2   1    2.62    0.25
  -5   2   1    2.60    0.24
  -5   2   1    2.86    0.21
   4  -2  -1    0.29    0.11
   4  -2  -1    0.30    0.08
   4  -2  -1    0.29    0.08
   4  -2  -1    0.21    0.14
   4  -2  -1    0.32    0.09
   4  -2  -1    0.25    0.12
   4  -2  -1    0.17    0.13
  -4   2   1    0.33    0.13
  -4   2   1    0.27    0.12
   3  -2  -1    3.16    0.24
   3  -2  -1    3.51    0.20
   3  -2  -1    3.44    0.20
   3  -2  -1    3.38    0.19
   3  -2  -1    3.14    0.23
   3  -2  -1    3.23    0.27
  -3   2   1    3.73    0.24
  -3   2   1    3.21    0.24
   2  -2  -1  121.29    3.12
   2  -2  -1  120.35    3.11
   2  -2  -1  121.44    3.11
   2  -2  -1  121.64    3.07
   2  -2  -1  121.80    3.10
   2  -2  -1  123.58    3.10
  -2   2   1  123.28    3.12
  -2   2   1  121.24    3.14
   1  -2  -1    7.86    0.33
   1  -2  -1    7.89    0.33
   1  -2  -1    7.96    0.32
   1  -2  -1    7.76    0.32
   1  -2  -1    7.79    0.33
   1  -2  -1    7.73    0.31
  -1   2   1    7.12    0.30
  -1   2   1    7.31    0.31
   0  -2  -1    2.33    0.18
   0  -2  -1    2.17    0.20
   0  -2  -1    2.17    0.16
   0  -2  -1    2.19    0.17
   0  -2  -1    2.34    0.19
   0  -2  -1    2.26    0.17
   0  -2  -1    2.52    0.19
   0  -2  -1    2.39    0.20
   0   2   1    2.32    0.19
   0   2   1    2.44    0.18
   0   2   1    2.22    0.15
  -1  -2  -1   41.72    1.20
  -1  -2  -1   43.53    1.14
  -1  -2  -1   43.23    1.19
  -1  -2  -1   44.44    1.23
   1   2   1   42.28    1.18
   1   2   1   40.91    1.16
   1   2   1   40.92    1.15
   1   2   1   41.55    1.09
  -2  -2  -1    2.18    0.12
  -2  -2  -1    2.20    0.18
  -2  -2  -1    2.00    0.22
  -2  -2  -1    2.09    0.18
  -2  -2  -1    2.39    0.24
   2   2   1    2.10    0.20
   2   2   1    2.02    0.12
   2   2   1    2.42    0.20
   2   2   1    2.07    0.22
  -3  -2  -1   25.81    0.87
  -3  -2  -1   28.82    0.88
  -3  -2  -1   27.95    0.72
   3   2   1   28.44    0.86
   3   2   1   28.26    0.89
   3   2   1   28.47    0.90
   3   2   1   28.17    0.87
   3   2   1   29.29    0.75
  -4  -2  -1   17.69    0.58
  -4  -2  -1   17.67    0.61
  -4  -2  -1   16.12    0.61
  -4  -2  -1   17.07    0.46
  -4  -2  -1   15.54    0.64
   4   2   1   16.64    0.59
   4   2   1   16.82    0.63
   4   2   1   16.84    0.62
   4   2   1   17.07    0.46
  -5  -2  -1    0.69    0.17
  -5  -2  -1    0.54    0.17
  -5  -2  -1    0.41    0.07
  -5  -2  -1    0.43    0.14
  -5  -2  -1    0.48    0.17
   5   2   1    0.28    0.15
   5   2   1    0.37    0.14
   5   2   1    0.35    0.16
   5   2   1    0.36    0.14
   5   2   1    0.43    0.06
  -6  -2  -1   10.72    0.44
  -6  -2  -1   10.07    0.47
  -6  -2  -1   10.60    0.36
   6   2   1   10.54    0.46
   6   2   1   10.57    0.34
   6   2   1   10.89    0.50
   6   2   1   10.19    0.50
  -7  -2  -1    0.03    0.17
  -7  -2  -1   -0.11    0.10
  -7  -2  -1    0.15    0.13
  -7  -2  -1    0.01    0.17
   7   2   1    0.38    0.18
   7   2   1    0.04    0.16
   7   2   1    0.30    0.08
   7   2   1    0.03    0.17
  -8  -2  -1   37.00    1.14
  -8  -2  -1   38.04    1.08
  -8  -2  -1   38.03    1.19
  -8  -2  -1   38.80    1.19
   8   2   1   37.61    1.21
   8   2   1   37.61    1.24
   8   2   1   38.08    1.18
   8   2   1   37.45    1.05
  -9  -2  -1    3.14    0.33
  -9  -2  -1    2.98    0.29
  -9  -2  -1    2.59    0.31
  -9  -2  -1    2.55    0.31
   9   2   1    3.12    0.39
   9   2   1    2.88    0.32
   9   2   1    3.15    0.40
   9   2   1    3.09    0.36
 -10  -2  -1    0.66    0.22
 -10  -2  -1    0.59    0.23
 -10  -2  -1    0.68    0.24
 -10  -2  -1    0.23    0.18
  10   2   1    0.49    0.27
  10   2   1    0.29    0.16
  10   2   1    0.35    0.24
  10   2   1    0.53    0.27
 -11  -2  -1    9.06    0.54
 -11  -2  -1    8.72    0.55
 -11  -2  -1    7.95    0.52
 -11  -2  -1    8.59    0.52
  11   2   1    8.25    0.58
  11   2   1    9.49    0.59
  11   2   1    7.97    0.60
  11   2   1    9.23    0.47
  11   2   1    8.08    0.44
 -12  -2  -1    0.13    0.24
 -12  -2  -1    0.17    0.24
 -12  -2  -1    0.26    0.30
  12   2   1   -0.17    0.20
  12   2   1    0.23    0.24
  12   2   1   -0.06    0.29
  12   2   1   -0.10    0.28
 -13  -2  -1    0.00    0.27
 -13  -2  -1   -0.10    0.27
 -13  -2  -1   -0.33    0.34
  13   2   1   -0.41    0.24
  13   2   1   -0.14    0.34
  13   2   1    0.41    0.28
 -14  -2  -1    0.63    0.33
 -14  -2  -1    0.57    0.33
  14   2   1    0.58    0.29
  14   2   1    0.41    0.37
  14   2   1    0.47    0.40
  14   2   1    0.71    0.33
 -15  -2  -1    0.62    0.34
 -15  -2  -1    0.61    0.40
  15   2   1    0.55    0.43
  15   2   1   -0.06    0.32
  15   2   1    0.05    0.47
 -16  -2  -1    0.34    0.36
 -16  -2  -1    0.87    0.49
  16   2   1   -0.24    0.49
  16   2   1    0.46    0.38
  16   2   1   -0.18    0.47
 -17  -2  -1    0.67    0.41
 -17  -2  -1   -0.01    0.48
  17   2   1    0.16    0.60
  17   2   1    0.52    0.55
 -18  -2  -1    0.10    0.51
 -18  -2  -1    0.03    0.45
  18   2   1    0.09    0.68
  18  -3  -1    0.97    0.73
  18  -3  -1    1.41    0.91
 -18   3   1    0.71    0.65
  17  -3  -1    1.08    0.64
  17  -3  -1    0.07    0.77
 -17   3   1    1.15    0.47
 -17   3   1    1.05    0.57
  16  -3  -1    0.74    0.58
  16  -3  -1    1.77    0.64
 -16   3   1    0.87    0.40
 -16   3   1    0.29    0.52
  15  -3  -1    1.78    0.54
  15  -3  -1    0.42    0.62
 -15   3   1    0.96    0.38
 -15   3   1    0.56    0.44
  14  -3  -1    7.18    0.90
  14  -3  -1    4.77    0.51
  14  -3  -1    5.00    0.60
 -14   3   1    3.74    0.53
 -14   3   1    5.57    0.54
  13  -3  -1    0.33    0.37
  13  -3  -1   -0.19    0.27
  13  -3  -1    0.24    0.43
 -13   3   1    0.59    0.30
 -13   3   1    0.37    0.39
  12  -3  -1    0.68    0.23
  12  -3  -1    0.57    0.37
 -12   3   1    0.61    0.26
  11  -3  -1    1.19    0.37
  11  -3  -1    1.65    0.33
  11  -3  -1    1.34    0.24
 -11   3   1    1.49    0.28
 -11   3   1    1.61    0.33
  10  -3  -1    0.22    0.16
  10  -3  -1    0.00    0.07
  10  -3  -1   -0.01    0.09
  10  -3  -1    0.09    0.25
  10  -3  -1    0.70    0.40
 -10   3   1    0.22    0.31
 -10   3   1    0.32    0.22
 -10   3   1   -0.26    0.24
   9  -3  -1    3.20    0.22
   9  -3  -1    2.91    0.16
   9  -3  -1    3.14    0.36
   9  -3  -1    2.99    0.29
   9  -3  -1    2.63    0.42
  -9   3   1    2.78    0.31
  -9   3   1    2.82    0.36
  -9   3   1    2.90    0.37
   8  -3  -1    0.11    0.20
   8  -3  -1   -0.43    0.28
   8  -3  -1    0.04    0.15
   8  -3  -1    0.24    0.12
   8  -3  -1    0.00    0.09
  -8   3   1    0.06    0.17
  -8   3   1    0.36    0.21
  -8   3   1   -0.37    0.25
   7  -3  -1    0.99    0.16
   7  -3  -1    0.81    0.23
   7  -3  -1    0.82    0.21
   7  -3  -1    0.68    0.28
   7  -3  -1    1.03    0.17
   7  -3  -1    0.56    0.25
   7  -3  -1    0.77    0.12
  -7   3   1    0.68    0.24
  -7   3   1    1.20    0.26
  -7   3   1    1.01    0.20
   6  -3  -1   21.91    0.70
   6  -3  -1   22.43    0.80
   6  -3  -1   22.05    0.72
   6  -3  -1   23.17    0.92
  -6   3   1   22.17    0.81
  -6   3   1   21.07    0.74
  -6   3   1   21.22    0.82
   5  -3  -1    8.90    0.39
   5  -3  -1    9.46    0.46
   5  -3  -1    9.63    0.41
   5  -3  -1    9.79    0.47
   5  -3  -1    8.83    0.53
   5  -3  -1    9.75    0.41
  -5   3   1    8.88    0.50
  -5   3   1    9.19    0.44
  -5   3   1    9.41    0.49
   4  -3  -1    0.32    0.21
   4  -3  -1    0.18    0.15
   4  -3  -1    0.38    0.16
   4  -3  -1    0.34    0.16
   4  -3  -1    0.28    0.16
   4  -3  -1    0.22    0.16
   4  -3  -1    0.21    0.19
  -4   3   1    0.13    0.15
  -4   3   1    0.05    0.15
   3  -3  -1   38.26    1.11
   3  -3  -1   37.39    1.12
   3  -3  -1   36.43    1.10
   3  -3  -1   37.39    1.16
   3  -3  -1   36.73    1.17
   3  -3  -1   38.03    1.12
   3  -3  -1   37.00    1.14
  -3   3   1   37.03    1.07
  -3   3   1   35.69    1.12
  -3   3   1   34.83    1.07
   2  -3  -1    0.65    0.17
   2  -3  -1    0.99    0.20
   2  -3  -1    0.83    0.19
   2  -3  -1    1.32    0.24
   2  -3  -1    0.90    0.17
   2  -3  -1    1.10    0.20
   2  -3  -1    0.98    0.19
   2  -3  -1    0.85    0.18
  -2   3   1    0.69    0.17
  -2   3   1    0.92    0.18
   1  -3  -1    0.14    0.16
   1  -3  -1   -0.01    0.13
   1  -3  -1    0.16    0.14
   1  -3  -1    0.05    0.14
   1  -3  -1    0.23    0.15
   1  -3  -1    0.08    0.13
  -1   3   1    0.06    0.15
  -1   3   1   -0.04    0.13
  -1   3   1    0.04    0.14
   0  -3  -1   15.75    0.58
   0  -3  -1   15.22    0.60
   0  -3  -1   16.07    0.63
   0  -3  -1   15.84    0.55
   0  -3  -1   15.65    0.63
   0   3   1   15.04    0.56
   0   3   1   14.68    0.58
  -1  -3  -1    0.86    0.14
  -1  -3  -1    1.02    0.22
  -1  -3  -1    1.02    0.16
  -1  -3  -1    0.84    0.23
  -1  -3  -1    1.16    0.18
  -1  -3  -1    0.88    0.21
   1   3   1    0.86    0.18
   1   3   1    1.12    0.20
   1   3   1    0.86    0.18
  -2  -3  -1   26.06    0.93
  -2  -3  -1   27.09    0.78
  -2  -3  -1   27.80    0.80
  -2  -3  -1   28.00    0.93
  -2  -3  -1   28.03    0.88
  -2  -3  -1   27.57    0.90
   2   3   1   26.38    0.92
   2   3   1   27.13    0.88
   2   3   1   28.22    0.90
  -3  -3  -1    9.15    0.44
  -3  -3  -1    8.01    0.42
  -3  -3  -1    8.19    0.31
  -3  -3  -1    8.87    0.49
  -3  -3  -1    8.74    0.30
   3   3   1    9.06    0.45
   3   3   1    8.75    0.48
   3   3   1    8.28    0.43
  -4  -3  -1    1.59    0.14
  -4  -3  -1    1.75    0.26
  -4  -3  -1    1.87    0.23
  -4  -3  -1    2.10    0.25
  -4  -3  -1    1.80    0.12
   4   3   1    2.28    0.29
   4   3   1    2.14    0.29
   4   3   1    2.07    0.25
  -5  -3  -1    0.29    0.19
  -5  -3  -1    0.28    0.17
  -5  -3  -1    0.21    0.18
   5   3   1    0.17    0.19
   5   3   1    0.03    0.17
   5   3   1    0.47    0.19
  -6  -3  -1   16.47    0.70
  -6  -3  -1   17.42    0.74
  -6  -3  -1   16.72    0.65
   6   3   1   16.73    0.77
   6   3   1   15.82    0.68
   6   3   1   16.24    0.68
   6   3   1   17.32    0.74
  -7  -3  -1    3.02    0.37
  -7  -3  -1    3.17    0.38
  -7  -3  -1    3.09    0.32
   7   3   1    3.46    0.40
   7   3   1    2.52    0.33
   7   3   1    3.62    0.43
  -8  -3  -1    6.18    0.47
  -8  -3  -1    7.28    0.44
   8   3   1    7.05    0.51
   8   3   1    6.37    0.50
   8   3   1    6.68    0.51
  -9  -3  -1    4.40    0.49
  -9  -3  -1    5.03    0.42
   9   3   1    4.52    0.47
   9   3   1    4.91    0.52
   9   3   1    4.48    0.47
   9   3   1    4.34    0.20
   9   3   1    4.11    0.18
 -10  -3  -1   10.20    0.65
 -10  -3  -1   10.23    0.57
  10   3   1    9.28    0.68
  10   3   1    9.77    0.33
  10   3   1    9.14    0.66
  10   3   1    8.68    0.64
  10   3   1   10.12    0.35
 -11  -3  -1    4.80    0.48
 -11  -3  -1    5.15    0.55
  11   3   1    4.53    0.57
  11   3   1    4.78    0.28
  11   3   1    4.73    0.54
  11   3   1    4.85    0.29
 -12  -3  -1   10.69    0.68
 -12  -3  -1   12.24    0.72
  12   3   1   10.52    0.45
  12   3   1   10.55    0.44
  12   3   1   12.17    0.80
 -13  -3  -1    0.59    0.34
 -13  -3  -1    0.54    0.34
  13   3   1    0.48    0.22
  13   3   1    0.14    0.37
  13   3   1    0.27    0.37
 -14  -3  -1    0.60    0.35
  14   3   1    0.57    0.23
  14   3   1    0.12    0.51
 -15  -3  -1    0.18    0.39
 -15  -3  -1    0.35    0.37
  15   3   1    0.35    0.56
  15   3   1    0.05    0.52
 -16  -3  -1    0.09    0.42
 -16  -3  -1    0.54    0.47
  16   3   1   -1.16    0.55
  16   3   1   -0.69    0.60
 -17  -3  -1    0.42    0.55
 -17  -3  -1   -0.21    0.49
  17   3   1   -0.39    0.60
  17   3   1    1.36    0.70
  17  -4  -1    0.74    0.72
  17  -4  -1   -1.14    0.92
 -17   4   1   -1.21    0.66
  16  -4  -1   -0.14    0.78
  16  -4  -1    0.45    0.62
 -16   4   1   -0.41    0.59
 -16   4   1    1.12    0.50
  15  -4  -1   -1.48    0.74
  15  -4  -1   -0.57    0.58
 -15   4   1    0.86    0.45
 -15   4   1   -0.91    0.53
  14  -4  -1    2.29    0.68
  14  -4  -1    3.21    0.57
 -14   4   1    4.07    0.53
 -14   4   1    3.66    0.62
  13  -4  -1    0.73    0.55
  13  -4  -1    0.57    0.46
 -13   4   1    0.79    0.42
 -13   4   1    0.63    0.37
  12  -4  -1    0.43    0.30
  12  -4  -1    0.22    0.40
  12  -4  -1    0.25    0.50
 -12   4   1    0.21    0.32
 -12   4   1   -0.15    0.43
  11  -4  -1    0.20    0.36
  11  -4  -1    0.59    0.28
  11  -4  -1   -0.10    0.46
 -11   4   1    0.30    0.31
 -11   4   1    0.05    0.40
  10  -4  -1    3.46    0.41
  10  -4  -1    3.56    0.45
  10  -4  -1    3.20    0.22
  10  -4  -1    2.87    0.24
 -10   4   1    3.55    0.40
 -10   4   1    3.96    0.56
   9  -4  -1    1.43    0.33
   9  -4  -1    0.82    0.25
   9  -4  -1    1.10    0.19
   9  -4  -1    1.02    0.41
  -9   4   1    0.67    0.27
  -9   4   1    0.70    0.36
  -9   4   1    1.13    0.41
   8  -4  -1    2.57    0.38
   8  -4  -1    2.43    0.27
   8  -4  -1    2.14    0.25
   8  -4  -1    1.92    0.33
   8  -4  -1    2.33    0.48
   8  -4  -1    1.57    0.27
  -8   4   1    1.75    0.37
  -8   4   1    2.30    0.35
  -8   4   1    2.16    0.43
   7  -4  -1    0.85    0.21
   7  -4  -1    1.18    0.28
   7  -4  -1    0.64    0.23
   7  -4  -1    1.17    0.31
   7  -4  -1    0.94    0.37
   7  -4  -1    0.44    0.21
  -7   4   1    0.85    0.27
  -7   4   1    0.46    0.24
   6  -4  -1    0.32    0.20
   6  -4  -1    0.23    0.23
   6  -4  -1    0.32    0.21
   6  -4  -1    0.26    0.26
   6  -4  -1    0.40    0.35
   6  -4  -1    0.40    0.23
  -6   4   1    0.21    0.24
  -6   4   1    0.48    0.23
   5  -4  -1   11.39    0.74
   5  -4  -1   10.86    0.62
   5  -4  -1   11.19    0.54
   5  -4  -1   10.65    0.67
   5  -4  -1   12.12    0.59
   5  -4  -1   11.71    0.59
   5  -4  -1   11.58    0.56
  -5   4   1   11.59    0.58
  -5   4   1   10.36    0.60
   4  -4  -1    9.56    0.58
   4  -4  -1    9.38    0.51
   4  -4  -1   10.21    0.64
   4  -4  -1    9.08    0.52
   4  -4  -1    9.39    0.51
   4  -4  -1    8.80    0.58
   4  -4  -1    8.47    0.51
   4  -4  -1    8.85    0.48
  -4   4   1    8.83    0.48
  -4   4   1    9.08    0.57
  -4   4   1    8.51    0.48
   3  -4  -1    0.09    0.22
   3  -4  -1   -0.13    0.23
   3  -4  -1    0.07    0.20
   3  -4  -1    0.04    0.23
   3  -4  -1    0.10    0.23
   3  -4  -1   -0.09    0.19
   3  -4  -1   -0.04    0.24
  -3   4   1    0.30    0.22
  -3   4   1    0.18    0.19
   2  -4  -1   14.81    0.65
   2  -4  -1   14.96    0.74
   2  -4  -1   15.09    0.64
   2  -4  -1   16.20    0.70
   2  -4  -1   14.59    0.64
   2  -4  -1   15.11    0.65
   2  -4  -1   15.01    0.69
   2  -4  -1   15.69    0.66
  -2   4   1   15.66    0.66
  -2   4   1   16.74    0.71
   1  -4  -1    1.19    0.26
   1  -4  -1    1.25    0.24
   1  -4  -1    1.25    0.26
   1  -4  -1    1.21    0.28
   1  -4  -1    1.12    0.27
   1  -4  -1    1.46    0.27
   1  -4  -1    1.19    0.27
   1  -4  -1    1.15    0.28
  -1   4   1    1.49    0.26
  -1   4   1    0.93    0.23
  -1   4   1    1.06    0.23
   0  -4  -1   17.44    0.72
   0  -4  -1   16.91    0.67
   0  -4  -1   16.29    0.75
   0  -4  -1   16.92    0.67
   0  -4  -1   16.39    0.63
   0  -4  -1   16.13    0.70
   0  -4  -1   16.49    0.77
   0   4   1   16.89    0.66
   0   4   1   16.21    0.71
  -1  -4  -1    7.37    0.44
  -1  -4  -1    7.71    0.49
  -1  -4  -1    6.17    0.51
  -1  -4  -1    8.01    0.40
  -1  -4  -1    7.66    0.43
  -1  -4  -1    7.59    0.57
  -1  -4  -1    8.75    0.53
   1   4   1    7.78    0.50
   1   4   1    7.98    0.46
   1   4   1    7.30    0.51
  -2  -4  -1    0.35    0.26
  -2  -4  -1    0.23    0.14
  -2  -4  -1    0.12    0.22
  -2  -4  -1   -0.10    0.21
   2   4   1   -0.11    0.25
   2   4   1   -0.12    0.19
   2   4   1    0.11    0.25
  -3  -4  -1    1.39    0.17
  -3  -4  -1    1.23    0.16
  -3  -4  -1    1.05    0.25
  -3  -4  -1    1.27    0.27
  -3  -4  -1    1.08    0.30
   3   4   1    1.30    0.28
   3   4   1    0.91    0.26
   3   4   1    1.51    0.26
  -4  -4  -1    1.42    0.27
  -4  -4  -1    1.76    0.36
  -4  -4  -1    1.56    0.17
  -4  -4  -1    1.70    0.30
  -4  -4  -1    1.43    0.18
  -4  -4  -1    2.03    0.39
   4   4   1    1.74    0.31
   4   4   1    1.84    0.30
   4   4   1    1.65    0.31
  -5  -4  -1    3.66    0.40
  -5  -4  -1    3.95    0.47
  -5  -4  -1    3.60    0.45
   5   4   1    3.93    0.47
   5   4   1    4.42    0.46
   5   4   1    4.01    0.47
  -6  -4  -1   12.55    0.72
  -6  -4  -1   11.87    0.64
  -6  -4  -1   12.17    0.66
   6   4   1   11.80    0.67
   6   4   1   11.23    0.68
   6   4   1   11.69    0.67
  -7  -4  -1    1.18    0.28
  -7  -4  -1    1.81    0.37
   7   4   1    1.80    0.38
   7   4   1    1.16    0.31
   7   4   1    1.93    0.40
  -8  -4  -1    0.77    0.27
  -8  -4  -1    1.31    0.37
   8   4   1    1.18    0.37
   8   4   1    1.20    0.38
   8   4   1    1.76    0.39
  -9  -4  -1    0.34    0.37
  -9  -4  -1    0.77    0.29
   9   4   1    0.41    0.40
   9   4   1    0.85    0.38
   9   4   1    0.99    0.41
 -10  -4  -1    0.04    0.30
  10   4   1    0.19    0.34
  10   4   1    0.05    0.40
 -11  -4  -1    4.07    0.53
 -11  -4  -1    3.49    0.45
  11   4   1    4.05    0.60
  11   4   1    3.94    0.57
 -12  -4  -1    1.82    0.45
 -12  -4  -1    1.06    0.39
  12   4   1    2.43    0.51
  12   4   1    1.35    0.51
 -13  -4  -1    0.22    0.38
 -13  -4  -1    0.10    0.43
  13   4   1    0.56    0.48
  13   4   1    0.98    0.58
 -14  -4  -1   -0.07    0.45
 -14  -4  -1   -0.43    0.43
  14   4   1    0.68    0.54
  14   4   1   -0.20    0.60
 -15  -4  -1   -0.05    0.48
 -15  -4  -1    0.70    0.45
  15   4   1    0.29    0.62
  15   4   1   -0.10    0.69
 -16  -4  -1    0.94    0.56
 -16  -4  -1   -0.31    0.55
  16   4   1   -0.74    0.69
  16   4   1    0.22    0.72
  15  -5  -1    1.05    0.91
  15  -5  -1    0.01    0.63
 -15   5   1   -1.07    0.73
  14  -5  -1    0.97    0.57
  14  -5  -1   -1.15    0.82
 -14   5   1   -0.14    0.64
 -14   5   1   -0.62    0.54
  13  -5  -1    0.72    0.55
  13  -5  -1   -0.16    0.74
 -13   5   1   -0.19    0.50
  12  -5  -1    2.68    0.62
  12  -5  -1    1.61    0.51
 -12   5   1    0.72    0.46
 -12   5   1    1.08    0.51
  11  -5  -1    0.17    0.42
  11  -5  -1    0.45    0.62
 -11   5   1   -0.32    0.39
 -11   5   1   -0.13    0.48
  10  -5  -1    0.70    0.57
  10  -5  -1    0.59    0.41
  10  -5  -1    0.78    0.24
 -10   5   1    0.75    0.41
 -10   5   1    0.36    0.45
   9  -5  -1   -0.31    0.29
   9  -5  -1    0.19    0.22
   9  -5  -1   -0.29    0.47
   9  -5  -1    0.07    0.34
  -9   5   1    0.16    0.37
  -9   5   1   -0.47    0.35
   8  -5  -1    0.51    0.37
   8  -5  -1    1.13    0.46
   8  -5  -1    0.56    0.27
   8  -5  -1   -0.26    0.29
  -8   5   1    0.53    0.33
  -8   5   1    0.57    0.41
   7  -5  -1    0.51    0.41
   7  -5  -1    0.62    0.28
   7  -5  -1    0.13    0.45
   7  -5  -1    0.53    0.30
   7  -5  -1   -0.17    0.39
   7  -5  -1    0.52    0.32
  -7   5   1    0.78    0.39
  -7   5   1    0.33    0.33
   6  -5  -1    0.59    0.33
   6  -5  -1    0.22    0.39
   6  -5  -1   -0.17    0.27
   6  -5  -1   -0.09    0.29
   6  -5  -1    0.17    0.30
   6  -5  -1    0.44    0.40
  -6   5   1   -0.09    0.28
   5  -5  -1    0.40    0.42
   5  -5  -1   -0.07    0.30
   5  -5  -1   -0.28    0.28
   5  -5  -1    0.11    0.30
   5  -5  -1    0.10    0.40
   5  -5  -1   -0.03    0.28
  -5   5   1    0.55    0.31
   4  -5  -1    0.59    0.37
   4  -5  -1    0.66    0.31
   4  -5  -1    0.52    0.31
   4  -5  -1    0.30    0.31
   4  -5  -1    0.53    0.38
   4  -5  -1    0.53    0.29
  -4   5   1    0.18    0.31
   3  -5  -1    0.97    0.38
   3  -5  -1    0.51    0.31
   3  -5  -1    0.66    0.39
   3  -5  -1    1.22    0.36
   3  -5  -1    1.44    0.35
   3  -5  -1    0.84    0.39
   3  -5  -1    0.85    0.30
  -3   5   1    1.12    0.32
  -3   5   1    0.84    0.30
   2  -5  -1    0.53    0.31
   2  -5  -1    0.19    0.32
   2  -5  -1   -0.28    0.31
   2  -5  -1    0.41    0.38
   2  -5  -1   -0.24    0.35
   2  -5  -1   -0.06    0.30
   2  -5  -1    0.44    0.28
   2  -5  -1   -0.46    0.34
  -2   5   1    0.27    0.31
   1  -5  -1    0.68    0.36
   1  -5  -1    1.01    0.33
   1  -5  -1    0.83    0.38
   1  -5  -1    1.01    0.32
   1  -5  -1    1.17    0.31
   1  -5  -1    1.03    0.31
   1  -5  -1    1.15    0.33
  -1   5   1    0.93    0.34
  -1   5   1    1.14    0.28
   0  -5  -1    1.48    0.32
   0  -5  -1    1.92    0.41
   0  -5  -1    1.70    0.35
   0  -5  -1    1.96    0.33
   0  -5  -1    1.78    0.40
   0  -5  -1    2.28    0.42
   0   5   1    2.07    0.36
   0   5   1    1.45    0.30
  -1  -5  -1    1.37    0.40
  -1  -5  -1    1.01    0.34
  -1  -5  -1    1.05    0.27
  -1  -5  -1    0.94    0.33
  -1  -5  -1    0.99    0.41
  -1  -5  -1    0.97    0.25
   1   5   1    0.81    0.31
   1   5   1    0.70    0.28
  -2  -5  -1    5.05    0.60
  -2  -5  -1    5.10    0.39
  -2  -5  -1    3.82    0.40
  -2  -5  -1    5.81    0.52
  -2  -5  -1    4.70    0.52
  -2  -5  -1    3.84    0.46
   2   5   1    5.03    0.49
   2   5   1    4.37    0.51
  -3  -5  -1    0.36    0.18
  -3  -5  -1    0.60    0.36
  -3  -5  -1    0.07    0.30
  -3  -5  -1    0.47    0.32
   3   5   1   -0.15    0.39
   3   5   1   -0.11    0.34
   3   5   1    1.05    0.31
  -4  -5  -1    7.20    0.61
  -4  -5  -1    6.72    0.33
  -4  -5  -1    6.57    0.59
  -4  -5  -1    7.13    0.66
  -4  -5  -1    6.25    0.33
   4   5   1    7.59    0.69
   4   5   1    6.80    0.63
   4   5   1    7.31    0.58
  -5  -5  -1    1.18    0.37
  -5  -5  -1    1.44    0.39
  -5  -5  -1    1.56    0.47
   5   5   1    1.80    0.42
   5   5   1    1.41    0.34
   5   5   1    0.68    0.41
  -6  -5  -1    4.67    0.58
   6   5   1    5.01    0.60
  -7  -5  -1    1.23    0.45
  -7  -5  -1    0.86    0.34
   7   5   1    0.66    0.37
   7   5   1    0.81    0.41
  -8  -5  -1    3.03    0.57
  -8  -5  -1    3.64    0.46
   8   5   1    3.89    0.52
   8   5   1    3.13    0.52
  -9  -5  -1   -0.23    0.46
  -9  -5  -1    0.03    0.35
   9   5   1    0.64    0.48
 -10  -5  -1   -0.43    0.44
 -10  -5  -1    0.66    0.43
  10   5   1    1.65    0.50
  10   5   1    1.79    0.54
 -11  -5  -1   -0.17    0.47
 -11  -5  -1    0.08    0.41
  11   5   1    0.45    0.53
  11   5   1    0.33    0.51
 -12  -5  -1    1.07    0.52
 -12  -5  -1    0.51    0.46
  12   5   1    0.94    0.59
  12   5   1    0.72    0.66
 -13  -5  -1   -0.34    0.48
 -13  -5  -1   -0.30    0.56
  13   5   1    1.17    0.71
  13   5   1   -0.26    0.60
 -14  -5  -1    0.23    0.57
 -14  -5  -1   -0.39    0.62
  14   5   1    1.11    0.68
  14   5   1    1.57    0.77
  12  -6  -1    0.00    0.87
  12  -6  -1    1.17    0.90
  12  -6  -1   -0.07    0.63
 -12   6   1   -0.28    0.57
 -12   6   1    0.43    0.73
  11  -6  -1   -0.25    0.74
  11  -6  -1   -0.50    0.74
  11  -6  -1   -0.05    0.55
 -11   6   1    0.25    0.55
 -11   6   1   -0.13    0.60
  10  -6  -1   -0.02    0.65
  10  -6  -1    0.16    0.65
 -10   6   1   -0.17    0.57
 -10   6   1    0.06    0.53
   9  -6  -1   -0.20    0.44
   9  -6  -1    0.58    0.67
   9  -6  -1   -0.39    0.33
   9  -6  -1    0.85    0.64
  -9   6   1    0.35    0.49
   8  -6  -1    1.36    0.61
   8  -6  -1    1.00    0.62
   8  -6  -1    0.62    0.39
   8  -6  -1    0.27    0.46
  -8   6   1    0.43    0.45
   7  -6  -1    0.04    0.40
   7  -6  -1    0.87    0.40
   7  -6  -1    0.49    0.54
   7  -6  -1    0.56    0.62
  -7   6   1    1.09    0.49
   6  -6  -1    0.03    0.40
   6  -6  -1   -0.49    0.40
   6  -6  -1    0.80    0.56
   6  -6  -1   -0.91    0.48
   6  -6  -1    0.14    0.51
   5  -6  -1   -0.07    0.40
   5  -6  -1    0.65    0.50
   5  -6  -1    0.28    0.53
   5  -6  -1   -0.29    0.42
   5  -6  -1    0.07    0.38
   4  -6  -1    6.39    0.72
   4  -6  -1    6.26    0.79
   4  -6  -1    5.73    0.66
   4  -6  -1    6.93    0.80
   4  -6  -1    6.33    0.61
   3  -6  -1    1.83    0.47
   3  -6  -1    1.61    0.41
   3  -6  -1    1.26    0.47
   3  -6  -1    2.68    0.51
  -3   6   1    1.76    0.44
   2  -6  -1    0.20    0.47
   2  -6  -1   -0.22    0.38
   2  -6  -1    0.07    0.39
   2  -6  -1    0.26    0.44
   2  -6  -1    0.13    0.47
  -2   6   1    0.09    0.39
   1  -6  -1    0.00    0.43
   1  -6  -1    0.58    0.49
   1  -6  -1    0.46    0.43
   1  -6  -1    0.71    0.39
   1  -6  -1    0.80    0.42
   1  -6  -1   -0.16    0.44
  -1   6   1    0.54    0.40
   0  -6  -1    3.65    0.54
   0  -6  -1    3.15    0.63
   0  -6  -1    3.30    0.55
   0  -6  -1    3.70    0.46
   0  -6  -1    3.48    0.54
   0   6   1    3.78    0.54
   0   6   1    3.73    0.47
  -1  -6  -1    0.68    0.50
  -1  -6  -1   -0.04    0.40
  -1  -6  -1    0.63    0.43
  -1  -6  -1    0.30    0.34
  -1  -6  -1    0.46    0.33
   1   6   1   -0.13    0.33
  -2  -6  -1    0.65    0.47
  -2  -6  -1   -0.02    0.29
  -2  -6  -1    0.36    0.45
  -2  -6  -1    0.22    0.32
  -2  -6  -1    0.11    0.44
   2   6   1    0.05    0.35
   2   6   1   -0.68    0.45
  -3  -6  -1   -0.48    0.26
  -3  -6  -1    0.42    0.26
  -3  -6  -1    0.30    0.50
  -3  -6  -1   -0.50    0.42
   3   6   1   -0.84    0.43
   3   6   1    0.26    0.38
  -4  -6  -1    0.45    0.42
  -4  -6  -1   -0.28    0.46
   4   6   1   -0.04    0.38
   4   6   1   -0.16    0.46
  -5  -6  -1   -0.55    0.43
  -5  -6  -1    0.49    0.52
   5   6   1    0.78    0.41
   5   6   1   -0.22    0.44
  -6  -6  -1    4.40    0.74
   6   6   1    2.89    0.55
   6   6   1    3.83    0.58
  -7  -6  -1    0.46    0.55
   7   6   1    0.04    0.54
  -8  -6  -1   -0.12    0.61
  -8  -6  -1   -0.12    0.49
   8   6   1    0.38    0.57
   8   6   1    0.15    0.50
  -9  -6  -1    0.20    0.49
  -9  -6  -1    0.43    0.61
   9   6   1    1.07    0.67
   9   6   1    0.39    0.59
 -10  -6  -1    0.73    0.50
 -10  -6  -1    0.41    0.70
  10   6   1    0.81    0.60
  10   6   1    0.10    0.59
 -11  -6  -1    0.19    0.52
 -11  -6  -1    0.17    0.69
  11   6   1   -0.32    0.62
  11   6   1    0.23    0.64
 -12  -6  -1    0.70    0.75
 -12  -6  -1   -0.26    0.57
  12   6   1   -0.24    0.69
  12   6   1    0.34    0.67
   9  -7  -1    0.42    0.94
   9  -7  -1    0.48    0.86
   9  -7  -1    1.60    0.96
  -9   7   1    0.57    0.67
   8  -7  -1    0.25    0.80
   8  -7  -1    0.12    0.85
   8  -7  -1    0.37    0.81
  -8   7   1    1.28    0.72
   7  -7  -1    0.69    0.57
   7  -7  -1   -0.59    0.78
   7  -7  -1   -0.14    0.84
   7  -7  -1    0.33    0.83
   7  -7  -1    0.49    0.57
   6  -7  -1   -0.31    0.56
   6  -7  -1   -0.08    0.61
   6  -7  -1    0.97    0.82
   6  -7  -1   -0.14    0.76
   6  -7  -1   -1.27    0.66
   5  -7  -1   -0.27    0.67
   5  -7  -1    1.34    0.56
   5  -7  -1    1.59    0.60
   5  -7  -1   -0.04    0.73
   5  -7  -1   -0.45    0.69
   4  -7  -1   -0.18    0.61
   4  -7  -1   -0.87    0.59
   4  -7  -1    0.59    0.76
   4  -7  -1    0.68    0.70
   4  -7  -1    0.06    0.51
   3  -7  -1    1.29    0.69
   3  -7  -1    1.52    0.68
   3  -7  -1    0.78    0.57
   3  -7  -1    1.71    0.77
   3  -7  -1    1.27    0.64
   2  -7  -1    0.72    0.54
   2  -7  -1    0.32    0.61
   2  -7  -1    0.46    0.60
   2  -7  -1    0.26    0.51
   2  -7  -1   -0.68    0.63
  -2   7   1    0.31    0.55
   1  -7  -1   -0.17    0.65
   1  -7  -1   -0.11    0.71
   1  -7  -1    0.51    0.49
   1  -7  -1   -0.59    0.53
   1  -7  -1    0.22    0.65
  -1   7   1    0.36    0.52
   0  -7  -1   -0.01    0.48
   0  -7  -1   -0.10    0.55
   0  -7  -1    0.21    0.58
   0  -7  -1   -0.61    0.65
   0   7   1    0.37    0.51
  -1  -7  -1   -0.23    0.61
  -1  -7  -1   -0.24    0.43
  -1  -7  -1    0.18    0.56
  -1  -7  -1    1.50    0.71
   1   7   1    0.30    0.48
   1   7   1    0.14    0.61
  -2  -7  -1   -0.05    0.67
  -2  -7  -1   -0.51    0.56
   2   7   1    0.46    0.49
   2   7   1   -0.10    0.62
  -3  -7  -1    0.49    0.60
  -3  -7  -1   -1.29    0.63
   3   7   1    0.47    0.63
   3   7   1    0.23    0.51
  -4  -7  -1    1.73    0.77
  -4  -7  -1    2.03    0.65
   4   7   1    0.57    0.72
  -5  -7  -1    1.41    0.77
  -5  -7  -1    0.66    0.60
   5   7   1    0.75    0.60
   5   7   1    0.51    0.62
  -6  -7  -1   -0.40    0.79
  -6  -7  -1    0.32    0.62
   6   7   1    0.15    0.61
   6   7   1   -0.27    0.63
  -7  -7  -1    0.74    0.82
  -7  -7  -1    0.71    0.66
   7   7   1    0.16    0.64
   7   7   1   -0.77    0.75
  -8  -7  -1    1.24    0.84
  -8  -7  -1    0.27    0.67
   8   7   1    0.35    0.66
   8   7   1   -0.73    0.70
   9   7  -2    0.08    0.65
   9   7  -2   -1.14    0.76
  -9  -7   2    0.26    0.86
  -9  -7   2    0.91    0.73
   8   7  -2   -0.23    0.75
   8   7  -2    1.53    0.62
  -8  -7   2    0.63    0.70
  -8  -7   2   -0.37    0.76
   7   7  -2   -1.20    0.62
  -7  -7   2    1.16    0.78
  -7  -7   2    0.12    0.65
   6   7  -2   -0.24    0.66
   6   7  -2   -0.32    0.54
  -6  -7   2   -0.06    0.78
  -6  -7   2    0.59    0.67
   5   7  -2    0.27    0.51
   5   7  -2    0.04    0.68
  -5  -7   2    0.99    0.66
  -5  -7   2    0.56    0.74
   4   7  -2    0.32    0.47
   4   7  -2    0.63    0.57
  -4  -7   2    0.38    0.65
  -4  -7   2    0.60    0.65
   3   7  -2    0.13    0.50
   3   7  -2    0.18    0.44
  -3  -7   2    0.17    0.63
  -3  -7   2   -0.08    0.65
   2   7  -2   -0.03    0.58
  -2  -7   2    0.70    0.64
  -2  -7   2    0.06    0.55
  -2  -7   2    0.13    0.75
   1   7  -2   -0.83    0.57
  -1  -7   2    0.36    0.48
  -1  -7   2    0.89    0.69
  -1  -7   2    0.01    0.61
  -1  -7   2   -0.31    0.42
   0   7  -2   -0.44    0.48
   0  -7   2    0.04    0.49
   0  -7   2   -0.74    0.67
   0  -7   2    0.74    0.45
   0  -7   2    1.32    0.65
  -1   7  -2    0.62    0.58
   1  -7   2   -0.01    0.71
   1  -7   2    0.35    0.51
   1  -7   2   -0.93    0.43
   1  -7   2    0.67    0.63
  -2   7  -2    1.00    0.56
   2  -7   2    0.65    0.59
   2  -7   2    0.68    0.75
   2  -7   2   -0.86    0.63
   2  -7   2    0.34    0.47
  -3   7  -2   -0.19    0.65
  -3   7  -2   -0.67    0.53
   3  -7   2    0.73    0.69
   3  -7   2   -1.06    0.60
   3  -7   2   -0.15    0.78
  -4   7  -2    0.42    0.55
   4  -7   2    0.24    0.67
   4  -7   2   -0.25    0.85
   4  -7   2    0.94    0.68
   5  -7   2    0.04    0.75
   5  -7   2    0.18    0.63
   5  -7   2   -0.99    0.77
   5  -7   2    0.44    0.70
  -6   7  -2   -0.05    0.69
   6  -7   2    0.64    0.80
   6  -7   2    1.10    0.77
  -7   7  -2    0.54    0.71
   7  -7   2   -0.25    0.87
   7  -7   2    0.69    0.83
  -8   7  -2    0.04    0.66
   8  -7   2    1.01    0.89
   8  -7   2    0.98    1.00
  13   6  -2    0.22    0.76
  13   6  -2    0.74    0.76
 -13  -6   2   -0.27    0.58
 -13  -6   2   -0.21    0.77
  12   6  -2    0.42    0.68
  12   6  -2    1.11    0.77
 -12  -6   2   -0.20    0.58
 -12  -6   2   -0.68    0.75
  11   6  -2   -0.06    0.62
  11   6  -2    0.73    0.71
 -11  -6   2   -0.19    0.53
 -11  -6   2    1.26    0.73
  10   6  -2    1.01    0.56
  10   6  -2    0.54    0.68
 -10  -6   2    0.93    0.66
 -10  -6   2   -0.43    0.55
   9   6  -2    0.20    0.53
  -9  -6   2    0.94    0.63
  -9  -6   2    0.39    0.53
   8   6  -2    0.14    0.45
   8   6  -2   -0.16    0.46
  -8  -6   2   -0.01    0.53
  -8  -6   2    1.20    0.63
   7   6  -2    0.19    0.45
   7   6  -2   -0.18    0.41
  -7  -6   2    0.45    0.57
  -7  -6   2   -0.09    0.43
   6   6  -2    1.47    0.46
   6   6  -2    2.05    0.55
  -6  -6   2    1.25    0.52
  -6  -6   2    2.39    0.59
   5   6  -2    0.36    0.38
   5   6  -2    1.12    0.49
  -5  -6   2    0.42    0.42
  -5  -6   2    1.35    0.55
  -5  -6   2    0.46    0.48
   4   6  -2    0.27    0.39
   4   6  -2   -0.08    0.36
  -4  -6   2    0.34    0.38
  -4  -6   2    0.01    0.53
  -4  -6   2   -0.03    0.46
  -4  -6   2    0.17    0.22
   3   6  -2    0.12    0.34
   3   6  -2    0.52    0.45
  -3  -6   2    0.24    0.26
  -3  -6   2   -0.11    0.51
  -3  -6   2   -0.10    0.26
  -3  -6   2    0.30    0.37
   2   6  -2   -0.08    0.30
  -2  -6   2   -0.72    0.32
  -2  -6   2    0.12    0.51
  -2  -6   2   -0.14    0.29
   1   6  -2   -0.44    0.39
  -1  -6   2   -0.58    0.50
  -1  -6   2    0.44    0.34
  -1  -6   2    0.12    0.32
  -1  -6   2    0.05    0.35
   0   6  -2    0.16    0.33
   0  -6   2    0.12    0.40
   0  -6   2    0.07    0.33
   0  -6   2   -0.05    0.45
   0  -6   2    0.40    0.36
  -1   6  -2   -0.73    0.35
  -1   6  -2   -0.32    0.38
   1  -6   2    0.01    0.47
   1  -6   2   -0.09    0.31
   1  -6   2    0.14    0.39
   1  -6   2    0.24    0.47
   1  -6   2    0.71    0.51
  -2   6  -2    0.93    0.41
  -2   6  -2    0.66    0.42
   2  -6   2    1.17    0.35
   2  -6   2    0.01    0.50
   2  -6   2    0.86    0.43
   2  -6   2    0.35    0.54
  -3   6  -2    6.53    0.76
  -3   6  -2    6.93    0.67
   3  -6   2    6.32    0.74
   3  -6   2    6.71    0.73
   3  -6   2    6.69    0.75
   3  -6   2    5.88    0.56
  -4   6  -2    0.79    0.46
  -4   6  -2    0.43    0.39
   4  -6   2    0.57    0.57
   4  -6   2    0.62    0.41
   4  -6   2    1.12    0.50
   4  -6   2    0.99    0.35
  -5   6  -2    0.15    0.42
   5  -6   2    0.06    0.34
   5  -6   2    0.44    0.42
   5  -6   2   -0.40    0.41
   5  -6   2    0.26    0.45
   5  -6   2   -0.39    0.59
  -6   6  -2    0.59    0.46
   6  -6   2   -0.13    0.40
   6  -6   2   -0.02    0.35
   6  -6   2   -0.11    0.49
   6  -6   2    0.34    0.64
  -7   6  -2    1.33    0.49
   7  -6   2    1.06    0.40
   7  -6   2    1.83    0.74
   7  -6   2    0.76    0.60
   7  -6   2    0.67    0.39
  -8   6  -2    0.07    0.48
   8  -6   2   -0.25    0.68
   8  -6   2    1.00    0.62
   8  -6   2   -0.31    0.40
  -9   6  -2   -0.98    0.49
   9  -6   2    0.27    0.71
   9  -6   2    0.04    0.44
   9  -6   2    1.26    0.76
 -10   6  -2   -0.30    0.52
  10  -6   2    0.81    0.83
  10  -6   2    1.03    0.53
  10  -6   2   -0.43    0.78
 -11   6  -2    0.81    0.77
 -11   6  -2    0.03    0.60
  11  -6   2    1.32    0.85
  11  -6   2    1.31    0.83
 -12   6  -2   -0.41    0.65
 -12   6  -2    0.19    0.82
  12  -6   2    0.12    0.90
  12  -6   2   -0.80    0.95
  15   5  -2    0.65    0.68
  15   5  -2    0.58    0.68
 -15  -5   2    0.34    0.64
 -15  -5   2   -0.42    0.54
  14   5  -2    0.59    0.61
  14   5  -2    0.22    0.62
 -14  -5   2    0.91    0.51
 -14  -5   2   -0.27    0.60
  13   5  -2    0.06    0.56
  13   5  -2    0.09    0.52
 -13  -5   2    0.51    0.51
 -13  -5   2    0.05    0.55
  12   5  -2    0.00    0.55
  12   5  -2    0.59    0.55
 -12  -5   2    0.31    0.44
 -12  -5   2   -1.28    0.51
  11   5  -2    1.57    0.61
  11   5  -2    1.76    0.51
 -11  -5   2    1.60    0.54
 -11  -5   2    1.55    0.47
  10   5  -2   -0.07    0.42
  10   5  -2    0.27    0.52
 -10  -5   2    0.58    0.46
 -10  -5   2   -0.28    0.38
   9   5  -2    2.65    0.55
   9   5  -2    2.32    0.45
  -9  -5   2    3.16    0.57
  -9  -5   2    1.91    0.46
   8   5  -2    0.97    0.41
   8   5  -2    0.10    0.33
  -8  -5   2    1.03    0.39
  -8  -5   2    0.64    0.46
   7   5  -2    2.57    0.42
  -7  -5   2    2.41    0.42
  -7  -5   2    2.14    0.44
   6   5  -2    1.02    0.32
   6   5  -2    0.88    0.35
  -6  -5   2    0.48    0.34
  -6  -5   2    0.55    0.35
  -6  -5   2    0.51    0.38
   5   5  -2    5.12    0.58
   5   5  -2    6.06    0.52
  -5  -5   2    5.17    0.64
  -5  -5   2    5.12    0.52
  -5  -5   2    6.24    0.65
   4   5  -2    2.36    0.42
   4   5  -2    1.77    0.32
  -4  -5   2    1.88    0.19
  -4  -5   2    1.96    0.31
  -4  -5   2    1.31    0.44
  -4  -5   2    1.86    0.19
  -4  -5   2    2.44    0.42
   3   5  -2    4.66    0.52
   3   5  -2    3.85    0.44
  -3  -5   2    4.40    0.53
  -3  -5   2    4.73    0.35
  -3  -5   2    3.91    0.45
  -3  -5   2    3.91    0.54
   2   5  -2    2.49    0.31
   2   5  -2    2.31    0.42
  -2  -5   2    2.15    0.46
  -2  -5   2    1.68    0.40
  -2  -5   2    2.27    0.32
  -2  -5   2    2.16    0.28
  -2  -5   2    2.23    0.28
   1   5  -2   11.25    0.69
   1   5  -2   10.79    0.54
  -1  -5   2   11.95    0.57
  -1  -5   2   10.88    0.74
  -1  -5   2   11.30    0.59
  -1  -5   2   11.43    0.59
  -1  -5   2   10.56    0.73
  -1  -5   2   11.31    0.75
   0   5  -2    0.89    0.30
   0   5  -2    0.43    0.29
   0  -5   2    0.09    0.24
   0  -5   2    0.44    0.29
   0  -5   2    0.25    0.26
   0  -5   2    0.61    0.39
   0  -5   2    0.29    0.31
   0  -5   2    0.81    0.27
   0  -5   2    0.71    0.30
  -1   5  -2    4.15    0.50
  -1   5  -2    4.56    0.56
   1  -5   2    5.19    0.44
   1  -5   2    4.70    0.54
   1  -5   2    4.90    0.43
   1  -5   2    4.56    0.56
   1  -5   2    4.62    0.51
   1  -5   2    5.08    0.55
  -2   5  -2   -0.22    0.26
  -2   5  -2    0.25    0.30
   2  -5   2    0.06    0.27
   2  -5   2    0.19    0.31
   2  -5   2   -0.04    0.25
   2  -5   2   -0.15    0.31
   2  -5   2    0.01    0.24
   2  -5   2   -0.34    0.38
  -3   5  -2   12.66    0.74
  -3   5  -2   12.95    0.69
   3  -5   2   12.78    0.90
   3  -5   2   13.66    0.71
   3  -5   2   13.99    0.78
   3  -5   2   13.97    0.64
   3  -5   2   15.24    0.87
   3  -5   2   13.82    0.65
  -4   5  -2    0.26    0.30
  -4   5  -2    0.23    0.27
   4  -5   2   -0.21    0.34
   4  -5   2   -0.10    0.28
   4  -5   2   -0.01    0.25
   4  -5   2    0.14    0.23
   4  -5   2    0.68    0.39
  -5   5  -2    3.05    0.37
  -5   5  -2    3.96    0.45
   5  -5   2    4.01    0.60
   5  -5   2    3.09    0.49
   5  -5   2    3.68    0.47
   5  -5   2    3.74    0.41
   5  -5   2    3.74    0.44
   5  -5   2    3.46    0.40
  -6   5  -2    0.35    0.34
   6  -5   2    0.03    0.26
   6  -5   2    0.12    0.41
   6  -5   2   -0.13    0.33
   6  -5   2    0.44    0.26
   6  -5   2    0.26    0.29
  -7   5  -2   -0.34    0.40
  -7   5  -2   -0.11    0.30
   7  -5   2    0.07    0.29
   7  -5   2    0.63    0.49
   7  -5   2    0.37    0.37
   7  -5   2    0.20    0.44
   7  -5   2    0.01    0.23
   7  -5   2    0.38    0.25
  -8   5  -2   -0.03    0.36
  -8   5  -2    0.70    0.42
   8  -5   2    0.89    0.50
   8  -5   2    0.51    0.52
   8  -5   2    0.42    0.24
   8  -5   2    0.86    0.42
   8  -5   2    0.10    0.29
   8  -5   2    0.62    0.23
  -9   5  -2    0.49    0.39
  -9   5  -2    1.08    0.52
   9  -5   2    1.20    0.47
   9  -5   2    0.79    0.37
   9  -5   2    0.81    0.48
 -10   5  -2    0.59    0.47
  10  -5   2    0.07    0.55
  10  -5   2    0.48    0.41
 -11   5  -2   -0.42    0.43
 -11   5  -2    0.60    0.55
  11  -5   2    0.41    0.61
  11  -5   2   -0.26    0.43
 -12   5  -2    0.63    0.49
 -12   5  -2    0.33    0.57
  12  -5   2    0.78    0.76
 -13   5  -2    0.15    0.67
 -13   5  -2    0.26    0.53
  13  -5   2   -0.13    0.71
  13  -5   2    0.66    0.57
 -14   5  -2    0.57    0.69
 -14   5  -2    0.40    0.60
  14  -5   2   -0.32    0.91
  14  -5   2    0.85    0.66
  17   4  -2    1.24    0.80
  17   4  -2    1.37    0.68
 -17  -4   2    0.93    0.55
 -17  -4   2    1.29    0.60
  16   4  -2    0.45    0.65
  16   4  -2    0.54    0.57
 -16  -4   2    0.39    0.52
 -16  -4   2    0.47    0.57
  15   4  -2    0.17    0.58
  15   4  -2    0.86    0.50
 -15  -4   2   -0.23    0.48
 -15  -4   2   -0.12    0.46
  14   4  -2   -0.23    0.47
  14   4  -2    0.12    0.58
 -14  -4   2   -0.38    0.47
 -14  -4   2   -0.27    0.42
  13   4  -2    0.03    0.46
  13   4  -2    1.09    0.48
 -13  -4   2    0.42    0.43
 -13  -4   2    0.09    0.35
  12   4  -2    3.28    0.60
 -12  -4   2    3.25    0.52
  11   4  -2   -0.09    0.32
 -11  -4   2    0.16    0.31
  10   4  -2    0.73    0.31
  10   4  -2    0.62    0.36
 -10  -4   2    0.76    0.32
 -10  -4   2    0.45    0.37
   9   4  -2   10.02    0.71
   9   4  -2   11.23    0.67
  -9  -4   2   11.18    0.77
  -9  -4   2   11.04    0.67
   8   4  -2    1.01    0.29
   8   4  -2    0.99    0.35
  -8  -4   2    1.51    0.39
  -8  -4   2    0.87    0.31
   7   4  -2    0.14    0.31
   7   4  -2    0.14    0.24
  -7  -4   2    0.18    0.25
  -7  -4   2   -0.10    0.31
  -7  -4   2    0.34    0.27
   6   4  -2    2.43    0.38
   6   4  -2    2.47    0.33
  -6  -4   2    2.49    0.35
  -6  -4   2    2.29    0.41
  -6  -4   2    2.86    0.35
   5   4  -2    0.49    0.27
   5   4  -2    1.23    0.25
  -5  -4   2    0.94    0.23
  -5  -4   2    0.54    0.29
  -5  -4   2    0.94    0.28
   4   4  -2    3.70    0.43
   4   4  -2    4.97    0.38
   4   4  -2    4.30    0.45
  -4  -4   2    4.85    0.22
  -4  -4   2    4.95    0.22
  -4  -4   2    4.75    0.36
  -4  -4   2    4.88    0.44
  -4  -4   2    4.13    0.50
   3   4  -2   12.48    0.65
   3   4  -2   11.44    0.62
   3   4  -2   12.41    0.54
  -3  -4   2   12.88    0.46
  -3  -4   2   13.86    0.70
  -3  -4   2   12.05    0.46
  -3  -4   2   12.48    0.54
  -3  -4   2   13.12    0.68
   2   4  -2    1.26    0.22
   2   4  -2    1.61    0.28
  -2  -4   2    1.50    0.27
  -2  -4   2    1.55    0.22
  -2  -4   2    1.30    0.29
  -2  -4   2    1.39    0.19
  -2  -4   2    1.36    0.26
   1   4  -2    6.19    0.43
   1   4  -2    6.42    0.37
   1   4  -2    6.46    0.44
  -1  -4   2    6.58    0.39
  -1  -4   2    6.59    0.49
  -1  -4   2    6.78    0.43
  -1  -4   2    7.52    0.51
  -1  -4   2    6.30    0.50
  -1  -4   2    6.74    0.39
  -1  -4   2    6.32    0.37
   0   4  -2    0.04    0.15
   0   4  -2    0.06    0.21
   0   4  -2    0.10    0.21
   0  -4   2   -0.21    0.18
   0  -4   2   -0.19    0.23
   0  -4   2    0.56    0.22
   0  -4   2    0.00    0.17
   0  -4   2   -0.18    0.19
   0  -4   2   -0.17    0.16
  -1   4  -2    4.31    0.42
  -1   4  -2    3.99    0.37
   1  -4   2    3.87    0.32
   1  -4   2    3.46    0.32
   1  -4   2    4.05    0.40
   1  -4   2    4.03    0.37
   1  -4   2    4.06    0.39
   1  -4   2    4.77    0.45
  -2   4  -2    5.62    0.45
  -2   4  -2    5.42    0.42
   2  -4   2    5.86    0.54
   2  -4   2    5.89    0.39
   2  -4   2    5.49    0.45
   2  -4   2    4.98    0.43
   2  -4   2    5.38    0.35
   2  -4   2    5.70    0.36
  -3   4  -2    2.57    0.29
  -3   4  -2    2.49    0.33
   3  -4   2    2.72    0.36
   3  -4   2    2.21    0.34
   3  -4   2    2.19    0.27
   3  -4   2    2.40    0.30
   3  -4   2    2.13    0.25
   3  -4   2    2.61    0.39
  -4   4  -2    0.01    0.20
  -4   4  -2    0.08    0.23
  -4   4  -2    0.29    0.31
   4  -4   2   -0.05    0.19
   4  -4   2   -0.13    0.23
   4  -4   2    0.05    0.25
   4  -4   2   -0.15    0.18
   4  -4   2    0.33    0.28
   4  -4   2   -0.01    0.19
  -5   4  -2    4.54    0.44
  -5   4  -2    4.31    0.34
  -5   4  -2    4.82    0.48
   5  -4   2    4.21    0.39
   5  -4   2    4.37    0.37
   5  -4   2    4.72    0.47
   5  -4   2    4.53    0.51
   5  -4   2    4.00    0.33
  -6   4  -2    1.72    0.36
  -6   4  -2    1.57    0.31
   6  -4   2    1.22    0.28
   6  -4   2    1.35    0.28
   6  -4   2    1.46    0.22
   6  -4   2    1.12    0.21
   6  -4   2    1.33    0.34
   6  -4   2    1.06    0.24
  -7   4  -2    8.35    0.59
  -7   4  -2    8.38    0.61
  -7   4  -2    8.57    0.56
   7  -4   2    8.72    0.52
   7  -4   2    8.43    0.37
   7  -4   2    8.88    0.73
   7  -4   2    8.64    0.52
  -8   4  -2    0.43    0.32
  -8   4  -2    0.44    0.29
   8  -4   2    0.07    0.12
   8  -4   2    0.39    0.26
   8  -4   2    0.62    0.36
   8  -4   2    0.39    0.11
  -9   4  -2    4.87    0.52
  -9   4  -2    3.87    0.46
   9  -4   2    3.87    0.59
   9  -4   2    3.73    0.42
 -10   4  -2    0.44    0.42
 -10   4  -2    0.29    0.33
  10  -4   2    1.01    0.47
  10  -4   2    0.72    0.32
 -11   4  -2    1.60    0.38
 -11   4  -2    1.61    0.46
  11  -4   2    1.62    0.41
  11  -4   2    1.97    0.59
 -12   4  -2    0.00    0.43
 -12   4  -2   -0.50    0.34
  12  -4   2    0.80    0.42
  12  -4   2    0.48    0.53
 -13   4  -2    1.91    0.60
  13  -4   2    1.97    0.69
 -14   4  -2    0.40    0.47
 -14   4  -2    0.84    0.59
  14  -4   2    1.20    0.73
  14  -4   2    0.78    0.54
 -15   4  -2    1.83    0.57
 -15   4  -2    1.44    0.66
  15  -4   2    1.46    0.64
  15  -4   2    1.48    0.77
 -16   4  -2    0.70    0.72
 -16   4  -2    0.96    0.62
  16  -4   2    1.43    0.96
  16  -4   2    0.24    0.68
  18   3  -2    0.55    0.69
  18   3  -2    1.03    0.72
 -18  -3   2   -0.09    0.59
 -18  -3   2    0.63    0.53
  17   3  -2   -0.19    0.58
  17   3  -2   -0.33    0.62
 -17  -3   2   -0.89    0.45
 -17  -3   2    0.05    0.43
  16   3  -2    0.70    0.55
  16   3  -2    1.02    0.58
 -16  -3   2    1.45    0.45
 -16  -3   2    1.14    0.44
  15   3  -2    0.36    0.52
  15   3  -2    0.61    0.51
 -15  -3   2    0.47    0.42
 -15  -3   2    0.27    0.37
  14   3  -2   -0.50    0.42
  14   3  -2    0.05    0.39
  14   3  -2   -0.01    0.15
 -14  -3   2    0.32    0.38
  13   3  -2    3.93    0.24
  13   3  -2    4.05    0.22
  13   3  -2    3.73    0.54
 -13  -3   2    3.89    0.47
 -13  -3   2    4.51    0.49
  12   3  -2    0.49    0.37
  12   3  -2   -0.21    0.33
 -12  -3   2    0.25    0.28
 -12  -3   2    0.37    0.28
  11   3  -2   11.44    0.71
  11   3  -2   11.47    0.70
 -11  -3   2   12.14    0.68
 -11  -3   2   12.35    0.68
  10   3  -2    0.65    0.27
  10   3  -2    0.97    0.37
 -10  -3   2    0.36    0.27
 -10  -3   2    0.88    0.26
   9   3  -2   -0.36    0.26
   9   3  -2   -0.19    0.22
  -9  -3   2    0.20    0.26
  -9  -3   2   -0.42    0.26
  -9  -3   2   -0.25    0.21
   8   3  -2    0.14    0.25
   8   3  -2    0.29    0.23
   8   3  -2    0.42    0.23
   8   3  -2    0.60    0.34
  -8  -3   2    0.20    0.20
  -8  -3   2    0.65    0.25
  -8  -3   2    0.39    0.22
   7   3  -2    0.27    0.19
   7   3  -2    0.63    0.24
   7   3  -2    0.64    0.24
  -7  -3   2    0.58    0.25
  -7  -3   2    0.20    0.20
  -7  -3   2    0.87    0.23
   6   3  -2    1.62    0.23
   6   3  -2    1.66    0.28
   6   3  -2    1.37    0.27
  -6  -3   2    1.95    0.25
  -6  -3   2    1.70    0.24
  -6  -3   2    1.93    0.30
   5   3  -2   41.67    1.24
   5   3  -2   43.19    1.33
   5   3  -2   42.11    1.33
  -5  -3   2   42.73    1.34
  -5  -3   2   44.77    1.28
  -5  -3   2   44.25    1.39
   4   3  -2    0.18    0.20
   4   3  -2    0.23    0.15
   4   3  -2    0.12    0.18
  -4  -3   2    0.20    0.18
  -4  -3   2    0.25    0.20
  -4  -3   2    0.55    0.20
  -4  -3   2    0.08    0.12
   3   3  -2   34.52    1.03
   3   3  -2   35.24    1.12
   3   3  -2   35.82    1.14
  -3  -3   2   34.40    0.92
  -3  -3   2   35.22    1.14
  -3  -3   2   34.40    1.08
  -3  -3   2   34.39    1.11
  -3  -3   2   34.17    0.92
   2   3  -2    9.60    0.50
   2   3  -2    9.74    0.46
   2   3  -2   10.38    0.48
  -2  -3   2   10.84    0.53
  -2  -3   2   10.51    0.41
  -2  -3   2   10.03    0.52
  -2  -3   2   10.03    0.38
  -2  -3   2   10.25    0.38
   1   3  -2    1.39    0.22
   1   3  -2    0.97    0.19
   1   3  -2    1.51    0.18
   1   3  -2    1.44    0.18
  -1  -3   2    1.27    0.17
  -1  -3   2    1.39    0.16
  -1  -3   2    1.03    0.18
  -1  -3   2    1.27    0.24
  -1  -3   2    1.41    0.16
   0   3  -2    4.28    0.30
   0   3  -2    4.56    0.24
   0   3  -2    4.15    0.30
   0   3  -2    4.74    0.34
   0  -3   2    4.49    0.30
   0  -3   2    4.33    0.30
   0  -3   2    4.49    0.33
   0  -3   2    4.61    0.25
   0  -3   2    4.72    0.36
   0  -3   2    4.25    0.38
  -1   3  -2   17.64    0.66
  -1   3  -2   17.92    0.64
  -1   3  -2   17.76    0.67
   1  -3   2   17.76    0.58
   1  -3   2   18.17    0.58
   1  -3   2   18.58    0.68
   1  -3   2   17.87    0.62
   1  -3   2   18.53    0.66
  -2   3  -2    7.84    0.38
  -2   3  -2    8.10    0.44
  -2   3  -2    7.68    0.43
   2  -3   2    7.10    0.42
   2  -3   2    7.52    0.36
   2  -3   2    7.45    0.34
   2  -3   2    7.75    0.34
   2  -3   2    7.64    0.48
   2  -3   2    7.97    0.42
  -3   3  -2    9.02    0.50
  -3   3  -2    8.19    0.46
  -3   3  -2    8.41    0.39
  -3   3  -2    8.42    0.42
   3  -3   2    8.13    0.36
   3  -3   2    8.76    0.45
   3  -3   2    8.32    0.49
   3  -3   2    8.58    0.36
  -4   3  -2    2.14    0.21
  -4   3  -2    2.12    0.26
  -4   3  -2    2.46    0.35
  -4   3  -2    2.29    0.29
   4  -3   2    2.23    0.31
   4  -3   2    2.05    0.20
   4  -3   2    1.95    0.26
   4  -3   2    2.36    0.24
  -5   3  -2    8.23    0.50
  -5   3  -2    8.64    0.42
  -5   3  -2    7.87    0.45
  -5   3  -2    8.46    0.32
   5  -3   2    7.88    0.40
   5  -3   2    8.57    0.40
   5  -3   2    8.31    0.55
   5  -3   2    7.90    0.32
   5  -3   2    7.69    0.33
  -6   3  -2    0.76    0.21
  -6   3  -2    0.65    0.21
  -6   3  -2    0.73    0.25
   6  -3   2    0.99    0.29
   6  -3   2    0.58    0.18
   6  -3   2    0.66    0.10
   6  -3   2    0.39    0.10
   6  -3   2    0.57    0.17
  -7   3  -2    3.36    0.39
  -7   3  -2    2.94    0.33
  -7   3  -2    2.55    0.29
   7  -3   2    2.38    0.37
   7  -3   2    2.55    0.29
   7  -3   2    2.44    0.13
   7  -3   2    2.58    0.13
   7  -3   2    2.37    0.26
  -8   3  -2   -0.07    0.24
  -8   3  -2    0.02    0.24
  -8   3  -2    0.49    0.23
   8  -3   2   -0.14    0.29
   8  -3   2    0.18    0.20
   8  -3   2   -0.02    0.21
  -9   3  -2    5.60    0.53
  -9   3  -2    5.09    0.42
  -9   3  -2    5.18    0.51
   9  -3   2    5.85    0.46
   9  -3   2    6.15    0.40
   9  -3   2    4.70    0.59
 -10   3  -2    0.03    0.32
 -10   3  -2    0.07    0.24
 -10   3  -2    0.39    0.34
  10  -3   2    0.34    0.24
  10  -3   2    0.02    0.24
  10  -3   2    0.33    0.42
 -11   3  -2    0.46    0.35
 -11   3  -2    0.15    0.27
  11  -3   2    0.27    0.25
  11  -3   2    0.59    0.31
 -12   3  -2    0.38    0.35
 -12   3  -2   -0.01    0.29
  12  -3   2    0.08    0.49
  12  -3   2    0.34    0.35
 -13   3  -2    0.60    0.31
 -13   3  -2    0.06    0.38
  13  -3   2    0.51    0.51
  13  -3   2    0.41    0.40
 -14   3  -2    1.98    0.56
 -14   3  -2    2.65    0.44
  14  -3   2    3.21    0.59
  14  -3   2    1.98    0.65
 -15   3  -2    0.34    0.51
  15  -3   2    0.30    0.52
  15  -3   2    0.38    0.60
 -16   3  -2    0.39    0.61
 -16   3  -2    0.37    0.47
  16  -3   2   -0.61    0.60
  16  -3   2    0.33    0.65
 -17   3  -2    0.17    0.69
 -17   3  -2   -0.39    0.52
  17  -3   2    0.84    0.71
  17  -3   2    0.45    0.77
  19   2  -2    0.54    0.75
  19   2  -2    0.67    0.69
 -19  -2   2    0.86    0.58
 -19  -2   2    0.29    0.47
  18   2  -2    0.30    0.62
  18   2  -2    1.38    0.67
 -18  -2   2    1.63    0.54
 -18  -2   2   -0.15    0.40
  17   2  -2    1.71    0.58
  17   2  -2    1.23    0.41
  17   2  -2    1.91    0.62
 -17  -2   2    1.38    0.38
 -17  -2   2    1.77    0.48
  16   2  -2    0.57    0.47
  16   2  -2   -0.07    0.48
  16   2  -2    0.35    0.34
 -16  -2   2    0.69    0.38
  15   2  -2    4.52    0.48
  15   2  -2    4.11    0.55
  15   2  -2    5.24    0.53
  15   2  -2    4.06    0.58
 -15  -2   2    5.20    0.60
 -15  -2   2    4.83    0.54
  14   2  -2    0.85    0.31
  14   2  -2    1.88    0.41
  14   2  -2    1.94    0.46
  14   2  -2    1.69    0.31
 -14  -2   2    1.46    0.31
 -14  -2   2    1.46    0.36
  13   2  -2    8.90    0.52
  13   2  -2    9.69    0.70
  13   2  -2   10.02    0.71
  13   2  -2   10.57    0.52
 -13  -2   2    9.99    0.62
 -13  -2   2    8.66    0.62
 -13  -2   2   10.02    0.57
  12   2  -2    0.00    0.20
  12   2  -2    0.13    0.18
  12   2  -2   -0.23    0.37
  12   2  -2    0.23    0.29
  12   2  -2    0.23    0.27
 -12  -2   2   -0.02    0.23
 -12  -2   2   -0.09    0.22
 -12  -2   2   -0.05    0.23
  11   2  -2    0.80    0.19
  11   2  -2    0.52    0.33
  11   2  -2    0.76    0.25
  11   2  -2    0.56    0.30
  11   2  -2    0.63    0.18
 -11  -2   2    1.03    0.27
 -11  -2   2    0.67    0.24
 -11  -2   2    0.61    0.22
  10   2  -2    2.44    0.24
  10   2  -2    2.25    0.30
  10   2  -2    2.68    0.23
  10   2  -2    2.32    0.32
 -10  -2   2    2.19    0.34
 -10  -2   2    2.74    0.34
 -10  -2   2    2.75    0.32
 -10  -2   2    2.36    0.29
   9   2  -2    0.07    0.20
   9   2  -2   -0.01    0.18
   9   2  -2    0.23    0.09
   9   2  -2    0.02    0.10
   9   2  -2    0.35    0.22
  -9  -2   2   -0.05    0.17
  -9  -2   2    0.16    0.20
  -9  -2   2    0.41    0.22
  -9  -2   2   -0.12    0.16
   8   2  -2    6.50    0.47
   8   2  -2    6.15    0.24
   8   2  -2    6.58    0.44
   8   2  -2    5.94    0.24
   8   2  -2    5.72    0.38
   8   2  -2    5.87    0.41
  -8  -2   2    6.17    0.38
  -8  -2   2    5.99    0.39
  -8  -2   2    6.74    0.40
   7   2  -2    8.49    0.44
   7   2  -2    9.22    0.28
   7   2  -2    9.28    0.46
   7   2  -2    9.26    0.28
   7   2  -2    9.76    0.50
  -7  -2   2    9.04    0.45
  -7  -2   2    9.26    0.45
  -7  -2   2    9.54    0.46
  -7  -2   2    9.91    0.47
   6   2  -2    4.54    0.31
   6   2  -2    4.70    0.37
   6   2  -2    4.22    0.31
   6   2  -2    4.57    0.36
  -6  -2   2    4.84    0.34
  -6  -2   2    4.53    0.30
  -6  -2   2    5.11    0.31
   5   2  -2   22.17    0.71
   5   2  -2   21.88    0.76
   5   2  -2   21.80    0.75
  -5  -2   2   21.59    0.74
  -5  -2   2   21.99    0.70
  -5  -2   2   22.31    0.75
  -5  -2   2   22.33    0.76
   4   2  -2   12.88    0.51
  -4  -2   2   12.66    0.48
  -4  -2   2   11.69    0.48
  -4  -2   2   13.18    0.45
  -4  -2   2   12.80    0.52
   3   2  -2    0.30    0.13
   3   2  -2    0.36    0.09
   3   2  -2    0.20    0.11
  -3  -2   2    0.31    0.11
  -3  -2   2    0.28    0.14
  -3  -2   2    0.24    0.04
  -3  -2   2    0.29    0.09
  -3  -2   2    0.25    0.05
  -3  -2   2    0.27    0.12
   2   2  -2    0.21    0.07
   2   2  -2    0.11    0.12
   2   2  -2    0.22    0.11
   2   2  -2    0.22    0.06
  -2  -2   2    0.21    0.06
  -2  -2   2    0.27    0.12
  -2  -2   2    0.17    0.10
  -2  -2   2    0.18    0.07
   1   2  -2    0.24    0.07
   1   2  -2    0.16    0.09
   1   2  -2    0.07    0.07
  -1  -2   2    0.10    0.10
  -1  -2   2    0.16    0.06
  -1  -2   2    0.33    0.08
  -1  -2   2    0.18    0.09
   0   2  -2   24.63    0.74
   0   2  -2   24.98    0.75
   0   2  -2   24.86    0.68
   0   2  -2   25.60    0.76
   0  -2   2   24.61    0.79
   0  -2   2   23.45    0.73
   0  -2   2   25.71    0.73
   0  -2   2   24.37    0.67
  -1   2  -2    1.44    0.14
  -1   2  -2    1.52    0.18
  -1   2  -2    1.46    0.17
   1  -2   2    1.34    0.12
   1  -2   2    1.15    0.17
   1  -2   2    1.65    0.13
   1  -2   2    1.67    0.19
   1  -2   2    1.61    0.14
  -2   2  -2    0.37    0.09
  -2   2  -2    0.45    0.09
  -2   2  -2    0.35    0.12
  -2   2  -2    0.42    0.12
   2  -2   2    0.49    0.11
   2  -2   2    0.32    0.08
   2  -2   2    0.36    0.12
   2  -2   2    0.36    0.08
   2  -2   2    0.31    0.13
  -3   2  -2    3.63    0.26
  -3   2  -2    3.75    0.22
  -3   2  -2    3.31    0.28
  -3   2  -2    3.67    0.18
  -3   2  -2    4.05    0.24
   3  -2   2    3.91    0.23
   3  -2   2    4.12    0.21
   3  -2   2    3.89    0.30
   3  -2   2    3.80    0.18
   3  -2   2    3.95    0.27
  -4   2  -2   22.13    0.70
  -4   2  -2   22.99    0.77
  -4   2  -2   22.24    0.62
  -4   2  -2   22.86    0.71
   4  -2   2   22.32    0.60
   4  -2   2   22.31    0.67
   4  -2   2   22.24    0.80
  -5   2  -2    4.95    0.34
  -5   2  -2    4.93    0.29
  -5   2  -2    4.60    0.28
   5  -2   2    5.83    0.39
   5  -2   2    4.84    0.15
   5  -2   2    4.55    0.16
   5  -2   2    4.92    0.26
  -6   2  -2    0.87    0.21
  -6   2  -2    1.20    0.20
  -6   2  -2    1.12    0.17
   6  -2   2    1.07    0.17
   6  -2   2    1.17    0.23
  -7   2  -2    2.00    0.25
  -7   2  -2    1.38    0.19
  -7   2  -2    1.66    0.25
   7  -2   2    2.04    0.20
   7  -2   2    1.78    0.30
   7  -2   2    1.54    0.22
  -8   2  -2   11.43    0.47
  -8   2  -2   11.92    0.59
  -8   2  -2   10.49    0.53
   8  -2   2   11.68    0.45
   8  -2   2   10.44    0.51
   8  -2   2   10.72    0.64
  -9   2  -2    5.64    0.37
  -9   2  -2    6.29    0.46
  -9   2  -2    5.30    0.45
   9  -2   2    6.48    0.44
   9  -2   2    5.50    0.54
 -10   2  -2    3.73    0.43
 -10   2  -2    3.79    0.42
 -10   2  -2    3.16    0.34
  10  -2   2    3.66    0.41
  10  -2   2    2.64    0.39
  10  -2   2    2.74    0.29
 -11   2  -2    7.51    0.45
 -11   2  -2    7.44    0.55
 -11   2  -2    7.38    0.62
  11  -2   2    7.00    0.56
  11  -2   2    6.78    0.69
  11  -2   2    6.12    0.42
 -12   2  -2    7.08    0.49
 -12   2  -2    7.84    0.65
  12  -2   2    7.27    0.62
  12  -2   2    5.71    0.47
  12  -2   2    7.53    0.73
 -13   2  -2    1.41    0.30
 -13   2  -2    1.19    0.39
  13  -2   2    1.03    0.39
 -14   2  -2    0.43    0.41
 -14   2  -2    0.12    0.26
  14  -2   2    0.49    0.44
  14  -2   2    0.15    0.50
 -15   2  -2   -0.33    0.31
 -15   2  -2    0.32    0.40
  15  -2   2    0.77    0.59
  15  -2   2   -0.73    0.48
 -16   2  -2    0.52    0.47
  16  -2   2    0.21    0.68
  16  -2   2    0.47    0.58
 -17   2  -2    1.68    0.48
 -17   2  -2    2.69    0.65
  17  -2   2    2.30    0.64
  17  -2   2    0.71    0.70
 -18   2  -2    0.20    0.49
 -18   2  -2    0.52    0.75
  18  -2   2   -0.32    0.84
  18  -2   2    1.27    0.75
  19   1  -2   -0.41    0.68
 -19  -1   2    0.62    0.61
 -19  -1   2   -0.06    0.34
  18   1  -2    1.77    0.54
  18   1  -2    1.20    0.63
  18   1  -2    1.02    0.51
 -18  -1   2    1.93    0.55
 -18  -1   2    1.91    0.39
  17   1  -2   -0.03    0.44
  17   1  -2   -0.06    0.46
  17   1  -2    0.42    0.51
 -17  -1   2   -0.13    0.37
 -17  -1   2    0.24    0.28
  16   1  -2    8.38    0.84
  16   1  -2    5.35    0.58
  16   1  -2    7.49    0.74
 -16  -1   2    7.32    0.51
 -16  -1   2    8.16    0.60
 -16  -1   2    8.62    0.73
  15   1  -2    0.36    0.37
  15   1  -2    1.04    0.40
  15   1  -2    0.75    0.36
  15   1  -2    0.61    0.35
 -15  -1   2    1.05    0.35
 -15  -1   2    1.05    0.26
 -15  -1   2    1.36    0.30
  14   1  -2   -0.33    0.32
  14   1  -2    0.04    0.31
  14   1  -2    0.68    0.36
  14   1  -2    0.73    0.35
  14   1  -2   -0.16    0.31
 -14  -1   2    0.20    0.30
 -14  -1   2    0.60    0.23
 -14  -1   2   -0.17    0.25
  13   1  -2    5.62    0.50
  13   1  -2    5.68    0.55
  13   1  -2    5.73    0.51
  13   1  -2    5.82    0.50
  13   1  -2    6.40    0.58
 -13  -1   2    6.06    0.40
 -13  -1   2    5.94    0.44
 -13  -1   2    6.02    0.51
  12   1  -2    0.16    0.23
  12   1  -2    0.01    0.23
  12   1  -2   -0.23    0.26
  12   1  -2    0.17    0.23
  12   1  -2    0.14    0.25
 -12  -1   2    0.24    0.18
 -12  -1   2    0.09    0.20
 -12  -1   2    0.15    0.22
  11   1  -2    1.05    0.23
  11   1  -2    1.13    0.25
  11   1  -2    0.67    0.22
  11   1  -2    1.09    0.27
  11   1  -2    0.82    0.26
 -11  -1   2    1.33    0.20
 -11  -1   2    0.87    0.20
 -11  -1   2    0.86    0.21
  10   1  -2    1.45    0.25
  10   1  -2    1.61    0.23
  10   1  -2    1.44    0.24
  10   1  -2    1.35    0.24
  10   1  -2    1.66    0.23
 -10  -1   2    1.25    0.21
 -10  -1   2    1.19    0.19
 -10  -1   2    1.91    0.31
 -10  -1   2    1.37    0.21
   9   1  -2   -0.03    0.16
   9   1  -2   -0.03    0.16
   9   1  -2    0.01    0.14
   9   1  -2   -0.16    0.16
  -9  -1   2   -0.10    0.12
  -9  -1   2   -0.01    0.14
  -9  -1   2   -0.16    0.14
   8   1  -2    2.22    0.24
   8   1  -2    2.37    0.26
   8   1  -2    2.56    0.21
   8   1  -2    2.16    0.25
  -8  -1   2    2.44    0.22
  -8  -1   2    2.27    0.22
  -8  -1   2    2.18    0.22
   7   1  -2    1.02    0.16
   7   1  -2    0.91    0.14
   7   1  -2    1.10    0.13
   7   1  -2    1.12    0.17
   7   1  -2    1.03    0.16
  -7  -1   2    0.96    0.17
  -7  -1   2    1.12    0.16
  -7  -1   2    1.07    0.15
  -7  -1   2    1.16    0.15
   6   1  -2   14.75    0.46
   6   1  -2   14.80    0.52
   6   1  -2   14.51    0.46
   6   1  -2   14.73    0.53
  -6  -1   2   15.29    0.51
  -6  -1   2   14.57    0.53
  -6  -1   2   14.14    0.50
  -6  -1   2   14.69    0.51
   5   1  -2   32.79    0.93
   5   1  -2   31.71    0.92
   5   1  -2   31.85    0.86
   5   1  -2   31.36    0.85
  -5  -1   2   30.37    0.91
  -5  -1   2   32.17    0.91
  -5  -1   2   32.37    0.91
   4   1  -2    9.24    0.28
   4   1  -2    9.84    0.35
   4   1  -2    9.52    0.34
   4   1  -2    9.17    0.36
   4   1  -2   10.04    0.36
   4   1  -2    9.28    0.29
  -4  -1   2    9.78    0.29
  -4  -1   2   10.18    0.36
  -4  -1   2    9.54    0.36
  -4  -1   2    9.57    0.35
   3   1  -2  221.61    5.54
   3   1  -2  223.58    5.51
   3   1  -2  229.55    5.42
   3   1  -2  213.48    5.49
  -3  -1   2  212.79    5.48
  -3  -1   2  225.85    5.53
  -3  -1   2  218.42    5.45
  -3  -1   2  223.35    5.42
  -3  -1   2  224.34    5.51
  -3  -1   2  227.31    5.47
   2   1  -2    5.00    0.21
   2   1  -2    5.00    0.18
   2   1  -2    5.06    0.16
  -2  -1   2    5.16    0.18
  -2  -1   2    5.20    0.23
  -2  -1   2    5.12    0.21
  -2  -1   2    5.41    0.22
   1   1  -2    7.89    0.27
   1   1  -2    7.65    0.22
   1   1  -2    7.54    0.24
   1   1  -2    7.35    0.29
  -1  -1   2    7.55    0.25
  -1  -1   2    6.81    0.26
  -1  -1   2    5.74    0.19
  -1  -1   2    7.55    0.25
   0   1  -2  421.28   10.41
   0   1  -2  431.83   10.28
   0   1  -2  429.51   10.42
   0   1  -2  393.94   10.20
   0  -1   2  437.74   10.61
   0  -1   2  442.70   10.50
   0  -1   2  418.03   10.73
  -1   1  -2   10.73    0.32
  -1   1  -2   10.78    0.37
  -1   1  -2   11.09    0.31
  -1   1  -2   10.92    0.37
  -1   1  -2   10.62    0.34
   1  -1   2   10.80    0.31
   1  -1   2   10.23    0.37
   1  -1   2   11.33    0.34
   1  -1   2   11.30    0.37
  -2   1  -2   48.72    1.33
  -2   1  -2   49.97    1.27
  -2   1  -2   48.73    1.26
  -2   1  -2   49.88    1.32
  -2   1  -2   48.32    1.23
   2  -1   2   50.96    1.26
   2  -1   2   51.03    1.34
   2  -1   2   51.56    1.30
   2  -1   2   48.59    1.30
  -3   1  -2   97.30    2.53
  -3   1  -2  101.67    2.61
  -3   1  -2  100.93    2.50
   3  -1   2  105.73    2.65
   3  -1   2   99.44    2.62
   3  -1   2  105.89    2.59
  -4   1  -2    0.42    0.10
  -4   1  -2    0.58    0.13
  -4   1  -2    0.51    0.11
   4  -1   2    0.28    0.12
   4  -1   2    0.53    0.09
   4  -1   2    0.47    0.09
  -5   1  -2   58.43    1.62
  -5   1  -2   61.64    1.55
  -5   1  -2   57.74    1.67
   5  -1   2   57.58    1.54
   5  -1   2   60.75    1.59
   5  -1   2   57.56    1.66
  -6   1  -2   24.24    0.77
  -6   1  -2   22.58    0.77
  -6   1  -2   24.64    0.71
  -6   1  -2   23.71    0.83
   6  -1   2   25.72    0.86
   6  -1   2   24.96    0.72
   6  -1   2   23.89    0.79
  -7   1  -2   27.37    0.87
  -7   1  -2   25.70    0.78
  -7   1  -2   25.16    0.87
   7  -1   2   24.23    0.82
   7  -1   2   25.02    0.90
   7  -1   2   25.17    0.74
  -8   1  -2   30.29    0.99
  -8   1  -2   29.97    0.89
  -8   1  -2   30.28    0.99
   8  -1   2   30.02    1.00
   8  -1   2   31.40    1.08
   8  -1   2   31.79    0.92
  -9   1  -2    0.76    0.18
  -9   1  -2    0.63    0.15
   9  -1   2    0.83    0.29
   9  -1   2    0.63    0.21
   9  -1   2    0.33    0.15
 -10   1  -2   20.22    0.54
 -10   1  -2   21.04    0.71
 -10   1  -2   20.98    0.82
  10  -1   2   21.99    0.86
  10  -1   2   22.23    0.93
 -11   1  -2    2.23    0.25
 -11   1  -2    2.42    0.12
 -11   1  -2    2.45    0.33
 -11   1  -2    2.44    0.15
  11  -1   2    3.28    0.42
  11  -1   2    2.59    0.40
  11  -1   2    1.71    0.26
 -12   1  -2    1.13    0.31
 -12   1  -2    1.27    0.24
 -12   1  -2    0.90    0.10
  12  -1   2    1.20    0.36
  12  -1   2    0.97    0.28
  12  -1   2    1.12    0.37
 -13   1  -2    0.19    0.20
 -13   1  -2    0.52    0.33
  13  -1   2    0.53    0.38
  13  -1   2    0.21    0.32
  13  -1   2    0.52    0.31
 -14   1  -2    0.37    0.33
 -14   1  -2   -0.24    0.21
  14  -1   2    0.23    0.38
  14  -1   2   -0.26    0.38
 -15   1  -2    0.46    0.39
 -15   1  -2    0.44    0.28
  15  -1   2    0.64    0.41
  15  -1   2    0.48    0.46
 -16   1  -2    1.67    0.49
  16  -1   2    1.77    0.60
  16  -1   2    2.62    0.62
 -17   1  -2    0.20    0.36
 -17   1  -2    0.51    0.51
  17  -1   2   -0.15    0.65
  17  -1   2    0.64    0.61
 -18   1  -2    1.10    0.45
 -18   1  -2    0.01    0.59
  18  -1   2    1.69    0.71
  18  -1   2    1.74    0.77
  20   0  -2    1.33    0.80
  20   0  -2    1.96    0.84
 -20   0   2    0.63    0.70
  19   0  -2    0.32    0.63
  19   0  -2    0.35    0.68
 -19   0   2   -0.25    0.51
 -19   0   2    0.08    0.35
  18   0  -2    1.13    0.59
  18   0  -2   -0.16    0.52
 -18   0   2   -0.04    0.31
 -18   0   2    0.52    0.51
  17   0  -2   -0.06    0.52
  17   0  -2   -0.29    0.53
  17   0  -2    0.44    0.38
 -17   0   2    0.09    0.25
 -17   0   2    0.31    0.40
  16   0  -2    2.32    0.40
  16   0  -2    2.91    0.52
  16   0  -2    2.28    0.50
 -16   0   2    2.09    0.27
 -16   0   2    1.59    0.38
  15   0  -2   -0.18    0.38
  15   0  -2   -0.22    0.27
  15   0  -2   -0.58    0.35
  15   0  -2    0.25    0.39
 -15   0   2    0.02    0.19
 -15   0   2   -0.03    0.33
 -15   0   2   -0.15    0.19
  14   0  -2   12.80    0.63
  14   0  -2   12.42    0.78
  14   0  -2   14.30    0.81
  14   0  -2   12.89    0.77
  14   0  -2   10.17    0.62
 -14   0   2   12.69    0.73
 -14   0   2   13.01    0.53
 -14   0   2   13.42    0.53
  13   0  -2    0.04    0.29
  13   0  -2   -0.38    0.30
  13   0  -2    0.17    0.22
  13   0  -2   -0.12    0.25
  13   0  -2    0.01    0.29
 -13   0   2    0.31    0.16
 -13   0   2    0.12    0.14
 -13   0   2   -0.21    0.20
  12   0  -2    8.35    0.45
  12   0  -2    7.36    0.47
  12   0  -2    7.78    0.54
  12   0  -2    7.36    0.57
  12   0  -2    8.36    0.53
 -12   0   2    7.76    0.37
 -12   0   2    7.77    0.51
 -12   0   2    8.30    0.38
  11   0  -2    0.17    0.22
  11   0  -2    0.04    0.18
  11   0  -2    0.16    0.21
  11   0  -2   -0.04    0.15
 -11   0   2    0.07    0.12
 -11   0   2   -0.03    0.16
 -11   0   2   -0.24    0.12
  10   0  -2    7.53    0.47
  10   0  -2    6.84    0.45
  10   0  -2    6.70    0.36
  10   0  -2    6.83    0.44
  10   0  -2    7.11    0.35
 -10   0   2    6.90    0.42
 -10   0   2    7.10    0.31
 -10   0   2    6.53    0.31
   9   0  -2    0.30    0.12
   9   0  -2   -0.03    0.15
   9   0  -2   -0.02    0.13
   9   0  -2    0.00    0.14
   9   0  -2   -0.03    0.16
  -9   0   2   -0.04    0.09
  -9   0   2    0.04    0.14
   8   0  -2   25.38    0.75
   8   0  -2   25.34    0.83
   8   0  -2   24.52    0.83
   8   0  -2   24.14    0.81
  -8   0   2   23.97    0.71
  -8   0   2   25.08    0.71
  -8   0   2   25.09    0.81
   7   0  -2   -0.02    0.08
   7   0  -2   -0.06    0.10
   7   0  -2   -0.10    0.08
   7   0  -2    0.05    0.12
  -7   0   2    0.11    0.07
  -7   0   2   -0.04    0.10
  -7   0   2   -0.09    0.06
  -7   0   2   -0.13    0.11
   6   0  -2  193.92    4.92
   6   0  -2  201.69    4.86
   6   0  -2  195.87    4.97
   6   0  -2  198.28    4.95
  -6   0   2  204.44    5.03
  -6   0   2  200.93    5.06
  -6   0   2  198.84    4.99
  -6   0   2  199.41    4.92
   5   0  -2    0.02    0.08
   5   0  -2   -0.02    0.05
   5   0  -2   -0.11    0.07
   5   0  -2   -0.04    0.05
   5   0  -2    0.06    0.05
  -5   0   2   -0.02    0.04
  -5   0   2    0.03    0.05
  -5   0   2    0.00    0.08
   4   0  -2  626.81   15.36
   4   0  -2  623.62   15.08
   4   0  -2  641.43   15.29
   4   0  -2  601.08   15.29
   4   0  -2  592.06   15.31
  -4   0   2  597.80   14.85
  -4   0   2  633.13   14.79
  -4   0   2  621.35   14.99
  -4   0   2  601.07   15.00
  -4   0   2  561.45   14.74
   3   0  -2   -0.08    0.03
   3   0  -2   -0.09    0.02
   3   0  -2   -0.09    0.04
   3   0  -2   -0.03    0.04
   3   0  -2   -0.07    0.05
  -3   0   2   -0.08    0.04
  -3   0   2   -0.11    0.05
  -3   0   2   -0.05    0.02
  -3   0   2   -0.09    0.04
  -3   0   2   -0.03    0.03
  -2   0  -2   89.84    2.30
  -2   0  -2   93.23    2.32
  -2   0  -2   97.07    2.30
  -2   0  -2   88.57    2.27
  -2   0  -2   91.18    2.33
   2   0   2   94.08    2.29
   2   0   2   88.29    2.32
   2   0   2   93.28    2.28
  -3   0  -2   -0.01    0.06
  -3   0  -2    0.02    0.05
  -3   0  -2   -0.03    0.07
  -3   0  -2   -0.10    0.04
  -3   0  -2    0.01    0.04
   3   0   2   -0.01    0.05
   3   0   2    0.01    0.05
   3   0   2   -0.03    0.04
   3   0   2   -0.05    0.05
   3   0   2    0.05    0.07
  -4   0  -2   74.29    1.87
  -4   0  -2   69.81    1.89
  -4   0  -2   73.68    1.93
  -4   0  -2   76.56    1.95
   4   0   2   69.38    1.87
   4   0   2   71.80    1.82
   4   0   2   70.03    1.81
   4   0   2   72.67    1.83
  -5   0  -2   -0.02    0.06
  -5   0  -2   -0.02    0.08
  -5   0  -2    0.00    0.09
  -5   0  -2   -0.03    0.06
   5   0   2   -0.12    0.09
   5   0   2   -0.06    0.06
   5   0   2   -0.07    0.06
   5   0   2    0.01    0.10
  -6   0  -2  270.94    6.77
  -6   0  -2  272.69    6.68
  -6   0  -2  271.60    6.74
  -6   0  -2  272.93    6.83
   6   0   2  276.20    6.71
   6   0   2  261.64    6.78
   6   0   2  274.58    6.78
   6   0   2  264.48    6.66
   6   0   2  274.70    6.72
  -7   0  -2   -0.02    0.09
  -7   0  -2    0.00    0.08
  -7   0  -2    0.10    0.12
  -7   0  -2   -0.06    0.15
   7   0   2   -0.12    0.09
   7   0   2    0.25    0.16
   7   0   2    0.10    0.09
   7   0   2    0.11    0.12
   7   0   2    0.01    0.15
  -8   0  -2    3.28    0.20
  -8   0  -2    2.65    0.30
  -8   0  -2    3.13    0.23
  -8   0  -2    2.50    0.27
   8   0   2    2.88    0.32
   8   0   2    2.88    0.21
   8   0   2    2.67    0.31
  -9   0  -2    0.09    0.13
  -9   0  -2    0.07    0.21
  -9   0  -2    0.21    0.11
  -9   0  -2   -0.19    0.14
   9   0   2   -0.11    0.17
   9   0   2   -0.04    0.20
   9   0   2    0.20    0.16
   9   0   2   -0.02    0.13
 -10   0  -2    8.61    0.56
 -10   0  -2    7.03    0.33
 -10   0  -2    7.37    0.45
 -10   0  -2    7.37    0.37
  10   0   2    6.97    0.51
  10   0   2    7.81    0.39
  10   0   2    8.03    0.48
  10   0   2    6.29    0.41
  10   0   2    7.74    0.44
 -11   0  -2   -0.26    0.30
 -11   0  -2    0.03    0.15
 -11   0  -2    0.03    0.20
 -11   0  -2    0.24    0.16
  11   0   2   -0.11    0.22
  11   0   2   -0.12    0.18
  11   0   2    0.35    0.27
  11   0   2   -0.05    0.24
 -12   0  -2    3.94    0.40
 -12   0  -2    3.72    0.49
 -12   0  -2    3.67    0.33
 -12   0  -2    3.96    0.28
  12   0   2    2.84    0.42
  12   0   2    3.42    0.33
  12   0   2    4.38    0.48
  12   0   2    3.80    0.46
 -13   0  -2    0.13    0.18
 -13   0  -2    0.26    0.29
 -13   0  -2   -0.06    0.17
  13   0   2    0.23    0.34
  13   0   2   -0.16    0.22
  13   0   2    0.36    0.32
 -14   0  -2   -0.13    0.20
 -14   0  -2    0.45    0.20
 -14   0  -2   -0.15    0.29
  14   0   2    0.24    0.37
  14   0   2   -0.02    0.26
  14   0   2   -0.47    0.38
 -15   0  -2    0.02    0.25
 -15   0  -2    0.06    0.40
  15   0   2   -0.04    0.42
  15   0   2    0.27    0.28
  15   0   2   -0.27    0.41
 -16   0  -2    0.00    0.36
 -16   0  -2    0.24    0.44
  16   0   2    0.44    0.45
  16   0   2    0.30    0.31
 -17   0  -2    0.08    0.33
 -17   0  -2   -0.24    0.44
  17   0   2    0.36    0.58
  17   0   2   -0.31    0.54
 -18   0  -2    0.28    0.53
 -18   0  -2    0.40    0.38
  18   0   2    1.52    0.70
  18   0   2   -0.54    0.62
 -19   0  -2    0.52    0.44
 -19   0  -2   -0.30    0.60
  19   0   2    0.35    0.73
  19   0   2   -0.65    0.82
  19  -1  -2   -0.64    0.63
  19  -1  -2   -0.02    0.77
 -19   1   2    0.86    0.57
 -19   1   2   -0.09    0.36
  18  -1  -2    1.45    0.66
  18  -1  -2    0.66    0.61
 -18   1   2    1.19    0.49
 -18   1   2    0.90    0.34
  17  -1  -2    0.06    0.52
  17  -1  -2   -0.53    0.56
 -17   1   2    0.04    0.28
 -17   1   2    0.01    0.43
  16  -1  -2    6.55    0.76
  16  -1  -2    8.87    0.67
  16  -1  -2    7.56    0.83
  16  -1  -2    6.90    0.49
 -16   1   2    6.17    0.65
 -16   1   2    6.90    0.50
  15  -1  -2    1.12    0.40
  15  -1  -2    1.20    0.36
  15  -1  -2    0.83    0.25
  15  -1  -2    1.51    0.50
 -15   1   2    0.32    0.33
 -15   1   2    1.13    0.26
  14  -1  -2    0.64    0.36
  14  -1  -2   -0.05    0.28
  14  -1  -2    0.11    0.22
  14  -1  -2   -0.07    0.34
 -14   1   2    0.13    0.19
 -14   1   2    0.08    0.29
  13  -1  -2    6.91    0.59
  13  -1  -2    6.17    0.65
 -13   1   2    5.10    0.28
 -13   1   2    5.11    0.47
 -13   1   2    5.43    0.35
  12  -1  -2   -0.04    0.25
  12  -1  -2   -0.40    0.31
  12  -1  -2    0.34    0.19
 -12   1   2    0.15    0.12
 -12   1   2    0.12    0.24
 -12   1   2   -0.01    0.14
  11  -1  -2    1.23    0.20
  11  -1  -2    1.26    0.33
  11  -1  -2    0.89    0.17
  11  -1  -2    0.92    0.25
 -11   1   2    1.13    0.25
 -11   1   2    1.09    0.15
 -11   1   2    1.01    0.13
  10  -1  -2    1.32    0.32
  10  -1  -2    1.23    0.15
  10  -1  -2    1.73    0.26
  10  -1  -2    1.20    0.17
 -10   1   2    1.47    0.16
 -10   1   2    1.20    0.15
 -10   1   2    1.56    0.23
   9  -1  -2    0.05    0.09
   9  -1  -2   -0.08    0.09
   9  -1  -2    0.07    0.20
   9  -1  -2   -0.13    0.18
   9  -1  -2    0.03    0.16
  -9   1   2   -0.04    0.09
  -9   1   2    0.03    0.07
  -9   1   2    0.15    0.15
   8  -1  -2    2.38    0.15
   8  -1  -2    2.59    0.32
   8  -1  -2    1.75    0.22
   8  -1  -2    2.15    0.17
  -8   1   2    2.33    0.14
  -8   1   2    2.37    0.23
   7  -1  -2    1.07    0.18
   7  -1  -2    1.08    0.11
   7  -1  -2    1.07    0.15
   7  -1  -2    1.12    0.11
   7  -1  -2    1.10    0.20
   7  -1  -2    1.41    0.21
  -7   1   2    0.96    0.15
  -7   1   2    1.05    0.20
  -7   1   2    0.99    0.11
  -7   1   2    1.03    0.11
   6  -1  -2   15.38    0.43
   6  -1  -2   14.66    0.58
   6  -1  -2   15.36    0.52
   6  -1  -2   14.93    0.43
   6  -1  -2   15.03    0.54
  -6   1   2   15.96    0.54
  -6   1   2   15.65    0.45
  -6   1   2   14.92    0.45
   5  -1  -2   31.59    0.82
   5  -1  -2   31.25    0.92
   5  -1  -2   30.60    0.96
   5  -1  -2   31.54    0.81
  -5   1   2   31.89    0.82
  -5   1   2   31.54    0.91
  -5   1   2   30.88    0.84
   4  -1  -2    9.68    0.28
   4  -1  -2    9.49    0.37
   4  -1  -2    9.46    0.29
   4  -1  -2    9.48    0.34
   4  -1  -2    9.42    0.37
  -4   1   2    9.03    0.36
  -4   1   2    9.36    0.29
  -4   1   2    9.95    0.31
   3  -1  -2  218.70    5.42
   3  -1  -2  216.03    5.38
   3  -1  -2  208.35    5.38
   3  -1  -2  222.21    5.30
   3  -1  -2  223.96    5.43
  -3   1   2  226.43    5.52
  -3   1   2  217.28    5.48
  -3   1   2  218.40    5.49
  -3   1   2  219.97    5.40
  -3   1   2  226.76    5.52
   2  -1  -2    4.22    0.19
   2  -1  -2    5.22    0.22
   2  -1  -2    4.99    0.19
   2  -1  -2    5.39    0.23
   2  -1  -2    5.14    0.22
   2  -1  -2    5.22    0.18
  -2   1   2    4.92    0.20
  -2   1   2    5.08    0.18
  -2   1   2    5.26    0.22
  -2   1   2    5.36    0.21
   1  -1  -2    7.12    0.26
   1  -1  -2    7.45    0.25
   1  -1  -2    7.90    0.25
   1  -1  -2    7.72    0.28
  -1   1   2    7.79    0.27
  -1   1   2    7.84    0.25
  -1   1   2    7.51    0.27
   0  -1  -2  438.82   10.88
   0  -1  -2  440.58   10.89
   0  -1  -2  450.67   10.92
   0   1   2  441.51   10.75
   0   1   2  444.86   10.90
   0   1   2  444.39   10.91
   0   1   2  439.46   11.00
  -1  -1  -2   10.38    0.36
  -1  -1  -2   10.99    0.32
  -1  -1  -2   10.09    0.35
   1   1   2   10.66    0.37
   1   1   2   10.71    0.37
   1   1   2   11.57    0.37
   1   1   2   10.96    0.33
   1   1   2   11.10    0.33
  -2  -1  -2   48.94    1.27
  -2  -1  -2   49.32    1.27
  -2  -1  -2   51.01    1.34
  -2  -1  -2   48.32    1.33
  -2  -1  -2   50.63    1.32
   2   1   2   48.35    1.32
   2   1   2   48.84    1.25
   2   1   2   50.25    1.27
   2   1   2   47.39    1.30
   2   1   2   50.11    1.32
  -3  -1  -2   95.79    2.52
  -3  -1  -2  102.14    2.53
  -3  -1  -2  103.77    2.60
  -3  -1  -2  100.83    2.59
   3   1   2   97.09    2.47
   3   1   2   97.03    2.48
   3   1   2   99.40    2.55
   3   1   2  101.46    2.53
  -4  -1  -2    0.39    0.12
  -4  -1  -2    0.32    0.07
  -4  -1  -2    0.41    0.11
  -4  -1  -2    0.58    0.09
  -4  -1  -2    0.29    0.12
   4   1   2    0.37    0.12
   4   1   2    0.48    0.08
   4   1   2    0.45    0.08
  -5  -1  -2   60.93    1.62
  -5  -1  -2   59.85    1.67
  -5  -1  -2   62.80    1.63
  -5  -1  -2   60.06    1.60
  -5  -1  -2   60.08    1.66
   5   1   2   58.42    1.63
   5   1   2   60.42    1.66
   5   1   2   59.45    1.63
   5   1   2   59.85    1.59
   5   1   2   61.47    1.59
  -6  -1  -2   25.46    0.78
  -6  -1  -2   25.03    0.79
  -6  -1  -2   26.47    0.79
  -6  -1  -2   24.36    0.76
   6   1   2   24.40    0.79
   6   1   2   24.28    0.77
   6   1   2   24.11    0.74
   6   1   2   24.20    0.82
  -7  -1  -2   26.06    0.81
  -7  -1  -2   24.71    0.80
  -7  -1  -2   25.27    0.79
   7   1   2   24.82    0.87
   7   1   2   25.07    0.79
   7   1   2   25.51    0.79
   7   1   2   25.67    0.82
  -8  -1  -2   31.56    0.95
  -8  -1  -2   30.49    0.95
  -8  -1  -2   29.20    0.94
  -8  -1  -2   30.95    0.98
   8   1   2   30.76    0.97
   8   1   2   30.73    0.96
   8   1   2   30.22    0.95
   8   1   2   31.13    1.04
  -9  -1  -2    0.60    0.18
  -9  -1  -2   -0.31    0.19
  -9  -1  -2    0.26    0.18
  -9  -1  -2    0.32    0.16
   9   1   2    0.48    0.17
   9   1   2    0.35    0.19
   9   1   2    0.65    0.19
   9   1   2    0.50    0.22
   9   1   2    0.49    0.23
 -10  -1  -2   21.80    0.78
 -10  -1  -2   20.72    0.75
 -10  -1  -2   21.87    0.83
 -10  -1  -2   20.56    0.74
  10   1   2   17.62    0.72
  10   1   2   22.68    0.78
  10   1   2   19.58    0.82
  10   1   2   20.90    0.78
 -11  -1  -2    2.77    0.32
 -11  -1  -2    2.53    0.37
 -11  -1  -2    3.07    0.35
 -11  -1  -2    2.47    0.33
  11   1   2    2.12    0.38
  11   1   2    2.43    0.32
  11   1   2    2.64    0.33
  11   1   2    2.68    0.35
  11   1   2    2.85    0.33
 -12  -1  -2    1.53    0.27
 -12  -1  -2    1.27    0.30
 -12  -1  -2    1.44    0.25
 -12  -1  -2    1.45    0.37
  12   1   2    1.27    0.30
  12   1   2    0.44    0.31
  12   1   2    1.32    0.34
  12   1   2    1.55    0.31
 -13  -1  -2    0.18    0.21
 -13  -1  -2   -0.19    0.25
 -13  -1  -2   -0.20    0.43
 -13  -1  -2   -0.15    0.26
  13   1   2   -0.05    0.37
  13   1   2   -0.09    0.28
  13   1   2    0.41    0.32
  13   1   2    0.10    0.38
 -14  -1  -2   -0.13    0.49
 -14  -1  -2   -0.02    0.33
 -14  -1  -2   -0.22    0.23
 -14  -1  -2    0.00    0.29
  14   1   2   -0.26    0.40
  14   1   2    0.40    0.34
  14   1   2    0.17    0.32
  14   1   2   -0.07    0.39
 -15  -1  -2   -0.20    0.38
  15   1   2    0.10    0.37
  15   1   2    0.63    0.39
  15   1   2    1.19    0.44
 -16  -1  -2    1.42    0.47
 -16  -1  -2    2.44    0.38
  16   1   2    1.88    0.48
  16   1   2    1.41    0.45
  16   1   2    1.91    0.60
 -17  -1  -2    0.05    0.44
 -17  -1  -2   -0.06    0.34
  17   1   2   -0.34    0.50
  17   1   2    0.97    0.47
  17   1   2    0.15    0.62
 -18  -1  -2    0.67    0.39
 -18  -1  -2    0.73    0.61
  18   1   2    1.48    0.66
  18   1   2    1.31    0.73
  19  -2  -2   -0.37    0.78
  19  -2  -2    1.46    0.80
 -19   2   2    0.91    0.65
  18  -2  -2   -0.17    0.73
  18  -2  -2    0.21    0.64
 -18   2   2    0.39    0.57
 -18   2   2    0.83    0.41
  17  -2  -2    1.66    0.65
  17  -2  -2    1.91    0.60
 -17   2   2    1.40    0.36
 -17   2   2    0.69    0.47
  16  -2  -2    1.63    0.51
  16  -2  -2    0.22    0.57
 -16   2   2    0.52    0.30
 -16   2   2    0.87    0.48
  15  -2  -2    4.91    0.65
  15  -2  -2    4.88    0.55
  15  -2  -2    5.93    0.73
 -15   2   2    4.86    0.47
 -15   2   2    4.28    0.55
  14  -2  -2    0.76    0.29
 -14   2   2    1.52    0.26
 -14   2   2    1.45    0.40
  13  -2  -2    8.50    0.32
  13  -2  -2    8.43    0.60
  13  -2  -2    9.94    0.78
  13  -2  -2    8.27    0.46
 -13   2   2    9.95    0.50
 -13   2   2   10.19    0.66
 -13   2   2   10.06    0.35
  12  -2  -2    0.30    0.25
  12  -2  -2    0.06    0.18
  12  -2  -2    0.34    0.35
  12  -2  -2   -0.29    0.11
 -12   2   2    0.29    0.18
 -12   2   2    0.17    0.26
 -12   2   2    0.11    0.12
  11  -2  -2    0.91    0.12
  11  -2  -2    0.33    0.23
  11  -2  -2    0.86    0.33
  11  -2  -2    0.77    0.17
 -11   2   2    0.86    0.14
 -11   2   2    1.08    0.19
 -11   2   2    0.81    0.26
  10  -2  -2    2.54    0.31
  10  -2  -2    1.87    0.38
  10  -2  -2    2.84    0.23
  10  -2  -2    2.25    0.17
 -10   2   2    3.56    0.36
 -10   2   2    2.68    0.25
 -10   2   2    2.39    0.20
   9  -2  -2   -0.15    0.21
   9  -2  -2   -0.15    0.10
   9  -2  -2    0.14    0.26
   9  -2  -2    0.13    0.08
  -9   2   2    0.16    0.18
  -9   2   2    0.06    0.12
  -9   2   2    0.04    0.11
   8  -2  -2    6.74    0.48
   8  -2  -2    5.95    0.36
   8  -2  -2    6.03    0.23
   8  -2  -2    5.99    0.26
   8  -2  -2    5.37    0.40
  -8   2   2    6.23    0.31
  -8   2   2    6.06    0.41
  -8   2   2    6.23    0.27
  -8   2   2    6.32    0.44
   7  -2  -2    8.94    0.46
   7  -2  -2    8.76    0.44
   7  -2  -2    9.69    0.52
   7  -2  -2    9.41    0.30
   7  -2  -2    8.96    0.32
  -7   2   2    8.96    0.34
  -7   2   2    9.44    0.45
  -7   2   2    9.31    0.48
  -7   2   2    9.38    0.37
   6  -2  -2    4.68    0.31
   6  -2  -2    4.29    0.22
   6  -2  -2    4.64    0.28
   6  -2  -2    4.33    0.20
   6  -2  -2    4.23    0.36
   6  -2  -2    4.22    0.22
  -6   2   2    4.59    0.31
  -6   2   2    4.50    0.33
   5  -2  -2   22.47    0.65
   5  -2  -2   21.82    0.66
   5  -2  -2   21.89    0.80
   5  -2  -2   22.87    0.73
   5  -2  -2   22.00    0.77
   5  -2  -2   22.80    0.65
   5  -2  -2   21.76    0.74
  -5   2   2   21.65    0.72
  -5   2   2   20.94    0.72
   4  -2  -2   12.13    0.42
   4  -2  -2   12.55    0.41
   4  -2  -2   12.30    0.46
   4  -2  -2   11.90    0.41
   4  -2  -2   11.90    0.51
   4  -2  -2   12.03    0.47
   4  -2  -2   12.11    0.49
  -4   2   2   12.55    0.48
  -4   2   2   12.77    0.44
   3  -2  -2    0.29    0.12
   3  -2  -2    0.28    0.12
   3  -2  -2    0.28    0.09
   3  -2  -2    0.38    0.10
   3  -2  -2    0.42    0.10
   3  -2  -2    0.37    0.14
   3  -2  -2    0.37    0.11
  -3   2   2    0.37    0.13
  -3   2   2    0.36    0.11
  -3   2   2    0.32    0.09
   2  -2  -2    0.09    0.10
   2  -2  -2    0.20    0.10
   2  -2  -2    0.23    0.11
   2  -2  -2    0.21    0.09
   2  -2  -2    0.22    0.10
   2  -2  -2    0.23    0.10
  -2   2   2    0.28    0.09
  -2   2   2    0.27    0.10
   1  -2  -2    0.11    0.10
   1  -2  -2    0.12    0.09
   1  -2  -2    0.11    0.09
   1  -2  -2    0.13    0.09
   1  -2  -2    0.21    0.09
   1  -2  -2    0.03    0.08
  -1   2   2    0.01    0.07
  -1   2   2    0.25    0.10
   0  -2  -2   25.41    0.73
   0  -2  -2   25.65    0.74
   0  -2  -2   23.63    0.77
   0  -2  -2   25.01    0.75
   0  -2  -2   25.64    0.76
   0   2   2   24.61    0.75
   0   2   2   25.45    0.73
   0   2   2   25.95    0.78
  -1  -2  -2    1.31    0.16
  -1  -2  -2    1.87    0.20
  -1  -2  -2    1.57    0.16
  -1  -2  -2    1.69    0.14
  -1  -2  -2    1.46    0.18
   1   2   2    1.66    0.16
   1   2   2    1.41    0.13
   1   2   2    1.25    0.18
  -2  -2  -2    0.30    0.09
  -2  -2  -2    0.57    0.14
  -2  -2  -2    0.40    0.07
  -2  -2  -2    0.41    0.13
   2   2   2    0.45    0.14
   2   2   2    0.37    0.10
   2   2   2    0.34    0.11
   2   2   2    0.34    0.07
  -3  -2  -2    4.06    0.18
  -3  -2  -2    4.07    0.27
  -3  -2  -2    3.97    0.28
   3   2   2    3.85    0.28
   3   2   2    4.07    0.29
   3   2   2    4.28    0.25
   3   2   2    3.95    0.28
   3   2   2    3.96    0.18
  -4  -2  -2   21.18    0.68
  -4  -2  -2   22.19    0.75
  -4  -2  -2   23.06    0.75
  -4  -2  -2   22.02    0.62
  -4  -2  -2   22.25    0.75
   4   2   2   22.20    0.75
   4   2   2   22.35    0.70
   4   2   2   21.83    0.61
   4   2   2   22.64    0.78
   4   2   2   21.14    0.75
  -5  -2  -2    4.58    0.31
  -5  -2  -2    4.94    0.27
  -5  -2  -2    4.44    0.31
  -5  -2  -2    4.98    0.23
   5   2   2    4.59    0.32
   5   2   2    5.48    0.31
   5   2   2    4.49    0.31
   5   2   2    4.74    0.36
   5   2   2    4.96    0.21
  -6  -2  -2    0.92    0.20
  -6  -2  -2    0.88    0.21
  -6  -2  -2    0.93    0.13
  -6  -2  -2    1.08    0.22
  -6  -2  -2    1.05    0.17
   6   2   2    1.01    0.18
   6   2   2    0.86    0.20
   6   2   2    0.97    0.11
   6   2   2    1.03    0.22
  -7  -2  -2    1.89    0.27
  -7  -2  -2    1.48    0.23
  -7  -2  -2    1.96    0.22
  -7  -2  -2    1.69    0.19
   7   2   2    1.73    0.27
   7   2   2    1.69    0.23
   7   2   2    2.07    0.27
   7   2   2    1.69    0.17
  -8  -2  -2    9.65    0.51
  -8  -2  -2   10.98    0.57
  -8  -2  -2   10.90    0.51
  -8  -2  -2   10.77    0.45
  -8  -2  -2   11.56    0.49
   8   2   2   10.93    0.57
   8   2   2   10.79    0.52
   8   2   2    9.45    0.52
  -9  -2  -2    6.05    0.39
  -9  -2  -2    5.87    0.46
  -9  -2  -2    5.85    0.41
   9   2   2    6.09    0.48
   9   2   2    5.65    0.33
   9   2   2    5.11    0.43
   9   2   2    5.55    0.46
 -10  -2  -2    2.93    0.34
 -10  -2  -2    3.60    0.38
 -10  -2  -2    3.02    0.36
 -10  -2  -2    3.09    0.34
  10   2   2    3.58    0.44
  10   2   2    3.68    0.45
  10   2   2    3.47    0.43
  10   2   2    3.53    0.32
 -11  -2  -2    7.19    0.50
 -11  -2  -2    6.49    0.54
 -11  -2  -2    6.21    0.48
 -11  -2  -2    7.06    0.51
  11   2   2    7.51    0.61
  11   2   2    7.42    0.55
  11   2   2    6.49    0.43
  11   2   2    7.24    0.57
 -12  -2  -2    6.17    0.57
 -12  -2  -2    6.85    0.55
 -12  -2  -2    6.21    0.50
 -12  -2  -2    6.52    0.51
  12   2   2    6.69    0.49
  12   2   2    6.76    0.59
  12   2   2    7.01    0.66
  12   2   2    6.71    0.52
 -13  -2  -2    0.34    0.37
 -13  -2  -2    0.78    0.29
 -13  -2  -2    1.19    0.33
  13   2   2    1.66    0.41
  13   2   2    0.87    0.33
  13   2   2    1.31    0.42
  13   2   2    1.20    0.30
 -14  -2  -2    0.11    0.34
 -14  -2  -2   -0.04    0.31
  14   2   2    0.16    0.31
  14   2   2    0.18    0.40
  14   2   2   -0.79    0.39
 -15  -2  -2   -0.07    0.33
 -15  -2  -2    0.47    0.40
  15   2   2    0.44    0.48
  15   2   2    0.03    0.42
  15   2   2   -0.34    0.34
 -16  -2  -2   -0.56    0.40
 -16  -2  -2    0.66    0.38
  16   2   2   -0.38    0.40
  16   2   2   -0.69    0.46
  16   2   2    0.56    0.56
 -17  -2  -2    0.91    0.51
 -17  -2  -2    1.48    0.46
  17   2   2    0.36    0.59
  17   2   2    1.46    0.62
 -18  -2  -2    0.85    0.49
 -18  -2  -2    0.03    0.60
  18   2   2    1.23    0.77
  18  -3  -2    0.30    0.71
  18  -3  -2    0.73    0.85
 -18   3   2    0.58    0.68
  17  -3  -2    0.78    0.69
  17  -3  -2    0.12    0.74
 -17   3   2    0.06    0.42
 -17   3   2   -0.57    0.56
  16  -3  -2    0.44    0.67
  16  -3  -2    2.19    0.57
 -16   3   2    0.42    0.49
 -16   3   2    1.35    0.40
  15  -3  -2   -0.10    0.43
  15  -3  -2    1.08    0.61
 -15   3   2    0.44    0.34
 -15   3   2   -0.09    0.44
  14  -3  -2    0.44    0.51
  14  -3  -2   -0.28    0.40
  14  -3  -2   -0.10    0.27
 -14   3   2    0.00    0.30
 -14   3   2   -0.04    0.39
  13  -3  -2    3.31    0.33
  13  -3  -2    5.35    0.66
  13  -3  -2    3.20    0.54
 -13   3   2    4.35    0.45
 -13   3   2    4.36    0.53
  12  -3  -2   -0.26    0.29
  12  -3  -2    0.19    0.40
  12  -3  -2   -0.04    0.19
 -12   3   2   -0.09    0.23
 -12   3   2    0.01    0.29
  11  -3  -2   11.71    0.68
  11  -3  -2   12.01    0.81
  11  -3  -2   10.94    0.36
  11  -3  -2   11.25    0.40
 -11   3   2   11.34    0.71
 -11   3   2   11.71    0.57
  10  -3  -2    0.68    0.30
  10  -3  -2    0.14    0.34
  10  -3  -2    0.93    0.12
  10  -3  -2    1.08    0.18
  10  -3  -2    0.66    0.16
 -10   3   2    0.49    0.28
 -10   3   2    0.59    0.21
 -10   3   2    0.39    0.34
   9  -3  -2   -0.32    0.22
   9  -3  -2    0.15    0.31
   9  -3  -2   -0.03    0.10
   9  -3  -2    0.04    0.14
   9  -3  -2   -0.07    0.14
  -9   3   2    0.03    0.23
  -9   3   2   -0.22    0.27
  -9   3   2   -0.11    0.17
   8  -3  -2    0.39    0.22
   8  -3  -2    0.31    0.15
   8  -3  -2    0.24    0.29
   8  -3  -2    0.38    0.14
   8  -3  -2    0.52    0.12
  -8   3   2    0.57    0.18
  -8   3   2    0.61    0.25
  -8   3   2    0.55    0.22
   7  -3  -2    0.81    0.17
   7  -3  -2    0.63    0.16
   7  -3  -2    0.39    0.27
   7  -3  -2    0.09    0.23
   7  -3  -2    0.66    0.21
  -7   3   2    0.58    0.24
  -7   3   2    0.49    0.18
  -7   3   2    0.45    0.21
   6  -3  -2    1.85    0.31
   6  -3  -2    2.03    0.23
   6  -3  -2    1.69    0.27
   6  -3  -2    1.87    0.26
   6  -3  -2    1.79    0.21
  -6   3   2    2.10    0.30
  -6   3   2    1.59    0.25
  -6   3   2    1.76    0.23
   5  -3  -2   42.17    1.22
   5  -3  -2   41.81    1.27
   5  -3  -2   41.98    1.36
   5  -3  -2   43.53    1.29
   5  -3  -2   41.88    1.22
   5  -3  -2   44.32    1.21
  -5   3   2   42.11    1.23
  -5   3   2   42.05    1.30
   4  -3  -2    0.32    0.17
   4  -3  -2    0.00    0.15
   4  -3  -2    0.21    0.15
   4  -3  -2    0.53    0.21
   4  -3  -2    0.32    0.16
   4  -3  -2    0.00    0.16
   4  -3  -2    0.13    0.19
   4  -3  -2    0.16    0.14
  -4   3   2    0.27    0.16
  -4   3   2    0.24    0.15
   3  -3  -2   33.49    1.09
   3  -3  -2   34.15    1.02
   3  -3  -2   34.19    1.05
   3  -3  -2   34.66    1.05
   3  -3  -2   33.18    1.04
   3  -3  -2   34.64    1.06
   3  -3  -2   34.69    1.04
   3  -3  -2   33.22    1.06
  -3   3   2   35.14    1.08
  -3   3   2   33.54    1.03
  -3   3   2   33.72    1.03
   2  -3  -2    9.91    0.50
   2  -3  -2   10.62    0.48
   2  -3  -2   10.82    0.47
   2  -3  -2   10.56    0.51
   2  -3  -2   10.58    0.45
   2  -3  -2    9.89    0.48
   2  -3  -2   10.51    0.47
   2  -3  -2   10.55    0.48
   2  -3  -2   10.47    0.46
  -2   3   2   10.60    0.46
  -2   3   2   10.33    0.46
  -2   3   2   10.26    0.45
   1  -3  -2    1.51    0.19
   1  -3  -2    1.72    0.23
   1  -3  -2    1.19    0.21
   1  -3  -2    1.27    0.24
   1  -3  -2    1.07    0.20
   1  -3  -2    1.57    0.21
   1  -3  -2    1.76    0.21
   1  -3  -2    1.54    0.21
  -1   3   2    1.30    0.20
  -1   3   2    1.12    0.20
   0  -3  -2    4.53    0.35
   0  -3  -2    4.51    0.33
   0  -3  -2    4.09    0.32
   0  -3  -2    4.36    0.28
   0  -3  -2    4.75    0.31
   0   3   2    4.19    0.31
   0   3   2    4.09    0.30
   0   3   2    4.49    0.31
  -1  -3  -2   18.47    0.67
  -1  -3  -2   18.50    0.68
  -1  -3  -2   18.61    0.60
  -1  -3  -2   18.58    0.70
  -1  -3  -2   19.00    0.72
   1   3   2   16.97    0.63
   1   3   2   16.92    0.66
   1   3   2   17.58    0.56
   1   3   2   16.82    0.64
  -2  -3  -2    7.49    0.31
  -2  -3  -2    7.78    0.41
  -2  -3  -2    7.71    0.46
  -2  -3  -2    6.90    0.43
  -2  -3  -2    7.78    0.45
  -2  -3  -2    8.00    0.40
   2   3   2    7.73    0.31
   2   3   2    8.34    0.45
   2   3   2    7.05    0.41
   2   3   2    7.55    0.39
  -3  -3  -2    8.15    0.31
  -3  -3  -2    9.05    0.43
  -3  -3  -2    8.24    0.46
  -3  -3  -2    9.07    0.45
   3   3   2    8.60    0.31
   3   3   2    8.52    0.43
   3   3   2    8.89    0.47
  -4  -3  -2    2.21    0.15
  -4  -3  -2    2.23    0.27
  -4  -3  -2    2.20    0.30
  -4  -3  -2    2.68    0.31
   4   3   2    2.05    0.15
   4   3   2    2.46    0.31
   4   3   2    2.01    0.27
   4   3   2    1.92    0.24
  -5  -3  -2    7.83    0.48
  -5  -3  -2    8.20    0.28
  -5  -3  -2    8.12    0.48
  -5  -3  -2    8.23    0.42
   5   3   2    7.99    0.45
   5   3   2    7.66    0.27
   5   3   2    7.98    0.46
   5   3   2    7.96    0.51
  -6  -3  -2    0.74    0.11
  -6  -3  -2    0.52    0.18
  -6  -3  -2    0.89    0.24
  -6  -3  -2    0.41    0.23
   6   3   2    0.66    0.24
   6   3   2    0.58    0.30
   6   3   2    0.59    0.26
   6   3   2    0.57    0.08
   6   3   2    0.50    0.22
  -7  -3  -2    2.36    0.18
  -7  -3  -2    2.33    0.33
  -7  -3  -2    1.97    0.25
   7   3   2    3.18    0.39
   7   3   2    2.99    0.32
   7   3   2    2.55    0.37
   7   3   2    2.55    0.15
  -8  -3  -2   -0.34    0.27
  -8  -3  -2    0.18    0.19
  -8  -3  -2   -0.05    0.24
  -8  -3  -2    0.37    0.12
   8   3   2    0.19    0.27
   8   3   2    0.08    0.09
   8   3   2    0.29    0.25
   8   3   2    0.26    0.25
  -9  -3  -2    5.79    0.43
  -9  -3  -2    5.84    0.52
  -9  -3  -2    5.66    0.31
   9   3   2    5.35    0.26
   9   3   2    5.30    0.49
   9   3   2    5.16    0.53
   9   3   2    5.90    0.56
 -10  -3  -2   -0.21    0.22
 -10  -3  -2    0.24    0.27
 -10  -3  -2   -0.11    0.18
  10   3   2    0.13    0.28
  10   3   2   -0.21    0.31
  10   3   2    0.54    0.29
  10   3   2    0.10    0.12
  10   3   2    0.04    0.15
 -11  -3  -2    0.26    0.32
 -11  -3  -2    0.29    0.28
  11   3   2    0.77    0.38
  11   3   2    0.18    0.19
  11   3   2    0.39    0.33
 -12  -3  -2   -0.07    0.28
  12   3   2    0.59    0.42
  12   3   2   -0.04    0.18
  12   3   2   -0.56    0.32
 -13  -3  -2   -0.11    0.36
 -13  -3  -2    0.34    0.33
  13   3   2    0.16    0.21
  13   3   2   -1.13    0.38
  13   3   2    0.21    0.37
 -14  -3  -2    2.51    0.42
 -14  -3  -2    1.99    0.40
  14   3   2    1.84    0.29
  14   3   2    1.06    0.52
 -15  -3  -2    0.25    0.43
 -15  -3  -2   -0.38    0.40
  15   3   2   -0.90    0.49
  15   3   2    0.25    0.53
 -16  -3  -2    0.35    0.50
 -16  -3  -2    0.25    0.50
  16   3   2   -0.16    0.60
  16   3   2   -0.82    0.58
 -17  -3  -2    0.42    0.57
 -17  -3  -2   -0.14    0.48
  17   3   2   -0.39    0.67
  17   3   2   -0.95    0.68
  17  -4  -2    1.29    0.68
  17  -4  -2    1.78    0.95
 -17   4   2    1.50    0.75
  16  -4  -2   -1.25    0.75
  16  -4  -2   -0.58    0.65
 -16   4   2    0.60    0.66
 -16   4   2    0.36    0.49
  15  -4  -2   -0.31    0.49
  15  -4  -2    0.82    0.65
 -15   4   2   -0.01    0.41
 -15   4   2    1.01    0.56
  14  -4  -2    0.92    0.61
  14  -4  -2    0.40    0.48
 -14   4   2   -0.18    0.51
 -14   4   2   -0.38    0.37
  13  -4  -2    0.41    0.43
  13  -4  -2   -0.29    0.31
  13  -4  -2    0.24    0.59
 -13   4   2   -0.51    0.42
 -13   4   2   -0.06    0.34
  12  -4  -2    3.30    0.50
  12  -4  -2    1.54    0.53
  12  -4  -2    2.96    0.34
 -12   4   2    3.01    0.41
 -12   4   2    4.01    0.57
  11  -4  -2    0.20    0.12
  11  -4  -2    0.28    0.38
  11  -4  -2   -0.08    0.46
  11  -4  -2    0.08    0.18
 -11   4   2   -0.20    0.27
 -11   4   2   -0.23    0.35
  10  -4  -2    0.76    0.49
  10  -4  -2    0.59    0.34
  10  -4  -2    0.55    0.27
 -10   4   2    0.51    0.29
 -10   4   2    0.76    0.37
   9  -4  -2   10.95    0.52
   9  -4  -2    9.88    0.66
   9  -4  -2   10.27    0.53
   9  -4  -2   11.94    0.82
   9  -4  -2   10.38    0.44
  -9   4   2   10.37    0.76
  -9   4   2    9.94    0.60
  -9   4   2   10.64    0.69
   8  -4  -2    1.09    0.20
   8  -4  -2    1.38    0.31
   8  -4  -2    0.97    0.38
   8  -4  -2    1.65    0.27
   8  -4  -2    0.53    0.35
   8  -4  -2    0.94    0.25
  -8   4   2    1.51    0.35
  -8   4   2    1.08    0.27
   7  -4  -2   -0.06    0.22
   7  -4  -2    0.30    0.19
   7  -4  -2   -0.22    0.28
   7  -4  -2    0.17    0.25
   7  -4  -2    0.06    0.34
   7  -4  -2    0.23    0.22
  -7   4   2   -0.15    0.26
  -7   4   2   -0.16    0.20
   6  -4  -2    2.87    0.33
   6  -4  -2    2.80    0.34
   6  -4  -2    2.49    0.36
   6  -4  -2    3.21    0.47
   6  -4  -2    2.56    0.30
   6  -4  -2    2.09    0.32
  -6   4   2    2.63    0.34
  -6   4   2    2.83    0.37
   5  -4  -2    1.13    0.27
   5  -4  -2    1.08    0.30
   5  -4  -2    1.08    0.29
   5  -4  -2    1.04    0.23
   5  -4  -2    0.91    0.32
   5  -4  -2    0.98    0.24
  -5   4   2    0.78    0.27
  -5   4   2    1.16    0.25
   4  -4  -2    5.72    0.49
   4  -4  -2    4.29    0.40
   4  -4  -2    4.90    0.41
   4  -4  -2    5.58    0.42
   4  -4  -2    4.33    0.39
   4  -4  -2    5.15    0.47
   4  -4  -2    5.41    0.42
   4  -4  -2    5.19    0.43
  -4   4   2    5.21    0.46
  -4   4   2    5.18    0.41
   3  -4  -2   13.20    0.60
   3  -4  -2   13.50    0.62
   3  -4  -2   14.40    0.63
   3  -4  -2   13.33    0.63
   3  -4  -2   13.43    0.65
   3  -4  -2   12.88    0.63
   3  -4  -2   13.04    0.66
   3  -4  -2   13.66    0.64
   3  -4  -2   12.85    0.67
   3  -4  -2   12.98    0.64
  -3   4   2   14.16    0.63
  -3   4   2   13.40    0.61
   2  -4  -2    1.40    0.26
   2  -4  -2    1.09    0.27
   2  -4  -2    1.79    0.28
   2  -4  -2    1.34    0.30
   2  -4  -2    1.36    0.28
   2  -4  -2    1.22    0.25
   2  -4  -2    1.47    0.30
   2  -4  -2    1.65    0.30
   2  -4  -2    1.16    0.28
  -2   4   2    1.69    0.27
  -2   4   2    1.48    0.26
   1  -4  -2    6.56    0.49
   1  -4  -2    6.28    0.50
   1  -4  -2    6.72    0.44
   1  -4  -2    6.62    0.46
   1  -4  -2    6.95    0.48
   1  -4  -2    6.61    0.46
   1  -4  -2    5.89    0.49
   1  -4  -2    6.45    0.43
  -1   4   2    6.45    0.43
  -1   4   2    6.33    0.43
   0  -4  -2    0.17    0.26
   0  -4  -2   -0.05    0.22
   0  -4  -2    0.16    0.20
   0  -4  -2   -0.03    0.21
   0  -4  -2    0.07    0.18
   0  -4  -2    0.00    0.17
   0  -4  -2    0.05    0.23
   0   4   2    0.06    0.22
   0   4   2    0.04    0.19
  -1  -4  -2    4.46    0.31
  -1  -4  -2    3.94    0.40
  -1  -4  -2    4.59    0.40
  -1  -4  -2    4.24    0.35
  -1  -4  -2    4.25    0.42
  -1  -4  -2    3.74    0.40
   1   4   2    4.18    0.39
   1   4   2    3.98    0.39
  -2  -4  -2    5.58    0.32
  -2  -4  -2    6.19    0.52
  -2  -4  -2    5.62    0.44
  -2  -4  -2    5.30    0.43
   2   4   2    5.19    0.44
   2   4   2    4.75    0.41
   2   4   2    3.84    0.43
  -3  -4  -2    2.88    0.35
  -3  -4  -2    2.15    0.35
  -3  -4  -2    2.66    0.40
  -3  -4  -2    2.83    0.23
  -3  -4  -2    2.46    0.25
  -3  -4  -2    2.28    0.31
   3   4   2    3.13    0.36
   3   4   2    2.38    0.32
   3   4   2    2.70    0.38
  -4  -4  -2   -0.01    0.12
  -4  -4  -2    0.07    0.11
  -4  -4  -2    0.19    0.23
  -4  -4  -2   -0.14    0.25
  -4  -4  -2    0.01    0.23
   4   4   2    0.19    0.27
   4   4   2    0.85    0.27
   4   4   2    0.00    0.22
  -5  -4  -2    4.86    0.20
  -5  -4  -2    3.99    0.21
  -5  -4  -2    4.26    0.46
  -5  -4  -2    4.97    0.49
  -5  -4  -2    4.83    0.43
   5   4   2    4.57    0.47
   5   4   2    5.66    0.49
   5   4   2    4.43    0.47
  -6  -4  -2    1.12    0.26
  -6  -4  -2    1.11    0.33
  -6  -4  -2    1.13    0.33
   6   4   2    1.18    0.34
   6   4   2    1.59    0.33
   6   4   2    1.59    0.35
  -7  -4  -2    8.29    0.62
  -7  -4  -2    8.53    0.52
   7   4   2    7.75    0.62
   7   4   2    9.29    0.64
   7   4   2    8.25    0.62
  -8  -4  -2    0.16    0.36
  -8  -4  -2    0.69    0.27
   8   4   2    0.68    0.36
   8   4   2    0.27    0.32
   8   4   2    0.26    0.32
  -9  -4  -2    3.95    0.51
  -9  -4  -2    4.75    0.48
   9   4   2    3.50    0.51
   9   4   2    4.46    0.58
   9   4   2    3.26    0.47
 -10  -4  -2    1.15    0.43
 -10  -4  -2    0.59    0.31
  10   4   2    0.53    0.41
 -11  -4  -2    2.41    0.49
 -11  -4  -2    2.05    0.37
  11   4   2    0.81    0.44
  11   4   2    2.01    0.49
 -12  -4  -2   -0.82    0.42
 -12  -4  -2   -0.27    0.31
  12   4   2   -0.25    0.52
  12   4   2    0.11    0.44
 -13  -4  -2    0.66    0.52
 -13  -4  -2    0.82    0.43
  13   4   2    1.00    0.60
  13   4   2    2.06    0.56
 -14  -4  -2    0.42    0.45
 -14  -4  -2    0.54    0.50
  14   4   2   -0.30    0.60
  14   4   2    1.24    0.59
 -15  -4  -2    0.51    0.52
 -15  -4  -2   -0.10    0.49
  15   4   2    1.79    0.69
  15   4   2    0.88    0.66
 -16  -4  -2    0.26    0.62
 -16  -4  -2    0.34    0.55
  16   4   2    2.05    0.70
  16   4   2   -0.22    0.73
  15  -5  -2    0.52    0.67
  15  -5  -2   -0.48    0.85
 -15   5   2    0.64    0.74
  14  -5  -2    0.53    0.81
  14  -5  -2    0.70    0.59
 -14   5   2   -0.01    0.49
 -14   5   2    0.23    0.57
  13  -5  -2   -0.18    0.53
  13  -5  -2   -0.02    0.72
 -13   5   2    0.12    0.47
 -13   5   2    0.33    0.59
  12  -5  -2    0.36    0.66
  12  -5  -2   -0.04    0.46
 -12   5   2   -0.27    0.39
 -12   5   2   -0.16    0.49
  11  -5  -2    1.26    0.24
  11  -5  -2    1.09    0.50
  11  -5  -2    1.23    0.60
 -11   5   2    1.51    0.50
 -11   5   2    1.27    0.41
  10  -5  -2    0.07    0.41
  10  -5  -2   -1.23    0.48
  10  -5  -2    0.20    0.24
 -10   5   2   -0.57    0.40
 -10   5   2   -0.37    0.36
   9  -5  -2    2.86    0.36
   9  -5  -2    1.71    0.42
   9  -5  -2    2.32    0.63
   9  -5  -2    3.43    0.37
  -9   5   2    2.67    0.41
  -9   5   2    2.62    0.47
   8  -5  -2    0.22    0.33
   8  -5  -2    0.64    0.28
   8  -5  -2    0.68    0.31
  -8   5   2   -0.15    0.31
   7  -5  -2    2.37    0.42
   7  -5  -2    2.40    0.36
   7  -5  -2    2.27    0.53
   7  -5  -2    2.89    0.55
   7  -5  -2    2.34    0.47
   7  -5  -2    2.08    0.37
  -7   5   2    2.38    0.46
  -7   5   2    2.15    0.39
   6  -5  -2    1.05    0.46
   6  -5  -2    0.56    0.34
   6  -5  -2    0.76    0.44
   6  -5  -2    0.62    0.30
   6  -5  -2    0.71    0.33
   6  -5  -2    1.61    0.36
  -6   5   2    0.53    0.31
   5  -5  -2    5.68    0.58
   5  -5  -2    6.46    0.66
   5  -5  -2    5.81    0.54
   5  -5  -2    5.72    0.62
   5  -5  -2    5.93    0.57
   5  -5  -2    4.91    0.52
  -5   5   2    5.77    0.57
   4  -5  -2    2.03    0.36
   4  -5  -2    2.61    0.40
   4  -5  -2    2.43    0.45
   4  -5  -2    2.00    0.39
   4  -5  -2    2.11    0.47
   4  -5  -2    2.01    0.36
   4  -5  -2    2.35    0.45
  -4   5   2    1.80    0.35
   3  -5  -2    4.70    0.48
   3  -5  -2    4.59    0.55
   3  -5  -2    4.16    0.53
   3  -5  -2    4.44    0.50
   3  -5  -2    4.74    0.50
   3  -5  -2    5.24    0.55
   3  -5  -2    4.90    0.54
   3  -5  -2    4.35    0.53
  -3   5   2    4.12    0.47
   2  -5  -2    2.71    0.46
   2  -5  -2    2.24    0.37
   2  -5  -2    1.74    0.38
   2  -5  -2    1.53    0.41
   2  -5  -2    2.71    0.39
   2  -5  -2    2.31    0.39
   2  -5  -2    2.14    0.40
  -2   5   2    2.43    0.39
   1  -5  -2   10.74    0.64
   1  -5  -2   10.16    0.65
   1  -5  -2   11.77    0.68
   1  -5  -2   11.44    0.78
   1  -5  -2   10.87    0.73
   1  -5  -2   11.16    0.71
   1  -5  -2   10.86    0.74
   1  -5  -2   11.45    0.68
  -1   5   2   11.84    0.63
  -1   5   2   10.88    0.66
   0  -5  -2    0.30    0.28
   0  -5  -2    0.83    0.28
   0  -5  -2    0.65    0.34
   0  -5  -2    0.85    0.37
   0  -5  -2    0.30    0.35
   0  -5  -2    0.42    0.33
   0   5   2    0.58    0.34
   0   5   2    0.36    0.28
  -1  -5  -2    4.72    0.50
  -1  -5  -2    4.75    0.55
  -1  -5  -2    5.63    0.44
  -1  -5  -2    5.28    0.58
  -1  -5  -2    5.27    0.48
  -1  -5  -2    6.54    0.61
   1   5   2    4.84    0.52
   1   5   2    4.37    0.46
  -2  -5  -2    0.05    0.32
  -2  -5  -2    0.02    0.35
  -2  -5  -2    0.47    0.29
  -2  -5  -2    0.07    0.21
  -2  -5  -2    0.26    0.36
  -2  -5  -2   -0.08    0.22
   2   5   2    0.12    0.28
   2   5   2   -0.08    0.34
  -3  -5  -2   13.37    0.58
  -3  -5  -2   13.45    0.78
  -3  -5  -2   12.50    0.72
  -3  -5  -2   13.37    0.76
  -3  -5  -2   12.73    0.80
   3   5   2   13.40    0.71
   3   5   2   13.12    0.75
   3   5   2   11.97    0.77
  -4  -5  -2    0.17    0.17
  -4  -5  -2    0.23    0.29
  -4  -5  -2    0.96    0.39
  -4  -5  -2    0.25    0.16
   4   5   2   -0.19    0.34
   4   5   2    0.13    0.31
   4   5   2    0.39    0.30
  -5  -5  -2    3.62    0.20
  -5  -5  -2    4.17    0.59
  -5  -5  -2    3.45    0.45
   5   5   2    3.25    0.49
   5   5   2    4.43    0.56
   5   5   2    4.20    0.54
  -6  -5  -2    0.18    0.32
  -6  -5  -2    0.61    0.44
   6   5   2    0.38    0.37
  -7  -5  -2    0.31    0.41
  -7  -5  -2   -0.47    0.31
   7   5   2    0.38    0.37
   7   5   2   -0.13    0.39
  -8  -5  -2   -0.03    0.36
  -8  -5  -2    0.40    0.45
   8   5   2   -0.06    0.41
   8   5   2   -0.04    0.42
  -9  -5  -2    0.72    0.39
  -9  -5  -2   -0.24    0.43
   9   5   2    0.01    0.44
   9   5   2    0.55    0.52
 -10  -5  -2   -0.09    0.49
 -10  -5  -2    1.08    0.39
  10   5   2    0.07    0.48
  10   5   2    0.24    0.48
 -11  -5  -2    0.20    0.41
 -11  -5  -2    0.18    0.54
  11   5   2    0.12    0.50
  11   5   2    0.49    0.51
 -12  -5  -2   -0.44    0.55
 -12  -5  -2    0.05    0.44
  12   5   2    0.10    0.58
  12   5   2    1.18    0.66
 -13  -5  -2   -0.88    0.52
 -13  -5  -2   -0.24    0.51
  13   5   2   -0.16    0.67
  13   5   2    0.41    0.61
 -14  -5  -2   -0.21    0.65
 -14  -5  -2   -0.19    0.56
  14   5   2    0.52    0.74
  14   5   2   -0.62    0.66
  13  -6  -2   -0.88    0.84
  13  -6  -2   -0.56    0.67
 -13   6   2    1.25    0.74
 -13   6   2   -0.06    0.59
  12  -6  -2   -0.14    0.61
  12  -6  -2    0.31    0.79
 -12   6   2    0.43    0.57
 -12   6   2    0.57    0.69
  11  -6  -2   -0.03    0.71
  11  -6  -2   -0.43    0.55
  11  -6  -2   -0.24    0.71
 -11   6   2    0.97    0.57
 -11   6   2    0.41    0.59
  10  -6  -2    0.29    0.54
  10  -6  -2    0.74    0.64
  10  -6  -2    0.64    0.74
 -10   6   2   -0.04    0.49
 -10   6   2    0.31    0.63
   9  -6  -2    0.23    0.50
   9  -6  -2    1.20    0.65
   9  -6  -2    0.09    0.36
   9  -6  -2    0.83    0.63
  -9   6   2    0.98    0.51
   8  -6  -2   -0.25    0.53
   8  -6  -2    0.95    0.45
   8  -6  -2    0.12    0.39
   8  -6  -2    0.74    0.70
   7  -6  -2    0.76    0.43
   7  -6  -2   -0.50    0.55
   7  -6  -2    0.27    0.63
   7  -6  -2    0.45    0.38
   6  -6  -2    1.67    0.60
   6  -6  -2    1.41    0.45
   6  -6  -2    1.77    0.48
   5  -6  -2    0.79    0.46
   5  -6  -2    0.25    0.53
   5  -6  -2    0.61    0.39
   5  -6  -2    0.63    0.53
   4  -6  -2    0.68    0.39
   4  -6  -2    0.20    0.44
   4  -6  -2    0.17    0.49
   3  -6  -2    0.21    0.46
   3  -6  -2    0.21    0.45
   3  -6  -2    0.26    0.47
   3  -6  -2    0.18    0.37
   3  -6  -2    0.28    0.43
   2  -6  -2    0.11    0.47
   2  -6  -2    0.21    0.39
   2  -6  -2   -0.30    0.42
   2  -6  -2   -0.31    0.40
   2  -6  -2   -0.74    0.42
   2  -6  -2   -0.35    0.46
  -2   6   2   -0.19    0.39
   1  -6  -2    0.61    0.44
   1  -6  -2   -0.49    0.46
   1  -6  -2    0.01    0.41
   1  -6  -2   -0.36    0.43
   1  -6  -2    0.15    0.38
   1  -6  -2   -0.61    0.43
  -1   6   2    0.42    0.40
   0  -6  -2   -0.20    0.33
   0  -6  -2   -0.52    0.44
   0  -6  -2    0.02    0.45
   0  -6  -2   -0.23    0.42
   0   6   2    0.60    0.37
  -1  -6  -2    0.55    0.35
  -1  -6  -2   -0.50    0.42
  -1  -6  -2    0.07    0.50
  -1  -6  -2   -0.40    0.31
   1   6   2    0.52    0.41
   1   6   2    0.01    0.37
  -2  -6  -2    1.12    0.32
  -2  -6  -2    0.55    0.32
  -2  -6  -2    0.07    0.42
  -2  -6  -2    1.22    0.52
   2   6   2    1.02    0.41
   2   6   2    0.60    0.42
  -3  -6  -2    6.51    0.49
  -3  -6  -2    6.25    0.72
  -3  -6  -2    5.92    0.52
  -3  -6  -2    6.35    0.78
   3   6   2    5.91    0.73
   3   6   2    6.14    0.72
  -4  -6  -2    0.55    0.43
  -4  -6  -2    0.63    0.54
   4   6   2    0.10    0.43
   4   6   2   -0.39    0.40
  -5  -6  -2   -0.31    0.51
  -5  -6  -2    0.16    0.40
   5   6   2    0.54    0.44
   5   6   2   -0.14    0.51
  -6  -6  -2    0.22    0.42
  -6  -6  -2    0.14    0.56
   6   6   2   -0.51    0.52
  -7  -6  -2    1.53    0.60
   7   6   2    0.81    0.53
   7   6   2    0.73    0.49
  -8  -6  -2    0.56    0.47
  -8  -6  -2   -0.37    0.59
   8   6   2    1.03    0.55
   8   6   2   -0.43    0.54
  -9  -6  -2    0.23    0.47
  -9  -6  -2    0.39    0.65
   9   6   2   -1.16    0.56
   9   6   2   -0.36    0.57
 -10  -6  -2   -0.17    0.52
 -10  -6  -2    0.35    0.61
  10   6   2    1.35    0.67
  10   6   2   -0.94    0.67
 -11  -6  -2    0.44    0.57
 -11  -6  -2    1.18    0.73
  11   6   2    0.20    0.76
  11   6   2    0.85    0.72
 -12  -6  -2   -0.18    0.59
 -12  -6  -2    0.65    0.69
  12   6   2   -0.05    0.86
  12   6   2   -1.27    0.80
   9  -7  -2   -0.16    0.87
   9  -7  -2   -0.36    0.65
   9  -7  -2    2.63    1.02
   9  -7  -2   -0.31    0.89
   8  -7  -2   -0.42    0.81
   8  -7  -2    0.57    0.79
   8  -7  -2    0.43    0.79
   8  -7  -2    0.95    0.63
   7  -7  -2    0.97    0.87
   7  -7  -2    0.85    0.60
   7  -7  -2   -0.13    0.68
   7  -7  -2   -1.09    0.76
   6  -7  -2    1.59    0.67
   6  -7  -2   -0.48    0.56
   6  -7  -2    0.27    0.75
   6  -7  -2   -1.05    0.70
   5  -7  -2   -0.02    0.75
   5  -7  -2    0.99    0.57
   5  -7  -2    0.70    0.65
   5  -7  -2    0.61    0.80
   5  -7  -2    2.09    0.65
   4  -7  -2    0.42    0.69
   4  -7  -2    0.88    0.57
   4  -7  -2   -0.03    0.61
   4  -7  -2    1.83    0.59
   4  -7  -2   -0.14    0.69
   3  -7  -2    0.62    0.58
   3  -7  -2   -0.42    0.66
   3  -7  -2    0.26    0.62
   3  -7  -2    0.82    0.66
   3  -7  -2    1.11    0.58
   2  -7  -2   -0.59    0.58
   2  -7  -2   -0.59    0.68
   2  -7  -2    0.38    0.66
   2  -7  -2    0.82    0.54
   2  -7  -2   -1.19    0.54
   1  -7  -2    0.13    0.67
   1  -7  -2   -0.12    0.57
   1  -7  -2    0.28    0.58
   1  -7  -2    0.62    0.59
   1  -7  -2    0.04    0.50
  -1   7   2   -0.39    0.57
   0  -7  -2    0.40    0.69
   0  -7  -2    0.16    0.60
   0  -7  -2   -1.24    0.54
   0  -7  -2   -0.47    0.48
   0  -7  -2   -1.48    0.66
   0   7   2    0.53    0.57
  -1  -7  -2   -0.09    0.65
  -1  -7  -2    0.24    0.58
  -1  -7  -2   -0.07    0.45
  -1  -7  -2   -0.22    0.64
   1   7   2    0.25    0.47
   1   7   2    0.35    0.60
  -2  -7  -2   -0.36    0.65
  -2  -7  -2   -0.30    0.56
   2   7   2    1.18    0.64
  -3  -7  -2    0.06    0.60
  -3  -7  -2    1.04    0.71
   3   7   2    0.46    0.68
   3   7   2   -0.19    0.53
  -4  -7  -2    0.72    0.62
  -4  -7  -2    0.02    0.76
   4   7   2    1.19    0.72
   4   7   2    0.25    0.56
  -5  -7  -2    0.97    0.76
  -5  -7  -2    0.46    0.63
   5   7   2   -0.24    0.61
   5   7   2    0.15    0.62
  -6  -7  -2    0.47    0.64
  -6  -7  -2    0.94    0.75
   6   7   2   -0.61    0.61
   6   7   2    0.47    0.64
  -7  -7  -2   -0.07    0.62
  -7  -7  -2    0.11    0.73
   7   7   2    0.67    0.80
   7   7   2    1.46    0.71
  -8  -7  -2    1.19    0.70
  -8  -7  -2    1.24    0.81
   8   7   2    0.43    0.72
   8   7   2   -0.11    0.75
   9   7  -3    1.20    0.87
  -9  -7   3    0.45    0.72
  -9  -7   3    0.30    0.96
   8   7  -3    1.04    0.81
  -8  -7   3    0.83    0.75
  -8  -7   3    2.35    0.81
   7   7  -3    0.27    0.56
   7   7  -3    1.07    0.67
  -7  -7   3    1.29    0.86
  -7  -7   3    1.34    0.67
   6   7  -3    0.28    0.70
   6   7  -3   -0.24    0.49
  -6  -7   3    0.36    0.73
  -6  -7   3   -0.34    0.60
   5   7  -3    0.96    0.49
   5   7  -3    1.39    0.64
  -5  -7   3    0.68    0.68
  -5  -7   3    1.19    0.69
   4   7  -3   -0.36    0.44
   4   7  -3    0.32    0.65
  -4  -7   3   -0.14    0.72
  -4  -7   3    0.91    0.67
   3   7  -3   -0.12    0.61
  -3  -7   3    0.17    0.71
  -3  -7   3    0.07    0.58
  -3  -7   3   -0.15    0.52
   2   7  -3    0.16    0.55
  -2  -7   3   -0.01    0.59
  -2  -7   3   -0.57    0.64
  -2  -7   3   -0.22    0.46
   1   7  -3   -0.44    0.52
  -1  -7   3   -1.25    0.61
  -1  -7   3   -1.11    0.62
  -1  -7   3    0.64    0.45
   0   7  -3   -0.16    0.57
   0  -7   3   -0.81    0.44
   0  -7   3   -0.90    0.67
   0  -7   3    0.12    0.64
  -1   7  -3    0.06    0.55
   1  -7   3    0.20    0.73
   1  -7   3    0.37    0.66
   1  -7   3   -0.37    0.53
  -2   7  -3    0.56    0.58
  -2   7  -3    0.14    0.63
   2  -7   3    0.24    0.58
   2  -7   3   -0.76    0.70
   2  -7   3    0.07    0.66
  -3   7  -3    1.03    0.63
  -3   7  -3    0.07    0.56
   3  -7   3    0.07    0.61
   3  -7   3    0.26    0.76
   3  -7   3    0.86    0.75
  -4   7  -3    0.15    0.54
  -4   7  -3    1.33    0.64
   4  -7   3    0.78    0.66
   4  -7   3   -0.13    0.63
   4  -7   3    0.74    0.78
  -5   7  -3    0.33    0.69
   5  -7   3    0.41    0.72
   5  -7   3    0.17    0.64
   5  -7   3   -0.55    0.72
  -6   7  -3    1.11    0.68
   6  -7   3   -0.50    0.92
   6  -7   3    0.48    0.73
  -7   7  -3    0.76    0.75
   7  -7   3    0.37    0.82
   7  -7   3   -1.05    0.91
  13   6  -3    1.50    0.86
  13   6  -3    0.15    0.72
 -13  -6   3    0.46    0.66
 -13  -6   3   -0.54    0.80
  12   6  -3    0.83    0.69
  12   6  -3    0.52    0.65
 -12  -6   3    1.00    0.80
 -12  -6   3    0.51    0.59
  11   6  -3   -0.96    0.56
  11   6  -3    0.22    0.65
 -11  -6   3   -0.57    0.67
 -11  -6   3   -0.41    0.54
  10   6  -3    0.97    0.53
  10   6  -3   -0.12    0.57
 -10  -6   3    0.45    0.57
 -10  -6   3    0.85    0.62
   9   6  -3    1.35    0.50
   9   6  -3    0.78    0.58
  -9  -6   3   -0.16    0.60
  -9  -6   3    0.12    0.50
   8   6  -3    0.71    0.59
   8   6  -3    0.77    0.43
  -8  -6   3    0.54    0.60
  -8  -6   3    0.53    0.50
   7   6  -3    0.33    0.53
   7   6  -3    0.28    0.39
  -7  -6   3    0.84    0.50
  -7  -6   3    0.41    0.53
   6   6  -3    1.01    0.49
   6   6  -3    1.09    0.39
  -6  -6   3    0.81    0.56
  -6  -6   3    1.42    0.51
   5   6  -3   -0.07    0.34
   5   6  -3    0.21    0.44
  -5  -6   3    0.58    0.45
  -5  -6   3   -0.76    0.38
  -5  -6   3   -0.14    0.57
   4   6  -3    1.62    0.38
   4   6  -3    2.35    0.51
  -4  -6   3    2.32    0.62
  -4  -6   3    1.03    0.40
  -4  -6   3    2.39    0.28
  -4  -6   3    1.35    0.53
   3   6  -3    0.69    0.43
   3   6  -3    0.60    0.32
  -3  -6   3    1.00    0.55
  -3  -6   3    1.11    0.47
  -3  -6   3    0.86    0.27
  -3  -6   3    0.87    0.30
   2   6  -3    2.39    0.36
  -2  -6   3    2.17    0.36
  -2  -6   3    2.08    0.55
  -2  -6   3    2.42    0.38
  -2  -6   3    2.60    0.56
   1   6  -3    0.65    0.43
  -1  -6   3    0.12    0.48
  -1  -6   3   -0.31    0.32
  -1  -6   3   -0.46    0.51
  -1  -6   3   -0.41    0.32
  -1  -6   3    0.23    0.33
   0   6  -3    0.68    0.41
   0   6  -3    0.18    0.41
   0  -6   3    0.24    0.36
   0  -6   3    0.48    0.46
   0  -6   3    0.79    0.33
   0  -6   3    0.41    0.41
   0  -6   3   -0.37    0.46
   0  -6   3    0.35    0.30
  -1   6  -3    0.50    0.36
  -1   6  -3   -0.14    0.35
   1  -6   3   -0.01    0.33
   1  -6   3   -0.23    0.36
   1  -6   3    0.04    0.44
   1  -6   3    0.29    0.51
   1  -6   3   -0.42    0.30
   1  -6   3   -0.26    0.47
  -2   6  -3    1.05    0.45
  -2   6  -3    1.33    0.41
   2  -6   3    1.22    0.45
   2  -6   3    0.90    0.53
   2  -6   3    1.49    0.34
   2  -6   3    1.12    0.37
  -3   6  -3    3.16    0.56
  -3   6  -3    2.79    0.46
   3  -6   3    2.71    0.43
   3  -6   3    2.69    0.54
   3  -6   3    1.77    0.55
   3  -6   3    3.50    0.40
  -4   6  -3    0.85    0.42
  -4   6  -3    0.78    0.42
   4  -6   3    0.64    0.42
   4  -6   3    0.72    0.51
   4  -6   3    0.40    0.32
   4  -6   3    0.63    0.42
   4  -6   3    0.36    0.52
  -5   6  -3   -0.01    0.32
  -5   6  -3   -0.14    0.43
   5  -6   3    0.12    0.43
   5  -6   3    0.16    0.31
   5  -6   3   -0.20    0.42
   5  -6   3   -0.16    0.52
   5  -6   3   -0.22    0.61
  -6   6  -3    1.65    0.49
   6  -6   3    1.07    0.60
   6  -6   3    1.17    0.68
   6  -6   3    1.79    0.43
   6  -6   3    1.45    0.39
  -7   6  -3   -0.39    0.47
   7  -6   3   -0.08    0.35
   7  -6   3    0.17    0.67
   7  -6   3   -0.44    0.36
   7  -6   3   -0.27    0.60
  -8   6  -3   -0.20    0.50
   8  -6   3   -0.32    0.40
   8  -6   3    0.12    0.68
   8  -6   3   -0.15    0.69
  -9   6  -3    0.10    0.54
   9  -6   3    0.08    0.72
   9  -6   3    0.40    0.78
   9  -6   3    0.39    0.44
 -10   6  -3    0.09    0.56
  10  -6   3   -0.20    0.48
  10  -6   3    0.17    0.79
  10  -6   3    1.81    0.80
 -11   6  -3   -1.25    0.58
 -11   6  -3    0.15    0.74
  11  -6   3    0.49    0.81
  11  -6   3   -0.06    0.83
  15   5  -3    0.01    0.76
  15   5  -3    0.56    0.62
 -15  -5   3    0.30    0.60
 -15  -5   3    0.38    0.63
  14   5  -3    0.10    0.62
  14   5  -3   -0.26    0.59
 -14  -5   3    0.79    0.66
 -14  -5   3    0.04    0.55
  13   5  -3    0.22    0.52
  13   5  -3    0.41    0.58
 -13  -5   3   -0.36    0.55
 -13  -5   3   -0.16    0.45
  12   5  -3    0.93    0.52
  12   5  -3    0.21    0.52
 -12  -5   3    0.60    0.52
 -12  -5   3    0.05    0.45
  11   5  -3    0.58    0.56
  11   5  -3    0.43    0.46
 -11  -5   3    0.07    0.52
 -11  -5   3    0.87    0.43
  10   5  -3    0.96    0.45
  10   5  -3    1.60    0.55
 -10  -5   3    0.97    0.40
 -10  -5   3    2.22    0.57
   9   5  -3    0.11    0.33
   9   5  -3    0.31    0.46
  -9  -5   3    0.27    0.49
   8   5  -3    0.39    0.33
   8   5  -3    0.14    0.39
  -8  -5   3   -0.15    0.40
  -8  -5   3    0.22    0.37
  -8  -5   3    0.63    0.47
   7   5  -3    1.64    0.36
  -7  -5   3    1.99    0.40
  -7  -5   3    1.82    0.43
   6   5  -3    2.01    0.34
   6   5  -3    1.54    0.38
  -6  -5   3    1.24    0.33
  -6  -5   3    1.57    0.40
  -6  -5   3    1.86    0.46
   5   5  -3    0.00    0.32
   5   5  -3    0.18    0.27
  -5  -5   3    0.42    0.33
  -5  -5   3    0.00    0.37
  -5  -5   3   -0.35    0.26
   4   5  -3    1.40    0.27
   4   5  -3    0.86    0.35
  -4  -5   3    1.31    0.28
  -4  -5   3    1.33    0.17
  -4  -5   3    0.83    0.43
  -4  -5   3    1.02    0.35
  -4  -5   3    1.30    0.19
   3   5  -3    6.33    0.61
   3   5  -3    5.40    0.43
  -3  -5   3    5.52    0.63
  -3  -5   3    5.48    0.38
  -3  -5   3    5.79    0.56
  -3  -5   3    5.61    0.45
   2   5  -3   -0.25    0.20
   2   5  -3    0.08    0.28
  -2  -5   3   -0.15    0.34
  -2  -5   3    0.28    0.22
  -2  -5   3   -0.16    0.22
  -2  -5   3    0.24    0.34
  -2  -5   3    0.16    0.20
   1   5  -3    1.04    0.22
   1   5  -3    1.30    0.35
   1   5  -3    1.22    0.31
  -1  -5   3    1.30    0.29
  -1  -5   3    1.11    0.24
  -1  -5   3    1.22    0.39
  -1  -5   3    0.97    0.27
  -1  -5   3    0.50    0.34
  -1  -5   3    1.04    0.36
  -1  -5   3    0.85    0.26
   0   5  -3    3.33    0.44
   0   5  -3    3.18    0.40
   0  -5   3    2.91    0.38
   0  -5   3    2.34    0.35
   0  -5   3    3.32    0.37
   0  -5   3    2.60    0.31
   0  -5   3    3.35    0.40
   0  -5   3    3.70    0.50
  -1   5  -3    3.79    0.48
  -1   5  -3    3.40    0.41
   1  -5   3    3.69    0.44
   1  -5   3    3.54    0.43
   1  -5   3    3.31    0.54
   1  -5   3    3.09    0.40
   1  -5   3    2.86    0.33
   1  -5   3    3.18    0.36
  -2   5  -3    4.20    0.48
  -2   5  -3    4.37    0.54
   2  -5   3    4.91    0.57
   2  -5   3    5.18    0.43
   2  -5   3    5.14    0.59
   2  -5   3    4.53    0.60
   2  -5   3    4.76    0.40
   2  -5   3    4.96    0.50
  -3   5  -3    1.46    0.35
  -3   5  -3    0.89    0.29
   3  -5   3    0.43    0.41
   3  -5   3    0.43    0.34
   3  -5   3    0.37    0.29
   3  -5   3    1.09    0.27
   3  -5   3    1.10    0.25
  -4   5  -3    6.72    0.60
  -4   5  -3    6.11    0.53
   4  -5   3    6.85    0.50
   4  -5   3    5.66    0.48
   4  -5   3    6.76    0.47
   4  -5   3    7.24    0.74
   4  -5   3    7.65    0.68
  -5   5  -3    0.38    0.27
  -5   5  -3   -0.14    0.32
   5  -5   3    0.46    0.38
   5  -5   3    1.03    0.27
   5  -5   3    0.34    0.46
   5  -5   3   -0.11    0.22
   5  -5   3    0.65    0.27
  -6   5  -3   15.77    0.86
   6  -5   3   17.80    0.75
   6  -5   3   17.25    0.69
   6  -5   3   16.25    0.74
   6  -5   3   17.79    1.02
   6  -5   3   17.26    0.81
   6  -5   3   19.15    1.07
  -7   5  -3    2.74    0.46
  -7   5  -3    2.30    0.50
   7  -5   3    2.12    0.29
   7  -5   3    2.54    0.34
   7  -5   3    2.73    0.55
   7  -5   3    2.57    0.37
  -8   5  -3    0.06    0.43
  -8   5  -3    0.17    0.38
   8  -5   3    0.38    0.49
   8  -5   3    0.48    0.49
   8  -5   3    0.02    0.29
   8  -5   3   -0.04    0.40
   8  -5   3    0.43    0.24
  -9   5  -3   -0.02    0.45
   9  -5   3    0.35    0.36
   9  -5   3    0.59    0.54
   9  -5   3    0.63    0.49
   9  -5   3    0.38    0.50
 -10   5  -3   -0.02    0.40
 -10   5  -3    0.66    0.49
  10  -5   3   -0.91    0.59
  10  -5   3   -0.30    0.36
 -11   5  -3    0.36    0.48
 -11   5  -3   -0.15    0.54
  11  -5   3    0.46    0.47
  11  -5   3   -0.45    0.62
 -12   5  -3    0.02    0.53
 -12   5  -3    0.68    0.62
  12  -5   3    0.67    0.70
 -13   5  -3   -0.04    0.68
 -13   5  -3   -0.62    0.56
  13  -5   3    0.80    0.76
  13  -5   3    0.87    0.59
 -14   5  -3    1.18    0.66
 -14   5  -3   -0.28    0.72
  14  -5   3    1.52    0.91
  14  -5   3    1.50    0.69
  17   4  -3    0.08    0.66
  17   4  -3   -1.20    0.65
 -17  -4   3    0.59    0.60
 -17  -4   3    0.36    0.61
  16   4  -3   -1.51    0.54
  16   4  -3    0.43    0.70
 -16  -4   3   -0.24    0.54
 -16  -4   3   -0.14    0.50
  15   4  -3   -0.43    0.51
  15   4  -3   -0.03    0.63
 -15  -4   3    0.13    0.46
 -15  -4   3   -0.04    0.47
  14   4  -3    1.44    0.53
  14   4  -3    0.49    0.45
 -14  -4   3    1.88    0.50
 -14  -4   3    1.43    0.48
  13   4  -3   -0.16    0.46
  13   4  -3   -0.24    0.38
 -13  -4   3   -0.17    0.38
 -13  -4   3    0.29    0.41
  12   4  -3    0.99    0.40
  12   4  -3    0.94    0.45
 -12  -4   3    0.19    0.41
  11   4  -3    0.77    0.34
 -11  -4   3    0.13    0.33
 -11  -4   3    0.13    0.38
  10   4  -3    1.07    0.40
  10   4  -3    1.23    0.32
 -10  -4   3    1.57    0.40
 -10  -4   3    1.30    0.37
   9   4  -3    4.26    0.48
   9   4  -3    3.75    0.50
  -9  -4   3    4.90    0.61
  -9  -4   3    4.18    0.46
   8   4  -3   10.70    0.61
   8   4  -3   10.43    0.69
  -8  -4   3   10.91    0.63
  -8  -4   3   11.36    0.76
  -8  -4   3   10.88    0.67
   7   4  -3    2.36    0.39
   7   4  -3    2.89    0.35
  -7  -4   3    1.53    0.33
  -7  -4   3    2.70    0.42
  -7  -4   3    1.82    0.30
   6   4  -3   15.24    0.78
   6   4  -3   16.49    0.84
   6   4  -3   15.93    0.67
  -6  -4   3   16.49    0.78
  -6  -4   3   16.11    0.67
  -6  -4   3   15.68    0.80
   5   4  -3    0.40    0.26
   5   4  -3    0.42    0.21
  -5  -4   3    0.47    0.31
  -5  -4   3    0.15    0.20
  -5  -4   3    0.41    0.26
   4   4  -3    1.68    0.24
   4   4  -3    1.21    0.29
  -4  -4   3    1.70    0.36
  -4  -4   3    1.81    0.18
  -4  -4   3    1.20    0.30
  -4  -4   3    1.73    0.18
  -4  -4   3    1.83    0.25
   3   4  -3    2.00    0.33
   3   4  -3    1.99    0.24
  -3  -4   3    2.25    0.28
  -3  -4   3    1.95    0.20
  -3  -4   3    1.45    0.18
  -3  -4   3    1.50    0.32
  -3  -4   3    1.70    0.30
   2   4  -3    0.30    0.22
   2   4  -3    0.21    0.16
   2   4  -3    0.26    0.22
  -2  -4   3    0.36    0.26
  -2  -4   3    0.12    0.16
  -2  -4   3    0.10    0.15
  -2  -4   3    0.33    0.25
  -2  -4   3   -0.01    0.24
   1   4  -3    2.00    0.32
   1   4  -3    1.73    0.29
   1   4  -3    1.97    0.21
  -1  -4   3    1.56    0.23
  -1  -4   3    1.92    0.24
  -1  -4   3    1.36    0.26
  -1  -4   3    1.51    0.31
   0   4  -3    2.40    0.29
   0   4  -3    3.20    0.39
   0   4  -3    2.40    0.29
   0  -4   3    2.39    0.29
   0  -4   3    2.74    0.27
   0  -4   3    3.03    0.40
   0  -4   3    2.60    0.30
   0  -4   3    2.76    0.32
  -1   4  -3    0.49    0.22
  -1   4  -3    0.19    0.26
  -1   4  -3    0.11    0.25
   1  -4   3    0.51    0.27
   1  -4   3    0.54    0.22
   1  -4   3    0.39    0.22
   1  -4   3    0.32    0.17
   1  -4   3    0.09    0.19
  -2   4  -3   22.48    0.85
  -2   4  -3   21.64    0.79
  -2   4  -3   21.35    0.88
   2  -4   3   22.99    0.74
   2  -4   3   22.52    0.88
   2  -4   3   23.49    0.90
   2  -4   3   22.70    0.80
   2  -4   3   22.95    0.98
  -3   4  -3    4.56    0.52
  -3   4  -3    5.19    0.44
  -3   4  -3    5.86    0.39
   3  -4   3    5.86    0.36
   3  -4   3    5.63    0.39
   3  -4   3    6.05    0.50
   3  -4   3    6.17    0.58
   3  -4   3    5.99    0.55
   3  -4   3    5.56    0.35
  -4   4  -3    0.17    0.19
  -4   4  -3    0.58    0.28
   4  -4   3    0.24    0.23
   4  -4   3    0.31    0.20
   4  -4   3    0.82    0.32
   4  -4   3    0.38    0.19
   4  -4   3    0.11    0.18
  -5   4  -3    3.00    0.32
  -5   4  -3    2.52    0.35
  -5   4  -3    3.08    0.43
   5  -4   3    2.54    0.28
   5  -4   3    2.75    0.28
   5  -4   3    2.16    0.37
   5  -4   3    2.45    0.44
   5  -4   3    2.93    0.36
  -6   4  -3    0.53    0.26
  -6   4  -3    0.35    0.28
  -6   4  -3    0.60    0.31
   6  -4   3    0.75    0.20
   6  -4   3    0.44    0.25
   6  -4   3    0.62    0.33
   6  -4   3    0.51    0.25
   6  -4   3    0.49    0.21
  -7   4  -3    0.81    0.31
  -7   4  -3    0.88    0.29
  -7   4  -3    0.82    0.28
   7  -4   3    0.76    0.25
   7  -4   3    0.31    0.37
   7  -4   3    0.34    0.28
   7  -4   3    0.41    0.14
   7  -4   3    0.26    0.15
  -8   4  -3    5.28    0.64
  -8   4  -3    5.81    0.55
  -8   4  -3    5.16    0.53
   8  -4   3    6.32    0.51
   8  -4   3    6.06    0.22
   8  -4   3    6.29    0.73
  -9   4  -3    2.63    0.41
  -9   4  -3    4.45    0.51
   9  -4   3    3.14    0.38
 -10   4  -3   -0.18    0.37
 -10   4  -3   -0.05    0.32
  10  -4   3    0.08    0.46
  10  -4   3   -0.08    0.33
 -11   4  -3    0.54    0.37
 -11   4  -3    0.43    0.42
  11  -4   3    0.27    0.35
  11  -4   3   -0.19    0.53
 -12   4  -3    1.18    0.54
  12  -4   3    0.24    0.42
  12  -4   3    1.23    0.66
 -13   4  -3    0.16    0.46
 -13   4  -3    0.00    0.57
  13  -4   3    0.21    0.61
  13  -4   3    0.36    0.48
 -14   4  -3    1.18    0.65
 -14   4  -3    0.74    0.54
  14  -4   3    0.60    0.76
  14  -4   3    0.95    0.55
 -15   4  -3    1.43    0.74
 -15   4  -3    0.97    0.60
  15  -4   3   -1.10    0.75
  15  -4   3    1.16    0.67
  18   3  -3    0.39    0.67
  18   3  -3    1.05    0.76
 -18  -3   3    1.36    0.56
 -18  -3   3    0.83    0.53
  17   3  -3   -0.07    0.57
  17   3  -3    0.36    0.65
 -17  -3   3    1.04    0.45
 -17  -3   3   -0.22    0.49
  16   3  -3    0.68    0.48
  16   3  -3    0.40    0.50
 -16  -3   3    0.89    0.45
 -16  -3   3    0.56    0.45
  15   3  -3    1.56    0.53
  15   3  -3    1.87    0.50
 -15  -3   3    1.03    0.41
 -15  -3   3    2.16    0.44
  14   3  -3    5.86    0.28
  14   3  -3    5.94    0.70
  14   3  -3    6.30    0.75
 -14  -3   3    7.96    0.68
 -14  -3   3    5.33    0.58
  13   3  -3    0.20    0.36
  13   3  -3    0.30    0.43
 -13  -3   3    0.63    0.35
 -13  -3   3    0.59    0.35
  12   3  -3    0.08    0.28
  12   3  -3   -0.11    0.37
 -12  -3   3    0.15    0.28
 -12  -3   3    0.28    0.31
  11   3  -3    0.15    0.24
  11   3  -3   -0.07    0.29
 -11  -3   3   -0.36    0.29
 -11  -3   3    0.15    0.24
  10   3  -3    2.26    0.41
  10   3  -3    1.92    0.34
 -10  -3   3    2.22    0.36
 -10  -3   3    1.75    0.32
 -10  -3   3    1.96    0.35
   9   3  -3    0.46    0.28
   9   3  -3    0.12    0.28
   9   3  -3    0.46    0.23
  -9  -3   3    0.69    0.28
  -9  -3   3    0.93    0.25
  -9  -3   3    0.65    0.26
   8   3  -3    5.62    0.52
   8   3  -3    6.08    0.43
  -8  -3   3    6.08    0.50
  -8  -3   3    5.61    0.43
  -8  -3   3    5.41    0.42
   7   3  -3    1.74    0.26
   7   3  -3    1.53    0.27
  -7  -3   3    1.03    0.27
  -7  -3   3    1.29    0.23
  -7  -3   3    1.35    0.24
   6   3  -3    0.72    0.17
   6   3  -3    0.47    0.20
   6   3  -3    0.35    0.21
  -6  -3   3    0.61    0.19
  -6  -3   3    0.36    0.24
  -6  -3   3    0.25    0.17
   5   3  -3    0.31    0.14
   5   3  -3   -0.11    0.15
  -5  -3   3   -0.37    0.20
  -5  -3   3    0.02    0.18
  -5  -3   3    0.12    0.14
  -5  -3   3    0.08    0.17
   4   3  -3   22.18    0.72
   4   3  -3   22.73    0.82
  -4  -3   3   23.94    0.83
  -4  -3   3   22.75    0.60
  -4  -3   3   20.20    0.73
  -4  -3   3   23.00    0.86
  -4  -3   3   22.02    0.79
  -4  -3   3   22.49    0.60
   3   3  -3    1.20    0.21
   3   3  -3    1.34    0.14
   3   3  -3    1.65    0.23
  -3  -3   3    1.32    0.16
  -3  -3   3    1.49    0.25
  -3  -3   3    1.20    0.13
  -3  -3   3    1.25    0.22
  -3  -3   3    1.51    0.25
  -3  -3   3    1.31    0.14
   2   3  -3   67.70    1.85
   2   3  -3   72.39    1.98
   2   3  -3   69.37    1.96
   2   3  -3   73.78    1.87
  -2  -3   3   71.02    1.89
  -2  -3   3   72.51    1.88
  -2  -3   3   72.75    2.05
   1   3  -3   40.69    1.10
   1   3  -3   40.47    1.16
   1   3  -3   40.06    1.22
   1   3  -3   39.84    1.22
  -1  -3   3   40.64    1.09
  -1  -3   3   40.10    1.27
  -1  -3   3   39.27    1.18
   0   3  -3    0.23    0.15
   0   3  -3    0.26    0.17
   0   3  -3    0.32    0.15
   0  -3   3    0.18    0.14
   0  -3   3    0.26    0.10
   0  -3   3    0.19    0.10
   0  -3   3   -0.03    0.15
   0  -3   3    0.17    0.17
   0  -3   3    0.02    0.13
  -1   3  -3    1.40    0.20
  -1   3  -3    1.55    0.22
  -1   3  -3    1.79    0.23
   1  -3   3    1.62    0.22
   1  -3   3    1.80    0.23
   1  -3   3    1.58    0.25
   1  -3   3    1.84    0.20
   1  -3   3    1.57    0.17
   1  -3   3    1.43    0.16
   1  -3   3    1.72    0.22
  -2   3  -3    4.68    0.33
  -2   3  -3    5.00    0.38
  -2   3  -3    4.77    0.30
   2  -3   3    5.08    0.29
   2  -3   3    5.12    0.37
   2  -3   3    5.24    0.26
   2  -3   3    5.33    0.28
   2  -3   3    5.36    0.44
  -3   3  -3   -0.14    0.17
  -3   3  -3    0.02    0.15
  -3   3  -3    0.01    0.20
   3  -3   3    0.04    0.17
   3  -3   3    0.01    0.10
   3  -3   3    0.05    0.15
   3  -3   3   -0.07    0.18
   3  -3   3    0.10    0.12
  -4   3  -3    2.79    0.35
  -4   3  -3    2.14    0.28
  -4   3  -3    2.50    0.21
  -4   3  -3    2.56    0.32
   4  -3   3    2.36    0.19
   4  -3   3    2.31    0.23
   4  -3   3    2.70    0.32
  -5   3  -3    0.40    0.22
  -5   3  -3    0.72    0.20
  -5   3  -3    0.90    0.21
  -5   3  -3    0.56    0.12
   5  -3   3    0.84    0.18
   5  -3   3    0.55    0.11
   5  -3   3    0.54    0.15
   5  -3   3    0.60    0.23
  -6   3  -3   16.84    0.65
  -6   3  -3   17.00    0.68
  -6   3  -3   17.22    0.76
   6  -3   3   18.00    0.65
   6  -3   3   16.82    0.51
   6  -3   3   17.84    0.50
   6  -3   3   17.79    0.80
  -7   3  -3    1.67    0.26
  -7   3  -3    0.86    0.27
  -7   3  -3    1.16    0.25
   7  -3   3    0.78    0.27
   7  -3   3    1.38    0.23
  -8   3  -3    4.69    0.41
  -8   3  -3    4.41    0.47
  -8   3  -3    4.69    0.50
   8  -3   3    4.00    0.39
   8  -3   3    4.77    0.57
   8  -3   3    5.11    0.38
  -9   3  -3    0.26    0.24
  -9   3  -3    0.39    0.30
  -9   3  -3    0.54    0.30
   9  -3   3    0.91    0.39
   9  -3   3    0.67    0.27
   9  -3   3    0.42    0.21
 -10   3  -3    4.28    0.46
 -10   3  -3    4.89    0.61
 -10   3  -3    5.25    0.58
  10  -3   3    5.50    0.63
  10  -3   3    4.35    0.50
 -11   3  -3    0.37    0.27
  11  -3   3    0.54    0.33
 -12   3  -3    0.27    0.29
 -12   3  -3    0.37    0.40
  12  -3   3    0.26    0.51
  12  -3   3    0.17    0.35
 -13   3  -3   -0.01    0.38
 -13   3  -3   -0.28    0.32
  13  -3   3    0.06    0.41
  13  -3   3   -0.27    0.50
 -14   3  -3    2.24    0.58
  14  -3   3    1.89    0.65
  14  -3   3    1.97    0.55
 -15   3  -3    0.82    0.58
 -15   3  -3    1.07    0.45
  15  -3   3    0.99    0.73
  15  -3   3    0.65    0.53
 -16   3  -3    1.76    0.68
 -16   3  -3    1.13    0.51
  16  -3   3    1.37    0.78
  16  -3   3    0.55    0.63
 -17   3  -3    0.55    0.59
 -17   3  -3    0.72    0.67
  17  -3   3    0.44    0.73
  17  -3   3    0.24    0.90
  19   2  -3    2.05    0.74
  19   2  -3    0.26    0.68
 -19  -2   3    1.49    0.66
 -19  -2   3    1.11    0.46
  18   2  -3    0.83    0.60
  18   2  -3    0.30    0.63
 -18  -2   3    1.02    0.42
 -18  -2   3    0.77    0.54
  17   2  -3    0.98    0.40
  17   2  -3   -0.55    0.50
  17   2  -3   -0.16    0.57
 -17  -2   3   -0.09    0.35
 -17  -2   3    0.33    0.45
  16   2  -3   -0.13    0.46
  16   2  -3    0.51    0.48
  16   2  -3    0.37    0.31
 -16  -2   3   -0.10    0.33
 -16  -2   3    0.27    0.38
  15   2  -3    2.84    0.38
  15   2  -3    2.72    0.48
  15   2  -3    2.53    0.35
  15   2  -3    2.21    0.48
 -15  -2   3    2.25    0.45
 -15  -2   3    2.87    0.37
  14   2  -3    2.23    0.46
  14   2  -3    2.28    0.32
  14   2  -3    1.80    0.29
 -14  -2   3    2.23    0.35
 -14  -2   3    2.12    0.38
  13   2  -3    0.08    0.33
  13   2  -3    0.57    0.23
  13   2  -3    0.25    0.28
  13   2  -3    0.26    0.22
 -13  -2   3    0.55    0.31
 -13  -2   3    0.09    0.27
 -13  -2   3   -0.44    0.22
  12   2  -3    1.38    0.41
  12   2  -3    1.78    0.24
  12   2  -3    1.83    0.32
  12   2  -3    1.86    0.24
  12   2  -3    1.23    0.33
 -12  -2   3    1.69    0.34
 -12  -2   3    1.80    0.29
 -12  -2   3    1.32    0.27
  11   2  -3    0.49    0.34
  11   2  -3    0.76    0.28
  11   2  -3    0.64    0.18
  11   2  -3    1.10    0.28
 -11  -2   3    0.67    0.25
 -11  -2   3    0.23    0.25
 -11  -2   3    0.96    0.24
  10   2  -3   -0.13    0.11
  10   2  -3   -0.02    0.28
  10   2  -3   -0.20    0.11
  10   2  -3   -0.15    0.24
  10   2  -3   -0.03    0.18
 -10  -2   3   -0.33    0.21
 -10  -2   3    0.16    0.20
 -10  -2   3   -0.01    0.16
   9   2  -3    5.18    0.45
   9   2  -3    5.62    0.26
   9   2  -3    5.42    0.25
   9   2  -3    5.15    0.40
   9   2  -3    5.71    0.40
  -9  -2   3    5.36    0.37
  -9  -2   3    5.20    0.43
  -9  -2   3    5.38    0.36
  -9  -2   3    5.21    0.39
   8   2  -3    4.57    0.34
   8   2  -3    4.48    0.20
   8   2  -3    4.84    0.35
   8   2  -3    4.43    0.20
  -8  -2   3    4.69    0.35
  -8  -2   3    4.31    0.35
  -8  -2   3    4.61    0.36
  -8  -2   3    4.39    0.35
   7   2  -3    4.19    0.34
   7   2  -3    3.05    0.14
   7   2  -3    3.44    0.33
   7   2  -3    3.51    0.15
   7   2  -3    3.60    0.29
  -7  -2   3    3.64    0.31
  -7  -2   3    3.30    0.30
  -7  -2   3    3.99    0.31
  -7  -2   3    3.75    0.32
   6   2  -3   27.50    0.86
   6   2  -3   27.08    0.90
  -6  -2   3   27.08    0.86
  -6  -2   3   28.08    0.91
  -6  -2   3   27.81    0.89
  -6  -2   3   28.21    0.90
   5   2  -3   34.06    1.03
   5   2  -3   32.38    0.97
  -5  -2   3   34.61    1.05
  -5  -2   3   33.28    1.04
  -5  -2   3   34.56    1.03
   4   2  -3    0.20    0.09
   4   2  -3    0.22    0.11
  -4  -2   3   -0.11    0.10
  -4  -2   3    0.03    0.04
  -4  -2   3    0.14    0.14
  -4  -2   3    0.11    0.13
  -4  -2   3    0.05    0.09
   3   2  -3    5.40    0.23
   3   2  -3    5.28    0.20
   3   2  -3    5.31    0.29
  -3  -2   3    5.43    0.32
  -3  -2   3    5.70    0.28
  -3  -2   3    5.23    0.19
  -3  -2   3    5.50    0.24
  -3  -2   3    5.81    0.32
   2   2  -3   16.04    0.55
   2   2  -3   15.85    0.55
   2   2  -3   15.63    0.48
   2   2  -3   15.89    0.47
  -2  -2   3   15.99    0.47
  -2  -2   3   16.20    0.59
  -2  -2   3   16.05    0.48
   1   2  -3   27.98    0.80
   1   2  -3   27.95    0.74
  -1  -2   3   29.04    0.77
  -1  -2   3   29.69    0.92
  -1  -2   3   29.10    0.83
  -1  -2   3   29.94    0.86
  -1  -2   3   29.34    0.87
   0   2  -3   -0.04    0.07
   0   2  -3    0.01    0.09
   0   2  -3   -0.09    0.08
   0  -2   3   -0.05    0.05
   0  -2   3    0.03    0.09
   0  -2   3    0.11    0.08
   0  -2   3   -0.10    0.11
   0  -2   3   -0.02    0.11
   0  -2   3    0.02    0.07
   0  -2   3   -0.07    0.04
  -1   2  -3    5.70    0.30
  -1   2  -3    5.72    0.25
  -1   2  -3    5.65    0.29
   1  -2   3    5.83    0.34
   1  -2   3    5.79    0.24
   1  -2   3    6.05    0.28
   1  -2   3    5.94    0.21
   1  -2   3    5.83    0.32
   1  -2   3    5.82    0.21
  -2   2  -3   78.02    2.00
  -2   2  -3   76.83    1.99
  -2   2  -3   78.00    2.05
  -2   2  -3   75.29    2.10
  -2   2  -3   80.55    2.10
   2  -2   3   73.71    1.93
   2  -2   3   73.38    2.06
   2  -2   3   77.36    2.08
   2  -2   3   77.51    1.95
   2  -2   3   78.58    1.99
  -3   2  -3    1.44    0.19
  -3   2  -3    1.96    0.14
  -3   2  -3    1.58    0.18
  -3   2  -3    2.15    0.26
  -3   2  -3    1.81    0.17
   3  -2   3    1.84    0.15
   3  -2   3    1.63    0.12
   3  -2   3    1.76    0.19
  -4   2  -3   17.72    0.58
  -4   2  -3   18.54    0.68
  -4   2  -3   17.95    0.61
  -4   2  -3   17.73    0.50
   4  -2   3   18.02    0.58
   4  -2   3   17.71    0.48
  -5   2  -3   -0.14    0.11
  -5   2  -3   -0.25    0.14
  -5   2  -3    0.16    0.11
   5  -2   3    0.06    0.11
   5  -2   3    0.02    0.11
   5  -2   3    0.00    0.15
  -6   2  -3    1.87    0.23
  -6   2  -3    2.07    0.26
  -6   2  -3    1.88    0.23
   6  -2   3    1.78    0.28
   6  -2   3    1.48    0.20
  -7   2  -3   18.26    0.70
  -7   2  -3   20.04    0.68
  -7   2  -3   20.43    0.79
   7  -2   3   20.66    0.73
   7  -2   3   20.17    0.66
   7  -2   3   21.08    0.87
  -8   2  -3    5.11    0.33
  -8   2  -3    4.87    0.39
  -8   2  -3    5.20    0.42
   8  -2   3    4.88    0.31
   8  -2   3    5.18    0.39
  -9   2  -3    0.60    0.20
  -9   2  -3    0.65    0.23
  -9   2  -3    0.55    0.24
   9  -2   3    0.86    0.23
   9  -2   3    0.71    0.32
 -10   2  -3    0.25    0.24
 -10   2  -3    0.40    0.28
 -10   2  -3    0.58    0.20
  10  -2   3    0.03    0.33
  10  -2   3    0.38    0.19
  10  -2   3    0.45    0.24
 -11   2  -3    4.72    0.52
 -11   2  -3    5.24    0.43
  11  -2   3    4.74    0.57
  11  -2   3    5.76    0.52
 -12   2  -3    0.38    0.31
 -12   2  -3    0.21    0.23
  12  -2   3    0.37    0.36
  12  -2   3    0.03    0.34
 -13   2  -3   -0.03    0.35
 -13   2  -3   -0.09    0.26
  13  -2   3    0.48    0.45
  13  -2   3   -0.33    0.38
 -14   2  -3    1.75    0.37
 -14   2  -3    1.29    0.46
  14  -2   3    2.11    0.51
  14  -2   3    1.79    0.57
 -15   2  -3   -0.04    0.51
  15  -2   3    0.35    0.58
  15  -2   3    0.67    0.52
 -16   2  -3   -0.01    0.38
 -16   2  -3    0.07    0.56
  16  -2   3    0.53    0.54
  16  -2   3    0.54    0.66
 -17   2  -3    0.28    0.66
 -17   2  -3    0.49    0.42
  17  -2   3    1.12    0.66
  17  -2   3    0.78    0.79
 -18   2  -3   -0.53    0.70
 -18   2  -3    0.49    0.53
  18  -2   3    0.76    0.81
  18  -2   3    0.17    0.86
  20   1  -3   -0.88    0.76
 -20  -1   3    0.01    0.37
 -20  -1   3    0.49    0.65
  19   1  -3    1.35    0.71
  19   1  -3    1.46    0.62
  19   1  -3    2.43    0.62
 -19  -1   3    1.53    0.42
 -19  -1   3    1.94    0.57
  18   1  -3    1.71    0.58
  18   1  -3    1.49    0.54
  18   1  -3    1.59    0.55
 -18  -1   3    2.02    0.36
 -18  -1   3    2.07    0.52
  17   1  -3    1.20    0.49
  17   1  -3    1.52    0.51
  17   1  -3    1.04    0.46
 -17  -1   3    2.19    0.49
 -17  -1   3    1.47    0.32
  16   1  -3    0.04    0.46
  16   1  -3    0.67    0.40
  16   1  -3    0.53    0.45
  16   1  -3    0.53    0.40
 -16  -1   3    0.42    0.25
 -16  -1   3    0.78    0.36
  15   1  -3    4.23    0.50
  15   1  -3    4.38    0.59
  15   1  -3    6.18    0.68
  15   1  -3    4.98    0.52
 -15  -1   3    4.83    0.57
 -15  -1   3    4.65    0.40
 -15  -1   3    5.68    0.49
  14   1  -3    0.09    0.31
  14   1  -3    0.17    0.33
  14   1  -3    0.65    0.31
  14   1  -3   -0.92    0.35
  14   1  -3    0.24    0.29
 -14  -1   3    0.50    0.25
 -14  -1   3    0.41    0.29
 -14  -1   3    0.14    0.19
  13   1  -3    0.49    0.29
  13   1  -3    0.52    0.26
  13   1  -3    0.03    0.26
  13   1  -3    0.55    0.33
  13   1  -3    0.79    0.33
 -13  -1   3    0.52    0.20
 -13  -1   3    0.02    0.22
 -13  -1   3    0.29    0.26
  12   1  -3    0.22    0.22
  12   1  -3   -0.03    0.21
  12   1  -3    0.13    0.25
  12   1  -3    0.07    0.27
  12   1  -3    0.10    0.22
 -12  -1   3   -0.03    0.21
 -12  -1   3   -0.22    0.19
 -12  -1   3   -0.07    0.16
  11   1  -3    2.62    0.31
  11   1  -3    2.80    0.32
  11   1  -3    2.39    0.34
  11   1  -3    2.53    0.32
  11   1  -3    2.78    0.34
 -11  -1   3    2.04    0.28
 -11  -1   3    2.52    0.27
 -11  -1   3    2.72    0.29
  10   1  -3    0.03    0.17
  10   1  -3   -0.12    0.17
  10   1  -3    0.05    0.20
  10   1  -3   -0.01    0.17
  10   1  -3    0.33    0.16
 -10  -1   3   -0.27    0.13
 -10  -1   3   -0.11    0.14
 -10  -1   3    0.14    0.15
   9   1  -3   20.73    0.72
   9   1  -3   19.62    0.69
   9   1  -3   20.45    0.73
   9   1  -3   20.96    0.76
  -9  -1   3   20.49    0.68
  -9  -1   3   21.61    0.74
  -9  -1   3   20.60    0.70
   8   1  -3    0.07    0.11
   8   1  -3    0.33    0.15
   8   1  -3    0.21    0.14
   8   1  -3    0.19    0.16
  -8  -1   3    0.22    0.11
  -8  -1   3    0.15    0.14
  -8  -1   3    0.34    0.13
   7   1  -3   29.95    0.93
   7   1  -3   30.44    0.87
   7   1  -3   29.40    0.92
   7   1  -3   31.07    0.86
  -7  -1   3   30.71    0.90
  -7  -1   3   29.60    0.93
  -7  -1   3   29.86    0.90
  -7  -1   3   31.26    0.93
   6   1  -3    5.85    0.30
   6   1  -3    6.37    0.30
   6   1  -3    5.80    0.26
   6   1  -3    5.75    0.25
   6   1  -3    5.72    0.29
  -6  -1   3    5.82    0.30
  -6  -1   3    5.49    0.27
  -6  -1   3    5.44    0.28
   5   1  -3  117.97    3.14
   5   1  -3  128.17    3.11
   5   1  -3  122.30    3.06
  -5  -1   3  116.34    3.04
  -5  -1   3  115.77    2.96
  -5  -1   3  122.66    3.00
  -5  -1   3  115.70    3.02
  -5  -1   3  122.38    3.03
   4   1  -3    0.47    0.10
   4   1  -3    0.36    0.06
   4   1  -3    0.40    0.08
  -4  -1   3    0.41    0.09
  -4  -1   3    0.30    0.08
  -4  -1   3    0.50    0.08
  -4  -1   3    0.41    0.06
  -4  -1   3    0.51    0.10
   3   1  -3   69.72    1.93
   3   1  -3   75.90    1.93
   3   1  -3   76.03    1.86
   3   1  -3   75.49    1.89
  -3  -1   3   73.04    1.93
  -3  -1   3   75.09    1.94
  -3  -1   3   75.56    1.87
  -3  -1   3   72.89    1.95
  -3  -1   3   75.52    1.91
  -3  -1   3   77.68    1.91
   2   1  -3   17.09    0.50
   2   1  -3   16.45    0.53
   2   1  -3   15.63    0.49
   2   1  -3   16.93    0.46
   2   1  -3   17.04    0.45
  -2  -1   3   15.04    0.45
  -2  -1   3   16.94    0.49
  -2  -1   3   17.24    0.45
   1   1  -3    0.07    0.05
   1   1  -3    0.05    0.07
   1   1  -3    0.05    0.05
   1   1  -3    0.09    0.05
  -1  -1   3    0.06    0.05
  -1  -1   3    0.08    0.06
  -1  -1   3    0.05    0.02
  -1  -1   3    0.11    0.07
  -1  -1   3    0.01    0.04
   0   1  -3  224.67    5.57
   0   1  -3  225.76    5.52
   0   1  -3  221.53    5.57
   0   1  -3  229.34    5.59
   0  -1   3  231.88    5.67
   0  -1   3  236.35    5.60
   0  -1   3  225.65    5.64
   0  -1   3  220.90    5.65
  -1   1  -3   29.94    0.82
  -1   1  -3   29.82    0.85
  -1   1  -3   29.34    0.79
  -1   1  -3   31.24    0.87
  -1   1  -3   29.78    0.78
   1  -1   3   31.68    0.83
   1  -1   3   29.71    0.86
   1  -1   3   29.62    0.79
   1  -1   3   31.29    0.80
   1  -1   3   31.01    0.88
  -2   1  -3  115.32    2.80
  -2   1  -3  110.38    2.77
  -2   1  -3  113.19    2.88
  -2   1  -3  109.19    2.85
  -2   1  -3  111.69    2.79
   2  -1   3  115.05    2.82
   2  -1   3  114.47    2.85
   2  -1   3  116.64    2.90
   2  -1   3  110.71    2.93
   2  -1   3  113.97    2.84
  -3   1  -3  289.35    7.09
  -3   1  -3  277.51    6.99
   3  -1   3  282.57    7.00
   3  -1   3  280.21    7.05
   3  -1   3  288.98    6.98
   3  -1   3  286.21    7.13
   3  -1   3  290.01    7.07
  -4   1  -3    7.02    0.33
  -4   1  -3    6.89    0.29
  -4   1  -3    6.72    0.35
  -4   1  -3    6.99    0.28
   4  -1   3    6.62    0.37
   4  -1   3    6.59    0.30
   4  -1   3    6.47    0.30
   4  -1   3    6.41    0.27
  -5   1  -3    8.88    0.34
  -5   1  -3    8.79    0.44
  -5   1  -3    9.55    0.41
  -5   1  -3    9.28    0.38
   5  -1   3    9.46    0.46
   5  -1   3    9.14    0.34
   5  -1   3    9.08    0.38
  -6   1  -3    0.20    0.13
  -6   1  -3   -0.03    0.16
  -6   1  -3    0.35    0.14
  -6   1  -3    0.18    0.10
   6  -1   3    0.19    0.09
   6  -1   3    0.20    0.16
   6  -1   3    0.05    0.12
   6  -1   3    0.06    0.11
  -7   1  -3   55.58    1.65
  -7   1  -3   55.28    1.57
  -7   1  -3   53.74    1.48
  -7   1  -3   53.61    1.55
   7  -1   3   54.00    1.55
   7  -1   3   53.86    1.63
  -8   1  -3   20.15    0.75
  -8   1  -3   19.24    0.65
  -8   1  -3   19.29    0.74
   8  -1   3   20.35    0.76
   8  -1   3   20.79    0.84
   8  -1   3   19.72    0.67
  -9   1  -3    6.26    0.42
  -9   1  -3    6.95    0.36
  -9   1  -3    6.47    0.47
   9  -1   3    6.42    0.38
   9  -1   3    5.97    0.48
   9  -1   3    6.68    0.45
 -10   1  -3    0.72    0.19
 -10   1  -3    0.78    0.26
  10  -1   3    0.75    0.29
  10  -1   3    0.65    0.24
  10  -1   3    0.35    0.20
 -11   1  -3    0.15    0.26
 -11   1  -3    0.14    0.19
  11  -1   3    0.02    0.22
  11  -1   3    0.09    0.29
  11  -1   3   -0.45    0.28
 -12   1  -3    0.04    0.27
 -12   1  -3    0.44    0.22
  12  -1   3    0.25    0.35
  12  -1   3    0.11    0.31
 -13   1  -3    2.07    0.29
 -13   1  -3    2.36    0.38
  13  -1   3    1.37    0.36
  13  -1   3    1.88    0.47
 -14   1  -3    1.40    0.39
 -14   1  -3    1.16    0.29
  14  -1   3    1.84    0.49
 -15   1  -3    0.81    0.32
 -15   1  -3    0.80    0.43
  15  -1   3    1.19    0.53
  15  -1   3    0.69    0.50
 -16   1  -3    0.37    0.34
 -16   1  -3    0.38    0.45
  16  -1   3    0.84    0.54
  16  -1   3   -0.05    0.56
 -17   1  -3    1.08    0.57
 -17   1  -3    0.84    0.41
  17  -1   3   -0.02    0.63
  17  -1   3    0.82    0.67
 -18   1  -3   -0.63    0.42
 -18   1  -3   -0.20    0.58
  18  -1   3   -0.12    0.74
  18  -1   3   -0.10    0.72
  20   0  -3    0.73    0.79
  20   0  -3    0.46    0.74
 -20   0   3   -0.60    0.61
  19   0  -3    4.51    0.74
  19   0  -3    4.28    0.70
 -19   0   3    4.39    0.45
 -19   0   3    3.80    0.68
  18   0  -3   -0.57    0.42
  18   0  -3    0.12    0.61
  18   0  -3    0.83    0.56
 -18   0   3   -0.39    0.28
 -18   0   3   -0.90    0.44
  17   0  -3    3.85    0.47
  17   0  -3    4.77    0.64
  17   0  -3    4.38    0.67
 -17   0   3    4.42    0.58
 -17   0   3    4.57    0.44
  16   0  -3   -0.62    0.41
  16   0  -3   -0.12    0.43
  16   0  -3   -0.30    0.33
  16   0  -3    0.52    0.42
 -16   0   3   -0.09    0.23
 -16   0   3   -0.30    0.20
 -16   0   3   -0.28    0.35
  15   0  -3    0.36    0.39
  15   0  -3    0.76    0.32
  15   0  -3    0.46    0.35
 -15   0   3    0.30    0.31
 -15   0   3    0.72    0.22
 -15   0   3    0.41    0.19
  14   0  -3    0.14    0.34
  14   0  -3    0.13    0.31
  14   0  -3    0.11    0.35
  14   0  -3   -0.05    0.26
 -14   0   3    0.19    0.18
 -14   0   3   -0.06    0.25
 -14   0   3    0.16    0.16
  13   0  -3    0.51    0.31
  13   0  -3    0.19    0.28
  13   0  -3    0.20    0.27
  13   0  -3    0.26    0.21
  13   0  -3   -0.45    0.22
 -13   0   3    0.09    0.16
 -13   0   3    0.30    0.15
 -13   0   3   -0.20    0.20
  12   0  -3    0.08    0.23
  12   0  -3    0.04    0.18
  12   0  -3    0.30    0.26
  12   0  -3    0.09    0.24
  12   0  -3   -0.19    0.18
 -12   0   3    0.10    0.12
 -12   0   3    0.31    0.15
 -12   0   3    0.06    0.21
  11   0  -3   11.43    0.61
  11   0  -3   11.32    0.49
  11   0  -3   11.17    0.50
  11   0  -3   11.94    0.58
  11   0  -3   12.18    0.58
 -11   0   3   11.24    0.42
 -11   0   3   11.42    0.44
 -11   0   3   12.02    0.56
  10   0  -3   -0.05    0.13
  10   0  -3    0.25    0.18
  10   0  -3   -0.16    0.12
  10   0  -3   -0.06    0.18
  10   0  -3    0.19    0.19
 -10   0   3   -0.02    0.11
 -10   0   3   -0.06    0.09
 -10   0   3    0.22    0.16
   9   0  -3    0.79    0.19
   9   0  -3    0.37    0.19
   9   0  -3    0.64    0.18
   9   0  -3    0.63    0.15
  -9   0   3    0.62    0.17
  -9   0   3    0.58    0.10
  -9   0   3    0.63    0.12
   8   0  -3    0.03    0.10
   8   0  -3   -0.13    0.13
   8   0  -3   -0.27    0.13
   8   0  -3   -0.19    0.14
   8   0  -3    0.09    0.09
  -8   0   3    0.03    0.11
  -8   0   3   -0.10    0.08
   7   0  -3   87.09    2.38
   7   0  -3   91.04    2.28
   7   0  -3   90.69    2.39
  -7   0   3   89.98    2.41
  -7   0   3   90.13    2.31
  -7   0   3   91.26    2.27
   6   0  -3    0.12    0.10
   6   0  -3   -0.07    0.08
   6   0  -3   -0.16    0.06
   6   0  -3    0.06    0.07
  -6   0   3   -0.02    0.04
  -6   0   3    0.04    0.06
  -6   0   3   -0.01    0.07
  -6   0   3    0.10    0.10
   5   0  -3    4.79    0.23
   5   0  -3    4.36    0.18
   5   0  -3    4.31    0.19
   5   0  -3    4.90    0.23
  -5   0   3    4.39    0.16
  -5   0   3    4.49    0.23
  -5   0   3    4.26    0.24
  -5   0   3    4.76    0.19
   4   0  -3   -0.04    0.06
   4   0  -3   -0.03    0.04
   4   0  -3    0.01    0.04
   4   0  -3   -0.03    0.05
   4   0  -3    0.00    0.07
  -4   0   3    0.01    0.05
  -4   0   3    0.03    0.06
  -4   0   3   -0.01    0.07
  -4   0   3    0.02    0.05
  -4   0   3    0.01    0.03
   3   0  -3   43.76    1.19
   3   0  -3   46.91    1.21
   3   0  -3   46.40    1.21
  -3   0   3   46.55    1.14
  -3   0   3   46.33    1.20
  -3   0   3   46.78    1.15
  -3   0   3   45.67    1.19
  -3   0   3   44.07    1.21
   2   0  -3   -0.18    0.04
   2   0  -3   -0.13    0.03
   2   0  -3   -0.11    0.04
   2   0  -3   -0.16    0.03
  -2   0   3   -0.09    0.02
  -2   0   3   -0.09    0.03
  -2   0   3   -0.19    0.04
  -2   0   3   -0.08    0.05
  -2   0   3   -0.11    0.03
   0   0  -3   -0.30    0.02
   0   0   3   -0.26    0.04
  -1   0  -3   12.98    0.39
  -1   0  -3   14.17    0.39
  -1   0  -3   13.61    0.41
  -1   0  -3   14.06    0.42
   1   0   3   12.92    0.41
   1   0   3   13.80    0.37
   1   0   3   13.31    0.39
  -2   0  -3    0.04    0.04
  -2   0  -3    0.00    0.04
  -2   0  -3    0.04    0.06
  -2   0  -3   -0.02    0.04
  -2   0  -3    0.00    0.04
  -2   0  -3    0.14    0.06
   2   0   3   -0.03    0.04
   2   0   3    0.01    0.04
   2   0   3   -0.06    0.05
   2   0   3    0.03    0.05
   2   0   3    0.00    0.06
  -3   0  -3  122.25    3.01
  -3   0  -3  123.16    3.06
  -3   0  -3  119.99    3.04
  -3   0  -3  121.42    3.00
  -3   0  -3  114.38    2.98
  -3   0  -3  118.69    3.01
   3   0   3  123.28    3.04
   3   0   3  117.40    3.03
   3   0   3  116.53    2.98
   3   0   3  119.72    2.97
  -4   0  -3    0.08    0.06
  -4   0  -3   -0.07    0.06
  -4   0  -3   -0.02    0.07
  -4   0  -3   -0.01    0.06
  -4   0  -3    0.00    0.09
   4   0   3   -0.05    0.06
   4   0   3   -0.09    0.06
   4   0   3    0.10    0.09
   4   0   3   -0.02    0.07
  -5   0  -3   17.57    0.54
  -5   0  -3   17.43    0.52
  -5   0  -3   17.25    0.56
   5   0   3   17.93    0.56
   5   0   3   17.72    0.52
   5   0   3   16.16    0.60
   5   0   3   17.57    0.60
  -6   0  -3   -0.03    0.09
  -6   0  -3   -0.10    0.10
  -6   0  -3    0.15    0.14
  -6   0  -3    0.02    0.08
  -6   0  -3   -0.07    0.14
   6   0   3   -0.07    0.09
   6   0   3    0.15    0.11
   6   0   3    0.07    0.09
   6   0   3   -0.05    0.14
   6   0   3   -0.16    0.09
  -7   0  -3   60.94    1.59
  -7   0  -3   58.18    1.66
  -7   0  -3   60.45    1.73
  -7   0  -3   61.35    1.61
   7   0   3   57.29    1.63
   7   0   3   56.93    1.56
   7   0   3   56.40    1.62
   7   0   3   55.04    1.50
  -8   0  -3    0.15    0.14
  -8   0  -3   -0.17    0.10
  -8   0  -3    0.26    0.20
  -8   0  -3    0.09    0.11
   8   0   3   -0.14    0.18
   8   0   3    0.14    0.14
   8   0   3   -0.13    0.15
   8   0   3    0.04    0.15
   8   0   3    0.01    0.11
  -9   0  -3   33.61    1.05
  -9   0  -3   31.22    0.92
  -9   0  -3   32.89    0.98
   9   0   3   31.73    1.02
   9   0   3   31.69    1.02
   9   0   3   32.92    1.10
   9   0   3   33.15    1.11
 -10   0  -3    0.13    0.15
 -10   0  -3    0.05    0.19
 -10   0  -3    0.15    0.13
 -10   0  -3   -0.43    0.25
  10   0   3    0.05    0.17
  10   0   3   -0.26    0.26
  10   0   3    0.15    0.23
 -11   0  -3    2.35    0.28
 -11   0  -3    2.65    0.42
 -11   0  -3    1.77    0.30
  11   0   3    2.31    0.25
  11   0   3    2.82    0.34
  11   0   3    1.68    0.33
  11   0   3    1.63    0.34
 -12   0  -3   -0.11    0.17
 -12   0  -3   -0.43    0.22
 -12   0  -3    0.05    0.17
  12   0   3    0.21    0.33
  12   0   3    0.32    0.31
  12   0   3    0.28    0.21
  12   0   3   -0.17    0.29
 -13   0  -3    2.55    0.42
 -13   0  -3    2.77    0.35
 -13   0  -3    2.82    0.30
  13   0   3    2.54    0.43
  13   0   3    3.08    0.50
  13   0   3    3.78    0.38
 -14   0  -3   -0.01    0.21
 -14   0  -3    0.31    0.20
 -14   0  -3   -0.06    0.28
  14   0   3    0.23    0.26
  14   0   3    0.45    0.40
  14   0   3   -0.39    0.38
 -15   0  -3    0.28    0.30
 -15   0  -3    0.40    0.39
  15   0   3    0.48    0.45
  15   0   3    0.41    0.46
 -16   0  -3    0.24    0.28
 -16   0  -3   -0.78    0.40
  16   0   3    0.07    0.56
  16   0   3    0.58    0.51
 -17   0  -3    1.34    0.39
 -17   0  -3    2.05    0.56
  17   0   3    1.04    0.60
  17   0   3    1.61    0.63
 -18   0  -3    0.55    0.60
 -18   0  -3    0.10    0.40
  18   0   3   -0.08    0.68
  18   0   3    0.03    0.71
  20  -1  -3   -0.40    0.81
  20  -1  -3    0.35    0.74
 -20   1   3   -0.44    0.59
  19  -1  -3    1.48    0.66
  19  -1  -3    1.98    0.74
 -19   1   3    1.76    0.60
  18  -1  -3    1.58    0.60
  18  -1  -3    1.58    0.64
 -18   1   3    1.66    0.48
 -18   1   3    1.97    0.37
  17  -1  -3    1.19    0.33
  17  -1  -3    1.62    0.56
  17  -1  -3    0.65    0.59
 -17   1   3    1.13    0.30
 -17   1   3    1.43    0.51
  16  -1  -3    0.47    0.37
  16  -1  -3    0.73    0.44
  16  -1  -3    0.59    0.29
 -16   1   3    0.42    0.38
 -16   1   3    0.49    0.23
  15  -1  -3    5.78    0.46
  15  -1  -3    5.56    0.61
  15  -1  -3    4.91    0.63
 -15   1   3    5.13    0.34
 -15   1   3    4.66    0.53
 -15   1   3    4.58    0.40
  14  -1  -3    0.00    0.21
  14  -1  -3   -0.29    0.26
  14  -1  -3    0.15    0.31
  14  -1  -3   -0.52    0.36
 -14   1   3    0.05    0.17
 -14   1   3   -0.36    0.29
 -14   1   3   -0.11    0.16
  13  -1  -3    0.59    0.23
  13  -1  -3    0.90    0.19
  13  -1  -3    0.71    0.31
  13  -1  -3    0.51    0.37
 -13   1   3    0.39    0.16
 -13   1   3    0.32    0.14
 -13   1   3    0.72    0.28
  12  -1  -3    0.19    0.29
  12  -1  -3   -0.03    0.16
  12  -1  -3   -0.03    0.23
  12  -1  -3    0.30    0.17
 -12   1   3    0.06    0.12
 -12   1   3    0.01    0.21
  11  -1  -3    2.59    0.40
  11  -1  -3    2.71    0.25
  11  -1  -3    2.56    0.39
  11  -1  -3    2.54    0.33
 -11   1   3    2.38    0.21
 -11   1   3    2.45    0.20
 -11   1   3    2.38    0.29
  10  -1  -3    0.20    0.12
  10  -1  -3   -0.12    0.20
  10  -1  -3   -0.20    0.17
 -10   1   3    0.06    0.10
 -10   1   3   -0.11    0.09
 -10   1   3   -0.13    0.15
   9  -1  -3   20.75    0.78
   9  -1  -3   20.51    0.62
   9  -1  -3   21.39    0.83
   9  -1  -3   20.86    0.63
   9  -1  -3   20.61    0.76
  -9   1   3   20.17    0.73
  -9   1   3   19.87    0.59
   8  -1  -3   -0.01    0.18
   8  -1  -3    0.25    0.08
   8  -1  -3    0.28    0.16
   8  -1  -3    0.14    0.08
  -8   1   3    0.22    0.08
  -8   1   3    0.27    0.07
  -8   1   3   -0.04    0.12
   7  -1  -3   30.03    0.96
   7  -1  -3   30.34    0.95
   7  -1  -3   29.54    0.80
   7  -1  -3   30.37    0.82
   7  -1  -3   30.07    0.92
   7  -1  -3   31.19    1.01
  -7   1   3   30.64    0.80
  -7   1   3   30.16    0.83
  -7   1   3   29.81    0.92
   6  -1  -3    6.01    0.20
   6  -1  -3    5.88    0.22
   6  -1  -3    5.96    0.28
   6  -1  -3    5.65    0.37
   6  -1  -3    5.74    0.31
  -6   1   3    5.73    0.29
  -6   1   3    6.04    0.21
  -6   1   3    5.88    0.23
   5  -1  -3  121.33    3.12
   5  -1  -3  121.06    3.04
   5  -1  -3  121.80    2.97
  -5   1   3  120.24    3.07
  -5   1   3  121.23    3.00
  -5   1   3  125.07    3.16
  -5   1   3  122.21    3.11
   4  -1  -3    0.35    0.04
   4  -1  -3    0.41    0.11
   4  -1  -3    0.26    0.07
   4  -1  -3    0.47    0.07
  -4   1   3    0.34    0.07
  -4   1   3    0.42    0.05
  -4   1   3    0.40    0.08
  -4   1   3    0.36    0.11
   3  -1  -3   77.64    1.87
   3  -1  -3   75.18    1.97
   3  -1  -3   73.23    1.97
   3  -1  -3   74.47    1.93
   3  -1  -3   77.39    1.92
  -3   1   3   77.00    1.88
  -3   1   3   74.64    1.93
  -3   1   3   76.46    1.95
  -3   1   3   74.32    1.98
  -3   1   3   76.32    1.98
   2  -1  -3   16.91    0.48
   2  -1  -3   17.19    0.52
   2  -1  -3   16.72    0.46
   2  -1  -3   17.76    0.54
   2  -1  -3   15.46    0.47
   2  -1  -3   16.92    0.52
   2  -1  -3   17.16    0.50
  -2   1   3   17.62    0.53
  -2   1   3   17.31    0.48
  -2   1   3   16.47    0.51
  -2   1   3   16.61    0.52
   1  -1  -3    0.05    0.05
   1  -1  -3   -0.01    0.04
   1  -1  -3    0.03    0.04
   1  -1  -3    0.04    0.07
   1  -1  -3    0.12    0.06
  -1   1   3    0.11    0.06
  -1   1   3    0.04    0.04
  -1   1   3    0.01    0.06
  -1   1   3    0.10    0.05
  -1   1   3    0.12    0.07
   0  -1  -3  228.31    5.77
   0  -1  -3  235.65    5.70
   0  -1  -3  237.40    5.76
   0  -1  -3  227.20    5.65
   0  -1  -3  226.09    5.66
   0  -1  -3  233.25    5.74
   0   1   3  234.79    5.75
   0   1   3  234.10    5.68
   0   1   3  226.09    5.71
  -1  -1  -3   31.15    0.86
  -1  -1  -3   31.16    0.85
  -1  -1  -3   30.89    0.83
  -1  -1  -3   28.46    0.78
  -1  -1  -3   29.99    0.86
   1   1   3   30.60    0.79
   1   1   3   30.91    0.86
   1   1   3   30.48    0.86
   1   1   3   29.00    0.82
   1   1   3   29.22    0.84
  -2  -1  -3  112.68    2.94
  -2  -1  -3  114.45    2.93
  -2  -1  -3  115.53    2.88
  -2  -1  -3  116.74    2.85
   2   1   3  112.08    2.88
   2   1   3  108.68    2.87
   2   1   3  113.47    2.84
   2   1   3  113.68    2.82
   2   1   3  113.52    2.79
  -3  -1  -3  282.85    7.00
  -3  -1  -3  287.93    6.98
  -3  -1  -3  268.91    6.96
  -3  -1  -3  295.97    7.08
   3   1   3  274.99    6.92
   3   1   3  276.53    6.94
   3   1   3  284.48    6.86
   3   1   3  275.52    6.84
   3   1   3  277.34    6.82
  -4  -1  -3    7.08    0.34
  -4  -1  -3    6.88    0.32
  -4  -1  -3    7.19    0.30
  -4  -1  -3    6.63    0.31
  -4  -1  -3    6.88    0.27
   4   1   3    6.75    0.28
   4   1   3    6.75    0.31
   4   1   3    7.12    0.35
   4   1   3    6.86    0.27
  -5  -1  -3    8.98    0.35
  -5  -1  -3    9.53    0.39
  -5  -1  -3    9.78    0.39
   5   1   3    9.20    0.43
   5   1   3    8.83    0.39
   5   1   3    9.45    0.40
   5   1   3    9.32    0.37
   5   1   3    8.98    0.35
  -6  -1  -3    0.05    0.13
  -6  -1  -3    0.13    0.10
  -6  -1  -3    0.26    0.12
  -6  -1  -3    0.27    0.13
   6   1   3    0.05    0.14
   6   1   3    0.13    0.14
   6   1   3    0.13    0.12
   6   1   3    0.18    0.11
  -7  -1  -3   54.56    1.56
  -7  -1  -3   54.49    1.54
  -7  -1  -3   55.91    1.56
  -7  -1  -3   57.56    1.54
   7   1   3   54.36    1.53
   7   1   3   56.01    1.55
   7   1   3   54.64    1.55
   7   1   3   56.54    1.63
  -8  -1  -3   19.49    0.68
  -8  -1  -3   19.84    0.69
  -8  -1  -3   19.64    0.74
  -8  -1  -3   20.03    0.69
   8   1   3   18.84    0.69
   8   1   3   19.65    0.70
   8   1   3   19.94    0.69
   8   1   3   19.79    0.78
  -9  -1  -3    6.50    0.38
  -9  -1  -3    6.93    0.37
  -9  -1  -3    6.39    0.39
  -9  -1  -3    6.60    0.45
   9   1   3    6.60    0.47
   9   1   3    5.94    0.40
   9   1   3    6.25    0.40
   9   1   3    5.96    0.46
   9   1   3    5.71    0.39
 -10  -1  -3    0.30    0.26
 -10  -1  -3    0.76    0.22
 -10  -1  -3    0.65    0.22
 -10  -1  -3    0.77    0.19
  10   1   3    0.73    0.21
  10   1   3    0.43    0.22
  10   1   3    0.19    0.22
  10   1   3    0.86    0.29
 -11  -1  -3    0.06    0.19
 -11  -1  -3    0.33    0.22
 -11  -1  -3   -0.17    0.20
 -11  -1  -3    0.49    0.29
  11   1   3   -0.08    0.22
  11   1   3    0.01    0.24
  11   1   3   -0.13    0.28
  11   1   3    0.19    0.22
 -12  -1  -3    0.16    0.20
 -12  -1  -3   -0.25    0.23
 -12  -1  -3    0.39    0.38
 -12  -1  -3    0.19    0.25
  12   1   3    0.11    0.33
  12   1   3    0.04    0.24
  12   1   3   -0.21    0.26
 -13  -1  -3    1.68    0.32
 -13  -1  -3    1.84    0.34
 -13  -1  -3    2.30    0.51
 -13  -1  -3    2.43    0.33
  13   1   3    1.92    0.35
  13   1   3    2.23    0.39
 -14  -1  -3    0.84    0.33
 -14  -1  -3    1.77    0.32
 -14  -1  -3    1.40    0.40
 -14  -1  -3    2.15    0.58
  14   1   3    2.17    0.39
  14   1   3    1.54    0.38
  14   1   3    1.58    0.46
 -15  -1  -3    0.52    0.37
 -15  -1  -3    1.39    0.34
  15   1   3    1.13    0.39
  15   1   3    0.61    0.51
  15   1   3    0.17    0.41
 -16  -1  -3    0.76    0.44
 -16  -1  -3    0.68    0.31
  16   1   3    0.71    0.49
  16   1   3    0.87    0.44
  16   1   3    0.95    0.52
 -17  -1  -3   -0.11    0.52
 -17  -1  -3    1.16    0.38
  17   1   3    0.60    0.63
 -18  -1  -3   -0.15    0.58
 -18  -1  -3   -0.47    0.38
  18   1   3    0.53    0.77
  18   1   3   -0.95    0.59
  19  -2  -3    1.32    0.73
  19  -2  -3    0.84    0.83
 -19   2   3   -0.13    0.61
  18  -2  -3    1.28    0.73
  18  -2  -3    1.47    0.66
 -18   2   3    1.74    0.53
 -18   2   3    0.89    0.38
  17  -2  -3    0.26    0.51
  17  -2  -3    0.48    0.61
 -17   2   3    0.24    0.45
 -17   2   3   -0.09    0.30
  16  -2  -3    0.70    0.38
  16  -2  -3    0.92    0.48
  16  -2  -3    0.85    0.56
 -16   2   3    0.81    0.41
 -16   2   3    0.49    0.28
  15  -2  -3    2.63    0.49
  15  -2  -3    2.44    0.55
  15  -2  -3    2.06    0.21
 -15   2   3    2.81    0.33
 -15   2   3    3.16    0.52
  14  -2  -3    2.40    0.30
  14  -2  -3    1.98    0.19
  14  -2  -3    1.84    0.51
  14  -2  -3    1.97    0.45
 -14   2   3    2.64    0.42
 -14   2   3    2.12    0.26
 -14   2   3    2.09    0.28
  13  -2  -3    0.35    0.41
  13  -2  -3    0.13    0.15
  13  -2  -3   -0.01    0.28
  13  -2  -3    0.13    0.19
 -13   2   3    0.56    0.30
 -13   2   3    0.18    0.19
 -13   2   3    0.27    0.15
  12  -2  -3    2.17    0.21
  12  -2  -3    1.68    0.39
  12  -2  -3    1.91    0.23
  12  -2  -3    1.67    0.35
 -12   2   3    2.15    0.23
 -12   2   3    2.37    0.37
 -12   2   3    1.85    0.22
  11  -2  -3    0.44    0.27
  11  -2  -3    0.68    0.33
  11  -2  -3    0.63    0.15
  11  -2  -3    0.62    0.13
 -11   2   3    0.85    0.16
 -11   2   3    0.73    0.17
 -11   2   3    0.82    0.25
  10  -2  -3    0.12    0.11
  10  -2  -3   -0.15    0.09
  10  -2  -3    0.19    0.28
  10  -2  -3   -0.16    0.20
 -10   2   3    0.11    0.20
 -10   2   3    0.14    0.13
 -10   2   3    0.17    0.11
   9  -2  -3    5.52    0.23
   9  -2  -3    6.36    0.48
   9  -2  -3    5.14    0.25
   9  -2  -3    4.53    0.35
   9  -2  -3    5.18    0.41
  -9   2   3    5.37    0.39
  -9   2   3    5.70    0.28
  -9   2   3    5.48    0.30
   8  -2  -3    4.45    0.20
   8  -2  -3    3.73    0.40
   8  -2  -3    4.71    0.22
   8  -2  -3    4.51    0.37
  -8   2   3    4.12    0.25
  -8   2   3    4.64    0.33
  -8   2   3    4.42    0.42
  -8   2   3    4.15    0.26
   7  -2  -3    3.41    0.19
   7  -2  -3    3.47    0.32
   7  -2  -3    3.73    0.29
   7  -2  -3    3.69    0.38
   7  -2  -3    3.51    0.19
  -7   2   3    3.46    0.30
  -7   2   3    3.47    0.23
   6  -2  -3   26.73    0.97
   6  -2  -3   27.81    0.91
   6  -2  -3   29.71    0.78
   6  -2  -3   29.09    0.88
   6  -2  -3   27.32    0.79
  -6   2   3   26.83    0.81
  -6   2   3   27.03    0.88
  -6   2   3   27.99    0.79
   5  -2  -3   33.87    0.92
   5  -2  -3   34.13    0.95
   5  -2  -3   33.87    0.96
   5  -2  -3   34.85    1.07
   5  -2  -3   33.71    1.00
   5  -2  -3   35.06    1.10
   5  -2  -3   33.59    1.04
  -5   2   3   34.73    1.04
  -5   2   3   34.55    1.07
  -5   2   3   34.97    0.97
  -5   2   3   34.89    1.09
  -5   2   3   35.28    1.00
   4  -2  -3   -0.06    0.13
   4  -2  -3    0.06    0.11
   4  -2  -3    0.01    0.09
   4  -2  -3    0.26    0.08
   4  -2  -3    0.08    0.14
   4  -2  -3   -0.03    0.11
   4  -2  -3    0.07    0.08
   4  -2  -3   -0.11    0.09
  -4   2   3   -0.02    0.10
  -4   2   3    0.01    0.11
  -4   2   3    0.12    0.13
  -4   2   3   -0.04    0.08
   3  -2  -3    5.21    0.29
   3  -2  -3    5.41    0.27
   3  -2  -3    4.97    0.30
   3  -2  -3    5.45    0.26
   3  -2  -3    5.44    0.25
  -3   2   3    5.28    0.25
  -3   2   3    5.06    0.27
   2  -2  -3   15.41    0.56
   2  -2  -3   16.39    0.52
   2  -2  -3   16.30    0.51
   2  -2  -3   15.38    0.53
   2  -2  -3   16.11    0.53
   2  -2  -3   16.32    0.55
  -2   2   3   16.45    0.53
  -2   2   3   16.22    0.56
   1  -2  -3   29.61    0.85
   1  -2  -3   30.03    0.89
   1  -2  -3   29.21    0.83
   1  -2  -3   28.86    0.90
   1  -2  -3   28.72    0.85
  -1   2   3   28.84    0.86
  -1   2   3   29.67    0.85
  -1   2   3   27.69    0.87
   0  -2  -3    0.07    0.08
   0  -2  -3   -0.02    0.08
   0  -2  -3    0.06    0.07
   0  -2  -3    0.04    0.11
   0  -2  -3   -0.07    0.10
   0  -2  -3    0.03    0.10
   0   2   3    0.06    0.10
   0   2   3    0.08    0.07
   0   2   3   -0.07    0.10
  -1  -2  -3    5.62    0.24
  -1  -2  -3    5.77    0.31
  -1  -2  -3    5.89    0.26
  -1  -2  -3    5.26    0.29
   1   2   3    5.79    0.25
   1   2   3    5.87    0.33
   1   2   3    5.73    0.26
   1   2   3    5.91    0.31
   1   2   3    6.06    0.33
  -2  -2  -3   77.56    1.98
  -2  -2  -3   78.91    2.08
  -2  -2  -3   74.79    2.06
  -2  -2  -3   77.95    2.00
   2   2   3   75.14    2.07
   2   2   3   76.80    2.07
   2   2   3   76.85    2.00
   2   2   3   77.75    1.97
  -3  -2  -3    1.41    0.15
  -3  -2  -3    1.43    0.19
  -3  -2  -3    1.91    0.22
  -3  -2  -3    1.62    0.14
   3   2   3    1.85    0.14
   3   2   3    2.18    0.18
   3   2   3    1.47    0.20
  -4  -2  -3   17.67    0.64
  -4  -2  -3   17.12    0.65
  -4  -2  -3   17.56    0.57
  -4  -2  -3   18.12    0.54
   4   2   3   16.67    0.52
   4   2   3   17.58    0.58
   4   2   3   17.42    0.65
   4   2   3   17.40    0.64
  -5  -2  -3   -0.05    0.10
  -5  -2  -3   -0.08    0.13
  -5  -2  -3    0.23    0.16
  -5  -2  -3    0.11    0.09
   5   2   3   -0.08    0.14
   5   2   3    0.00    0.15
   5   2   3    0.12    0.08
   5   2   3    0.01    0.12
  -6  -2  -3    1.98    0.21
  -6  -2  -3    1.56    0.24
  -6  -2  -3    1.93    0.24
  -6  -2  -3    1.89    0.21
   6   2   3    1.90    0.24
   6   2   3    2.10    0.26
   6   2   3    1.71    0.21
   6   2   3    1.86    0.17
  -7  -2  -3   18.76    0.75
  -7  -2  -3   19.81    0.74
  -7  -2  -3   20.61    0.69
  -7  -2  -3   20.24    0.78
  -7  -2  -3   20.62    0.67
   7   2   3   20.62    0.78
   7   2   3   19.19    0.70
   7   2   3   19.62    0.77
  -8  -2  -3    5.16    0.40
  -8  -2  -3    5.67    0.36
  -8  -2  -3    5.32    0.43
   8   2   3    5.29    0.47
   8   2   3    4.86    0.37
   8   2   3    4.99    0.30
   8   2   3    5.00    0.44
  -9  -2  -3    0.62    0.23
  -9  -2  -3    0.32    0.27
  -9  -2  -3    0.83    0.23
  -9  -2  -3    0.71    0.19
   9   2   3    0.68    0.17
   9   2   3    0.50    0.24
   9   2   3    0.42    0.25
   9   2   3    0.88    0.28
 -10  -2  -3    0.21    0.23
 -10  -2  -3    0.72    0.30
 -10  -2  -3    0.25    0.22
 -10  -2  -3   -0.53    0.22
  10   2   3    0.08    0.24
  10   2   3    0.66    0.28
  10   2   3    0.29    0.26
  10   2   3    0.68    0.18
 -11  -2  -3    5.18    0.44
 -11  -2  -3    5.56    0.51
 -11  -2  -3    5.34    0.44
 -11  -2  -3    5.21    0.54
  11   2   3    5.41    0.42
  11   2   3    5.91    0.58
  11   2   3    4.32    0.51
  11   2   3    4.61    0.51
 -12  -2  -3    0.34    0.29
 -12  -2  -3   -0.12    0.25
 -12  -2  -3    0.00    0.33
 -12  -2  -3   -0.03    0.34
  12   2   3    0.01    0.24
  12   2   3    0.01    0.32
 -13  -2  -3   -0.31    0.39
 -13  -2  -3   -0.15    0.30
  13   2   3   -0.17    0.28
  13   2   3   -0.52    0.31
  13   2   3    0.24    0.38
 -14  -2  -3    1.57    0.35
 -14  -2  -3    0.96    0.50
 -14  -2  -3    1.06    0.38
  14   2   3    0.74    0.40
  14   2   3    1.05    0.34
  14   2   3    1.61    0.46
 -15  -2  -3    0.21    0.33
 -15  -2  -3   -0.25    0.40
  15   2   3    0.01    0.50
  15   2   3    0.55    0.51
  15   2   3    0.54    0.36
 -16  -2  -3   -0.10    0.44
 -16  -2  -3   -0.01    0.36
  16   2   3    0.43    0.41
  16   2   3   -0.39    0.52
  16   2   3    1.37    0.64
 -17  -2  -3    0.36    0.55
 -17  -2  -3   -0.05    0.41
  17   2   3   -0.02    0.67
  17   2   3    0.62    0.60
 -18  -2  -3    0.56    0.49
 -18  -2  -3   -0.58    0.61
  18   2   3   -0.47    0.75
  18  -3  -3   -0.26    0.81
  18  -3  -3    1.50    0.71
 -18   3   3    0.77    0.63
  17  -3  -3    0.84    0.63
  17  -3  -3    0.12    0.71
 -17   3   3    0.25    0.42
 -17   3   3    0.60    0.59
  16  -3  -3    0.68    0.61
  16  -3  -3    0.19    0.49
 -16   3   3    0.49    0.35
 -16   3   3    0.48    0.52
  15  -3  -3    0.82    0.56
  15  -3  -3    2.18    0.55
 -15   3   3    1.80    0.36
 -15   3   3    1.61    0.47
  14  -3  -3    6.47    0.77
  14  -3  -3    6.60    0.76
 -14   3   3    6.88    0.69
 -14   3   3    7.22    0.54
  13  -3  -3    0.63    0.12
  13  -3  -3    0.35    0.22
  13  -3  -3    0.54    0.16
  13  -3  -3    0.21    0.37
  13  -3  -3    0.48    0.46
 -13   3   3    0.88    0.27
 -13   3   3    0.70    0.42
  12  -3  -3    0.10    0.18
  12  -3  -3    0.15    0.12
  12  -3  -3    0.44    0.42
  12  -3  -3    0.57    0.35
  12  -3  -3    0.27    0.16
 -12   3   3    0.32    0.23
 -12   3   3    0.42    0.34
  11  -3  -3    0.11    0.17
  11  -3  -3   -0.05    0.30
  11  -3  -3   -0.19    0.34
  11  -3  -3    0.13    0.16
  11  -3  -3    0.13    0.12
 -11   3   3   -0.02    0.19
 -11   3   3   -0.24    0.24
  10  -3  -3    2.26    0.26
  10  -3  -3    1.84    0.21
  10  -3  -3    1.93    0.43
  10  -3  -3    2.11    0.38
 -10   3   3    2.14    0.26
 -10   3   3    1.93    0.31
   9  -3  -3    0.85    0.35
   9  -3  -3    0.71    0.18
   9  -3  -3    0.79    0.27
   9  -3  -3    0.48    0.16
  -9   3   3    0.79    0.24
  -9   3   3    0.61    0.20
   8  -3  -3    6.28    0.53
   8  -3  -3    6.18    0.46
   8  -3  -3    5.96    0.30
   8  -3  -3    6.05    0.31
  -8   3   3    5.60    0.36
  -8   3   3    4.98    0.48
  -8   3   3    5.71    0.43
   7  -3  -3    1.73    0.20
   7  -3  -3    0.92    0.30
   7  -3  -3    1.59    0.27
   7  -3  -3    1.51    0.18
   7  -3  -3    1.49    0.20
   7  -3  -3    1.46    0.32
  -7   3   3    1.55    0.24
  -7   3   3    0.92    0.20
  -7   3   3    1.41    0.28
   6  -3  -3    0.51    0.15
   6  -3  -3    0.89    0.23
   6  -3  -3    0.51    0.17
   6  -3  -3    0.52    0.15
   6  -3  -3    0.72    0.21
   6  -3  -3    0.35    0.24
   6  -3  -3    0.85    0.20
  -6   3   3    0.39    0.20
  -6   3   3    0.46    0.16
  -6   3   3    0.21    0.24
   5  -3  -3    0.00    0.13
   5  -3  -3    0.07    0.18
   5  -3  -3    0.09    0.14
   5  -3  -3   -0.17    0.16
   5  -3  -3    0.08    0.14
   5  -3  -3   -0.04    0.20
   5  -3  -3    0.17    0.19
  -5   3   3    0.18    0.16
  -5   3   3    0.13    0.15
   4  -3  -3   23.22    0.81
   4  -3  -3   22.47    0.73
   4  -3  -3   22.62    0.77
   4  -3  -3   22.40    0.76
   4  -3  -3   23.43    0.87
   4  -3  -3   22.60    0.83
   4  -3  -3   22.26    0.79
   4  -3  -3   23.20    0.77
  -4   3   3   22.66    0.76
  -4   3   3   22.79    0.80
   3  -3  -3    1.42    0.23
   3  -3  -3    1.08    0.19
   3  -3  -3    0.96    0.17
   3  -3  -3    1.34    0.22
   3  -3  -3    1.29    0.21
   3  -3  -3    1.06    0.23
   3  -3  -3    1.21    0.23
   3  -3  -3    1.71    0.22
   3  -3  -3    1.48    0.23
  -3   3   3    1.34    0.21
  -3   3   3    1.00    0.19
  -3   3   3    1.00    0.18
   2  -3  -3   71.26    1.91
   2  -3  -3   68.68    1.96
   2  -3  -3   68.75    1.94
   2  -3  -3   71.86    1.96
   2  -3  -3   72.49    1.98
   2  -3  -3   68.33    1.94
   2  -3  -3   70.67    1.91
   2  -3  -3   68.21    1.94
   2  -3  -3   71.45    1.93
  -2   3   3   68.20    1.90
  -2   3   3   69.98    1.91
  -2   3   3   68.53    1.90
   1  -3  -3   40.23    1.18
   1  -3  -3   40.57    1.20
   1  -3  -3   39.24    1.16
   1  -3  -3   38.92    1.20
   1  -3  -3   38.35    1.21
   1  -3  -3   40.83    1.17
  -1   3   3   40.05    1.18
  -1   3   3   40.33    1.21
  -1   3   3   40.98    1.23
   0  -3  -3    0.30    0.18
   0  -3  -3    0.15    0.16
   0  -3  -3    0.51    0.17
   0  -3  -3    0.31    0.15
   0   3   3    0.29    0.12
   0   3   3    0.06    0.16
   0   3   3    0.27    0.16
  -1  -3  -3    2.08    0.26
  -1  -3  -3    1.83    0.27
  -1  -3  -3    2.16    0.26
  -1  -3  -3    1.75    0.26
  -1  -3  -3    2.35    0.21
   1   3   3    1.92    0.25
   1   3   3    1.58    0.20
   1   3   3    1.90    0.25
  -2  -3  -3    4.80    0.26
  -2  -3  -3    4.50    0.35
  -2  -3  -3    5.20    0.33
  -2  -3  -3    5.36    0.41
   2   3   3    4.92    0.25
   2   3   3    5.15    0.36
   2   3   3    4.75    0.32
   2   3   3    4.86    0.36
  -3  -3  -3    0.20    0.18
  -3  -3  -3    0.21    0.16
  -3  -3  -3    0.06    0.09
   3   3   3    0.03    0.09
   3   3   3   -0.02    0.16
   3   3   3   -0.05    0.15
   3   3   3    0.17    0.15
  -4  -3  -3    2.52    0.26
  -4  -3  -3    2.32    0.28
  -4  -3  -3    2.32    0.18
   4   3   3    2.11    0.29
   4   3   3    2.75    0.31
   4   3   3    2.26    0.18
   4   3   3    2.39    0.30
  -5  -3  -3    0.46    0.21
  -5  -3  -3    0.56    0.22
  -5  -3  -3    0.86    0.12
  -5  -3  -3    0.87    0.18
   5   3   3    0.71    0.20
   5   3   3    0.49    0.25
   5   3   3    0.66    0.11
   5   3   3    0.50    0.23
  -6  -3  -3   18.39    0.66
  -6  -3  -3   17.39    0.73
  -6  -3  -3   17.52    0.56
   6   3   3   17.02    0.52
   6   3   3   18.57    0.78
   6   3   3   16.71    0.74
   6   3   3   17.24    0.70
  -7  -3  -3    1.00    0.26
  -7  -3  -3    1.49    0.23
  -7  -3  -3    1.12    0.16
   7   3   3    1.36    0.29
   7   3   3    1.62    0.28
   7   3   3    1.13    0.13
   7   3   3    1.10    0.31
  -8  -3  -3    4.54    0.39
  -8  -3  -3    4.18    0.30
  -8  -3  -3    5.29    0.44
   8   3   3    4.34    0.52
   8   3   3    5.29    0.49
   8   3   3    4.93    0.46
   8   3   3    4.33    0.25
  -9  -3  -3    0.18    0.20
  -9  -3  -3    0.46    0.28
  -9  -3  -3    0.36    0.18
   9   3   3    0.00    0.27
   9   3   3    0.79    0.14
   9   3   3    0.45    0.31
   9   3   3    0.17    0.30
 -10  -3  -3    5.05    0.53
 -10  -3  -3    4.17    0.43
 -10  -3  -3    4.76    0.38
  10   3   3    5.41    0.56
  10   3   3    4.38    0.51
  10   3   3    4.59    0.53
 -11  -3  -3   -0.04    0.26
 -11  -3  -3    0.02    0.33
  11   3   3    0.30    0.18
  11   3   3    0.16    0.33
 -12  -3  -3   -0.17    0.31
 -12  -3  -3   -0.50    0.30
 -12  -3  -3    0.53    0.30
  12   3   3   -0.20    0.24
  12   3   3   -0.04    0.20
  12   3   3    0.60    0.38
  12   3   3    0.23    0.41
 -13  -3  -3    0.15    0.34
 -13  -3  -3   -0.23    0.34
  13   3   3   -0.04    0.39
  13   3   3    0.11    0.23
  13   3   3    0.00    0.41
 -14  -3  -3    1.66    0.41
 -14  -3  -3    1.38    0.46
  14   3   3    1.23    0.54
  14   3   3    2.07    0.56
 -15  -3  -3    0.66    0.47
 -15  -3  -3    1.41    0.46
  15   3   3    1.49    0.63
  15   3   3   -0.15    0.58
 -16  -3  -3    0.19    0.48
 -16  -3  -3    0.97    0.54
  16   3   3    0.82    0.56
  16   3   3   -0.32    0.68
 -17  -3  -3   -1.19    0.54
 -17  -3  -3    0.86    0.55
  17   3   3    1.88    0.84
  17   3   3    0.61    0.71
  17  -4  -3    0.07    0.69
  17  -4  -3   -0.20    0.87
 -17   4   3    0.91    0.70
  16  -4  -3    1.97    0.76
  16  -4  -3    0.04    0.61
 -16   4   3    0.89    0.62
  15  -4  -3   -0.37    0.62
  15  -4  -3   -0.08    0.57
 -15   4   3    0.36    0.50
 -15   4   3   -0.09    0.39
  14  -4  -3    0.18    0.62
  14  -4  -3    0.43    0.51
 -14   4   3    0.96    0.39
 -14   4   3    1.04    0.49
  13  -4  -3    0.39    0.46
  13  -4  -3    0.56    0.54
  13  -4  -3   -0.48    0.28
 -13   4   3   -0.59    0.29
 -13   4   3    0.25    0.41
  12  -4  -3    1.03    0.27
  12  -4  -3    0.90    0.44
  12  -4  -3    1.05    0.50
  12  -4  -3    0.39    0.23
  12  -4  -3    0.86    0.17
 -12   4   3    0.77    0.33
 -12   4   3    0.26    0.42
  11  -4  -3    0.35    0.27
  11  -4  -3    0.33    0.48
  11  -4  -3   -0.30    0.34
  11  -4  -3    0.04    0.16
 -11   4   3    0.14    0.29
  10  -4  -3    1.39    0.22
  10  -4  -3    1.26    0.25
  10  -4  -3    1.37    0.27
  10  -4  -3    1.08    0.43
  10  -4  -3    0.74    0.34
 -10   4   3    1.72    0.38
 -10   4   3    1.04    0.30
   9  -4  -3    4.07    0.46
   9  -4  -3    3.70    0.56
   9  -4  -3    3.66    0.33
   9  -4  -3    4.35    0.39
  -9   4   3    2.96    0.50
  -9   4   3    4.32    0.49
  -9   4   3    3.70    0.42
   8  -4  -3   11.65    0.73
   8  -4  -3   10.74    0.48
   8  -4  -3    9.89    0.76
   8  -4  -3   11.84    0.56
   8  -4  -3   11.17    0.53
   8  -4  -3   11.11    0.66
  -8   4   3   11.54    0.58
  -8   4   3   11.18    0.67
   7  -4  -3    2.66    0.46
   7  -4  -3    2.43    0.29
   7  -4  -3    2.55    0.37
   7  -4  -3    2.46    0.36
   7  -4  -3    3.03    0.32
   7  -4  -3    2.68    0.33
  -7   4   3    2.38    0.36
  -7   4   3    2.49    0.30
   6  -4  -3   16.08    0.65
   6  -4  -3   15.83    0.72
   6  -4  -3   16.13    0.66
   6  -4  -3   17.11    0.84
   6  -4  -3   15.72    0.67
   6  -4  -3   15.79    0.74
  -6   4   3   16.18    0.69
  -6   4   3   15.86    0.73
   5  -4  -3    0.58    0.25
   5  -4  -3    0.23    0.22
   5  -4  -3    0.52    0.27
   5  -4  -3    0.16    0.23
   5  -4  -3    0.71    0.24
   5  -4  -3    0.39    0.25
  -5   4   3    0.39    0.23
  -5   4   3    0.69    0.26
   4  -4  -3    1.84    0.29
   4  -4  -3    1.68    0.27
   4  -4  -3    1.71    0.29
   4  -4  -3    1.57    0.29
   4  -4  -3    1.52    0.29
   4  -4  -3    1.78    0.33
   4  -4  -3    1.98    0.32
   4  -4  -3    1.80    0.32
  -4   4   3    1.92    0.29
  -4   4   3    1.40    0.26
   3  -4  -3    1.53    0.26
   3  -4  -3    1.74    0.28
   3  -4  -3    1.73    0.28
   3  -4  -3    1.43    0.31
   3  -4  -3    1.82    0.31
   3  -4  -3    1.84    0.32
   3  -4  -3    1.94    0.30
   3  -4  -3    1.35    0.28
   3  -4  -3    1.69    0.32
   3  -4  -3    1.26    0.26
   2  -4  -3    0.24    0.22
   2  -4  -3    0.29    0.23
   2  -4  -3    0.28    0.25
   2  -4  -3    0.53    0.23
   2  -4  -3    0.30    0.20
   2  -4  -3    0.95    0.25
   2  -4  -3    0.60    0.26
   2  -4  -3    0.29    0.25
   2  -4  -3    0.51    0.24
   2  -4  -3   -0.18    0.22
  -2   4   3    0.35    0.21
  -2   4   3    0.15    0.19
   1  -4  -3    1.84    0.29
   1  -4  -3    1.69    0.28
   1  -4  -3    1.24    0.27
   1  -4  -3    1.53    0.27
   1  -4  -3    1.78    0.26
   1  -4  -3    1.81    0.29
   1  -4  -3    2.31    0.34
   1  -4  -3    1.74    0.29
  -1   4   3    1.91    0.28
  -1   4   3    2.10    0.32
   0  -4  -3    2.73    0.33
   0  -4  -3    2.45    0.34
   0  -4  -3    2.72    0.34
   0  -4  -3    2.75    0.28
   0  -4  -3    2.88    0.31
   0  -4  -3    2.42    0.36
   0  -4  -3    2.49    0.34
   0  -4  -3    2.55    0.31
   0   4   3    2.63    0.31
   0   4   3    2.69    0.34
  -1  -4  -3    0.27    0.20
  -1  -4  -3    0.46    0.23
  -1  -4  -3    0.11    0.23
  -1  -4  -3    0.43    0.24
  -1  -4  -3    0.28    0.22
  -1  -4  -3    0.54    0.19
   1   4   3    0.13    0.26
   1   4   3    0.53    0.23
  -2  -4  -3   23.93    0.79
  -2  -4  -3   21.74    0.93
  -2  -4  -3   22.05    0.87
  -2  -4  -3   23.89    0.87
   2   4   3   22.73    0.87
   2   4   3   21.99    0.89
   2   4   3   22.27    0.74
   2   4   3   22.58    0.86
  -3  -4  -3    5.58    0.31
  -3  -4  -3    6.46    0.49
  -3  -4  -3    5.07    0.48
  -3  -4  -3    5.33    0.43
  -3  -4  -3    6.35    0.49
   3   4   3    5.46    0.47
   3   4   3    6.21    0.46
   3   4   3    5.40    0.46
  -4  -4  -3    0.22    0.12
  -4  -4  -3    0.18    0.20
  -4  -4  -3    0.49    0.28
  -4  -4  -3    0.48    0.28
   4   4   3    0.30    0.25
   4   4   3    0.43    0.13
   4   4   3    0.62    0.26
   4   4   3    0.12    0.24
  -5  -4  -3    2.09    0.37
  -5  -4  -3    2.08    0.29
  -5  -4  -3    2.54    0.21
  -5  -4  -3    2.45    0.37
   5   4   3    2.53    0.34
   5   4   3    2.73    0.20
   5   4   3    2.85    0.40
   5   4   3    2.48    0.37
  -6  -4  -3    0.30    0.32
  -6  -4  -3    0.21    0.23
   6   4   3    0.63    0.10
   6   4   3    0.34    0.30
   6   4   3    0.70    0.32
   6   4   3    0.93    0.32
  -7  -4  -3   -0.09    0.29
  -7  -4  -3   -0.01    0.23
   7   4   3    0.58    0.33
   7   4   3    0.07    0.36
   7   4   3    0.68    0.33
  -8  -4  -3    5.25    0.60
  -8  -4  -3    5.81    0.48
   8   4   3    5.88    0.61
   8   4   3    5.45    0.64
   8   4   3    5.62    0.66
  -9  -4  -3    2.91    0.36
   9   4   3    3.67    0.53
   9   4   3    3.60    0.52
 -10  -4  -3    0.10    0.30
 -10  -4  -3    0.23    0.40
  10   4   3    0.01    0.42
 -11  -4  -3    0.15    0.41
 -11  -4  -3    0.14    0.32
  11   4   3    0.67    0.45
  11   4   3    0.30    0.42
 -12  -4  -3   -0.25    0.38
 -12  -4  -3   -0.16    0.36
  12   4   3    0.34    0.50
  12   4   3    0.25    0.48
 -13  -4  -3    0.40    0.41
 -13  -4  -3   -0.08    0.45
  13   4   3    0.98    0.56
  13   4   3    0.20    0.54
 -14  -4  -3    0.69    0.47
 -14  -4  -3    0.62    0.50
  14   4   3    1.32    0.67
  14   4   3    0.04    0.65
 -15  -4  -3   -0.61    0.47
 -15  -4  -3    0.56    0.52
  15   4   3   -0.88    0.67
  15   4   3    0.25    0.63
 -16  -4  -3   -0.21    0.61
  15  -5  -3    0.04    0.75
  15  -5  -3    0.58    0.68
 -15   5   3   -0.26    0.64
  14  -5  -3    0.50    0.61
  14  -5  -3    0.83    0.80
 -14   5   3   -0.19    0.46
 -14   5   3    0.22    0.63
  13  -5  -3    0.18    0.71
  13  -5  -3    0.36    0.51
 -13   5   3   -0.33    0.43
 -13   5   3   -0.63    0.49
  12  -5  -3   -0.66    0.62
  12  -5  -3    0.35    0.54
 -12   5   3    0.01    0.48
 -12   5   3    0.72    0.42
  11  -5  -3    0.07    0.25
  11  -5  -3    0.48    0.60
 -11   5   3    0.16    0.43
 -11   5   3    0.45    0.39
  10  -5  -3    1.20    0.27
  10  -5  -3    1.71    0.36
  10  -5  -3    0.27    0.43
  10  -5  -3    1.30    0.63
 -10   5   3    1.31    0.37
 -10   5   3    0.92    0.46
   9  -5  -3   -0.11    0.34
   9  -5  -3    0.35    0.37
   9  -5  -3    0.36    0.55
   9  -5  -3    0.09    0.25
  -9   5   3   -0.22    0.36
  -9   5   3    0.14    0.33
   8  -5  -3    0.44    0.29
   8  -5  -3    0.84    0.38
   8  -5  -3   -0.13    0.46
   8  -5  -3    0.29    0.35
   8  -5  -3    0.34    0.35
  -8   5   3    0.96    0.40
  -8   5   3    0.65    0.35
   7  -5  -3    2.49    0.42
   7  -5  -3    1.51    0.45
   7  -5  -3    1.26    0.44
   7  -5  -3    1.74    0.34
   7  -5  -3    2.34    0.43
   7  -5  -3    1.82    0.47
  -7   5   3    2.24    0.40
  -7   5   3    1.88    0.39
   6  -5  -3    1.35    0.37
   6  -5  -3    1.25    0.35
   6  -5  -3    1.34    0.48
   6  -5  -3    1.58    0.36
   6  -5  -3    1.17    0.45
   6  -5  -3    2.32    0.36
   6  -5  -3    2.12    0.45
  -6   5   3    1.93    0.37
   5  -5  -3    0.68    0.29
   5  -5  -3   -0.05    0.40
   5  -5  -3    0.22    0.34
   5  -5  -3    0.52    0.34
   5  -5  -3    0.11    0.31
   5  -5  -3    0.08    0.37
   5  -5  -3   -0.15    0.35
  -5   5   3    0.11    0.31
   4  -5  -3    0.89    0.34
   4  -5  -3    0.80    0.38
   4  -5  -3    1.50    0.38
   4  -5  -3    0.53    0.40
   4  -5  -3    1.18    0.36
   4  -5  -3    1.19    0.35
   4  -5  -3    1.77    0.46
   3  -5  -3    5.20    0.58
   3  -5  -3    6.23    0.60
   3  -5  -3    5.02    0.55
   3  -5  -3    4.91    0.56
   3  -5  -3    5.59    0.62
   3  -5  -3    6.07    0.62
   3  -5  -3    5.89    0.58
   3  -5  -3    5.75    0.60
   3  -5  -3    5.07    0.63
   3  -5  -3    5.62    0.56
   2  -5  -3   -0.19    0.31
   2  -5  -3    0.27    0.34
   2  -5  -3    0.18    0.36
   2  -5  -3    0.91    0.32
   2  -5  -3   -0.22    0.31
   2  -5  -3    0.35    0.36
   2  -5  -3    0.10    0.36
   2  -5  -3   -0.24    0.31
   2  -5  -3   -0.35    0.33
  -2   5   3   -0.12    0.27
   1  -5  -3    0.67    0.35
   1  -5  -3    0.95    0.31
   1  -5  -3    1.11    0.41
   1  -5  -3    0.79    0.31
   1  -5  -3    1.40    0.37
   1  -5  -3    0.25    0.33
  -1   5   3    0.96    0.29
  -1   5   3    0.94    0.36
   0  -5  -3    2.04    0.42
   0  -5  -3    3.84    0.43
   0  -5  -3    2.84    0.44
   0  -5  -3    3.76    0.44
   0  -5  -3    3.40    0.39
   0  -5  -3    3.24    0.44
   0   5   3    2.96    0.44
   0   5   3    2.97    0.38
  -1  -5  -3    3.09    0.47
  -1  -5  -3    2.77    0.44
  -1  -5  -3    3.75    0.42
  -1  -5  -3    3.98    0.45
  -1  -5  -3    3.36    0.42
  -1  -5  -3    3.59    0.44
   1   5   3    2.92    0.42
   1   5   3    3.49    0.45
  -2  -5  -3    5.33    0.59
  -2  -5  -3    5.13    0.45
  -2  -5  -3    4.92    0.42
  -2  -5  -3    4.66    0.52
  -2  -5  -3    5.05    0.53
   2   5   3    3.85    0.49
   2   5   3    4.62    0.50
  -3  -5  -3    0.64    0.43
  -3  -5  -3    1.22    0.25
  -3  -5  -3    0.96    0.36
  -3  -5  -3    1.05    0.38
  -3  -5  -3    0.79    0.22
   3   5   3    1.10    0.34
   3   5   3    0.15    0.34
   3   5   3    1.13    0.36
  -4  -5  -3    6.15    0.58
  -4  -5  -3    6.86    0.37
  -4  -5  -3    7.16    0.40
  -4  -5  -3    8.05    0.76
   4   5   3    7.98    0.62
   4   5   3    6.22    0.63
   4   5   3    6.56    0.69
  -5  -5  -3    0.29    0.31
  -5  -5  -3    0.30    0.15
  -5  -5  -3    0.29    0.15
   5   5   3    0.52    0.34
   5   5   3   -0.20    0.35
  -6  -5  -3   16.26    0.98
  -6  -5  -3   16.20    0.82
   6   5   3   16.13    0.90
   6   5   3   15.84    0.91
  -7  -5  -3    2.32    0.40
  -7  -5  -3    2.50    0.53
   7   5   3    2.97    0.49
   7   5   3    2.95    0.54
  -8  -5  -3    0.28    0.31
  -8  -5  -3   -0.23    0.40
   8   5   3   -0.09    0.45
  -9  -5  -3   -0.30    0.33
  -9  -5  -3   -0.26    0.42
   9   5   3   -0.34    0.48
   9   5   3   -0.46    0.43
 -10  -5  -3    0.53    0.51
 -10  -5  -3    0.44    0.38
  10   5   3    0.20    0.49
  10   5   3    0.17    0.54
 -11  -5  -3   -0.13    0.49
  11   5   3   -0.22    0.60
  11   5   3    0.07    0.55
 -12  -5  -3   -0.15    0.58
 -12  -5  -3    0.37    0.46
  12   5   3    0.66    0.64
  12   5   3    0.40    0.68
 -13  -5  -3    0.96    0.52
 -13  -5  -3   -0.73    0.53
  13   5   3   -0.49    0.71
  13   5   3    0.19    0.72
 -14  -5  -3    0.73    0.72
 -14  -5  -3    1.78    0.61
  14   5   3    0.99    0.82
  14   5   3    0.03    0.73
  13  -6  -3    1.27    0.89
  13  -6  -3    1.13    0.69
 -13   6   3    1.40    0.72
  12  -6  -3    0.81    0.80
  12  -6  -3    0.39    0.66
 -12   6   3    0.19    0.61
 -12   6   3    0.87    0.67
  11  -6  -3   -0.58    0.70
  11  -6  -3   -0.05    0.54
  11  -6  -3    0.32    0.76
 -11   6   3    0.38    0.56
 -11   6   3    0.67    0.62
  10  -6  -3    0.40    0.54
  10  -6  -3   -0.77    0.72
  10  -6  -3    0.47    0.67
 -10   6   3    0.92    0.62
   9  -6  -3    0.87    0.38
   9  -6  -3    0.54    0.67
   9  -6  -3   -0.30    0.67
   8  -6  -3    0.85    0.68
   8  -6  -3    0.26    0.40
   8  -6  -3    0.35    0.61
   8  -6  -3   -0.08    0.47
   8  -6  -3    0.56    0.62
   7  -6  -3    0.48    0.58
   7  -6  -3    0.89    0.62
   7  -6  -3    0.31    0.43
   7  -6  -3    0.03    0.44
   7  -6  -3    0.91    0.58
  -7   6   3    0.30    0.43
   6  -6  -3    1.45    0.57
   6  -6  -3    2.00    0.46
   6  -6  -3    0.28    0.54
   6  -6  -3    0.46    0.47
   5  -6  -3    0.08    0.46
   5  -6  -3    0.24    0.52
   5  -6  -3    0.14    0.52
   5  -6  -3    0.77    0.45
   5  -6  -3    0.06    0.55
   4  -6  -3    2.11    0.57
   4  -6  -3    2.65    0.62
   4  -6  -3    1.85    0.46
   4  -6  -3    1.85    0.49
   4  -6  -3    2.19    0.55
   3  -6  -3    0.69    0.46
   3  -6  -3    0.74    0.48
   3  -6  -3    0.91    0.44
   3  -6  -3    0.77    0.49
   2  -6  -3    2.42    0.58
   2  -6  -3    2.39    0.50
   2  -6  -3    1.66    0.49
   2  -6  -3    2.49    0.49
   2  -6  -3    2.36    0.52
  -2   6   3    1.94    0.47
   1  -6  -3   -0.16    0.46
   1  -6  -3    0.16    0.43
   1  -6  -3   -0.57    0.43
   1  -6  -3    0.32    0.40
   1  -6  -3   -0.06    0.39
  -1   6   3    0.37    0.36
   0  -6  -3    0.44    0.42
   0  -6  -3    0.63    0.40
   0  -6  -3    0.58    0.48
   0   6   3    0.62    0.41
   0   6   3    0.33    0.36
  -1  -6  -3    0.40    0.34
  -1  -6  -3    0.75    0.38
  -1  -6  -3    0.22    0.49
  -1  -6  -3   -0.04    0.39
   1   6   3    0.22    0.46
   1   6   3    0.13    0.39
  -2  -6  -3    1.03    0.34
  -2  -6  -3    1.16    0.48
  -2  -6  -3    1.61    0.35
  -2  -6  -3    1.52    0.56
   2   6   3    1.54    0.43
   2   6   3    1.31    0.49
  -3  -6  -3    2.23    0.34
  -3  -6  -3    3.06    0.51
  -3  -6  -3    3.37    0.61
   3   6   3    3.36    0.53
   3   6   3    2.93    0.59
  -4  -6  -3    0.97    0.44
  -4  -6  -3    0.26    0.52
   4   6   3   -0.23    0.49
   4   6   3   -0.35    0.40
  -5  -6  -3    0.24    0.40
  -5  -6  -3    0.83    0.52
   5   6   3   -0.86    0.46
  -6  -6  -3    1.91    0.62
  -6  -6  -3    1.98    0.51
   6   6   3    0.73    0.53
   6   6   3    1.93    0.54
  -7  -6  -3   -0.11    0.45
  -7  -6  -3   -0.28    0.57
   7   6   3   -0.03    0.55
   7   6   3   -0.22    0.48
  -8  -6  -3   -1.20    0.54
   8   6   3   -0.68    0.63
   8   6   3    0.45    0.54
  -9  -6  -3   -0.79    0.61
  -9  -6  -3    0.66    0.51
   9   6   3    0.14    0.68
   9   6   3   -0.79    0.64
 -10  -6  -3    0.77    0.52
 -10  -6  -3   -0.64    0.66
  10   6   3   -0.15    0.67
  10   6   3    0.86    0.66
 -11  -6  -3    0.68    0.71
 -11  -6  -3    0.59    0.58
  11   6   3    0.88    0.74
  11   6   3   -1.12    0.71
   9  -7  -3    0.21    0.83
   9  -7  -3    0.07    0.91
   9  -7  -3    0.78    0.67
   9  -7  -3    0.90    0.94
   8  -7  -3   -0.26    0.75
   8  -7  -3    0.25    0.62
   8  -7  -3    0.71    0.78
   8  -7  -3    0.08    0.80
   7  -7  -3    1.33    0.62
   7  -7  -3    1.64    0.74
   7  -7  -3    0.78    0.82
   7  -7  -3    0.15    0.81
   6  -7  -3    0.09    0.67
   6  -7  -3    0.43    0.77
   6  -7  -3   -0.72    0.78
   6  -7  -3    0.09    0.62
   6  -7  -3    0.12    0.58
   5  -7  -3    0.83    0.73
   5  -7  -3    1.31    0.66
   5  -7  -3   -0.22    0.64
   5  -7  -3    0.27    0.69
   4  -7  -3    0.83    0.77
   4  -7  -3    0.28    0.60
   4  -7  -3   -0.85    0.59
   4  -7  -3    0.26    0.62
   4  -7  -3   -0.84    0.68
   3  -7  -3   -0.30    0.57
   3  -7  -3    0.57    0.58
   3  -7  -3   -0.02    0.64
   3  -7  -3    1.25    0.66
   3  -7  -3    0.33    0.61
   2  -7  -3   -1.37    0.60
   2  -7  -3   -0.33    0.52
   2  -7  -3    0.50    0.58
   2  -7  -3   -0.89    0.62
   2  -7  -3   -0.84    0.59
   1  -7  -3   -0.23    0.62
   1  -7  -3    0.50    0.67
   1  -7  -3    1.13    0.67
   1  -7  -3    0.59    0.61
   1  -7  -3    0.46    0.51
   0  -7  -3   -0.17    0.71
   0  -7  -3    0.07    0.49
   0  -7  -3   -0.49    0.58
   0  -7  -3    0.23    0.56
   0   7   3   -0.39    0.56
  -1  -7  -3    0.60    0.67
  -1  -7  -3    0.80    0.60
  -1  -7  -3   -0.30    0.70
   1   7   3    0.45    0.54
  -2  -7  -3    0.82    0.68
  -2  -7  -3   -0.15    0.56
   2   7   3    0.41    0.67
   2   7   3   -0.42    0.52
  -3  -7  -3    1.09    0.75
  -3  -7  -3   -0.57    0.58
   3   7   3    0.97    0.66
   3   7   3   -0.52    0.54
  -4  -7  -3    0.13    0.57
  -4  -7  -3    1.41    0.73
   4   7   3    0.67    0.68
   4   7   3   -0.07    0.56
  -5  -7  -3    1.30    0.60
  -5  -7  -3    1.24    0.74
   5   7   3    0.04    0.61
   5   7   3   -0.14    0.62
  -6  -7  -3   -0.75    0.72
  -6  -7  -3    0.17    0.62
   6   7   3   -0.09    0.70
   6   7   3   -0.39    0.64
  -7  -7  -3   -0.59    0.82
  -7  -7  -3   -0.11    0.63
   7   7   3    0.41    0.81
   7   7   3    1.28    0.74
   9   7  -4    1.19    0.76
  -9  -7   4    0.23    0.98
  -9  -7   4    1.55    0.74
   8   7  -4    0.73    0.70
  -8  -7   4    0.46    0.80
  -8  -7   4    0.62    0.72
   7   7  -4    0.77    0.72
  -7  -7   4    0.17    0.71
  -7  -7   4   -0.83    0.77
   6   7  -4    1.30    0.61
  -6  -7   4    1.42    0.68
  -6  -7   4    1.73    0.69
   5   7  -4   -0.26    0.57
  -5  -7   4   -1.36    0.67
  -5  -7   4   -0.52    0.69
   4   7  -4    0.30    0.66
  -4  -7   4    0.36    0.63
  -4  -7   4    0.24    0.72
   3   7  -4    0.63    0.63
  -3  -7   4   -0.18    0.66
  -3  -7   4    0.42    0.74
   2   7  -4   -0.67    0.56
  -2  -7   4    0.37    0.66
  -2  -7   4   -0.14    0.72
   1   7  -4    0.25    0.55
  -1  -7   4    0.30    0.68
  -1  -7   4   -1.13    0.63
  -1  -7   4    0.11    0.44
   0   7  -4   -0.49    0.52
   0  -7   4   -0.22    0.71
   0  -7   4    0.36    0.67
   0  -7   4    0.46    0.48
  -1   7  -4    0.12    0.54
  -1   7  -4   -0.24    0.62
   1  -7   4   -0.65    0.49
   1  -7   4   -0.45    0.67
   1  -7   4    0.13    0.68
  -2   7  -4    1.48    0.65
  -2   7  -4    2.19    0.59
   2  -7   4    0.31    0.72
   2  -7   4    0.35    0.71
   2  -7   4    1.00    0.58
  -3   7  -4    0.59    0.65
   3  -7   4    0.40    0.65
   3  -7   4    0.68    0.72
  -4   7  -4   -0.09    0.54
  -4   7  -4   -0.41    0.63
   4  -7   4   -0.24    0.68
   4  -7   4    0.09    0.80
   4  -7   4   -0.89    0.61
  -5   7  -4    0.39    0.65
   5  -7   4   -1.29    0.79
   5  -7   4    0.11    0.72
   5  -7   4   -0.51    0.65
  -6   7  -4    1.34    0.71
   6  -7   4    0.43    0.80
   6  -7   4    0.09    0.80
  -7   7  -4    0.09    0.70
   7  -7   4   -0.05    0.81
   7  -7   4   -1.77    0.84
  13   6  -4    0.58    0.82
  13   6  -4   -0.08    0.72
 -13  -6   4   -0.78    0.64
 -13  -6   4   -2.12    0.79
  12   6  -4   -0.18    0.62
  12   6  -4   -1.06    0.65
 -12  -6   4   -0.95    0.70
 -12  -6   4    1.08    0.61
  11   6  -4    0.96    0.62
  11   6  -4    0.50    0.58
 -11  -6   4   -0.14    0.62
 -11  -6   4    0.08    0.59
  10   6  -4    0.55    0.51
  10   6  -4    1.24    0.59
 -10  -6   4    0.10    0.58
 -10  -6   4    0.89    0.66
   9   6  -4    0.77    0.61
   9   6  -4    0.62    0.48
  -9  -6   4    1.26    0.66
  -9  -6   4    1.13    0.56
   8   6  -4    0.82    0.54
   8   6  -4    1.76    0.45
  -8  -6   4    1.33    0.67
  -8  -6   4    0.69    0.57
   7   6  -4    0.74    0.55
   7   6  -4    0.59    0.39
  -7  -6   4    1.16    0.55
  -7  -6   4    0.55    0.50
   6   6  -4    0.54    0.36
   6   6  -4    0.08    0.43
  -6  -6   4    0.14    0.50
  -6  -6   4    0.46    0.50
  -6  -6   4    0.04    0.39
   5   6  -4    1.58    0.49
   5   6  -4    1.32    0.39
  -5  -6   4    1.37    0.15
  -5  -6   4    0.73    0.38
  -5  -6   4    1.11    0.49
  -5  -6   4    1.34    0.58
   4   6  -4    1.38    0.49
   4   6  -4    2.62    0.37
  -4  -6   4    2.19    0.38
  -4  -6   4    1.57    0.28
  -4  -6   4    1.89    0.56
  -4  -6   4    1.12    0.52
   3   6  -4    2.75    0.51
   3   6  -4    2.87    0.38
  -3  -6   4    3.40    0.41
  -3  -6   4    3.38    0.37
  -3  -6   4    3.12    0.63
  -3  -6   4    2.95    0.36
  -3  -6   4    2.92    0.59
  -2  -6   4   -0.23    0.48
  -2  -6   4   -0.05    0.32
  -2  -6   4   -0.21    0.46
  -2  -6   4   -0.05    0.29
  -2  -6   4   -0.41    0.34
  -2  -6   4    0.11    0.30
   1   6  -4   -0.05    0.41
   1   6  -4   -0.56    0.42
  -1  -6   4    0.38    0.33
  -1  -6   4   -0.51    0.29
  -1  -6   4    0.32    0.50
  -1  -6   4   -0.20    0.49
  -1  -6   4   -0.19    0.29
   0   6  -4    0.75    0.45
   0   6  -4    0.58    0.41
   0  -6   4    0.09    0.35
   0  -6   4    1.32    0.46
   0  -6   4    0.43    0.30
   0  -6   4    1.50    0.53
   0  -6   4    0.81    0.29
   0  -6   4    0.05    0.45
  -1   6  -4    0.57    0.45
  -1   6  -4   -0.23    0.40
   1  -6   4    0.28    0.29
   1  -6   4    0.33    0.28
   1  -6   4    0.13    0.41
   1  -6   4    0.60    0.50
   1  -6   4    0.71    0.49
  -2   6  -4    0.44    0.36
  -2   6  -4   -0.20    0.43
   2  -6   4    0.92    0.28
   2  -6   4    0.47    0.43
   2  -6   4    0.54    0.31
   2  -6   4   -0.37    0.48
  -3   6  -4    1.18    0.41
  -3   6  -4    1.33    0.49
   3  -6   4    1.06    0.49
   3  -6   4    1.80    0.31
   3  -6   4    1.36    0.61
  -4   6  -4    0.13    0.37
  -4   6  -4   -0.10    0.44
   4  -6   4    0.42    0.56
   4  -6   4    0.41    0.52
   4  -6   4    0.45    0.30
   4  -6   4    1.02    0.43
  -5   6  -4    3.49    0.57
  -5   6  -4    2.65    0.46
   5  -6   4    1.45    0.47
   5  -6   4    2.96    0.61
   5  -6   4    2.54    0.37
   5  -6   4    3.40    0.71
  -6   6  -4    0.86    0.46
   6  -6   4    1.70    0.65
   6  -6   4   -0.07    0.59
   6  -6   4    1.32    0.35
   6  -6   4    1.05    0.44
  -7   6  -4    0.68    0.48
   7  -6   4    0.35    0.36
   7  -6   4    0.20    0.42
   7  -6   4    0.56    0.69
   7  -6   4   -0.16    0.63
  -8   6  -4   -0.27    0.50
   8  -6   4    0.79    0.68
   8  -6   4    0.20    0.38
   8  -6   4    0.20    0.69
  -9   6  -4    0.07    0.57
   9  -6   4    0.40    0.80
   9  -6   4   -0.14    0.75
 -10   6  -4   -0.77    0.59
  10  -6   4    1.34    0.85
  10  -6   4    0.26    0.80
 -11   6  -4   -1.78    0.62
  11  -6   4    1.49    0.83
  11  -6   4    0.96    0.87
  15   5  -4   -0.10    0.59
  15   5  -4    0.16    0.77
 -15  -5   4    0.48    0.62
 -15  -5   4    0.05    0.57
  14   5  -4    0.83    0.57
  14   5  -4   -0.36    0.60
 -14  -5   4    0.67    0.52
 -14  -5   4   -0.44    0.63
  13   5  -4    0.05    0.58
  13   5  -4    0.26    0.52
 -13  -5   4    0.05    0.63
 -13  -5   4    0.71    0.49
  12   5  -4   -0.52    0.58
  12   5  -4    0.41    0.45
 -12  -5   4   -0.16    0.55
 -12  -5   4    0.39    0.43
  11   5  -4    5.40    0.64
  11   5  -4    4.79    0.68
 -11  -5   4    3.95    0.56
 -11  -5   4    5.93    0.72
  10   5  -4   -0.53    0.45
  10   5  -4    0.36    0.41
 -10  -5   4    0.56    0.53
 -10  -5   4    0.05    0.39
   9   5  -4    4.39    0.50
   9   5  -4    3.44    0.61
  -9  -5   4    4.85    0.66
   8   5  -4    0.45    0.33
   8   5  -4    0.70    0.42
  -8  -5   4    0.34    0.39
  -8  -5   4    0.15    0.46
  -8  -5   4    0.40    0.37
   7   5  -4    3.25    0.40
  -7  -5   4    2.93    0.46
  -7  -5   4    2.74    0.42
   6   5  -4    1.33    0.38
   6   5  -4    1.23    0.32
  -6  -5   4    1.03    0.31
  -6  -5   4    1.21    0.40
  -6  -5   4    1.03    0.40
   5   5  -4   -0.17    0.25
   5   5  -4    0.17    0.35
  -5  -5   4   -0.04    0.26
  -5  -5   4   -0.07    0.39
  -5  -5   4    0.06    0.10
  -5  -5   4    0.12    0.33
  -5  -5   4    0.08    0.12
   4   5  -4    3.36    0.48
   4   5  -4    3.39    0.40
  -4  -5   4    2.49    0.46
  -4  -5   4    2.94    0.30
  -4  -5   4    3.10    0.53
  -4  -5   4    3.28    0.30
  -4  -5   4    3.17    0.34
   3   5  -4   -0.13    0.20
   3   5  -4   -0.41    0.30
  -3  -5   4    0.05    0.20
  -3  -5   4   -0.07    0.19
  -3  -5   4    0.01    0.21
  -3  -5   4    0.37    0.39
  -3  -5   4    0.26    0.34
   2   5  -4   -0.01    0.33
   2   5  -4    0.39    0.29
   2   5  -4   -0.05    0.19
  -2  -5   4   -0.17    0.21
  -2  -5   4    0.39    0.41
  -2  -5   4    0.37    0.35
  -2  -5   4   -0.28    0.24
  -2  -5   4   -0.13    0.21
   1   5  -4    8.54    0.62
   1   5  -4    7.98    0.62
  -1  -5   4    8.86    0.48
  -1  -5   4    8.88    0.54
  -1  -5   4    8.38    0.45
  -1  -5   4    8.63    0.61
  -1  -5   4    7.97    0.67
  -1  -5   4    7.93    0.57
   0   5  -4    2.10    0.41
   0   5  -4    1.62    0.36
   0  -5   4    1.40    0.40
   0  -5   4    1.11    0.33
   0  -5   4    1.63    0.33
   0  -5   4    1.83    0.26
   0  -5   4    1.86    0.25
   0  -5   4    1.51    0.33
  -1   5  -4    4.60    0.50
  -1   5  -4    4.62    0.50
   1  -5   4    4.18    0.48
   1  -5   4    4.08    0.52
   1  -5   4    4.12    0.46
   1  -5   4    4.52    0.60
   1  -5   4    4.92    0.38
   1  -5   4    4.10    0.36
  -2   5  -4   -0.04    0.29
  -2   5  -4    0.60    0.28
   2  -5   4    0.06    0.34
   2  -5   4    0.08    0.20
   2  -5   4    0.01    0.40
   2  -5   4    0.14    0.22
   2  -5   4    0.23    0.31
   2  -5   4    0.42    0.29
  -3   5  -4    3.04    0.43
  -3   5  -4    1.88    0.36
   3  -5   4    2.69    0.33
   3  -5   4    1.78    0.52
   3  -5   4    2.51    0.28
   3  -5   4    2.64    0.45
   3  -5   4    2.43    0.31
  -4   5  -4    0.18    0.35
  -4   5  -4   -0.14    0.26
   4  -5   4    0.49    0.25
   4  -5   4    0.20    0.21
   4  -5   4    0.58    0.40
   4  -5   4    0.73    0.44
   4  -5   4    0.48    0.27
  -5   5  -4    0.07    0.33
  -5   5  -4    0.43    0.27
   5  -5   4    0.69    0.27
   5  -5   4    0.17    0.23
   5  -5   4    0.09    0.41
   5  -5   4    0.09    0.24
  -6   5  -4   -0.10    0.36
   6  -5   4   -0.29    0.24
   6  -5   4    0.19    0.33
   6  -5   4   -0.53    0.45
   6  -5   4    0.01    0.25
   6  -5   4    0.30    0.29
   6  -5   4    0.24    0.49
   7  -5   4    3.02    0.34
   7  -5   4    2.70    0.33
   7  -5   4    3.61    0.61
   7  -5   4    2.92    0.37
   7  -5   4    2.39    0.55
  -8   5  -4    0.30    0.49
  -8   5  -4    0.06    0.38
   8  -5   4    0.53    0.58
   8  -5   4    0.08    0.31
   8  -5   4    0.82    0.55
   8  -5   4   -0.32    0.40
  -9   5  -4    0.35    0.47
  -9   5  -4    0.19    0.41
   9  -5   4    0.12    0.33
   9  -5   4    1.06    0.60
   9  -5   4    0.76    0.58
 -10   5  -4   -0.38    0.48
 -10   5  -4   -0.30    0.46
  10  -5   4    0.76    0.39
  10  -5   4   -0.26    0.65
 -11   5  -4    0.14    0.52
 -11   5  -4    1.06    0.63
  11  -5   4    0.47    0.46
  11  -5   4    1.16    0.70
 -12   5  -4   -0.23    0.50
 -12   5  -4    0.76    0.64
  12  -5   4   -0.06    0.49
  12  -5   4    0.57    0.72
 -13   5  -4    0.33    0.58
 -13   5  -4   -0.20    0.71
  13  -5   4    1.44    0.85
  13  -5   4    0.87    0.62
  17   4  -4    0.38    0.75
  17   4  -4   -0.19    0.58
 -17  -4   4   -1.02    0.50
 -17  -4   4    0.13    0.56
  16   4  -4   -0.85    0.53
  16   4  -4   -0.20    0.68
 -16  -4   4   -1.19    0.48
 -16  -4   4   -0.08    0.56
  15   4  -4   -0.36    0.61
  15   4  -4    0.63    0.51
 -15  -4   4    0.74    0.45
 -15  -4   4    0.31    0.47
  14   4  -4   -0.42    0.43
  14   4  -4    0.20    0.53
 -14  -4   4    0.21    0.45
 -14  -4   4    0.68    0.42
  13   4  -4    0.60    0.48
  13   4  -4    0.57    0.40
 -13  -4   4    0.68    0.46
 -13  -4   4    0.85    0.40
  12   4  -4    1.17    0.41
  12   4  -4    1.19    0.49
 -12  -4   4    1.86    0.39
  11   4  -4    0.00    0.30
 -11  -4   4    0.26    0.33
 -11  -4   4    0.41    0.39
  10   4  -4    0.57    0.41
  10   4  -4    1.37    0.32
 -10  -4   4    1.31    0.36
 -10  -4   4    1.05    0.33
 -10  -4   4    2.30    0.39
   9   4  -4    2.87    0.44
   9   4  -4    3.16    0.39
  -9  -4   4    3.07    0.41
  -9  -4   4    3.32    0.45
  -9  -4   4    3.43    0.43
   8   4  -4    0.28    0.31
   8   4  -4    0.37    0.24
  -8  -4   4    0.19    0.28
  -8  -4   4    0.27    0.33
  -8  -4   4    0.36    0.31
   7   4  -4    4.42    0.42
   7   4  -4    4.19    0.50
  -7  -4   4    4.56    0.43
  -7  -4   4    4.42    0.51
  -7  -4   4    4.80    0.51
   6   4  -4    0.20    0.26
   6   4  -4    0.30    0.20
  -6  -4   4    0.11    0.21
  -6  -4   4    0.23    0.29
  -6  -4   4   -0.11    0.30
   5   4  -4   14.94    0.73
   5   4  -4   14.72    0.60
  -5  -4   4   14.27    0.42
  -5  -4   4   15.39    0.76
  -5  -4   4   15.87    0.61
  -5  -4   4   14.87    0.43
  -5  -4   4   15.38    0.81
   4   4  -4    1.10    0.22
   4   4  -4    1.45    0.32
  -4  -4   4    1.33    0.15
  -4  -4   4    1.43    0.34
  -4  -4   4    1.09    0.20
  -4  -4   4    1.44    0.31
  -4  -4   4    1.47    0.16
   3   4  -4   -0.06    0.14
   3   4  -4   -0.09    0.21
   3   4  -4    0.12    0.21
  -3  -4   4   -0.09    0.28
  -3  -4   4    0.03    0.22
  -3  -4   4    0.35    0.25
  -3  -4   4    0.09    0.14
  -3  -4   4    0.20    0.15
   2   4  -4    2.15    0.32
   2   4  -4    1.80    0.25
   2   4  -4    1.49    0.28
  -2  -4   4    2.02    0.24
  -2  -4   4    1.86    0.27
  -2  -4   4    1.98    0.34
  -2  -4   4    1.73    0.23
  -2  -4   4    1.83    0.22
   1   4  -4   16.63    0.56
   1   4  -4   16.33    0.72
   1   4  -4   16.38    0.69
   1   4  -4   17.00    0.66
  -1  -4   4   17.06    0.69
  -1  -4   4   16.29    0.82
  -1  -4   4   17.41    0.57
  -1  -4   4   16.54    0.66
   0   4  -4    3.44    0.38
   0   4  -4    3.47    0.39
   0   4  -4    3.32    0.34
   0  -4   4    3.50    0.37
   0  -4   4    3.51    0.35
   0  -4   4    3.20    0.25
   0  -4   4    3.33    0.25
   0  -4   4    3.15    0.43
  -1   4  -4    1.83    0.32
  -1   4  -4    1.67    0.29
  -1   4  -4    1.69    0.28
   1  -4   4    1.63    0.19
   1  -4   4    1.54    0.23
   1  -4   4    1.37    0.27
   1  -4   4    1.90    0.22
   1  -4   4    1.93    0.37
  -2   4  -4    0.66    0.27
  -2   4  -4    0.93    0.25
  -2   4  -4    1.29    0.33
   2  -4   4    0.95    0.18
   2  -4   4    1.07    0.31
   2  -4   4    1.09    0.20
   2  -4   4    1.01    0.28
  -3   4  -4   29.88    1.04
  -3   4  -4   26.06    1.09
  -3   4  -4   29.29    0.94
   3  -4   4   31.82    1.23
   3  -4   4   30.39    0.91
   3  -4   4   29.57    0.94
   3  -4   4   30.44    1.12
  -4   4  -4    0.09    0.20
  -4   4  -4    0.47    0.24
   4  -4   4    0.25    0.26
   4  -4   4    0.98    0.21
   4  -4   4    0.24    0.17
   4  -4   4    0.76    0.32
   4  -4   4    0.82    0.18
  -5   4  -4   10.40    0.47
  -5   4  -4    9.89    0.65
  -5   4  -4   10.33    0.61
   5  -4   4    9.83    0.49
   5  -4   4   11.18    0.73
   5  -4   4   10.32    0.43
   5  -4   4   10.22    0.47
   5  -4   4    9.97    0.71
  -6   4  -4    8.02    0.66
  -6   4  -4    8.62    0.58
  -6   4  -4    7.35    0.51
   6  -4   4    7.35    0.50
   6  -4   4    7.45    0.34
   6  -4   4    6.89    0.44
   6  -4   4    8.38    0.69
   6  -4   4    8.44    0.74
  -7   4  -4    8.40    0.57
  -7   4  -4    8.50    0.60
  -7   4  -4    8.64    0.66
   7  -4   4    7.97    0.30
   7  -4   4    8.20    0.49
   7  -4   4    7.59    0.33
   7  -4   4    7.63    0.68
  -8   4  -4    3.11    0.46
  -8   4  -4    3.44    0.43
  -8   4  -4    3.04    0.43
   8  -4   4    2.28    0.48
   8  -4   4    3.27    0.37
  -9   4  -4    0.16    0.39
  -9   4  -4    0.18    0.32
  -9   4  -4    0.53    0.40
   9  -4   4    0.63    0.47
   9  -4   4    0.60    0.31
 -10   4  -4    0.44    0.41
 -10   4  -4    0.28    0.33
  10  -4   4    0.04    0.50
  10  -4   4    0.75    0.33
 -11   4  -4    0.66    0.46
  11  -4   4    0.94    0.58
  11  -4   4    0.82    0.40
 -12   4  -4    0.28    0.49
 -12   4  -4    0.29    0.42
  12  -4   4    0.06    0.57
  12  -4   4   -0.36    0.43
 -13   4  -4    1.36    0.50
 -13   4  -4    0.82    0.54
  13  -4   4    1.24    0.75
  13  -4   4    1.82    0.54
 -14   4  -4   -0.06    0.50
 -14   4  -4    0.30    0.59
  14  -4   4   -0.02    0.57
  14  -4   4    0.93    0.78
 -15   4  -4    1.10    0.57
 -15   4  -4   -0.13    0.72
  15  -4   4    0.63    0.84
  15  -4   4    1.80    0.68
  19   3  -4    1.93    0.77
 -19  -3   4    2.64    0.62
  18   3  -4    0.50    0.64
  18   3  -4    0.18    0.70
 -18  -3   4   -0.24    0.49
 -18  -3   4   -0.71    0.54
  17   3  -4    0.02    0.51
  17   3  -4   -0.14    0.61
 -17  -3   4    0.72    0.44
 -17  -3   4    1.38    0.45
  16   3  -4    0.59    0.50
  16   3  -4    0.35    0.56
 -16  -3   4    0.58    0.42
 -16  -3   4    0.96    0.44
  15   3  -4    0.44    0.45
  15   3  -4    0.55    0.42
 -15  -3   4    0.58    0.41
  14   3  -4    1.19    0.14
  14   3  -4    1.25    0.42
 -14  -3   4    1.53    0.38
 -14  -3   4    1.08    0.36
  13   3  -4   -0.35    0.30
  13   3  -4   -0.16    0.34
 -13  -3   4    0.09    0.29
 -13  -3   4    0.29    0.34
  12   3  -4    5.75    0.57
  12   3  -4    4.69    0.59
 -12  -3   4    5.52    0.56
 -12  -3   4    5.71    0.56
  11   3  -4    2.98    0.43
  11   3  -4    3.00    0.39
 -11  -3   4    3.93    0.49
 -11  -3   4    3.31    0.45
 -11  -3   4    3.79    0.44
  10   3  -4    8.15    0.55
  10   3  -4    8.63    0.64
 -10  -3   4    7.78    0.51
 -10  -3   4    9.65    0.59
 -10  -3   4    7.27    0.55
   9   3  -4   24.80    0.99
   9   3  -4   25.59    0.94
  -9  -3   4   25.13    0.94
  -9  -3   4   23.65    0.90
  -9  -3   4   26.19    0.98
   8   3  -4    6.43    0.42
   8   3  -4    5.50    0.47
  -8  -3   4    6.46    0.48
  -8  -3   4    6.12    0.51
  -8  -3   4    6.71    0.44
   7   3  -4    2.75    0.35
   7   3  -4    2.48    0.30
  -7  -3   4    2.85    0.34
  -7  -3   4    2.08    0.30
  -7  -3   4    2.53    0.28
   6   3  -4    5.78    0.35
   6   3  -4    6.32    0.47
  -6  -3   4    6.64    0.50
  -6  -3   4    6.38    0.46
  -6  -3   4    6.34    0.37
   5   3  -4    1.10    0.24
   5   3  -4    1.41    0.19
  -5  -3   4    1.18    0.18
  -5  -3   4    1.34    0.09
  -5  -3   4    1.56    0.25
  -5  -3   4    1.43    0.26
  -5  -3   4    1.52    0.24
   4   3  -4    0.21    0.16
   4   3  -4    0.00    0.08
   4   3  -4    0.08    0.17
  -4  -3   4    0.00    0.10
  -4  -3   4    0.25    0.16
  -4  -3   4    0.17    0.07
  -4  -3   4   -0.02    0.19
  -4  -3   4    0.15    0.18
   3   3  -4    0.10    0.09
   3   3  -4   -0.01    0.09
   3   3  -4    0.40    0.17
   3   3  -4    0.19    0.18
  -3  -3   4    0.34    0.10
  -3  -3   4   -0.03    0.18
  -3  -3   4    0.12    0.10
   2   3  -4    0.01    0.11
   2   3  -4    0.12    0.15
   2   3  -4    0.00    0.14
   2   3  -4    0.04    0.08
  -2  -3   4   -0.09    0.17
  -2  -3   4    0.01    0.10
  -2  -3   4    0.11    0.09
  -2  -3   4   -0.02    0.12
   1   3  -4    0.39    0.09
   1   3  -4    0.64    0.17
   1   3  -4    0.30    0.16
   1   3  -4    0.52    0.17
  -1  -3   4    0.57    0.14
  -1  -3   4    0.39    0.19
  -1  -3   4    0.59    0.10
  -1  -3   4    0.30    0.14
   0   3  -4   11.75    0.50
   0   3  -4   11.50    0.48
   0   3  -4   11.40    0.52
   0  -3   4   11.72    0.38
   0  -3   4   11.62    0.60
   0  -3   4   11.79    0.47
   0  -3   4   12.11    0.50
   0  -3   4   11.67    0.38
  -1   3  -4   19.03    0.70
  -1   3  -4   19.11    0.66
  -1   3  -4   18.67    0.70
   1  -3   4   18.76    0.57
   1  -3   4   20.01    0.78
   1  -3   4   18.91    0.56
   1  -3   4   18.95    0.63
   1  -3   4   19.88    0.72
  -2   3  -4    0.92    0.23
  -2   3  -4    0.70    0.19
  -2   3  -4    0.71    0.17
   2  -3   4    0.75    0.22
   2  -3   4    0.83    0.13
   2  -3   4    1.19    0.13
   2  -3   4    0.95    0.21
   2  -3   4    0.68    0.22
  -3   3  -4    0.18    0.14
  -3   3  -4    0.05    0.18
  -3   3  -4    0.19    0.19
  -3   3  -4    0.47    0.18
   3  -3   4    0.45    0.12
   3  -3   4    0.33    0.11
   3  -3   4    0.50    0.14
   3  -3   4    0.36    0.21
   3  -3   4    0.54    0.20
  -4   3  -4    1.46    0.18
  -4   3  -4    1.36    0.24
  -4   3  -4    0.92    0.27
  -4   3  -4    1.37    0.25
  -4   3  -4    1.13    0.15
   4  -3   4    1.24    0.16
   4  -3   4    1.42    0.28
   4  -3   4    1.11    0.13
  -5   3  -4    2.79    0.30
  -5   3  -4    2.74    0.27
  -5   3  -4    3.03    0.37
  -5   3  -4    2.98    0.20
   5  -3   4    2.89    0.26
   5  -3   4    3.09    0.30
   5  -3   4    2.69    0.17
   5  -3   4    1.97    0.32
  -6   3  -4    7.54    0.44
  -6   3  -4    7.30    0.50
  -6   3  -4    7.65    0.46
   6  -3   4    7.92    0.25
   6  -3   4    7.43    0.27
   6  -3   4    7.69    0.40
   6  -3   4    7.59    0.55
  -7   3  -4    7.33    0.47
  -7   3  -4    6.73    0.45
  -7   3  -4    6.22    0.51
   7  -3   4    6.42    0.42
   7  -3   4    6.37    0.56
   7  -3   4    7.04    0.40
  -8   3  -4   -0.09    0.28
  -8   3  -4   -0.08    0.23
  -8   3  -4    0.06    0.25
   8  -3   4    0.00    0.20
   8  -3   4    0.00    0.20
   8  -3   4   -0.13    0.30
  -9   3  -4    0.77    0.28
  -9   3  -4    0.80    0.30
  -9   3  -4    0.68    0.31
   9  -3   4    0.28    0.22
   9  -3   4    0.61    0.25
   9  -3   4    0.43    0.38
 -10   3  -4    0.18    0.36
 -10   3  -4    0.97    0.30
 -10   3  -4    0.75    0.37
  10  -3   4    0.83    0.32
  10  -3   4    0.73    0.45
 -11   3  -4    1.99    0.35
 -11   3  -4    1.77    0.47
  11  -3   4    2.07    0.40
  11  -3   4    2.17    0.56
 -12   3  -4    0.12    0.31
 -12   3  -4   -0.05    0.40
  12  -3   4    0.44    0.40
  12  -3   4   -0.28    0.48
 -13   3  -4    0.96    0.49
  13  -3   4    0.26    0.58
 -14   3  -4   -0.41    0.54
 -14   3  -4   -0.48    0.39
  14  -3   4   -0.02    0.61
  14  -3   4    0.06    0.48
 -15   3  -4    0.83    0.63
 -15   3  -4    0.61    0.48
  15  -3   4    1.07    0.56
  15  -3   4    1.70    0.73
 -16   3  -4   -0.53    0.49
 -16   3  -4   -0.15    0.70
  16  -3   4    1.13    0.69
  16  -3   4   -0.63    0.84
  19   2  -4    0.31    0.73
  19   2  -4   -0.31    0.67
 -19  -2   4    0.01    0.41
 -19  -2   4    0.15    0.53
  18   2  -4    0.74    0.58
  18   2  -4    1.77    0.62
 -18  -2   4    1.83    0.42
 -18  -2   4    1.91    0.50
  17   2  -4   -0.03    0.45
  17   2  -4    0.07    0.49
  17   2  -4   -0.57    0.37
 -17  -2   4   -0.30    0.38
  16   2  -4    1.15    0.35
  16   2  -4    0.77    0.43
  16   2  -4    0.02    0.45
 -16  -2   4    0.92    0.41
 -16  -2   4    0.55    0.34
  15   2  -4   -0.02    0.33
  15   2  -4    0.25    0.29
  15   2  -4    0.05    0.28
  15   2  -4   -0.11    0.41
 -15  -2   4    0.12    0.29
 -15  -2   4    0.59    0.29
  14   2  -4    0.18    0.24
  14   2  -4   -0.15    0.48
  14   2  -4    0.29    0.37
  14   2  -4   -0.25    0.25
  14   2  -4    0.01    0.32
 -14  -2   4   -0.10    0.25
 -14  -2   4   -0.25    0.26
  13   2  -4   -0.20    0.20
  13   2  -4    0.34    0.32
  13   2  -4    0.53    0.41
  13   2  -4   -0.13    0.22
  13   2  -4    0.17    0.29
 -13  -2   4   -0.09    0.26
 -13  -2   4   -0.22    0.25
 -13  -2   4   -0.07    0.23
  12   2  -4    0.25    0.27
  12   2  -4    0.72    0.34
  12   2  -4    0.70    0.31
  12   2  -4    0.52    0.19
 -12  -2   4    0.42    0.27
 -12  -2   4    0.42    0.24
 -12  -2   4    0.28    0.23
  11   2  -4    3.50    0.39
  11   2  -4    3.48    0.42
  11   2  -4    2.74    0.27
 -11  -2   4    3.75    0.39
 -11  -2   4    3.61    0.41
 -11  -2   4    3.77    0.41
  10   2  -4    4.38    0.41
  10   2  -4    4.69    0.48
  10   2  -4    4.57    0.26
  10   2  -4    4.54    0.39
  10   2  -4    3.96    0.26
 -10  -2   4    4.25    0.39
 -10  -2   4    3.74    0.37
 -10  -2   4    4.02    0.42
 -10  -2   4    3.62    0.36
   9   2  -4    0.28    0.10
   9   2  -4    0.40    0.22
   9   2  -4    0.33    0.20
   9   2  -4    0.29    0.21
   9   2  -4    0.35    0.11
  -9  -2   4    0.50    0.21
  -9  -2   4    0.16    0.20
  -9  -2   4    0.42    0.19
  -9  -2   4    0.48    0.23
   8   2  -4    0.24    0.09
   8   2  -4    0.18    0.07
   8   2  -4    0.28    0.20
   8   2  -4    0.34    0.18
   8   2  -4    0.17    0.15
  -8  -2   4   -0.06    0.16
  -8  -2   4    0.42    0.18
  -8  -2   4    0.32    0.17
  -8  -2   4    0.21    0.20
  -8  -2   4    0.23    0.16
   7   2  -4    2.53    0.26
   7   2  -4    2.34    0.13
   7   2  -4    2.40    0.14
   7   2  -4    2.94    0.28
  -7  -2   4    2.70    0.28
  -7  -2   4    2.63    0.30
  -7  -2   4    2.71    0.27
  -7  -2   4    2.77    0.27
   6   2  -4    4.34    0.28
   6   2  -4    4.43    0.16
   6   2  -4    4.44    0.33
  -6  -2   4    4.26    0.31
  -6  -2   4    4.62    0.34
  -6  -2   4    4.45    0.17
  -6  -2   4    4.62    0.28
  -6  -2   4    4.83    0.30
   5   2  -4    1.27    0.09
   5   2  -4    1.13    0.15
   5   2  -4    1.07    0.18
  -5  -2   4    1.12    0.19
  -5  -2   4    1.02    0.18
  -5  -2   4    1.53    0.18
  -5  -2   4    1.37    0.22
  -5  -2   4    1.06    0.09
   4   2  -4   30.49    0.81
   4   2  -4   31.36    0.95
   4   2  -4   30.45    0.86
   4   2  -4   30.33    0.93
  -4  -2   4   32.41    0.94
  -4  -2   4   29.16    0.95
  -4  -2   4   30.35    0.93
  -4  -2   4   30.45    0.96
  -4  -2   4   31.50    0.87
  -4  -2   4   30.98    0.81
   3   2  -4    0.20    0.11
   3   2  -4    0.17    0.13
   3   2  -4    0.17    0.07
   3   2  -4    0.17    0.07
  -3  -2   4    0.19    0.06
  -3  -2   4    0.21    0.07
  -3  -2   4    0.14    0.10
  -3  -2   4    0.22    0.13
   2   2  -4    0.12    0.10
   2   2  -4    0.29    0.06
   2   2  -4    0.23    0.08
   2   2  -4    0.11    0.11
  -2  -2   4    0.48    0.11
  -2  -2   4    0.28    0.06
  -2  -2   4    0.40    0.14
  -2  -2   4    0.32    0.08
   1   2  -4    0.08    0.11
   1   2  -4   -0.01    0.09
   1   2  -4    0.23    0.09
   1   2  -4    0.16    0.04
  -1  -2   4    0.05    0.07
  -1  -2   4    0.10    0.04
  -1  -2   4   -0.02    0.12
  -1  -2   4    0.04    0.08
   0   2  -4    1.63    0.18
   0   2  -4    1.52    0.18
   0  -2   4    1.76    0.15
   0  -2   4    1.71    0.17
   0  -2   4    1.35    0.20
   0  -2   4    1.85    0.09
   0  -2   4    1.74    0.08
  -1   2  -4   15.27    0.49
  -1   2  -4   15.61    0.54
   1  -2   4   16.32    0.62
   1  -2   4   15.57    0.44
   1  -2   4   15.01    0.56
   1  -2   4   15.91    0.49
   1  -2   4   15.86    0.52
   1  -2   4   15.19    0.43
  -2   2  -4   11.41    0.38
  -2   2  -4   11.63    0.37
  -2   2  -4   11.88    0.50
  -2   2  -4   11.27    0.49
   2  -2   4   11.62    0.50
   2  -2   4   12.63    0.53
   2  -2   4   11.74    0.44
   2  -2   4   11.60    0.37
   2  -2   4   11.61    0.37
  -3   2  -4    5.84    0.23
  -3   2  -4    5.62    0.26
  -3   2  -4    5.65    0.36
  -3   2  -4    5.92    0.34
  -3   2  -4    5.85    0.32
   3  -2   4    5.30    0.37
   3  -2   4    5.84    0.22
   3  -2   4    6.02    0.28
   3  -2   4    5.76    0.25
  -4   2  -4   18.26    0.61
  -4   2  -4   17.07    0.49
  -4   2  -4   17.41    0.67
  -4   2  -4   16.93    0.56
   4  -2   4   18.11    0.48
   4  -2   4   17.40    0.71
  -5   2  -4   12.23    0.48
  -5   2  -4   11.80    0.46
  -5   2  -4   12.31    0.56
   5  -2   4   12.59    0.62
   5  -2   4   12.49    0.47
  -6   2  -4    7.66    0.38
  -6   2  -4    7.12    0.37
  -6   2  -4    6.86    0.44
   6  -2   4    7.37    0.38
   6  -2   4    8.23    0.53
  -7   2  -4    5.95    0.42
  -7   2  -4    5.24    0.38
  -7   2  -4    5.87    0.35
   7  -2   4    6.31    0.39
   7  -2   4    5.71    0.33
  -8   2  -4    0.14    0.20
  -8   2  -4    0.01    0.20
  -8   2  -4    0.14    0.15
   8  -2   4    0.22    0.21
   8  -2   4    0.24    0.26
  -9   2  -4    0.35    0.25
  -9   2  -4   -0.34    0.23
  -9   2  -4    0.10    0.18
   9  -2   4    0.28    0.22
   9  -2   4    0.32    0.30
   9  -2   4    0.25    0.16
 -10   2  -4    0.04    0.26
 -10   2  -4   -0.39    0.28
 -10   2  -4   -0.07    0.18
  10  -2   4    0.08    0.20
  10  -2   4    0.17    0.27
  10  -2   4    0.39    0.32
 -11   2  -4    1.13    0.26
 -11   2  -4    0.84    0.34
  11  -2   4    0.88    0.43
  11  -2   4    0.26    0.32
 -12   2  -4    0.13    0.24
 -12   2  -4   -0.06    0.33
  12  -2   4    0.14    0.34
 -13   2  -4   10.84    0.65
 -13   2  -4    8.87    0.80
  13  -2   4   10.09    0.84
  13  -2   4   10.22    0.79
 -14   2  -4    0.85    0.36
 -14   2  -4    1.10    0.49
  14  -2   4    0.80    0.45
  14  -2   4    1.22    0.55
 -15   2  -4   -0.23    0.46
 -15   2  -4    0.22    0.35
  15  -2   4    1.15    0.54
  15  -2   4   -0.19    0.54
 -16   2  -4    1.04    0.44
 -16   2  -4    0.62    0.55
  16  -2   4    2.14    0.64
  16  -2   4    1.32    0.71
 -17   2  -4   -0.26    0.61
 -17   2  -4    0.17    0.47
  17  -2   4   -0.70    0.78
  17  -2   4    0.01    0.71
  20   1  -4    3.92    0.79
 -20  -1   4    2.04    0.65
 -20  -1   4    2.46    0.43
  19   1  -4   -0.74    0.54
  19   1  -4    0.75    0.65
  19   1  -4    0.38    0.57
 -19  -1   4   -0.27    0.51
  18   1  -4   -0.10    0.50
  18   1  -4    0.54    0.50
  18   1  -4    0.51    0.54
 -18  -1   4   -0.50    0.45
 -18  -1   4    0.17    0.30
  17   1  -4    0.22    0.45
  17   1  -4    1.35    0.51
  17   1  -4    0.15    0.45
 -17  -1   4    0.41    0.26
 -17  -1   4    0.53    0.40
  16   1  -4    1.65    0.42
  16   1  -4    1.30    0.44
  16   1  -4    1.47    0.47
  16   1  -4    1.34    0.48
  16   1  -4    1.44    0.52
 -16  -1   4    1.29    0.42
 -16  -1   4    1.81    0.28
  15   1  -4    1.87    0.41
  15   1  -4    0.85    0.47
  15   1  -4    0.94    0.39
  15   1  -4    1.21    0.36
 -15  -1   4    1.05    0.36
 -15  -1   4    1.23    0.25
  14   1  -4    1.01    0.36
  14   1  -4    0.90    0.36
  14   1  -4    1.06    0.32
  14   1  -4    0.99    0.33
  14   1  -4    1.01    0.37
 -14  -1   4    1.09    0.27
 -14  -1   4    0.85    0.22
 -14  -1   4    0.92    0.29
  13   1  -4    0.81    0.31
  13   1  -4    1.00    0.26
  13   1  -4    0.39    0.32
  13   1  -4    0.95    0.29
  13   1  -4    0.56    0.28
 -13  -1   4    0.40    0.26
 -13  -1   4    0.54    0.19
 -13  -1   4    0.66    0.23
  12   1  -4    4.72    0.41
  12   1  -4    3.48    0.40
  12   1  -4    3.86    0.45
  12   1  -4    3.93    0.46
  12   1  -4    3.46    0.41
 -12  -1   4    4.34    0.39
 -12  -1   4    4.10    0.37
 -12  -1   4    4.82    0.32
  11   1  -4    4.13    0.37
  11   1  -4    3.92    0.38
  11   1  -4    3.53    0.35
  11   1  -4    4.38    0.42
  11   1  -4    3.82    0.40
 -11  -1   4    3.95    0.31
 -11  -1   4    3.42    0.30
 -11  -1   4    3.50    0.34
  10   1  -4    1.85    0.24
  10   1  -4    1.70    0.22
  10   1  -4    2.24    0.28
  10   1  -4    2.11    0.25
  10   1  -4    1.65    0.25
 -10  -1   4    1.66    0.20
 -10  -1   4    2.08    0.25
 -10  -1   4    2.19    0.26
   9   1  -4    7.81    0.42
   9   1  -4    7.62    0.43
   9   1  -4    7.69    0.39
   9   1  -4    8.36    0.43
  -9  -1   4    7.63    0.37
  -9  -1   4    8.23    0.39
  -9  -1   4    8.23    0.42
   8   1  -4   32.33    1.00
   8   1  -4   32.48    0.94
   8   1  -4   31.63    0.98
   8   1  -4   31.84    0.99
  -8  -1   4   30.83    0.97
  -8  -1   4   31.92    0.93
  -8  -1   4   31.79    0.94
   7   1  -4    8.55    0.34
   7   1  -4    8.61    0.39
   7   1  -4    8.95    0.39
   7   1  -4    8.21    0.38
   7   1  -4    8.45    0.36
  -7  -1   4    8.27    0.36
  -7  -1   4    8.50    0.34
  -7  -1   4    8.57    0.40
  -7  -1   4    8.92    0.36
  -7  -1   4    8.13    0.38
   6   1  -4    0.36    0.11
   6   1  -4    0.59    0.10
   6   1  -4    0.36    0.12
   6   1  -4    0.32    0.12
  -6  -1   4    0.39    0.08
  -6  -1   4    0.38    0.12
  -6  -1   4    0.24    0.09
  -6  -1   4    0.18    0.12
  -6  -1   4    0.33    0.10
   5   1  -4    0.04    0.07
   5   1  -4    0.10    0.08
  -5  -1   4    0.03    0.08
  -5  -1   4   -0.02    0.08
  -5  -1   4    0.05    0.09
  -5  -1   4    0.05    0.06
  -5  -1   4   -0.03    0.09
   4   1  -4    2.84    0.21
   4   1  -4    2.69    0.17
   4   1  -4    3.13    0.17
   4   1  -4    3.00    0.15
  -4  -1   4    3.02    0.17
  -4  -1   4    2.93    0.18
  -4  -1   4    3.30    0.21
  -4  -1   4    3.04    0.17
  -4  -1   4    2.98    0.18
  -4  -1   4    3.09    0.15
   3   1  -4   56.36    1.41
   3   1  -4   55.83    1.40
   3   1  -4   52.28    1.42
   3   1  -4   54.20    1.47
   3   1  -4   55.03    1.45
  -3  -1   4   59.35    1.47
  -3  -1   4   55.56    1.46
  -3  -1   4   54.42    1.52
  -3  -1   4   59.46    1.50
  -3  -1   4   56.28    1.48
   2   1  -4    5.88    0.23
   2   1  -4    6.18    0.24
   2   1  -4    6.26    0.19
   2   1  -4    5.93    0.24
  -2  -1   4    6.39    0.24
  -2  -1   4    6.31    0.20
  -2  -1   4    6.13    0.23
  -2  -1   4    6.64    0.27
  -2  -1   4    6.10    0.24
   1   1  -4   20.05    0.58
   1   1  -4   18.93    0.50
   1   1  -4   19.25    0.57
   1   1  -4   20.28    0.61
   1   1  -4   19.57    0.56
  -1  -1   4   20.43    0.61
  -1  -1   4   18.66    0.57
  -1  -1   4   19.62    0.57
  -1  -1   4   20.07    0.56
   0   1  -4   54.60    1.34
   0   1  -4   52.74    1.45
   0   1  -4   53.91    1.40
   0   1  -4   56.54    1.41
   0   1  -4   53.49    1.44
   0  -1   4   56.45    1.43
   0  -1   4   55.20    1.41
   0  -1   4   55.79    1.37
   0  -1   4   54.61    1.48
   0  -1   4   54.63    1.46
   0  -1   4   54.95    1.47
  -1   1  -4  280.87    7.04
  -1   1  -4  272.71    7.02
  -1   1  -4  287.68    6.96
  -1   1  -4  301.66    7.07
  -1   1  -4  278.98    7.04
   1  -1   4  294.71    7.29
   1  -1   4  298.81    7.31
   1  -1   4  301.04    7.21
   1  -1   4  287.58    7.28
   1  -1   4  299.87    7.32
   1  -1   4  290.30    7.24
  -2   1  -4  161.24    3.97
  -2   1  -4  160.97    3.99
  -2   1  -4  164.20    4.09
  -2   1  -4  156.75    4.02
   2  -1   4  160.17    4.08
   2  -1   4  160.93    4.03
   2  -1   4  163.52    4.14
   2  -1   4  161.49    4.01
   2  -1   4  166.09    4.01
  -3   1  -4    4.14    0.21
  -3   1  -4    4.55    0.15
  -3   1  -4    4.29    0.21
  -3   1  -4    4.66    0.29
  -3   1  -4    4.38    0.26
   3  -1   4    4.50    0.16
   3  -1   4    4.54    0.22
   3  -1   4    4.05    0.28
   3  -1   4    4.16    0.20
  -4   1  -4   11.75    0.31
  -4   1  -4   11.39    0.32
  -4   1  -4   10.73    0.48
  -4   1  -4   11.38    0.41
  -4   1  -4   11.19    0.45
  -4   1  -4   11.71    0.41
   4  -1   4   11.31    0.50
   4  -1   4   11.32    0.43
   4  -1   4   11.26    0.32
   4  -1   4   10.99    0.39
  -5   1  -4   53.05    1.46
  -5   1  -4   54.35    1.43
  -5   1  -4   52.01    1.54
  -5   1  -4   55.64    1.32
  -5   1  -4   53.75    1.49
  -5   1  -4   48.53    1.31
   5  -1   4   56.34    1.46
   5  -1   4   55.00    1.60
   5  -1   4   53.14    1.51
   5  -1   4   55.08    1.51
  -6   1  -4   49.04    1.46
  -6   1  -4   50.05    1.43
  -6   1  -4   51.66    1.39
  -6   1  -4   51.72    1.54
   6  -1   4   51.72    1.54
   6  -1   4   50.07    1.44
   6  -1   4   52.17    1.46
  -7   1  -4    8.34    0.37
  -7   1  -4    7.94    0.43
  -7   1  -4    7.72    0.44
   7  -1   4    7.48    0.47
   7  -1   4    8.03    0.41
   7  -1   4    7.86    0.43
  -8   1  -4    1.55    0.25
  -8   1  -4    1.68    0.20
  -8   1  -4    1.92    0.26
   8  -1   4    1.51    0.29
   8  -1   4    1.55    0.21
   8  -1   4    1.85    0.28
   8  -1   4    1.85    0.25
  -9   1  -4    0.45    0.22
  -9   1  -4    0.65    0.24
  -9   1  -4    0.52    0.18
   9  -1   4    0.30    0.27
   9  -1   4    0.40    0.20
   9  -1   4    0.79    0.24
 -10   1  -4    3.99    0.44
 -10   1  -4    4.18    0.32
  10  -1   4    4.89    0.55
  10  -1   4    5.36    0.47
  10  -1   4    4.63    0.38
 -11   1  -4    0.17    0.18
 -11   1  -4    0.38    0.25
  11  -1   4    0.13    0.34
  11  -1   4    0.26    0.32
  11  -1   4   -0.06    0.24
 -12   1  -4   10.89    0.69
 -12   1  -4   10.84    0.55
  12  -1   4    9.95    0.72
  12  -1   4   10.28    0.74
 -13   1  -4    0.10    0.23
 -13   1  -4   -0.04    0.32
  13  -1   4    0.42    0.41
  13  -1   4    0.89    0.37
 -14   1  -4    4.41    0.47
 -14   1  -4    3.74    0.51
  14  -1   4    5.33    0.66
  14  -1   4    4.07    0.62
 -15   1  -4    0.49    0.32
 -15   1  -4    0.94    0.46
  15  -1   4    0.40    0.50
  15  -1   4    0.70    0.48
 -16   1  -4    0.19    0.37
 -16   1  -4    0.02    0.44
  16  -1   4    0.84    0.61
  16  -1   4   -0.16    0.57
 -17   1  -4   -0.07    0.58
 -17   1  -4   -0.04    0.40
  17  -1   4    0.28    0.72
  17  -1   4    0.26    0.62
 -18   1  -4    0.93    0.70
 -18   1  -4   -0.48    0.44
  18  -1   4   -0.47    0.76
  18  -1   4    0.67    0.80
  20   0  -4    3.61    0.80
  20   0  -4    5.56    0.84
 -20   0   4    2.69    0.67
  19   0  -4    0.23    0.66
  19   0  -4   -0.12    0.61
 -19   0   4    0.11    0.32
 -19   0   4   -0.35    0.49
  18   0  -4   -0.01    0.43
  18   0  -4    0.62    0.62
  18   0  -4    0.38    0.54
 -18   0   4   -0.59    0.42
 -18   0   4   -0.09    0.27
  17   0  -4   -0.21    0.37
  17   0  -4    0.11    0.50
  17   0  -4    0.81    0.47
  17   0  -4   -0.50    0.49
 -17   0   4    0.13    0.23
 -17   0   4   -0.22    0.39
  16   0  -4    3.54    0.50
  16   0  -4    3.89    0.56
  16   0  -4    3.79    0.43
  16   0  -4    4.61    0.57
 -16   0   4    3.69    0.40
 -16   0   4    3.97    0.35
 -16   0   4    3.52    0.48
  15   0  -4   -0.10    0.31
  15   0  -4   -0.32    0.28
  15   0  -4   -0.45    0.31
  15   0  -4    0.10    0.38
 -15   0   4   -0.05    0.16
 -15   0   4   -0.30    0.21
  14   0  -4    4.54    0.50
  14   0  -4    5.50    0.55
  14   0  -4    4.69    0.54
  14   0  -4    4.89    0.52
  14   0  -4    4.65    0.45
 -14   0   4    5.35    0.48
 -14   0   4    4.90    0.33
 -14   0   4    5.60    0.36
  13   0  -4    0.35    0.21
  13   0  -4   -0.36    0.23
  13   0  -4   -0.06    0.27
  13   0  -4    0.34    0.26
  13   0  -4    0.24    0.29
 -13   0   4   -0.03    0.13
 -13   0   4    0.21    0.16
 -13   0   4    0.26    0.22
  12   0  -4   16.12    0.75
  12   0  -4   15.71    0.64
  12   0  -4   17.34    0.66
  12   0  -4   16.67    0.74
  12   0  -4   17.76    0.77
 -12   0   4   15.55    0.57
 -12   0   4   16.79    0.71
 -12   0   4   16.79    0.55
  11   0  -4   -0.34    0.20
  11   0  -4    0.15    0.18
  11   0  -4   -0.06    0.15
  11   0  -4    0.21    0.21
  11   0  -4    0.15    0.21
 -11   0   4   -0.06    0.12
 -11   0   4   -0.15    0.16
 -11   0   4   -0.06    0.10
  10   0  -4    3.38    0.36
  10   0  -4    3.34    0.35
  10   0  -4    2.95    0.33
  10   0  -4    3.07    0.25
 -10   0   4    3.36    0.20
 -10   0   4    4.10    0.24
 -10   0   4    3.01    0.28
   9   0  -4    0.06    0.14
   9   0  -4   -0.07    0.12
   9   0  -4   -0.04    0.10
   9   0  -4   -0.13    0.15
   9   0  -4    0.02    0.16
  -9   0   4   -0.04    0.12
  -9   0   4    0.08    0.10
   8   0  -4  288.04    6.92
   8   0  -4  277.71    7.04
   8   0  -4  277.49    7.09
   8   0  -4  284.48    7.06
   8   0  -4  275.59    7.03
   8   0  -4  287.98    7.10
  -8   0   4  280.79    6.92
  -8   0   4  267.02    6.91
  -8   0   4  281.16    6.99
  -8   0   4  277.47    6.75
   7   0  -4   -0.05    0.10
   7   0  -4    0.06    0.09
   7   0  -4    0.11    0.13
   7   0  -4   -0.02    0.10
   7   0  -4   -0.09    0.07
  -7   0   4    0.06    0.07
  -7   0   4   -0.10    0.11
  -7   0   4   -0.32    0.12
  -7   0   4    0.07    0.05
  -7   0   4    0.02    0.09
   6   0  -4   59.95    1.56
   6   0  -4   62.44    1.65
   6   0  -4   60.07    1.66
   6   0  -4   63.56    1.66
  -6   0   4   59.90    1.63
  -6   0   4   60.65    1.50
  -6   0   4   58.38    1.59
   5   0  -4   -0.09    0.08
   5   0  -4   -0.13    0.05
   5   0  -4   -0.11    0.07
   5   0  -4   -0.02    0.06
  -5   0   4   -0.07    0.08
  -5   0   4    0.00    0.05
  -5   0   4   -0.03    0.09
  -5   0   4   -0.08    0.04
   4   0  -4   43.60    1.23
   4   0  -4   44.01    1.17
   4   0  -4   45.80    1.19
   4   0  -4   44.78    1.20
  -4   0   4   41.27    1.21
  -4   0   4   45.69    1.13
  -4   0   4   44.01    1.18
  -4   0   4   46.27    1.19
  -4   0   4   46.38    1.21
  -4   0   4   46.55    1.12
   3   0  -4   -0.02    0.05
   3   0  -4   -0.01    0.04
   3   0  -4   -0.04    0.06
   3   0  -4    0.00    0.03
   3   0  -4   -0.10    0.05
  -3   0   4   -0.04    0.05
  -3   0   4   -0.06    0.04
  -3   0   4   -0.06    0.03
  -3   0   4   -0.06    0.06
  -3   0   4   -0.01    0.02
   2   0  -4  173.10    4.52
   2   0  -4  187.68    4.49
   2   0  -4  187.61    4.52
   2   0  -4  176.03    4.52
   2   0  -4  187.42    4.53
  -2   0   4  193.59    4.53
  -2   0   4  182.51    4.49
  -2   0   4  181.64    4.43
  -2   0   4  173.11    4.53
   1   0  -4   -0.14    0.05
   1   0  -4   -0.22    0.05
   1   0  -4   -0.22    0.04
   1   0  -4   -0.20    0.04
   1   0  -4   -0.29    0.02
  -1   0   4   -0.30    0.04
  -1   0   4   -0.24    0.04
  -1   0   4   -0.26    0.03
  -1   0   4   -0.23    0.04
  -1   0   4   -0.29    0.05
   0   0  -4   -0.04    0.04
   0   0  -4    0.00    0.04
   0   0  -4    0.03    0.05
   0   0  -4    0.07    0.04
   0   0   4    0.02    0.03
   0   0   4    0.02    0.05
   0   0   4    0.07    0.04
   0   0   4    0.00    0.03
   0   0   4   -0.09    0.03
   0   0   4   -0.01    0.04
  -1   0  -4    0.03    0.06
  -1   0  -4    0.10    0.04
  -1   0  -4    0.01    0.06
  -1   0  -4   -0.05    0.04
  -1   0  -4   -0.03    0.04
   1   0   4    0.02    0.04
   1   0   4   -0.05    0.05
   1   0   4    0.04    0.05
   1   0   4    0.01    0.06
   1   0   4    0.04    0.04
  -2   0  -4  927.05   23.47
  -2   0  -4  953.11   23.77
  -2   0  -4  959.47   23.72
  -2   0  -4  966.23   23.64
  -2   0  -4  983.88   23.82
   2   0   4  950.23   23.46
   2   0   4  921.70   23.50
   2   0   4  955.88   23.74
   2   0   4  948.72   23.46
   2   0   4 1000.00   23.61
  -3   0  -4    0.00    0.09
  -3   0  -4   -0.12    0.08
  -3   0  -4   -0.07    0.06
  -3   0  -4   -0.06    0.07
  -3   0  -4   -0.09    0.06
  -3   0  -4   -0.01    0.06
   3   0   4   -0.04    0.08
   3   0   4    0.02    0.05
   3   0   4   -0.05    0.06
  -4   0  -4   24.22    0.70
  -4   0  -4   24.72    0.69
  -4   0  -4   22.82    0.73
  -4   0  -4   24.38    0.69
   4   0   4   24.72    0.76
   4   0   4   24.46    0.72
   4   0   4   23.53    0.76
   4   0   4   23.66    0.70
  -5   0  -4    0.05    0.09
  -5   0  -4    0.04    0.08
  -5   0  -4   -0.14    0.13
  -5   0  -4    0.00    0.11
  -5   0  -4   -0.02    0.08
  -5   0  -4    0.02    0.08
   5   0   4    0.00    0.09
   5   0   4    0.04    0.13
   5   0   4    0.09    0.11
   5   0   4   -0.12    0.09
  -6   0  -4   33.55    0.96
  -6   0  -4   33.93    0.94
  -6   0  -4   33.33    0.95
  -6   0  -4   33.10    0.99
  -6   0  -4   32.86    1.06
   6   0   4   33.01    0.96
   6   0   4   32.53    1.02
   6   0   4   32.60    1.03
  -7   0  -4    0.21    0.17
  -7   0  -4   -0.01    0.10
  -7   0  -4   -0.15    0.11
  -7   0  -4    0.04    0.14
  -7   0  -4    0.04    0.10
   7   0   4    0.18    0.16
   7   0   4   -0.03    0.09
   7   0   4    0.12    0.12
   7   0   4    0.00    0.16
  -8   0  -4    1.15    0.29
  -8   0  -4    1.05    0.16
  -8   0  -4    1.15    0.21
  -8   0  -4    1.36    0.16
   8   0   4    1.21    0.24
   8   0   4    1.23    0.25
   8   0   4    1.28    0.20
   8   0   4    1.42    0.23
   8   0   4    1.11    0.16
  -9   0  -4   -0.09    0.16
  -9   0  -4    0.14    0.14
  -9   0  -4   -0.07    0.16
  -9   0  -4    0.01    0.26
  -9   0  -4    0.02    0.12
   9   0   4   -0.29    0.20
   9   0   4    0.16    0.21
   9   0   4   -0.23    0.14
   9   0   4    0.29    0.19
 -10   0  -4    2.10    0.24
 -10   0  -4    2.22    0.25
 -10   0  -4    1.82    0.36
 -10   0  -4    1.75    0.28
  10   0   4    1.67    0.33
  10   0   4    2.06    0.35
  10   0   4    2.15    0.28
  10   0   4    2.25    0.23
 -11   0  -4    0.32    0.16
 -11   0  -4   -0.20    0.19
 -11   0  -4   -0.29    0.23
 -11   0  -4    0.14    0.18
 -11   0  -4   -0.60    0.34
  11   0   4    0.56    0.28
  11   0   4   -0.02    0.17
  11   0   4    0.10    0.23
  11   0   4   -0.09    0.29
  11   0   4    0.09    0.30
 -12   0  -4    7.05    0.38
 -12   0  -4    7.91    0.59
 -12   0  -4    7.60    0.45
 -12   0  -4    7.73    0.46
  12   0   4    7.66    0.64
  12   0   4    7.55    0.63
 -13   0  -4    0.12    0.25
 -13   0  -4   -0.18    0.18
 -13   0  -4   -0.05    0.29
 -13   0  -4    0.07    0.21
  13   0   4   -0.08    0.36
 -14   0  -4    2.60    0.35
 -14   0  -4    3.00    0.35
  14   0   4    2.50    0.56
  14   0   4    2.98    0.52
 -15   0  -4   -0.41    0.38
 -15   0  -4   -0.18    0.26
 -15   0  -4   -0.21    0.28
  15   0   4   -0.22    0.49
 -16   0  -4   -0.49    0.31
 -16   0  -4    1.01    0.47
  16   0   4   -0.90    0.53
  16   0   4   -0.01    0.57
 -17   0  -4    0.06    0.37
 -17   0  -4    0.77    0.57
  17   0   4   -0.56    0.60
  17   0   4    0.54    0.71
 -18   0  -4    0.89    0.68
 -18   0  -4    0.26    0.44
  18   0   4   -0.68    0.67
  18   0   4   -0.56    0.76
  20  -1  -4    1.99    0.72
  20  -1  -4    3.48    0.81
 -20   1   4    2.68    0.68
  19  -1  -4    0.66    0.64
  19  -1  -4    0.55    0.70
 -19   1   4    0.40    0.52
  18  -1  -4    0.60    0.58
  18  -1  -4   -0.59    0.54
 -18   1   4   -0.22    0.42
 -18   1   4    0.16    0.28
  17  -1  -4    0.26    0.34
  17  -1  -4    1.24    0.50
  17  -1  -4    0.61    0.51
 -17   1   4   -0.06    0.44
 -17   1   4    0.39    0.26
  16  -1  -4    1.89    0.33
  16  -1  -4    1.88    0.51
 -16   1   4    1.10    0.24
 -16   1   4    0.73    0.37
  15  -1  -4    1.03    0.26
  15  -1  -4    0.82    0.30
  15  -1  -4    1.47    0.39
  15  -1  -4    1.04    0.47
 -15   1   4    1.24    0.22
 -15   1   4    1.09    0.36
 -15   1   4    1.05    0.22
  14  -1  -4    0.96    0.43
  14  -1  -4    1.48    0.27
  14  -1  -4    0.91    0.24
  14  -1  -4    0.17    0.31
 -14   1   4    1.19    0.31
 -14   1   4    0.84    0.20
 -14   1   4    0.82    0.19
  13  -1  -4    0.22    0.29
  13  -1  -4    0.42    0.36
  13  -1  -4    0.54    0.20
  13  -1  -4    0.61    0.21
 -13   1   4    0.41    0.16
 -13   1   4    0.57    0.24
 -13   1   4    0.40    0.15
  12  -1  -4    4.34    0.49
  12  -1  -4    5.01    0.44
  12  -1  -4    3.92    0.29
  12  -1  -4    3.86    0.31
 -12   1   4    3.88    0.27
 -12   1   4    4.09    0.26
 -12   1   4    3.79    0.38
  11  -1  -4    4.03    0.49
  11  -1  -4    3.63    0.26
  11  -1  -4    4.14    0.27
  11  -1  -4    3.63    0.41
  11  -1  -4    3.65    0.38
 -11   1   4    3.46    0.23
 -11   1   4    3.60    0.22
 -11   1   4    3.44    0.36
  10  -1  -4    1.68    0.25
  10  -1  -4    2.32    0.19
  10  -1  -4    2.00    0.21
  10  -1  -4    1.39    0.28
 -10   1   4    1.74    0.25
   9  -1  -4    7.74    0.44
   9  -1  -4    6.71    0.46
   9  -1  -4    7.28    0.29
   9  -1  -4    7.65    0.41
  -9   1   4    7.70    0.27
  -9   1   4    7.58    0.31
  -9   1   4    7.63    0.42
   8  -1  -4   31.95    1.03
   8  -1  -4   31.55    0.86
   8  -1  -4   32.94    0.99
   8  -1  -4   32.31    1.09
  -8   1   4   32.27    0.99
  -8   1   4   31.51    0.83
  -8   1   4   31.00    0.88
   7  -1  -4    8.21    0.37
   7  -1  -4    8.61    0.47
   7  -1  -4    8.52    0.43
   7  -1  -4    8.91    0.31
   7  -1  -4    8.33    0.42
   7  -1  -4    8.31    0.27
  -7   1   4    8.35    0.37
  -7   1   4    8.24    0.31
  -7   1   4    8.25    0.26
   6  -1  -4    0.43    0.07
   6  -1  -4    0.39    0.05
   6  -1  -4    0.39    0.11
   6  -1  -4    0.29    0.13
  -6   1   4    0.65    0.16
  -6   1   4    0.49    0.06
  -6   1   4    0.50    0.11
  -6   1   4    0.44    0.09
   5  -1  -4    0.01    0.06
   5  -1  -4   -0.05    0.05
   5  -1  -4    0.03    0.11
   5  -1  -4    0.07    0.03
  -5   1   4   -0.04    0.06
  -5   1   4    0.01    0.08
  -5   1   4    0.06    0.04
  -5   1   4    0.18    0.10
   4  -1  -4    3.05    0.11
   4  -1  -4    2.97    0.15
   4  -1  -4    2.87    0.16
  -4   1   4    3.21    0.17
  -4   1   4    3.13    0.17
  -4   1   4    3.29    0.22
  -4   1   4    2.92    0.12
   3  -1  -4   57.01    1.46
   3  -1  -4   56.93    1.42
   3  -1  -4   56.23    1.52
   3  -1  -4   55.96    1.42
   3  -1  -4   55.93    1.53
   3  -1  -4   59.20    1.53
   3  -1  -4   56.70    1.49
  -3   1   4   56.01    1.51
  -3   1   4   56.54    1.52
  -3   1   4   55.21    1.48
  -3   1   4   56.31    1.45
   2  -1  -4    6.19    0.26
   2  -1  -4    6.85    0.28
   2  -1  -4    6.34    0.22
   2  -1  -4    6.44    0.21
   2  -1  -4    6.46    0.28
  -2   1   4    6.58    0.22
  -2   1   4    6.55    0.23
  -2   1   4    6.21    0.27
  -2   1   4    7.05    0.28
  -2   1   4    6.21    0.27
   1  -1  -4   19.70    0.59
   1  -1  -4   19.94    0.55
   1  -1  -4   19.70    0.60
   1  -1  -4   19.45    0.51
   1  -1  -4   18.61    0.59
  -1   1   4   19.48    0.59
  -1   1   4   20.30    0.61
  -1   1   4   19.54    0.52
  -1   1   4   19.63    0.57
  -1   1   4   20.45    0.61
   0  -1  -4   55.21    1.47
   0  -1  -4   54.21    1.35
   0  -1  -4   56.83    1.44
   0  -1  -4   51.22    1.41
   0  -1  -4   54.32    1.46
   0  -1  -4   54.79    1.46
   0  -1  -4   55.80    1.36
   0   1   4   52.36    1.46
   0   1   4   57.51    1.48
   0   1   4   55.42    1.42
   0   1   4   53.10    1.43
  -1  -1  -4  300.38    7.31
  -1  -1  -4  297.00    7.26
  -1  -1  -4  292.11    7.25
  -1  -1  -4  305.66    7.37
  -1  -1  -4  283.90    7.39
  -1  -1  -4  301.79    7.38
   1   1   4  284.24    7.06
   1   1   4  292.02    6.99
   1   1   4  277.60    7.12
   1   1   4  292.44    7.03
  -2  -1  -4  166.12    4.16
  -2  -1  -4  166.64    4.10
  -2  -1  -4  165.79    4.04
  -2  -1  -4  160.72    4.16
  -2  -1  -4  163.31    4.11
   2   1   4  164.53    4.04
   2   1   4  156.77    4.11
   2   1   4  162.12    3.98
   2   1   4  160.04    4.10
   2   1   4  164.60    4.04
  -3  -1  -4    4.31    0.25
  -3  -1  -4    4.25    0.23
  -3  -1  -4    4.47    0.24
  -3  -1  -4    4.32    0.18
   3   1   4    4.24    0.27
   3   1   4    4.58    0.19
   3   1   4    4.56    0.22
  -4  -1  -4   11.73    0.43
  -4  -1  -4   11.73    0.38
  -4  -1  -4   10.77    0.42
   4   1   4   10.53    0.45
   4   1   4   11.15    0.44
   4   1   4   10.94    0.43
   4   1   4   11.06    0.37
  -5  -1  -4   56.06    1.52
  -5  -1  -4   53.87    1.47
  -5  -1  -4   55.70    1.53
  -5  -1  -4   54.65    1.50
   5   1   4   53.48    1.44
   5   1   4   53.19    1.51
   5   1   4   54.72    1.56
   5   1   4   54.23    1.51
   5   1   4   54.75    1.49
  -6  -1  -4   52.22    1.41
  -6  -1  -4   53.11    1.47
  -6  -1  -4   51.34    1.47
  -6  -1  -4   49.51    1.43
   6   1   4   50.14    1.44
   6   1   4   50.48    1.39
   6   1   4   50.47    1.46
   6   1   4   51.29    1.43
   6   1   4   51.58    1.51
  -7  -1  -4    7.66    0.42
  -7  -1  -4    8.04    0.39
  -7  -1  -4    7.73    0.40
  -7  -1  -4    8.04    0.37
   7   1   4    7.72    0.37
   7   1   4    8.09    0.46
   7   1   4    7.66    0.41
   7   1   4    7.23    0.39
  -8  -1  -4    1.75    0.22
  -8  -1  -4    1.59    0.22
  -8  -1  -4    2.20    0.26
  -8  -1  -4    2.80    0.34
   8   1   4    1.44    0.23
   8   1   4    1.67    0.24
   8   1   4    1.76    0.22
   8   1   4    1.93    0.30
  -9  -1  -4   -0.15    0.20
  -9  -1  -4    0.25    0.17
  -9  -1  -4    0.23    0.26
  -9  -1  -4    0.43    0.18
   9   1   4    0.61    0.21
   9   1   4    0.29    0.20
   9   1   4    0.82    0.20
   9   1   4    0.32    0.23
 -10  -1  -4    4.26    0.38
 -10  -1  -4    4.99    0.35
 -10  -1  -4    4.73    0.51
 -10  -1  -4    3.89    0.38
  10   1   4    3.91    0.40
  10   1   4    4.73    0.44
  10   1   4    4.42    0.50
  10   1   4    4.17    0.40
 -11  -1  -4    0.31    0.19
 -11  -1  -4    0.15    0.24
 -11  -1  -4   -0.15    0.23
 -11  -1  -4   -0.42    0.31
  11   1   4    0.13    0.25
  11   1   4    0.18    0.30
  11   1   4    0.23    0.25
  11   1   4   -0.07    0.24
 -12  -1  -4   12.00    0.77
 -12  -1  -4   10.37    0.61
 -12  -1  -4   10.28    0.56
 -12  -1  -4   11.83    0.58
  12   1   4   11.96    0.62
  12   1   4   10.45    0.74
  12   1   4    9.81    0.67
 -13  -1  -4    0.09    0.31
 -13  -1  -4    0.17    0.24
 -13  -1  -4    0.16    0.49
 -13  -1  -4   -0.38    0.29
  13   1   4    0.40    0.37
  13   1   4    0.80    0.35
  13   1   4    0.73    0.32
 -14  -1  -4    4.81    0.48
 -14  -1  -4    4.64    0.57
 -14  -1  -4    3.68    0.42
  14   1   4    5.63    0.56
  14   1   4    4.91    0.61
  14   1   4    5.12    0.55
 -15  -1  -4    0.17    0.41
 -15  -1  -4    0.59    0.30
 -15  -1  -4    0.82    0.42
  15   1   4    0.41    0.39
  15   1   4   -0.26    0.41
  15   1   4   -0.13    0.49
 -16  -1  -4   -0.27    0.45
 -16  -1  -4    0.32    0.36
 -16  -1  -4   -0.54    0.45
  16   1   4   -0.45    0.39
  16   1   4   -0.72    0.48
  16   1   4   -1.20    0.53
 -17  -1  -4   -0.59    0.50
 -17  -1  -4    0.12    0.37
  17   1   4    0.08    0.61
 -18  -1  -4   -1.06    0.61
 -18  -1  -4   -0.53    0.40
  18   1   4    0.43    0.62
  18   1   4   -0.03    0.79
  19  -2  -4   -1.09    0.79
  19  -2  -4    0.63    0.67
 -19   2   4   -0.34    0.56
  18  -2  -4    2.07    0.70
  18  -2  -4    2.22    0.67
 -18   2   4    2.36    0.58
  17  -2  -4   -0.64    0.58
  17  -2  -4    0.37    0.52
 -17   2   4    0.21    0.46
 -17   2   4    0.19    0.29
  16  -2  -4    0.93    0.56
  16  -2  -4    0.60    0.37
  16  -2  -4    0.32    0.47
 -16   2   4    1.34    0.29
 -16   2   4    1.20    0.42
  15  -2  -4   -0.44    0.33
  15  -2  -4   -0.16    0.49
 -15   2   4    0.85    0.36
 -15   2   4    0.01    0.22
  14  -2  -4    0.37    0.43
  14  -2  -4    0.52    0.35
 -14   2   4   -0.01    0.19
 -14   2   4   -0.19    0.18
  13  -2  -4   -0.03    0.36
  13  -2  -4   -0.12    0.18
  13  -2  -4   -0.20    0.28
 -13   2   4    0.08    0.18
 -13   2   4   -0.05    0.16
 -13   2   4   -0.02    0.26
  12  -2  -4    0.38    0.15
  12  -2  -4    0.57    0.37
  12  -2  -4    0.31    0.29
 -12   2   4    0.71    0.17
 -12   2   4    0.72    0.26
  11  -2  -4    3.40    0.24
  11  -2  -4    3.06    0.45
  11  -2  -4    3.86    0.43
 -11   2   4    3.54    0.28
 -11   2   4    3.13    0.27
 -11   2   4    3.37    0.39
  10  -2  -4    3.62    0.40
  10  -2  -4    4.09    0.47
 -10   2   4    4.74    0.41
 -10   2   4    3.93    0.27
 -10   2   4    4.24    0.27
   9  -2  -4    0.30    0.21
   9  -2  -4    0.14    0.09
   9  -2  -4    0.32    0.24
  -9   2   4    0.04    0.12
  -9   2   4    0.46    0.19
   8  -2  -4    0.45    0.23
   8  -2  -4    0.24    0.19
   8  -2  -4    0.21    0.08
  -8   2   4    0.17    0.12
  -8   2   4    0.24    0.10
  -8   2   4    0.19    0.15
   7  -2  -4    2.35    0.28
   7  -2  -4    2.55    0.16
   7  -2  -4    1.77    0.27
  -7   2   4    2.40    0.22
  -7   2   4    2.48    0.18
  -7   2   4    2.91    0.28
   6  -2  -4    4.56    0.29
   6  -2  -4    4.79    0.20
   6  -2  -4    4.30    0.37
   6  -2  -4    4.22    0.32
  -6   2   4    4.68    0.30
  -6   2   4    4.53    0.27
  -6   2   4    4.57    0.37
  -6   2   4    4.59    0.23
   5  -2  -4    1.18    0.13
   5  -2  -4    1.20    0.20
   5  -2  -4    1.18    0.16
   5  -2  -4    1.42    0.21
  -5   2   4    1.10    0.20
  -5   2   4    1.04    0.20
  -5   2   4    1.47    0.17
  -5   2   4    1.14    0.13
  -5   2   4    1.21    0.17
   4  -2  -4   30.87    0.89
   4  -2  -4   30.72    0.83
   4  -2  -4   30.69    0.93
   4  -2  -4   29.33    0.87
   4  -2  -4   29.50    0.93
   4  -2  -4   27.58    0.90
   4  -2  -4   30.25    0.95
  -4   2   4   29.85    0.84
  -4   2   4   30.21    0.90
  -4   2   4   30.60    0.91
  -4   2   4   29.99    0.95
   3  -2  -4    0.14    0.09
   3  -2  -4    0.31    0.15
   3  -2  -4    0.08    0.09
   3  -2  -4    0.00    0.12
   3  -2  -4    0.29    0.14
   3  -2  -4    0.26    0.10
   3  -2  -4    0.22    0.09
  -3   2   4    0.14    0.12
   2  -2  -4    0.31    0.12
   2  -2  -4    0.17    0.12
   2  -2  -4    0.21    0.10
   2  -2  -4    0.14    0.10
   2  -2  -4    0.36    0.09
  -2   2   4    0.31    0.13
  -2   2   4    0.17    0.10
  -2   2   4    0.29    0.09
   1  -2  -4    0.25    0.08
   1  -2  -4    0.36    0.12
   1  -2  -4   -0.02    0.10
   1  -2  -4    0.09    0.11
   1  -2  -4    0.02    0.07
   1  -2  -4    0.14    0.10
  -1   2   4    0.00    0.10
  -1   2   4    0.09    0.13
   0  -2  -4    1.60    0.20
   0  -2  -4    1.84    0.20
   0  -2  -4    1.67    0.16
   0  -2  -4    1.79    0.17
   0  -2  -4    1.58    0.14
   0  -2  -4    1.61    0.19
   0  -2  -4    1.51    0.18
   0   2   4    1.69    0.21
   0   2   4    1.61    0.19
   0   2   4    1.63    0.17
  -1  -2  -4   16.64    0.58
  -1  -2  -4   15.43    0.58
  -1  -2  -4   15.40    0.58
  -1  -2  -4   16.17    0.50
  -1  -2  -4   15.67    0.51
   1   2   4   15.15    0.49
   1   2   4   15.73    0.51
   1   2   4   15.73    0.57
   1   2   4   15.95    0.58
  -2  -2  -4   11.46    0.47
  -2  -2  -4   11.59    0.39
  -2  -2  -4   12.13    0.49
  -2  -2  -4   11.53    0.40
   2   2   4   12.55    0.50
   2   2   4   12.10    0.42
   2   2   4   11.73    0.41
   2   2   4   11.80    0.50
  -3  -2  -4    6.02    0.36
  -3  -2  -4    5.73    0.26
  -3  -2  -4    5.89    0.26
  -3  -2  -4    6.72    0.36
  -3  -2  -4    6.02    0.35
   3   2   4    5.77    0.28
   3   2   4    5.73    0.34
   3   2   4    5.64    0.34
   3   2   4    5.61    0.26
  -4  -2  -4   19.17    0.73
  -4  -2  -4   17.79    0.58
  -4  -2  -4   18.10    0.66
   4   2   4   17.14    0.58
   4   2   4   17.15    0.55
   4   2   4   18.20    0.68
   4   2   4   17.80    0.67
  -5  -2  -4   12.53    0.46
  -5  -2  -4   12.50    0.46
  -5  -2  -4   12.85    0.58
  -5  -2  -4   13.05    0.54
   5   2   4   12.63    0.44
   5   2   4   11.80    0.53
   5   2   4   12.06    0.56
  -6  -2  -4    7.48    0.34
  -6  -2  -4    6.89    0.42
  -6  -2  -4    7.64    0.36
  -6  -2  -4    7.56    0.46
   6   2   4    7.35    0.42
   6   2   4    7.78    0.38
   6   2   4    6.95    0.46
  -7  -2  -4    5.30    0.40
  -7  -2  -4    6.01    0.38
  -7  -2  -4    5.71    0.33
   7   2   4    5.17    0.41
   7   2   4    5.89    0.44
   7   2   4    5.93    0.32
   7   2   4    5.02    0.36
  -8  -2  -4    0.35    0.21
  -8  -2  -4   -0.11    0.23
  -8  -2  -4    0.18    0.20
  -8  -2  -4    0.08    0.15
   8   2   4   -0.05    0.18
   8   2   4    0.08    0.21
   8   2   4   -0.02    0.20
   8   2   4    0.32    0.16
  -9  -2  -4    0.21    0.18
  -9  -2  -4    0.20    0.19
  -9  -2  -4    0.15    0.23
  -9  -2  -4    0.05    0.22
   9   2   4    0.42    0.21
   9   2   4    0.54    0.28
   9   2   4    0.23    0.18
   9   2   4   -0.08    0.20
 -10  -2  -4   -0.33    0.29
 -10  -2  -4    0.13    0.19
 -10  -2  -4   -0.29    0.21
 -10  -2  -4    0.16    0.26
  10   2   4   -0.49    0.23
  10   2   4   -0.39    0.25
  10   2   4   -0.02    0.18
  10   2   4   -0.29    0.28
 -11  -2  -4    0.64    0.31
 -11  -2  -4    0.13    0.30
 -11  -2  -4    0.92    0.37
 -11  -2  -4    0.69    0.25
  11   2   4    1.04    0.39
  11   2   4    1.11    0.27
  11   2   4    0.35    0.30
  11   2   4    0.26    0.32
 -12  -2  -4    0.10    0.36
 -12  -2  -4    0.22    0.27
 -12  -2  -4    0.26    0.35
 -12  -2  -4    0.27    0.28
  12   2   4   -0.38    0.34
  12   2   4    0.11    0.25
  12   2   4   -0.15    0.32
 -13  -2  -4    9.94    0.67
 -13  -2  -4   12.24    0.67
  13   2   4   10.92    0.63
  13   2   4    8.52    0.71
  13   2   4    9.55    0.78
 -14  -2  -4    1.34    0.55
 -14  -2  -4    1.25    0.38
 -14  -2  -4    0.82    0.40
  14   2   4    0.68    0.43
  14   2   4    1.00    0.37
  14   2   4    0.38    0.46
 -15  -2  -4    0.56    0.38
 -15  -2  -4    0.22    0.45
  15   2   4   -0.34    0.54
  15   2   4    0.71    0.40
  15   2   4    1.32    0.53
 -16  -2  -4    1.18    0.42
 -16  -2  -4    0.82    0.49
  16   2   4    1.77    0.57
  16   2   4    1.03    0.68
  16   2   4    0.91    0.46
 -17  -2  -4    0.15    0.44
 -17  -2  -4    0.57    0.54
  17   2   4   -0.60    0.68
  17   2   4    0.25    0.60
  18  -3  -4    1.33    0.79
  18  -3  -4    0.38    0.63
 -18   3   4    0.24    0.58
  17  -3  -4    0.79    0.63
  17  -3  -4    1.31    0.68
 -17   3   4    0.62    0.52
  16  -3  -4    0.49    0.51
  16  -3  -4    0.21    0.64
 -16   3   4    1.45    0.48
 -16   3   4    0.60    0.34
  15  -3  -4    0.33    0.57
  15  -3  -4    0.93    0.51
 -15   3   4    0.18    0.30
 -15   3   4    0.79    0.41
  14  -3  -4    1.60    0.18
  14  -3  -4    1.40    0.53
  14  -3  -4    1.83    0.23
  14  -3  -4    0.41    0.42
 -14   3   4    1.64    0.40
 -14   3   4    0.74    0.29
  13  -3  -4   -0.48    0.44
  13  -3  -4    0.10    0.19
  13  -3  -4    0.12    0.36
  13  -3  -4   -0.08    0.16
 -13   3   4    0.43    0.36
 -13   3   4    0.04    0.24
  12  -3  -4    5.60    0.35
  12  -3  -4    5.62    0.40
  12  -3  -4    5.22    0.61
  12  -3  -4    6.18    0.68
 -12   3   4    6.08    0.43
 -12   3   4    6.09    0.57
  11  -3  -4    3.60    0.29
  11  -3  -4    3.07    0.42
  11  -3  -4    3.56    0.55
  11  -3  -4    3.37    0.26
 -11   3   4    3.09    0.34
 -11   3   4    3.07    0.44
  10  -3  -4    8.03    0.59
  10  -3  -4    8.44    0.36
  10  -3  -4    7.85    0.37
  10  -3  -4    8.71    0.42
  10  -3  -4    8.23    0.67
 -10   3   4    8.11    0.44
 -10   3   4    7.57    0.54
   9  -3  -4   24.85    0.75
   9  -3  -4   24.90    0.96
   9  -3  -4   24.08    0.76
   9  -3  -4   26.60    0.81
   9  -3  -4   24.24    1.04
  -9   3   4   24.88    0.82
  -9   3   4   25.15    0.96
   8  -3  -4    5.79    0.41
   8  -3  -4    6.04    0.35
   8  -3  -4    5.62    0.53
   8  -3  -4    6.27    0.32
   8  -3  -4    5.35    0.47
   8  -3  -4    6.04    0.31
  -8   3   4    5.43    0.45
  -8   3   4    5.61    0.50
  -8   3   4    5.42    0.34
   7  -3  -4    3.02    0.24
   7  -3  -4    3.03    0.33
   7  -3  -4    2.98    0.28
   7  -3  -4    2.26    0.37
   7  -3  -4    2.45    0.35
   7  -3  -4    2.41    0.33
   7  -3  -4    2.19    0.23
   7  -3  -4    3.28    0.37
  -7   3   4    2.63    0.27
  -7   3   4    3.25    0.39
  -7   3   4    2.55    0.32
   6  -3  -4    5.82    0.42
   6  -3  -4    6.18    0.37
   6  -3  -4    5.99    0.32
   6  -3  -4    6.36    0.51
   6  -3  -4    5.83    0.34
   6  -3  -4    6.11    0.34
  -6   3   4    5.99    0.42
  -6   3   4    6.10    0.34
   5  -3  -4    1.07    0.28
   5  -3  -4    1.40    0.24
   5  -3  -4    1.32    0.21
   5  -3  -4    1.54    0.22
   5  -3  -4    1.40    0.24
   5  -3  -4    1.33    0.18
   5  -3  -4    1.53    0.21
  -5   3   4    1.42    0.26
  -5   3   4    1.46    0.21
  -5   3   4    1.35    0.22
   4  -3  -4    0.12    0.18
   4  -3  -4    0.01    0.14
   4  -3  -4    0.19    0.15
   4  -3  -4    0.01    0.14
   4  -3  -4   -0.13    0.18
   4  -3  -4   -0.04    0.19
   4  -3  -4   -0.09    0.20
   4  -3  -4    0.13    0.16
   4  -3  -4    0.16    0.16
  -4   3   4    0.02    0.14
  -4   3   4    0.22    0.16
  -4   3   4   -0.02    0.12
   3  -3  -4    0.26    0.16
   3  -3  -4    0.02    0.15
   3  -3  -4   -0.01    0.16
   3  -3  -4   -0.04    0.15
   3  -3  -4    0.17    0.19
   3  -3  -4    0.19    0.16
   3  -3  -4    0.13    0.17
   3  -3  -4    0.20    0.17
  -3   3   4    0.18    0.17
  -3   3   4    0.10    0.15
   2  -3  -4   -0.18    0.14
   2  -3  -4    0.10    0.14
   2  -3  -4   -0.08    0.15
   2  -3  -4   -0.07    0.14
   2  -3  -4   -0.01    0.15
   2  -3  -4   -0.09    0.14
   2  -3  -4   -0.06    0.16
   2  -3  -4    0.31    0.18
  -2   3   4   -0.15    0.14
  -2   3   4   -0.06    0.15
   1  -3  -4    0.55    0.17
   1  -3  -4    0.03    0.16
   1  -3  -4    0.26    0.14
   1  -3  -4    0.28    0.18
   1  -3  -4    0.41    0.17
   1  -3  -4    0.16    0.18
   1  -3  -4    0.30    0.15
  -1   3   4    0.28    0.17
  -1   3   4    0.45    0.15
  -1   3   4    0.50    0.19
   0  -3  -4   11.45    0.53
   0  -3  -4   11.96    0.50
   0  -3  -4   12.29    0.54
   0  -3  -4   12.26    0.49
   0  -3  -4   12.35    0.48
   0   3   4   12.73    0.54
   0   3   4   11.55    0.53
   0   3   4   11.61    0.48
  -1  -3  -4   19.56    0.68
  -1  -3  -4   20.54    0.65
  -1  -3  -4   20.18    0.77
  -1  -3  -4   19.74    0.75
  -1  -3  -4   20.04    0.75
   1   3   4   19.93    0.75
   1   3   4   19.11    0.65
   1   3   4   18.50    0.71
  -2  -3  -4    0.68    0.22
  -2  -3  -4    0.49    0.20
  -2  -3  -4    1.02    0.15
  -2  -3  -4    1.03    0.17
   2   3   4    0.77    0.22
   2   3   4    0.81    0.22
  -3  -3  -4    0.72    0.20
  -3  -3  -4    0.34    0.14
  -3  -3  -4    0.34    0.12
   3   3   4    0.47    0.19
   3   3   4    0.45    0.16
   3   3   4    0.37    0.11
   3   3   4    0.38    0.19
  -4  -3  -4    1.25    0.15
  -4  -3  -4    1.35    0.18
  -4  -3  -4    1.28    0.27
   4   3   4    1.01    0.27
   4   3   4    1.20    0.15
   4   3   4    1.19    0.27
   4   3   4    1.16    0.21
  -5  -3  -4    2.44    0.32
  -5  -3  -4    2.77    0.27
  -5  -3  -4    2.73    0.23
   5   3   4    2.75    0.21
   5   3   4    2.97    0.36
   5   3   4    2.68    0.33
   5   3   4    3.28    0.39
  -6  -3  -4    7.57    0.34
  -6  -3  -4    7.14    0.40
  -6  -3  -4    7.38    0.50
   6   3   4    7.56    0.45
   6   3   4    7.22    0.49
   6   3   4    7.57    0.32
   6   3   4    8.04    0.53
  -7  -3  -4    6.77    0.40
  -7  -3  -4    6.50    0.36
  -7  -3  -4    7.30    0.49
   7   3   4    7.46    0.48
   7   3   4    7.04    0.50
   7   3   4    6.50    0.31
   7   3   4    7.34    0.55
  -8  -3  -4   -0.26    0.23
  -8  -3  -4   -0.09    0.17
  -8  -3  -4    0.00    0.18
   8   3   4    0.09    0.27
   8   3   4   -0.11    0.23
   8   3   4    0.25    0.28
  -9  -3  -4    0.14    0.27
  -9  -3  -4    0.54    0.22
   9   3   4    0.84    0.33
   9   3   4    0.43    0.17
   9   3   4    0.14    0.31
   9   3   4    0.74    0.34
 -10  -3  -4    0.38    0.24
 -10  -3  -4    0.71    0.34
 -10  -3  -4    0.48    0.25
  10   3   4    1.03    0.40
  10   3   4    0.60    0.34
  10   3   4    0.73    0.20
  10   3   4    0.82    0.38
 -11  -3  -4    1.77    0.34
 -11  -3  -4    2.03    0.32
  11   3   4    1.32    0.46
  11   3   4    1.89    0.26
  11   3   4    1.33    0.45
  11   3   4    1.26    0.42
 -12  -3  -4    0.09    0.33
 -12  -3  -4   -0.04    0.28
 -12  -3  -4    0.13    0.33
  12   3   4    0.22    0.23
  12   3   4   -0.53    0.35
  12   3   4   -0.20    0.41
 -13  -3  -4    0.72    0.36
 -13  -3  -4    0.81    0.36
  13   3   4    0.98    0.51
  13   3   4    1.08    0.30
 -14  -3  -4    0.41    0.41
 -14  -3  -4   -0.44    0.40
  14   3   4   -0.39    0.51
  14   3   4   -0.88    0.47
 -15  -3  -4    0.76    0.49
 -15  -3  -4    0.99    0.49
  15   3   4    1.22    0.62
  15   3   4   -0.09    0.54
 -16  -3  -4   -1.33    0.47
 -16  -3  -4    0.49    0.51
  16   3   4   -0.70    0.68
  16   3   4   -0.05    0.67
  17  -4  -4    1.43    0.85
  17  -4  -4   -0.93    0.62
 -17   4   4    0.49    0.60
  16  -4  -4   -0.18    0.70
  16  -4  -4    0.91    0.65
 -16   4   4    0.80    0.57
  15  -4  -4   -0.30    0.58
  15  -4  -4   -0.51    0.53
 -15   4   4    0.55    0.53
 -15   4   4    0.40    0.40
  14  -4  -4    0.21    0.48
  14  -4  -4    0.63    0.59
 -14   4   4   -0.29    0.36
 -14   4   4    0.78    0.47
  13  -4  -4    0.06    0.27
  13  -4  -4    0.38    0.44
  13  -4  -4    1.50    0.60
 -13   4   4    0.16    0.32
 -13   4   4    1.26    0.44
  12  -4  -4    2.24    0.61
  12  -4  -4    1.49    0.21
  12  -4  -4    1.21    0.43
  12  -4  -4    2.29    0.30
 -12   4   4    1.29    0.43
 -12   4   4    1.60    0.33
  11  -4  -4   -0.15    0.18
  11  -4  -4    0.07    0.23
  11  -4  -4   -0.38    0.45
  11  -4  -4    0.06    0.35
  11  -4  -4    0.00    0.26
 -11   4   4   -0.12    0.26
  10  -4  -4    1.55    0.31
  10  -4  -4    1.52    0.22
  10  -4  -4    1.09    0.50
  10  -4  -4    1.40    0.25
  10  -4  -4    1.42    0.40
 -10   4   4    1.68    0.40
 -10   4   4    1.40    0.30
   9  -4  -4    3.34    0.34
   9  -4  -4    3.39    0.35
   9  -4  -4    3.57    0.43
   9  -4  -4    3.66    0.56
  -9   4   4    3.75    0.42
  -9   4   4    3.03    0.41
   8  -4  -4    0.44    0.34
   8  -4  -4    0.59    0.35
   8  -4  -4    0.36    0.27
   8  -4  -4    0.18    0.24
   8  -4  -4    0.53    0.20
   8  -4  -4    0.45    0.20
  -8   4   4    0.48    0.24
  -8   4   4    0.31    0.28
   7  -4  -4    4.35    0.49
   7  -4  -4    4.50    0.51
   7  -4  -4    3.76    0.41
   7  -4  -4    4.61    0.54
   7  -4  -4    3.72    0.36
   7  -4  -4    4.26    0.36
  -7   4   4    3.79    0.41
  -7   4   4    4.58    0.48
   6  -4  -4    0.32    0.22
   6  -4  -4    0.31    0.24
   6  -4  -4    0.28    0.30
   6  -4  -4    0.16    0.23
   6  -4  -4    0.01    0.20
   6  -4  -4    0.26    0.27
   6  -4  -4    0.15    0.25
  -6   4   4    0.31    0.23
  -6   4   4    0.11    0.22
   5  -4  -4   16.37    0.73
   5  -4  -4   14.51    0.65
   5  -4  -4   13.61    0.66
   5  -4  -4   14.00    0.68
   5  -4  -4   15.11    0.70
   5  -4  -4   14.82    0.64
   5  -4  -4   14.18    0.70
   5  -4  -4   15.45    0.78
  -5   4   4   15.45    0.67
  -5   4   4   16.23    0.72
   4  -4  -4    0.59    0.24
   4  -4  -4    1.10    0.25
   4  -4  -4    1.34    0.30
   4  -4  -4    1.38    0.25
   4  -4  -4    0.87    0.28
   4  -4  -4    1.34    0.29
   4  -4  -4    1.36    0.32
   4  -4  -4    1.43    0.29
  -4   4   4    1.43    0.28
   3  -4  -4   -0.05    0.24
   3  -4  -4    0.49    0.22
   3  -4  -4   -0.17    0.24
   3  -4  -4    0.30    0.24
   3  -4  -4   -0.01    0.23
   3  -4  -4   -0.29    0.23
   3  -4  -4    0.21    0.25
   3  -4  -4   -0.04    0.22
   3  -4  -4    0.22    0.23
   3  -4  -4    0.33    0.26
   2  -4  -4    2.17    0.29
   2  -4  -4    1.96    0.31
   2  -4  -4    2.09    0.33
   2  -4  -4    1.76    0.32
   2  -4  -4    2.49    0.36
   2  -4  -4    1.98    0.31
   2  -4  -4    1.97    0.34
   2  -4  -4    1.61    0.31
  -2   4   4    2.09    0.30
  -2   4   4    2.10    0.30
  -2   4   4    1.85    0.27
   1  -4  -4   15.09    0.70
   1  -4  -4   16.87    0.73
   1  -4  -4   16.55    0.78
   1  -4  -4   16.91    0.75
   1  -4  -4   16.90    0.68
   1  -4  -4   15.40    0.74
   1  -4  -4   17.10    0.72
   1  -4  -4   16.73    0.73
   1  -4  -4   15.71    0.66
  -1   4   4   16.83    0.68
  -1   4   4   16.28    0.71
  -1   4   4   17.11    0.74
   0  -4  -4    3.33    0.38
   0  -4  -4    3.81    0.38
   0  -4  -4    3.56    0.40
   0  -4  -4    3.37    0.42
   0  -4  -4    3.64    0.42
   0  -4  -4    3.21    0.33
   0   4   4    3.63    0.41
   0   4   4    3.63    0.38
   0   4   4    3.42    0.33
  -1  -4  -4    1.90    0.23
  -1  -4  -4    1.57    0.31
  -1  -4  -4    1.64    0.29
  -1  -4  -4    1.71    0.31
  -1  -4  -4    1.78    0.29
   1   4   4    1.51    0.21
   1   4   4    1.87    0.31
   1   4   4    1.15    0.28
  -2  -4  -4    1.08    0.19
  -2  -4  -4    0.41    0.23
  -2  -4  -4    1.20    0.30
  -2  -4  -4    0.79    0.28
   2   4   4    1.04    0.27
   2   4   4    1.07    0.19
   2   4   4    0.59    0.24
   2   4   4    1.05    0.32
  -3  -4  -4   30.75    1.13
  -3  -4  -4   29.22    1.00
  -3  -4  -4   30.12    0.91
  -3  -4  -4   30.57    1.09
   3   4   4   29.77    0.91
   3   4   4   30.26    1.11
   3   4   4   30.86    1.10
   3   4   4   29.10    1.02
  -4  -4  -4    0.87    0.24
  -4  -4  -4    0.48    0.15
  -4  -4  -4    0.75    0.29
   4   4   4    0.66    0.28
   4   4   4    0.42    0.16
   4   4   4    0.29    0.25
   4   4   4    0.57    0.27
  -5  -4  -4   11.06    0.56
  -5  -4  -4   10.51    0.69
  -5  -4  -4   10.88    0.43
   5   4   4   10.68    0.65
   5   4   4   10.36    0.65
   5   4   4   10.56    0.62
   5   4   4   10.51    0.40
  -6  -4  -4    7.64    0.35
  -6  -4  -4    7.86    0.60
  -6  -4  -4    8.15    0.51
   6   4   4    7.36    0.59
   6   4   4    7.94    0.63
   6   4   4    7.50    0.57
   6   4   4    7.30    0.32
  -7  -4  -4    8.30    0.36
  -7  -4  -4    8.62    0.52
  -7  -4  -4    8.67    0.62
   7   4   4    7.99    0.32
   7   4   4    8.66    0.69
   7   4   4    7.73    0.62
   7   4   4    7.54    0.62
  -8  -4  -4    2.79    0.34
  -8  -4  -4    2.32    0.25
  -8  -4  -4    2.62    0.44
   8   4   4    2.52    0.41
   8   4   4    2.70    0.20
   8   4   4    3.31    0.48
   8   4   4    3.14    0.47
  -9  -4  -4    0.20    0.27
  -9  -4  -4    0.29    0.33
  -9  -4  -4    0.13    0.15
   9   4   4    0.39    0.11
   9   4   4    0.45    0.41
 -10  -4  -4    0.62    0.39
 -10  -4  -4    0.37    0.29
  10   4   4    0.35    0.41
  10   4   4    0.23    0.39
  10   4   4    0.21    0.12
 -11  -4  -4    0.83    0.43
 -11  -4  -4    0.77    0.35
  11   4   4    0.46    0.45
  11   4   4    0.53    0.49
 -12  -4  -4    0.09    0.38
 -12  -4  -4   -0.12    0.45
  12   4   4   -0.09    0.47
  12   4   4   -0.30    0.54
 -13  -4  -4    2.00    0.49
 -13  -4  -4    1.36    0.45
  13   4   4    0.93    0.63
  13   4   4    0.88    0.63
 -14  -4  -4    0.17    0.49
 -14  -4  -4   -0.16    0.41
  14   4   4    0.03    0.65
  14   4   4    0.18    0.63
 -15  -4  -4    1.47    0.56
 -15  -4  -4    0.56    0.61
  15   4   4    2.24    0.74
  15   4   4    0.19    0.70
  15  -5  -4    0.15    0.83
  15  -5  -4   -0.24    0.65
 -15   5   4   -0.22    0.71
  14  -5  -4   -0.98    0.71
  14  -5  -4   -0.88    0.58
 -14   5   4    0.43    0.46
 -14   5   4   -0.51    0.53
  13  -5  -4   -0.22    0.56
  13  -5  -4    0.15    0.72
 -13   5   4    0.83    0.44
 -13   5   4    0.25    0.54
  12  -5  -4    0.48    0.67
  12  -5  -4   -0.11    0.25
  12  -5  -4    0.48    0.49
 -12   5   4   -0.26    0.45
 -12   5   4    0.11    0.38
  11  -5  -4    5.34    0.75
  11  -5  -4    4.98    0.45
 -11   5   4    5.57    0.69
 -11   5   4    5.93    0.64
  10  -5  -4   -0.16    0.42
  10  -5  -4    0.78    0.35
  10  -5  -4   -1.05    0.51
  10  -5  -4   -0.05    0.24
  10  -5  -4    0.06    0.38
 -10   5   4    0.25    0.39
 -10   5   4    0.08    0.36
   9  -5  -4    4.30    0.44
   9  -5  -4    3.51    0.66
   9  -5  -4    4.66    0.56
   9  -5  -4    4.87    0.49
   9  -5  -4    3.80    0.43
  -9   5   4    3.57    0.54
  -9   5   4    5.20    0.59
   8  -5  -4    0.46    0.29
   8  -5  -4   -0.11    0.32
   8  -5  -4    0.58    0.39
   8  -5  -4    0.88    0.38
   8  -5  -4    0.80    0.51
  -8   5   4    1.10    0.36
  -8   5   4    1.01    0.37
   7  -5  -4    3.11    0.55
   7  -5  -4    3.02    0.45
   7  -5  -4    3.56    0.41
   7  -5  -4    3.87    0.51
   7  -5  -4    3.61    0.60
   7  -5  -4    3.09    0.40
   7  -5  -4    2.31    0.49
  -7   5   4    3.34    0.48
  -7   5   4    3.49    0.43
   6  -5  -4    1.48    0.37
   6  -5  -4    1.47    0.39
   6  -5  -4    1.32    0.44
   6  -5  -4    0.90    0.40
   6  -5  -4    1.14    0.32
   6  -5  -4    1.82    0.50
   6  -5  -4    1.78    0.39
   6  -5  -4    1.19    0.39
   5  -5  -4    0.04    0.32
   5  -5  -4    0.66    0.37
   5  -5  -4   -0.29    0.27
   5  -5  -4   -0.08    0.35
   5  -5  -4   -0.05    0.35
   5  -5  -4    0.33    0.40
   4  -5  -4    2.96    0.45
   4  -5  -4    3.70    0.48
   4  -5  -4    3.13    0.48
   4  -5  -4    2.60    0.41
   4  -5  -4    2.71    0.47
   4  -5  -4    2.63    0.45
   3  -5  -4    0.58    0.32
   3  -5  -4    0.13    0.34
   3  -5  -4    0.23    0.35
   3  -5  -4   -0.06    0.34
   3  -5  -4    0.52    0.40
   3  -5  -4   -0.15    0.33
   3  -5  -4   -0.55    0.30
   3  -5  -4    0.19    0.33
   3  -5  -4   -0.52    0.35
   2  -5  -4   -0.02    0.33
   2  -5  -4   -0.06    0.31
   2  -5  -4    0.14    0.32
   2  -5  -4    0.01    0.36
   2  -5  -4   -0.44    0.34
   2  -5  -4    0.15    0.35
   2  -5  -4    0.17    0.34
   2  -5  -4    0.14    0.31
  -2   5   4   -0.18    0.27
   1  -5  -4    8.62    0.58
   1  -5  -4    9.27    0.64
   1  -5  -4    8.44    0.65
   1  -5  -4    7.84    0.68
   1  -5  -4    9.09    0.64
   1  -5  -4    8.94    0.64
  -1   5   4    8.50    0.63
  -1   5   4    8.13    0.60
   0  -5  -4    1.98    0.32
   0  -5  -4    2.06    0.37
   0  -5  -4    1.61    0.35
   0  -5  -4    1.76    0.39
   0  -5  -4    1.71    0.39
   0   5   4    1.31    0.36
   0   5   4    1.26    0.35
  -1  -5  -4    4.33    0.52
  -1  -5  -4    4.21    0.52
  -1  -5  -4    3.84    0.42
  -1  -5  -4    4.44    0.50
  -1  -5  -4    3.93    0.45
   1   5   4    4.67    0.51
   1   5   4    4.55    0.57
  -2  -5  -4   -0.30    0.34
  -2  -5  -4    0.20    0.29
  -2  -5  -4    0.02    0.22
  -2  -5  -4    0.24    0.32
  -2  -5  -4    0.28    0.26
   2   5   4    0.22    0.33
   2   5   4   -0.54    0.30
  -3  -5  -4    2.42    0.31
  -3  -5  -4    2.09    0.43
  -3  -5  -4    2.30    0.40
  -3  -5  -4    2.10    0.38
  -3  -5  -4    2.08    0.28
   3   5   4    2.59    0.43
   3   5   4    2.42    0.41
   3   5   4    2.29    0.42
  -4  -5  -4    0.49    0.29
  -4  -5  -4    0.34    0.38
  -4  -5  -4    0.35    0.19
   4   5   4   -0.64    0.37
   4   5   4    0.18    0.34
   4   5   4    0.55    0.35
  -5  -5  -4    0.43    0.29
  -5  -5  -4    0.31    0.17
  -5  -5  -4    0.36    0.18
   5   5   4   -0.04    0.37
   5   5   4    0.04    0.34
  -6  -5  -4   -0.42    0.37
  -6  -5  -4    0.04    0.13
  -6  -5  -4   -0.10    0.30
  -6  -5  -4    0.02    0.13
   6   5   4   -0.45    0.42
   6   5   4    0.45    0.42
  -7  -5  -4    2.86    0.53
  -7  -5  -4    2.31    0.39
   7   5   4    2.59    0.53
   7   5   4    1.89    0.50
  -8  -5  -4   -0.08    0.31
  -8  -5  -4   -0.25    0.48
   8   5   4   -0.37    0.44
   8   5   4   -0.15    0.38
  -9  -5  -4   -0.09    0.35
  -9  -5  -4    0.94    0.48
   9   5   4    0.02    0.46
   9   5   4    0.22    0.49
 -10  -5  -4    0.37    0.53
 -10  -5  -4   -0.32    0.38
  10   5   4    0.05    0.53
  10   5   4   -0.71    0.49
 -11  -5  -4    0.97    0.61
  11   5   4    0.70    0.60
  11   5   4   -0.27    0.65
 -12  -5  -4   -0.30    0.53
 -12  -5  -4    0.85    0.47
  12   5   4   -0.79    0.56
  12   5   4    0.28    0.68
 -13  -5  -4   -0.54    0.60
 -13  -5  -4   -0.97    0.50
  13   5   4   -0.11    0.67
  13   5   4    1.28    0.78
  13  -6  -4    0.57    0.69
  13  -6  -4    0.91    0.85
 -13   6   4    0.67    0.67
  12  -6  -4   -0.19    0.68
  12  -6  -4    0.09    0.62
 -12   6   4    0.84    0.65
  11  -6  -4    0.20    0.81
  11  -6  -4   -0.46    0.58
  11  -6  -4   -1.30    0.76
 -11   6   4    0.13    0.62
  10  -6  -4    0.51    0.68
  10  -6  -4    0.31    0.66
  10  -6  -4    0.16    0.56
  10  -6  -4   -0.06    0.37
  10  -6  -4    0.52    0.75
 -10   6   4    1.16    0.58
 -10   6   4    0.31    0.53
   9  -6  -4    1.11    0.67
   9  -6  -4   -0.38    0.50
   9  -6  -4    0.04    0.69
   9  -6  -4    0.22    0.40
   9  -6  -4    0.64    0.59
   8  -6  -4    1.83    0.67
   8  -6  -4    0.70    0.51
   8  -6  -4   -0.03    0.55
   8  -6  -4    1.30    0.44
   8  -6  -4    1.47    0.66
   7  -6  -4    0.29    0.49
   7  -6  -4    0.51    0.62
   7  -6  -4   -0.46    0.58
   7  -6  -4   -0.34    0.45
   7  -6  -4   -0.54    0.41
   6  -6  -4    0.44    0.47
   6  -6  -4    0.61    0.58
   6  -6  -4    0.65    0.53
   6  -6  -4    0.30    0.42
   5  -6  -4    0.42    0.52
   5  -6  -4    1.28    0.58
   5  -6  -4    1.28    0.46
   5  -6  -4    1.30    0.47
   4  -6  -4    1.80    0.57
   4  -6  -4    1.68    0.53
   4  -6  -4    1.72    0.52
   4  -6  -4    2.48    0.50
   4  -6  -4    1.69    0.52
   3  -6  -4    2.79    0.55
   3  -6  -4    2.84    0.55
   3  -6  -4    3.25    0.56
   3  -6  -4    2.94    0.58
   2  -6  -4   -0.31    0.39
   2  -6  -4   -0.61    0.43
   2  -6  -4   -0.10    0.42
   2  -6  -4   -0.01    0.48
   2  -6  -4   -0.04    0.43
   1  -6  -4    0.18    0.42
   1  -6  -4    0.48    0.39
   1  -6  -4    0.36    0.52
   1  -6  -4    0.11    0.50
   1  -6  -4    0.02    0.42
  -1   6   4    0.35    0.39
   0  -6  -4   -0.05    0.46
   0  -6  -4   -0.10    0.40
   0  -6  -4    1.05    0.52
   0  -6  -4    0.66    0.45
   0   6   4    0.36    0.44
   0   6   4    0.54    0.39
  -1  -6  -4   -0.13    0.45
  -1  -6  -4    0.24    0.46
  -1  -6  -4    0.67    0.44
  -1  -6  -4    0.34    0.36
  -1  -6  -4    0.14    0.35
   1   6   4   -0.52    0.37
   1   6   4   -0.24    0.39
  -2  -6  -4    0.29    0.34
  -2  -6  -4    0.03    0.42
  -2  -6  -4    0.38    0.35
  -2  -6  -4    0.46    0.50
   2   6   4    1.01    0.43
   2   6   4   -0.13    0.38
  -3  -6  -4    0.41    0.43
  -3  -6  -4    1.17    0.34
  -3  -6  -4    2.11    0.60
   3   6   4    0.96    0.46
   3   6   4    1.74    0.45
  -4  -6  -4   -0.07    0.27
  -4  -6  -4    0.21    0.40
  -4  -6  -4    0.35    0.55
   4   6   4    0.28    0.47
  -5  -6  -4    2.65    0.49
  -5  -6  -4    3.15    0.67
   5   6   4    2.85    0.59
   5   6   4    2.91    0.57
  -6  -6  -4    1.03    0.62
  -6  -6  -4    1.07    0.44
   6   6   4    1.61    0.55
   6   6   4    1.61    0.56
  -7  -6  -4    0.09    0.60
  -7  -6  -4    0.63    0.47
   7   6   4    0.12    0.62
   7   6   4    0.61    0.54
  -8  -6  -4   -1.18    0.51
   8   6   4    0.60    0.55
   8   6   4    0.34    0.60
  -9  -6  -4   -0.24    0.55
  -9  -6  -4    0.25    0.48
   9   6   4    1.24    0.68
   9   6   4    0.49    0.66
 -10  -6  -4    0.08    0.52
 -10  -6  -4    0.55    0.63
  10   6   4    0.29    0.73
  10   6   4    0.31    0.66
 -11  -6  -4   -0.40    0.63
 -11  -6  -4    0.08    0.52
  11   6   4    0.77    0.87
  11   6   4    0.88    0.77
   9  -7  -4   -1.40    0.79
   9  -7  -4    0.24    0.95
   9  -7  -4    0.19    0.87
   9  -7  -4    0.76    0.69
   8  -7  -4    0.26    0.81
   8  -7  -4    0.87    0.67
   8  -7  -4   -0.20    0.83
   8  -7  -4   -0.45    0.71
   7  -7  -4    0.90    0.65
   7  -7  -4   -0.75    0.58
   7  -7  -4    0.15    0.84
   7  -7  -4   -0.84    0.72
   7  -7  -4   -1.41    0.75
   6  -7  -4   -0.16    0.73
   6  -7  -4    0.42    0.78
   6  -7  -4    0.17    0.69
   6  -7  -4    1.17    0.64
   6  -7  -4    0.59    0.62
   5  -7  -4   -1.09    0.65
   5  -7  -4   -0.37    0.70
   5  -7  -4   -0.76    0.69
   5  -7  -4    0.30    0.67
   5  -7  -4    0.23    0.61
   4  -7  -4    0.65    0.69
   4  -7  -4    0.19    0.68
   4  -7  -4   -0.30    0.60
   4  -7  -4   -0.15    0.67
   4  -7  -4    1.15    0.64
   3  -7  -4    1.09    0.73
   3  -7  -4    0.98    0.66
   3  -7  -4    0.74    0.65
   3  -7  -4   -0.03    0.64
   2  -7  -4   -0.06    0.58
   2  -7  -4    1.05    0.70
   2  -7  -4    1.13    0.71
   2  -7  -4   -0.39    0.58
   1  -7  -4    0.72    0.71
   1  -7  -4    0.16    0.62
   1  -7  -4   -0.90    0.69
   1  -7  -4   -0.43    0.68
   1  -7  -4   -0.21    0.54
   0  -7  -4    1.59    0.74
   0  -7  -4    0.42    0.73
   0  -7  -4    0.14    0.71
   0  -7  -4    0.00    0.56
   0  -7  -4   -0.92    0.49
   0   7   4   -0.08    0.50
  -1  -7  -4    0.73    0.67
  -1  -7  -4    0.03    0.71
  -1  -7  -4   -0.20    0.58
   1   7   4   -0.58    0.51
   1   7   4    0.36    0.53
  -2  -7  -4    2.08    0.77
  -2  -7  -4    1.77    0.61
  -2  -7  -4   -1.32    0.63
   2   7   4    1.17    0.65
   2   7   4    1.41    0.61
  -3  -7  -4   -0.57    0.72
  -3  -7  -4   -0.40    0.69
  -3  -7  -4    1.15    0.61
   3   7   4    0.43    0.59
   3   7   4   -0.39    0.57
  -4  -7  -4    0.79    0.72
  -4  -7  -4    0.40    0.60
   4   7   4    0.86    0.72
   4   7   4   -0.31    0.61
  -5  -7  -4   -0.10    0.61
  -5  -7  -4   -0.53    0.77
   5   7   4    0.45    0.67
   5   7   4    0.98    0.62
  -6  -7  -4    1.32    0.65
  -6  -7  -4    1.17    0.82
   6   7   4    0.61    0.66
  -7  -7  -4    0.24    0.63
  -7  -7  -4   -0.13    0.75
   7   7   4    1.29    0.77
   7   7   4    2.00    0.84
   9   7  -5    0.92    0.80
  -9  -7   5    2.71    0.94
  -9  -7   5    1.94    0.83
   8   7  -5    0.46    0.73
  -8  -7   5   -0.04    0.76
  -8  -7   5    0.43    0.73
   7   7  -5   -0.39    0.65
  -7  -7   5    0.30    0.81
  -7  -7   5    0.65    0.69
   6   7  -5    0.36    0.68
  -6  -7   5    0.94    0.72
  -6  -7   5    0.69    0.71
   5   7  -5    0.47    0.66
  -5  -7   5    0.14    0.65
  -5  -7   5    1.95    0.74
   4   7  -5    0.50    0.56
  -4  -7   5   -0.64    0.73
  -4  -7   5    0.08    0.66
   3   7  -5    1.39    0.61
  -3  -7   5    1.19    0.85
  -3  -7   5   -0.39    0.67
   2   7  -5    0.60    0.64
  -2  -7   5   -0.45    0.65
  -2  -7   5    0.86    0.77
   1   7  -5   -0.50    0.55
  -1  -7   5    0.10    0.62
  -1  -7   5   -0.03    0.45
  -1  -7   5   -0.93    0.67
   0   7  -5    0.29    0.55
   0   7  -5   -0.28    0.62
   0  -7   5    0.64    0.71
   0  -7   5    0.85    0.79
   0  -7   5    0.16    0.49
  -1   7  -5   -0.31    0.56
  -1   7  -5    1.40    0.65
   1  -7   5    0.96    0.57
   1  -7   5    0.42    0.73
[truncated: 1,065,927 more chars]
